# Supplementary material
Source: PubMed Central journal article supplement (PMC5205550)
Supplement: NIHMS822900-supplement-Supp_Table_S1-S2.pdf [file NIHMS822900-supplement-Supp_Table_S1-S2.pdf]

Supplementary Table 1. SNP replication across cohorts included in Adkins et al., 2015. The cohort Development (VTSABD); the Christchurch Health and Development Study (CHDS); and the Great report p-values for combined t-statistics; columns beginning with "fish\_" represents p-values con

| SNP        | CHR | A1 | FREQ   | BETA    | P         | Combin<br>VTSABD |
|------------|-----|----|--------|---------|-----------|------------------|
| rs10035899 | 5   | A  | 0.6328 | -0.0523 | 0.0009435 | 0.93179548       |
| rs10039368 | 5   | T  | 0.9577 | -0.1395 | 0.0002495 | 0.24173825       |
| rs10043528 | 5   | G  | 0.326  | -0.0541 | 0.0009093 | 0.05015194       |
| rs10057613 | 5   | G  | 0.5834 | 0.0615  | 6.56E-05  | 0.09176812       |
| rs10057784 | 5   | A  | 0.8601 | 0.0852  | 0.0001064 | 0.59054354       |
| rs1006173  | 4   | G  | 0.8848 | -0.0893 | 0.0002394 | 0.76856269       |
| rs1007126  | 20  | A  | 0.5445 | 0.0532  | 0.0004902 | 0.56231376       |
| rs1007631  | 16  | A  | 0.45   | 0.0535  | 0.0003798 | 0.26827148       |
| rs10097659 | 8   | G  | 0.6786 | 0.0547  | 0.0007839 | 0.22659729       |
| rs1009859  | 1   | G  | 0.6418 | -0.0585 | 0.0005086 | 0.58839808       |
| rs10118416 | 9   | G  | 0.7348 | 0.059   | 0.0008752 | 0.96123328       |
| rs10132666 | 14  | G  | 0.9132 | -0.0894 | 0.0008875 | 0.94522071       |
| rs10135315 | 14  | C  | 0.846  | -0.0811 | 0.0001325 | 0.42554067       |
| rs1014628  | 16  | G  | 0.3739 | 0.0535  | 0.0007751 | 0.16360068       |
| rs10153352 | 18  | C  | 0.5136 | 0.057   | 0.0002419 | 0.42492416       |
| rs10158645 | 1   | G  | 0.1493 | 0.0722  | 0.0006883 | 0.03844884       |
| rs10176121 | 2   | C  | 0.4703 | 0.0598  | 8.99E-05  | 0.35835638       |
| rs10178320 | 2   | T  | 0.2588 | -0.0684 | 9.33E-05  | 0.65850385       |
| rs10182407 | 2   | T  | 0.5866 | -0.0594 | 0.0002402 | 0.09473078       |
| rs10194124 | 2   | G  | 0.2582 | -0.0685 | 9.04E-05  | 0.64257637       |
| rs10199504 | 2   | A  | 0.4695 | 0.0607  | 6.96E-05  | 0.36202588       |
| rs10211389 | 2   | G  | 0.7164 | 0.0617  | 0.0002365 | 0.92361743       |
| rs1021598  | 18  | A  | 0.7016 | -0.0741 | 1.10E-05  | 0.29377034       |
| rs1021599  | 18  | G  | 0.7016 | -0.0741 | 1.10E-05  | 0.29453275       |
| rs10233081 | 7   | A  | 0.6507 | -0.0564 | 0.0004202 | 0.96075796       |
| rs10242    | 10  | T  | 0.97   | 0.1556  | 0.0004017 | 0.37579831       |
| rs1025299  | 5   | G  | 0.9702 | -0.1629 | 0.0002636 | 0.34363543       |
| rs10253843 | 7   | C  | 0.2407 | -0.0601 | 0.0006434 | 0.67684414       |
| rs10259821 | 7   | G  | 0.6507 | -0.0566 | 0.0004001 | 0.96027508       |
| rs10269209 | 7   | C  | 0.6828 | -0.0614 | 0.0005877 | 0.25126129       |
| rs10269243 | 7   | A  | 0.2404 | -0.0598 | 0.0006867 | 0.72909817       |
| rs10273051 | 7   | T  | 0.9555 | -0.1335 | 0.000808  | 0.75442126       |
| rs10282411 | 7   | C  | 0.4353 | 0.0524  | 0.0005634 | 0.69850283       |
| rs1029236  | 3   | T  | 0.5784 | 0.0545  | 0.0004365 | 0.16942789       |
| rs1029652  | 19  | T  | 0.308  | -0.0582 | 0.0003855 | 0.34558319       |
| rs1029845  | 19  | C  | 0.2962 | 0.0633  | 0.0001274 | 0.32383429       |

|            |      |        |         |           |            |
|------------|------|--------|---------|-----------|------------|
| rs1029931  | 12 T | 0.7296 | 0.0574  | 0.0008234 | 0.99090161 |
| rs1035149  | 7 G  | 0.6185 | 0.0523  | 0.0007698 | 0.05095447 |
| rs1037272  | 13 G | 0.8392 | -0.0751 | 0.0002508 | 0.54477614 |
| rs1038980  | 1 A  | 0.717  | -0.066  | 9.00E-05  | 0.66411822 |
| rs10405032 | 19 A | 0.9284 | -0.1074 | 0.0002337 | 0.42118098 |
| rs1041158  | 10 A | 0.0868 | -0.0971 | 0.0003133 | 0.19764213 |
| rs1042122  | 19 T | 0.8448 | 0.0705  | 0.0006215 | 0.8541754  |
| rs10423897 | 19 T | 0.6558 | -0.0607 | 0.0001904 | 0.02417568 |
| rs1044167  | 19 C | 0.6951 | 0.0615  | 0.0001794 | 0.97871087 |
| rs10444056 | 10 T | 0.8931 | -0.0842 | 0.0005736 | 0.80616115 |
| rs10464078 | 5 A  | 0.5897 | 0.0512  | 0.0009287 | 0.59468186 |
| rs10488407 | 7 G  | 0.854  | 0.075   | 0.0004237 | 0.58000312 |
| rs10490375 | 2 A  | 0.4964 | 0.0609  | 9.59E-05  | 0.2699985  |
| rs10492044 | 12 T | 0.7785 | -0.0662 | 0.0003321 | 0.43351822 |
| rs10492690 | 13 C | 0.7744 | -0.0608 | 0.0008317 | 0.79509437 |
| rs10492692 | 13 G | 0.7744 | -0.0608 | 0.0008288 | 0.78602174 |
| rs10496922 | 2 A  | 0.8871 | 0.0778  | 0.0008761 | 0.74780665 |
| rs10497627 | 2 C  | 0.5209 | -0.0542 | 0.0004228 | 0.71845114 |
| rs10497771 | 2 C  | 0.841  | 0.0692  | 0.0009394 | 0.61189153 |
| rs10505665 | 8 G  | 0.877  | 0.0838  | 0.0009577 | 0.1341174  |
| rs10508003 | 13 A | 0.7544 | 0.0593  | 0.0007098 | 0.35515108 |
| rs10515165 | 5 A  | 0.4791 | 0.0493  | 0.0009639 | 0.09701085 |
| rs10517576 | 4 T  | 0.9762 | -0.1827 | 0.000931  | 0.59594365 |
| rs10518089 | 4 G  | 0.7783 | 0.0636  | 0.0006114 | 0.65414313 |
| rs10519552 | 15 G | 0.8056 | -0.0665 | 0.0005097 | 0.35785326 |
| rs10519634 | 15 T | 0.3869 | 0.0523  | 0.0007135 | 0.3507139  |
| rs10519635 | 15 C | 0.3868 | 0.0523  | 0.0007182 | 0.35928764 |
| rs1054657  | 10 C | 0.9666 | 0.1513  | 0.0002865 | 0.44158083 |
| rs1058010  | 14 A | 0.9254 | -0.1061 | 0.0002732 | 0.6949655  |
| rs10740814 | 10 C | 0.3627 | -0.0542 | 0.0006987 | 0.86769726 |
| rs10743980 | 12 T | 0.4311 | 0.0502  | 0.0009109 | 0.77852697 |
| rs10745796 | 12 A | 0.9519 | 0.1283  | 0.0002803 | 0.26129159 |
| rs10755174 | 4 C  | 0.7786 | 0.0639  | 0.0005411 | 0.65218611 |
| rs10756981 | 9 G  | 0.3207 | 0.0589  | 0.0003123 | 0.70707953 |
| rs10763807 | 10 A | 0.8608 | 0.0752  | 0.0006738 | 0.18391644 |
| rs10766073 | 11 G | 0.7231 | -0.0598 | 0.0004798 | 0.05817682 |
| rs10810995 | 9 T  | 0.353  | 0.0564  | 0.0003802 | 0.26860409 |
| rs10815018 | 9 A  | 0.6598 | 0.0534  | 0.0008297 | 0.08748124 |
| rs10825356 | 10 G | 0.5059 | 0.0521  | 0.0005692 | 0.60937775 |
| rs10828121 | 10 C | 0.9145 | 0.0907  | 0.0007125 | 0.00902627 |
| rs10832021 | 11 G | 0.2886 | 0.0563  | 0.0008723 | 0.0877464  |

|            |      |        |         |           |            |
|------------|------|--------|---------|-----------|------------|
| rs10866605 | 5 C  | 0.3473 | -0.057  | 0.000367  | 0.19254579 |
| rs10876135 | 12 A | 0.0361 | -0.1515 | 0.0002349 | 0.07904776 |
| rs10886462 | 10 A | 0.7096 | 0.0547  | 0.0008917 | 0.23302967 |
| rs10906829 | 10 C | 0.9679 | 0.1529  | 0.0003283 | 0.36129513 |
| rs10915584 | 1 G  | 0.4694 | -0.0541 | 0.0003723 | 0.04792345 |
| rs10915587 | 1 C  | 0.4151 | -0.053  | 0.0005687 | 0.12269073 |
| rs10918127 | 1 C  | 0.3809 | 0.0558  | 0.0003388 | 0.34769086 |
| rs10935302 | 3 A  | 0.6847 | -0.0552 | 0.0006737 | 0.29456987 |
| rs10935303 | 3 T  | 0.6842 | -0.0542 | 0.0008264 | 0.29256306 |
| rs10935304 | 3 C  | 0.6847 | -0.055  | 0.0007062 | 0.2907808  |
| rs10935306 | 3 C  | 0.6888 | -0.0541 | 0.0009634 | 0.30111037 |
| rs10936027 | 3 T  | 0.8827 | -0.0898 | 0.0001683 | 0.08085181 |
| rs10946219 | 6 G  | 0.6656 | -0.0543 | 0.0008881 | 0.20908784 |
| rs10950900 | 7 G  | 0.9146 | 0.0908  | 0.0009621 | 0.5057645  |
| rs10951240 | 7 A  | 0.6168 | 0.0527  | 0.0007112 | 0.04866593 |
| rs10952333 | 7 T  | 0.6812 | 0.0697  | 1.83E-05  | 0.30019201 |
| rs1098938  | 2 T  | 0.256  | -0.0649 | 0.0002124 | 0.58930542 |
| rs11021024 | 11 A | 0.453  | -0.056  | 0.0002433 | 0.29862303 |
| rs11022765 | 11 C | 0.7485 | -0.059  | 0.0008396 | 0.05923837 |
| rs11023437 | 11 A | 0.4748 | -0.0533 | 0.0008748 | 0.28219988 |
| rs11054799 | 12 C | 0.7428 | -0.0666 | 0.0009442 | 0.60972328 |
| rs1105721  | 11 G | 0.6483 | 0.0773  | 2.28E-06  | 0.52456754 |
| rs11068156 | 12 A | 0.7502 | 0.0642  | 0.0002557 | 0.52123391 |
| rs11068157 | 12 T | 0.7674 | 0.0689  | 0.0001334 | 0.39449198 |
| rs11083030 | 18 G | 0.4072 | -0.0614 | 6.35E-05  | 0.42381094 |
| rs11090351 | 22 G | 0.8981 | 0.1086  | 1.42E-05  | 0.64229648 |
| rs11096738 | 4 T  | 0.9036 | 0.0863  | 0.0007431 | 0.14178193 |
| rs11124253 | 2 A  | 0.3099 | 0.0586  | 0.000351  | 0.56342557 |
| rs11124785 | 2 A  | 0.466  | 0.0614  | 5.90E-05  | 0.38572156 |
| rs11133035 | 4 T  | 0.5454 | 0.0547  | 0.0004436 | 0.4482132  |
| rs11158240 | 14 G | 0.9128 | -0.0935 | 0.000522  | 0.94062726 |
| rs11169696 | 12 A | 0.036  | -0.1533 | 0.0002093 | 0.08830552 |
| rs11169949 | 12 T | 0.761  | -0.0594 | 0.0009199 | 0.16778068 |
| rs11175454 | 12 C | 0.8445 | 0.0752  | 0.0002441 | 0.72946058 |
| rs11194219 | 10 G | 0.6237 | -0.0522 | 0.0009622 | 0.37137068 |
| rs11210289 | 1 T  | 0.1783 | 0.069   | 0.0005171 | 0.73579269 |
| rs11216493 | 11 C | 0.8775 | -0.0903 | 0.0002358 | 0.83030389 |
| rs11222498 | 11 A | 0.6064 | 0.0541  | 0.0005494 | 0.95127571 |
| rs11222509 | 11 T | 0.6146 | 0.0606  | 9.86E-05  | 0.99150944 |
| rs11231741 | 11 C | 0.692  | 0.0557  | 0.0007669 | 0.94222684 |
| rs11241219 | 5 T  | 0.9522 | -0.1342 | 0.0001649 | 0.57251125 |

|            |      |        |         |           |            |
|------------|------|--------|---------|-----------|------------|
| rs11244489 | 10 A | 0.9042 | -0.0888 | 0.0005509 | 0.73652351 |
| rs11244498 | 10 G | 0.9141 | -0.1031 | 0.0001245 | 0.35044913 |
| rs11244501 | 10 T | 0.9141 | -0.1031 | 0.0001248 | 0.34975333 |
| rs1124611  | 16 A | 0.2808 | 0.0736  | 1.09E-05  | 0.61564463 |
| rs11249609 | 5 G  | 0.7032 | 0.0578  | 0.0005967 | 0.52730785 |
| rs11251508 | 10 C | 0.5698 | -0.0522 | 0.0005969 | 0.36103807 |
| rs11251509 | 10 A | 0.5697 | -0.0523 | 0.0005768 | 0.39757154 |
| rs1125317  | 18 A | 0.748  | -0.0694 | 9.04E-05  | 0.25836131 |
| rs11255686 | 10 A | 0.5318 | 0.0543  | 0.0005202 | 0.76119435 |
| rs11259519 | 10 A | 0.9697 | 0.1985  | 7.79E-06  | 0.40150255 |
| rs11259520 | 10 T | 0.9679 | 0.1813  | 1.92E-05  | 0.76518473 |
| rs11259527 | 10 G | 0.9547 | 0.1318  | 0.0003142 | 0.52557193 |
| rs1126047  | 16 G | 0.4525 | 0.0541  | 0.000319  | 0.96911019 |
| rs11526191 | 7 C  | 0.9231 | -0.0952 | 0.0007687 | 0.38214834 |
| rs11573185 | 1 C  | 0.4595 | -0.0497 | 0.0009939 | 0.66252257 |
| rs11573219 | 1 T  | 0.5848 | -0.0512 | 0.0008796 | 0.07113987 |
| rs11573222 | 1 G  | 0.584  | -0.0512 | 0.000907  | 0.06143404 |
| rs11573272 | 1 A  | 0.6007 | -0.0533 | 0.0006312 | 0.14581238 |
| rs11577582 | 1 C  | 0.8109 | 0.066   | 0.0005357 | 0.6183551  |
| rs11588708 | 1 T  | 0.8041 | 0.0667  | 0.0005481 | 0.63217832 |
| rs11596696 | 10 T | 0.7103 | -0.0557 | 0.0009583 | 0.38915377 |
| rs11598010 | 10 A | 0.9688 | -0.1474 | 0.0007196 | 0.32693345 |
| rs11603601 | 11 C | 0.7197 | 0.0603  | 0.0008503 | 0.27740278 |
| rs11613965 | 12 C | 0.7801 | -0.0673 | 0.0002692 | 0.39146493 |
| rs11614019 | 12 C | 0.7629 | -0.0644 | 0.0003538 | 0.66983913 |
| rs11614284 | 12 T | 0.9661 | 0.1911  | 0.0004405 | 0.65438574 |
| rs11615787 | 12 C | 0.7102 | 0.0633  | 0.0002014 | 0.13053863 |
| rs11618409 | 13 T | 0.4692 | 0.0586  | 0.0001191 | 0.17488607 |
| rs11618423 | 13 C | 0.4718 | 0.0582  | 0.0001363 | 0.17888525 |
| rs11632435 | 15 A | 0.9021 | -0.1099 | 1.87E-05  | 0.04538855 |
| rs11636117 | 15 C | 0.9647 | -0.1368 | 0.0009386 | 0.69598326 |
| rs11651653 | 17 A | 0.9075 | 0.0937  | 0.0002921 | 0.69030108 |
| rs11667696 | 19 T | 0.8556 | -0.0726 | 0.0008396 | 0.69389494 |
| rs11685553 | 2 C  | 0.6896 | -0.0586 | 0.0003175 | 0.43783634 |
| rs11690118 | 2 C  | 0.6467 | 0.0564  | 0.0004613 | 0.63361465 |
| rs11693848 | 2 T  | 0.7336 | -0.0605 | 0.0008721 | 0.88811358 |
| rs11698323 | 20 T | 0.9663 | -0.1488 | 0.0004351 | 0.00426605 |
| rs1170189  | 13 G | 0.826  | -0.0695 | 0.0005218 | 0.89357749 |
| rs1170192  | 13 T | 0.8265 | -0.0697 | 0.0005352 | 0.97819278 |
| rs1170194  | 13 G | 0.8265 | -0.0697 | 0.0005352 | 0.97819278 |
| rs11715636 | 3 G  | 0.8933 | -0.0832 | 0.0009975 | 0.58839101 |

|            |      |        |         |           |            |
|------------|------|--------|---------|-----------|------------|
| rs11762979 | 7 C  | 0.5773 | 0.0542  | 0.0006384 | 0.66881359 |
| rs11765089 | 7 C  | 0.7137 | 0.0661  | 0.0001723 | 0.30617545 |
| rs11771330 | 7 C  | 0.5689 | -0.0516 | 0.0007889 | 0.17028287 |
| rs11790910 | 9 A  | 0.9123 | 0.089   | 0.0008503 | 0.333625   |
| rs11803213 | 1 A  | 0.9345 | -0.11   | 0.000365  | 0.71680405 |
| rs11803905 | 1 C  | 0.7307 | -0.0621 | 0.0003278 | 0.65149084 |
| rs11821811 | 11 C | 0.7764 | 0.0666  | 0.000533  | 0.63167134 |
| rs11838143 | 12 C | 0.7744 | -0.0641 | 0.0004557 | 0.40638781 |
| rs11841247 | 13 G | 0.8408 | -0.0719 | 0.0004649 | 0.64975702 |
| rs11844740 | 14 T | 0.429  | 0.0543  | 0.000431  | 0.39320009 |
| rs11846935 | 14 T | 0.9635 | -0.135  | 0.0008297 | 0.51093527 |
| rs11871549 | 17 C | 0.1825 | -0.0727 | 0.0007866 | 0.20239525 |
| rs11880656 | 19 G | 0.8432 | 0.0782  | 0.0003321 | 0.82404456 |
| rs11886857 | 2 A  | 0.5003 | 0.0605  | 7.50E-05  | 0.30335805 |
| rs11891511 | 2 T  | 0.803  | -0.063  | 0.0008539 | 0.89413659 |
| rs11896276 | 2 T  | 0.5017 | 0.0609  | 7.26E-05  | 0.29137805 |
| rs11897863 | 2 G  | 0.5002 | 0.0604  | 7.81E-05  | 0.29578284 |
| rs11915859 | 3 T  | 0.6847 | -0.055  | 0.0007083 | 0.28936273 |
| rs11925186 | 3 A  | 0.6861 | -0.0535 | 0.0009804 | 0.2660104  |
| rs11946728 | 4 G  | 0.5463 | 0.0549  | 0.0004121 | 0.4470715  |
| rs11960198 | 5 A  | 0.2737 | -0.0569 | 0.0009437 | 0.27132674 |
| rs11968507 | 6 C  | 0.8419 | 0.0719  | 0.0004575 | 0.03962027 |
| rs11979077 | 7 A  | 0.7622 | -0.0599 | 0.00075   | 0.17638829 |
| rs12055028 | 5 G  | 0.6876 | 0.0629  | 0.0001547 | 0.29166416 |
| rs12128914 | 1 C  | 0.7786 | 0.0621  | 0.00083   | 0.17437038 |
| rs12131363 | 1 C  | 0.8218 | -0.0798 | 0.0008546 | 0.92846893 |
| rs12149164 | 16 G | 0.799  | 0.0768  | 5.66E-05  | 0.40549973 |
| rs12150218 | 17 G | 0.6758 | 0.0564  | 0.0005301 | 0.13840873 |
| rs1220565  | 13 T | 0.561  | -0.0533 | 0.0005687 | 0.46409931 |
| rs12206518 | 6 T  | 0.5988 | 0.0669  | 1.19E-05  | 0.98971808 |
| rs12206583 | 6 T  | 0.5985 | 0.0671  | 1.13E-05  | 0.99146235 |
| rs12216318 | 6 C  | 0.6516 | 0.0665  | 2.95E-05  | 0.5425102  |
| rs12228865 | 12 C | 0.9608 | 0.1329  | 0.0006687 | 0.21744164 |
| rs12313137 | 12 G | 0.8744 | 0.0763  | 0.0009049 | 0.99820583 |
| rs12328227 | 2 A  | 0.8869 | 0.0783  | 0.0007933 | 0.81191482 |
| rs12333620 | 7 G  | 0.7786 | -0.0608 | 0.0008902 | 0.93862156 |
| rs1233651  | 17 C | 0.1948 | 0.0631  | 0.0009905 | 0.83252703 |
| rs12344339 | 9 T  | 0.6215 | 0.0578  | 0.0008368 | 0.69273252 |
| rs12351138 | 9 T  | 0.9589 | -0.1352 | 0.0004202 | 0.64846647 |
| rs12405479 | 1 G  | 0.9503 | -0.1225 | 0.0004503 | 0.37517506 |
| rs12405585 | 1 C  | 0.872  | -0.0764 | 0.0007552 | 0.49611002 |

|            |      |        |         |           |            |
|------------|------|--------|---------|-----------|------------|
| rs12415813 | 10 T | 0.4779 | 0.0544  | 0.0002763 | 0.43520024 |
| rs12417042 | 11 C | 0.7411 | -0.0592 | 0.0006416 | 0.88140185 |
| rs12431160 | 13 A | 0.8339 | 0.0664  | 0.0009487 | 0.25873747 |
| rs12440187 | 15 G | 0.9709 | -0.1832 | 0.0002479 | 0.60684237 |
| rs12450893 | 17 A | 0.6743 | 0.0559  | 0.0005935 | 0.14428933 |
| rs12462846 | 19 A | 0.9257 | -0.111  | 0.0001392 | 0.28107673 |
| rs12472523 | 2 C  | 0.6348 | -0.0554 | 0.0004682 | 0.22467272 |
| rs12481235 | 20 C | 0.6816 | 0.0635  | 9.22E-05  | 0.49116169 |
| rs12491264 | 3 T  | 0.6606 | -0.0537 | 0.0007927 | 0.25507559 |
| rs12501403 | 4 G  | 0.4804 | 0.0514  | 0.0007142 | 0.40833119 |
| rs12536073 | 7 G  | 0.7878 | 0.0681  | 0.000372  | 0.10369042 |
| rs12585317 | 13 C | 0.8284 | 0.0803  | 5.54E-05  | 0.56566216 |
| rs12587122 | 14 A | 0.255  | 0.0691  | 6.01E-05  | 0.66135727 |
| rs12618138 | 2 T  | 0.9698 | -0.1464 | 0.000941  | 0.24728122 |
| rs12618194 | 2 T  | 0.9698 | -0.1464 | 0.0009413 | 0.25307752 |
| rs12623821 | 2 C  | 0.8932 | -0.0918 | 0.0001791 | 0.86614186 |
| rs12624511 | 20 G | 0.8629 | -0.0876 | 7.35E-05  | 0.14599953 |
| rs12632107 | 3 G  | 0.6837 | -0.0548 | 0.0007213 | 0.29956411 |
| rs12635525 | 3 A  | 0.5937 | 0.0564  | 0.0002165 | 0.82299677 |
| rs12636763 | 3 A  | 0.7317 | 0.059   | 0.0006016 | 0.46762509 |
| rs12649726 | 4 C  | 0.8945 | -0.0891 | 0.0002519 | 0.08455054 |
| rs12669558 | 7 T  | 0.7926 | -0.0669 | 0.0003553 | 0.21942926 |
| rs12670199 | 7 T  | 0.9252 | -0.0978 | 0.0007367 | 0.63355363 |
| rs12683683 | 9 A  | 0.7015 | -0.058  | 0.0004798 | 0.24703277 |
| rs12691654 | 2 G  | 0.5164 | -0.0613 | 5.99E-05  | 0.34096389 |
| rs12696657 | 3 C  | 0.6037 | 0.0602  | 0.0001205 | 0.99512235 |
| rs12704037 | 7 C  | 0.7108 | 0.0556  | 0.0009936 | 0.92722503 |
| rs12706812 | 7 A  | 0.3204 | 0.0655  | 6.49E-05  | 0.50103155 |
| rs12714541 | 3 A  | 0.3581 | 0.0567  | 0.0003874 | 0.22877842 |
| rs12735197 | 1 C  | 0.6757 | -0.0545 | 0.000851  | 0.26735832 |
| rs12827588 | 12 T | 0.9484 | -0.121  | 0.0003998 | 0.20127932 |
| rs12830084 | 12 G | 0.8345 | -0.0814 | 5.72E-05  | 0.79539122 |
| rs12831873 | 12 G | 0.9478 | -0.1229 | 0.0003258 | 0.2062031  |
| rs12855239 | 13 T | 0.7547 | 0.0577  | 0.0009752 | 0.36333033 |
| rs12901270 | 15 A | 0.7172 | 0.0624  | 0.0007283 | 0.36156887 |
| rs12906402 | 15 A | 0.4768 | 0.0626  | 0.0005212 | 0.73909973 |
| rs12911875 | 15 A | 0.6037 | 0.0511  | 0.0009665 | 0.59706335 |
| rs12912234 | 15 T | 0.2049 | 0.0747  | 5.98E-05  | 0.49755695 |
| rs12913150 | 15 C | 0.6627 | -0.0614 | 0.0003439 | 0.86532216 |
| rs12936336 | 17 G | 0.9361 | -0.1222 | 8.87E-05  | 0.96800446 |
| rs12936822 | 17 A | 0.9358 | -0.1245 | 8.48E-05  | 0.99331187 |

|            |      |        |         |           |            |
|------------|------|--------|---------|-----------|------------|
| rs12943652 | 17 G | 0.6727 | 0.0577  | 0.000364  | 0.14670456 |
| rs12949992 | 17 G | 0.9368 | -0.1263 | 4.97E-05  | 0.96964736 |
| rs1295085  | 1 A  | 0.3695 | 0.0679  | 1.11E-05  | 0.35521236 |
| rs12964478 | 18 C | 0.7298 | -0.0575 | 0.0009116 | 0.23693971 |
| rs12978999 | 19 C | 0.7502 | 0.0659  | 0.0001896 | 0.16733793 |
| rs12980435 | 19 G | 0.7959 | -0.0698 | 0.0002614 | 0.02463026 |
| rs12986266 | 19 T | 0.8274 | 0.0801  | 0.0001426 | 0.86466149 |
| rs12987477 | 2 T  | 0.4555 | -0.0528 | 0.0004844 | 0.22755811 |
| rs12995040 | 2 C  | 0.6738 | 0.056   | 0.0005201 | 0.68306524 |
| rs13008814 | 2 G  | 0.9006 | 0.0997  | 0.0001143 | 0.60593554 |
| rs13018232 | 2 G  | 0.6735 | 0.0564  | 0.000477  | 0.68881624 |
| rs13022034 | 2 C  | 0.7603 | -0.0642 | 0.0005476 | 0.58606477 |
| rs13028776 | 2 T  | 0.4865 | -0.0567 | 0.0002455 | 0.1888714  |
| rs13033768 | 2 A  | 0.1828 | -0.0673 | 0.0006342 | 0.72324743 |
| rs13064628 | 3 C  | 0.8688 | -0.0743 | 0.0008279 | 0.11316307 |
| rs13068206 | 3 G  | 0.5083 | 0.0511  | 0.0006682 | 0.46408563 |
| rs13073054 | 3 G  | 0.1999 | 0.0679  | 0.0003372 | 0.04494927 |
| rs13073658 | 3 G  | 0.9117 | -0.0919 | 0.0005741 | 0.35254251 |
| rs13074860 | 3 T  | 0.5541 | -0.0547 | 0.0004462 | 0.01075283 |
| rs13084370 | 3 G  | 0.6207 | 0.0536  | 0.0006788 | 0.0453115  |
| rs13091440 | 3 G  | 0.9115 | -0.0924 | 0.0005199 | 0.36384695 |
| rs13101018 | 3 T  | 0.6847 | -0.0552 | 0.0006765 | 0.2946502  |
| rs131100   | 22 T | 0.8728 | -0.0757 | 0.0008249 | 0.63237093 |
| rs13140884 | 4 C  | 0.9036 | 0.0863  | 0.0007422 | 0.16381821 |
| rs13164333 | 5 G  | 0.9606 | -0.1424 | 0.0003488 | 0.15879571 |
| rs1324065  | 13 T | 0.3842 | -0.0531 | 0.0007734 | 0.84599079 |
| rs13289572 | 9 C  | 0.8606 | 0.0763  | 0.0009695 | 0.4808682  |
| rs1331726  | 13 T | 0.3664 | -0.0541 | 0.000518  | 0.32331543 |
| rs13322529 | 3 A  | 0.7151 | -0.0588 | 0.0004889 | 0.2784401  |
| rs13323477 | 3 C  | 0.9015 | 0.0898  | 0.0004591 | 0.79469    |
| rs1333472  | 13 A | 0.8036 | 0.0717  | 0.0001816 | 0.81216332 |
| rs13378699 | 13 T | 0.7744 | -0.0608 | 0.0008317 | 0.77152958 |
| rs1338551  | 6 C  | 0.4331 | -0.0601 | 8.11E-05  | 0.02960056 |
| rs13393937 | 2 C  | 0.8744 | 0.0776  | 0.0007083 | 0.54377693 |
| rs1342049  | 1 C  | 0.9878 | 0.234   | 0.0007626 | NA         |
| rs13421232 | 2 C  | 0.5581 | 0.0521  | 0.000702  | 0.28038123 |
| rs13438187 | 7 G  | 0.6915 | 0.0642  | 0.0005054 | 0.10751809 |
| rs1350604  | 10 T | 0.8785 | -0.0885 | 0.0001492 | 0.71470473 |
| rs1350606  | 10 G | 0.88   | -0.0868 | 0.0001946 | 0.73560248 |
| rs1351036  | 3 T  | 0.3672 | 0.0545  | 0.0006508 | 0.18425841 |
| rs1351039  | 3 C  | 0.3581 | 0.0569  | 0.0003727 | 0.22597782 |

|           |      |        |         |           |            |
|-----------|------|--------|---------|-----------|------------|
| rs1361152 | 10 G | 0.5318 | 0.0541  | 0.00054   | 0.72644498 |
| rs1361946 | 7 T  | 0.3212 | 0.0631  | 0.0001202 | 0.50219638 |
| rs1366840 | 2 C  | 0.4584 | -0.0528 | 0.0005174 | 0.69638643 |
| rs1369973 | 4 G  | 0.6182 | -0.0521 | 0.0008954 | 0.6404162  |
| rs1371060 | 5 C  | 0.5365 | 0.0585  | 0.000252  | 0.60495093 |
| rs1372256 | 2 G  | 0.8058 | -0.0743 | 0.0001341 | 0.84533647 |
| rs1373967 | 5 G  | 0.3195 | -0.0592 | 0.0003212 | 0.60084025 |
| rs1374666 | 11 A | 0.8321 | -0.0695 | 0.0007432 | 0.32658065 |
| rs1382066 | 3 C  | 0.4259 | 0.0545  | 0.0003905 | 0.42079232 |
| rs1382069 | 3 T  | 0.3581 | 0.0567  | 0.0003874 | 0.22877842 |
| rs1390890 | 5 G  | 0.7086 | 0.0583  | 0.0005316 | 0.55483563 |
| rs1391451 | 18 T | 0.4705 | -0.051  | 0.0008366 | 0.81974604 |
| rs1392543 | 4 C  | 0.8856 | -0.09   | 0.0002186 | 0.76929086 |
| rs1392544 | 4 G  | 0.884  | -0.0837 | 0.0004879 | 0.65322421 |
| rs1396190 | 4 C  | 0.7015 | -0.0614 | 0.0005686 | 0.44240506 |
| rs1404988 | 5 T  | 0.1296 | 0.09    | 0.0005533 | NA         |
| rs1426723 | 18 G | 0.5558 | 0.0641  | 2.92E-05  | 0.5561676  |
| rs1430006 | 3 C  | 0.2518 | 0.0649  | 0.0003032 | 0.70976558 |
| rs1435135 | 4 C  | 0.6052 | -0.0513 | 0.000966  | 0.78986107 |
| rs1438937 | 5 G  | 0.5525 | 0.0527  | 0.000613  | 0.1782119  |
| rs1447200 | 2 A  | 0.4925 | -0.0554 | 0.0002996 | 0.19597799 |
| rs1448621 | 2 T  | 0.9243 | 0.1067  | 0.0002565 | 0.94550102 |
| rs1449506 | 13 T | 0.8399 | -0.0739 | 0.0003263 | 0.55828565 |
| rs1453774 | 2 T  | 0.4916 | 0.0514  | 0.0007007 | 0.80928024 |
| rs1462947 | 4 G  | 0.6715 | 0.0643  | 6.40E-05  | 0.34129344 |
| rs1463146 | 2 G  | 0.9236 | 0.1067  | 0.0002384 | 0.97280823 |
| rs1469513 | 2 T  | 0.5696 | 0.0512  | 0.0009606 | 0.72749034 |
| rs1475036 | 14 A | 0.8077 | -0.0649 | 0.0005931 | 0.48483747 |
| rs1480898 | 4 G  | 0.8575 | 0.0721  | 0.0008243 | 0.5798199  |
| rs1482531 | 18 T | 0.3427 | -0.059  | 0.0001864 | 0.94587815 |
| rs1507055 | 18 T | 0.4999 | 0.0543  | 0.0003953 | 0.23542122 |
| rs1511036 | 18 T | 0.7476 | -0.0706 | 6.60E-05  | 0.25836878 |
| rs1519812 | 8 A  | 0.635  | -0.0549 | 0.0005162 | 0.58635256 |
| rs1519813 | 8 C  | 0.6079 | -0.0515 | 0.0008817 | 0.87588141 |
| rs1520887 | 11 T | 0.7595 | 0.0614  | 0.0006187 | 0.51755343 |
| rs1523586 | 18 A | 0.7476 | -0.0707 | 6.53E-05  | 0.25215297 |
| rs1523589 | 18 C | 0.7744 | -0.0624 | 0.000661  | 0.18956802 |
| rs1528007 | 4 T  | 0.8976 | -0.083  | 0.0008291 | 0.81265315 |
| rs1537618 | 10 G | 0.613  | -0.0679 | 8.19E-05  | 0.39934947 |
| rs1537832 | 6 C  | 0.543  | -0.0548 | 0.0004505 | 0.69764273 |
| rs1537833 | 6 G  | 0.5402 | -0.0547 | 0.000393  | 0.70061272 |



|            |      |        |         |           |            |
|------------|------|--------|---------|-----------|------------|
| rs1544454  | 7 G  | 0.7875 | 0.0657  | 0.0004472 | 0.12576919 |
| rs1545474  | 19 A | 0.6307 | -0.0637 | 8.19E-05  | 0.04146022 |
| rs154674   | 5 T  | 0.8938 | -0.0808 | 0.0009889 | 0.03119246 |
| rs1552089  | 4 A  | 0.8575 | 0.0721  | 0.0008324 | 0.53495982 |
| rs1552846  | 17 T | 0.2304 | 0.0685  | 0.0002825 | 0.90998358 |
| rs155320   | 18 G | 0.4781 | 0.0519  | 0.0006957 | 0.16127187 |
| rs1553664  | 18 G | 0.5852 | 0.0513  | 0.0007614 | 0.39734172 |
| rs1555074  | 20 G | 0.8627 | -0.0833 | 0.0001555 | 0.24892912 |
| rs1561451  | 2 A  | 0.2581 | -0.0684 | 9.32E-05  | 0.65731111 |
| rs1561572  | 1 G  | 0.1692 | 0.0676  | 0.0008544 | 0.50833758 |
| rs1570881  | 13 G | 0.6445 | -0.0548 | 0.0005957 | 0.10981551 |
| rs1572597  | 10 A | 0.5844 | 0.0513  | 0.000913  | 0.80687405 |
| rs1576458  | 13 A | 0.6075 | 0.0544  | 0.0005752 | 0.22966155 |
| rs1578642  | 1 C  | 0.3821 | -0.0563 | 0.0002973 | 0.02820305 |
| rs1584832  | 2 A  | 0.6897 | -0.0593 | 0.0002703 | 0.45514826 |
| rs1596518  | 12 C | 0.3031 | 0.0588  | 0.0003345 | 0.52903406 |
| rs1605085  | 3 T  | 0.5394 | 0.0523  | 0.0005772 | 0.95013654 |
| rs1607267  | 2 C  | 0.8494 | -0.0768 | 0.0003276 | 0.42262574 |
| rs160862   | 7 C  | 0.4954 | 0.0532  | 0.0004927 | 0.05034757 |
| rs1610062  | 19 G | 0.3311 | 0.0578  | 0.000348  | 0.66555768 |
| rs1616002  | 11 T | 0.2789 | -0.0604 | 0.0006139 | 0.01902715 |
| rs1618603  | 18 T | 0.6577 | -0.0743 | 8.91E-06  | 0.92055739 |
| rs162418   | 18 G | 0.6607 | -0.0693 | 3.30E-05  | 0.88431274 |
| rs162419   | 18 A | 0.6606 | -0.0693 | 3.33E-05  | 0.89172333 |
| rs1641215  | 7 C  | 0.6173 | 0.0524  | 0.0007459 | 0.05274244 |
| rs1666568  | 15 G | 0.2874 | -0.0564 | 0.0007923 | 0.89257465 |
| rs1666995  | 2 C  | 0.9362 | 0.1082  | 0.00059   | 0.78187211 |
| rs1676089  | 18 A | 0.8843 | -0.0801 | 0.0006327 | 0.70824911 |
| rs16823382 | 2 G  | 0.9755 | -0.1784 | 0.0003458 | NA         |
| rs16835297 | 3 C  | 0.2006 | 0.0668  | 0.0004184 | 0.04410224 |
| rs16839817 | 1 T  | 0.7129 | -0.0607 | 0.0003336 | 0.87698781 |
| rs16845084 | 3 T  | 0.8459 | 0.076   | 0.0002901 | 0.46419472 |
| rs16845116 | 3 C  | 0.8492 | 0.0762  | 0.0003265 | 0.46888556 |
| rs16863147 | 3 G  | 0.9474 | 0.1124  | 0.0009853 | 0.79735603 |
| rs16873319 | 5 A  | 0.9827 | -0.2075 | 0.0003143 | NA         |
| rs16903911 | 5 A  | 0.8568 | 0.0782  | 0.0003409 | 0.94481134 |
| rs16916489 | 12 T | 0.7744 | -0.0644 | 0.0004314 | 0.38949737 |
| rs16920485 | 12 G | 0.7774 | -0.0688 | 0.0001811 | 0.39220322 |
| rs16920845 | 9 A  | 0.959  | -0.1343 | 0.0004387 | 0.65824662 |
| rs16929088 | 9 T  | 0.6042 | 0.0529  | 0.0007308 | 0.5725318  |
| rs16932216 | 12 T | 0.8029 | -0.0687 | 0.0003501 | 0.83545196 |

|            |      |        |         |           |            |
|------------|------|--------|---------|-----------|------------|
| rs1693310  | 18 T | 0.6931 | -0.0625 | 0.0002277 | 0.92520038 |
| rs1693336  | 18 C | 0.7359 | -0.058  | 0.0008827 | 0.66609312 |
| rs16935797 | 11 T | 0.8509 | -0.0793 | 0.0001697 | 0.43525927 |
| rs16943468 | 17 T | 0.9327 | -0.1229 | 4.95E-05  | 0.96924403 |
| rs16943470 | 17 A | 0.937  | -0.1294 | 3.39E-05  | 0.96929455 |
| rs16943481 | 17 T | 0.9365 | -0.1282 | 3.78E-05  | 0.96949091 |
| rs16952683 | 13 G | 0.7543 | 0.0593  | 0.0007058 | 0.36306289 |
| rs16959046 | 17 A | 0.904  | -0.0852 | 0.000905  | 0.18684998 |
| rs1697229  | 1 G  | 0.147  | 0.0846  | 8.01E-05  | 0.83674821 |
| rs16987310 | 19 C | 0.748  | 0.0647  | 0.0001998 | 0.17419153 |
| rs17023216 | 2 G  | 0.8869 | 0.0862  | 0.0003601 | 0.5973546  |
| rs17046574 | 3 A  | 0.9605 | 0.1305  | 0.0007608 | 0.15065608 |
| rs17050859 | 4 T  | 0.2164 | 0.0621  | 0.0005913 | 0.97858207 |
| rs1705465  | 18 C | 0.5621 | 0.057   | 0.0001958 | 0.99110852 |
| rs1705477  | 18 G | 0.6927 | -0.0639 | 0.0001566 | 0.94059101 |
| rs17058855 | 13 A | 0.7744 | -0.0608 | 0.0008288 | 0.78781476 |
| rs17058858 | 13 A | 0.7744 | -0.0608 | 0.0008287 | 0.79006084 |
| rs17070999 | 5 C  | 0.6511 | 0.0628  | 8.65E-05  | 0.778001   |
| rs17071776 | 8 C  | 0.9373 | -0.1059 | 0.0008238 | 0.54965307 |
| rs17084754 | 4 C  | 0.8962 | -0.0919 | 0.000176  | 0.07956257 |
| rs17084794 | 4 C  | 0.8963 | -0.0936 | 0.0001312 | 0.08780052 |
| rs17088616 | 8 C  | 0.888  | 0.0815  | 0.000779  | 0.64265712 |
| rs17095545 | 14 G | 0.913  | -0.0894 | 0.0008779 | 0.94525014 |
| rs17106169 | 14 T | 0.8079 | -0.0675 | 0.0003874 | 0.53042899 |
| rs17106195 | 14 C | 0.8077 | -0.0649 | 0.0005902 | 0.48555394 |
| rs17145813 | 7 C  | 0.781  | -0.0612 | 0.0008826 | 0.43893828 |
| rs17153088 | 8 A  | 0.8725 | -0.0763 | 0.0008739 | 0.79673    |
| rs17158445 | 15 G | 0.8914 | -0.0812 | 0.0009569 | 0.8016176  |
| rs17166013 | 7 G  | 0.8097 | -0.0713 | 0.0002306 | 0.2990718  |
| rs17175240 | 2 G  | 0.8876 | 0.0795  | 0.0006806 | 0.80641691 |
| rs17180544 | 2 A  | 0.8407 | 0.0691  | 0.0009967 | 0.55431097 |
| rs17180890 | 2 T  | 0.7067 | -0.0577 | 0.0005303 | 0.62327779 |
| rs17200503 | 3 C  | 0.9536 | -0.1404 | 0.0004302 | 0.27773567 |
| rs17213633 | 4 G  | 0.8575 | 0.072   | 0.0008323 | 0.58233139 |
| rs17228009 | 13 A | 0.9212 | -0.0939 | 0.0009839 | 0.84429323 |
| rs17277553 | 9 C  | 0.8772 | -0.0913 | 8.25E-05  | 0.81438737 |
| rs1728596  | 7 C  | 0.6049 | 0.0586  | 0.0002853 | 0.05516166 |
| rs1729969  | 3 G  | 0.8101 | -0.0637 | 0.0009973 | 0.72703448 |
| rs17316057 | 10 A | 0.825  | 0.0673  | 0.0008026 | 0.27135587 |
| rs17362283 | 2 T  | 0.8421 | 0.0755  | 0.0002964 | 0.76318472 |
| rs17363053 | 2 T  | 0.8426 | 0.0715  | 0.0006144 | 0.9434627  |

|            |      |        |         |           |            |
|------------|------|--------|---------|-----------|------------|
| rs17379153 | 5 C  | 0.7975 | 0.0652  | 0.0004693 | 0.12119071 |
| rs17397108 | 1 A  | 0.8163 | -0.0964 | 9.61E-07  | 0.25688185 |
| rs17435444 | 4 A  | 0.9372 | -0.122  | 0.0002373 | 0.29065242 |
| rs17447650 | 10 A | 0.9513 | -0.1212 | 0.0005535 | 0.45938211 |
| rs17449954 | 4 T  | 0.9433 | 0.1088  | 0.0009246 | 0.44574127 |
| rs17456275 | 4 C  | 0.5241 | -0.0506 | 0.0006509 | 0.31047205 |
| rs17457012 | 5 C  | 0.6624 | -0.0575 | 0.0003398 | 0.73720833 |
| rs17458210 | 1 T  | 0.8521 | -0.0756 | 0.0004242 | 0.02984893 |
| rs17466589 | 1 A  | 0.7307 | -0.0621 | 0.0003254 | 0.65423663 |
| rs17483979 | 4 A  | 0.7623 | -0.0645 | 0.0002793 | 0.20687631 |
| rs17485392 | 13 T | 0.8305 | 0.0737  | 0.0002452 | 0.72380808 |
| rs17491367 | 7 A  | 0.703  | 0.069   | 4.16E-05  | 0.32124479 |
| rs17492088 | 12 G | 0.7798 | -0.0646 | 0.0004767 | 0.43728584 |
| rs17492618 | 12 A | 0.7629 | -0.0641 | 0.0003851 | 0.66828556 |
| rs17495854 | 2 C  | 0.7396 | -0.0625 | 0.0006544 | 0.93990139 |
| rs17500759 | 5 C  | 0.8901 | -0.0855 | 0.0009078 | 0.99248281 |
| rs17608302 | 10 C | 0.7612 | -0.0602 | 0.0005734 | 0.77209564 |
| rs17621536 | 1 A  | 0.8717 | -0.0762 | 0.0007824 | 0.4975173  |
| rs17621621 | 1 G  | 0.8694 | -0.0754 | 0.0007322 | 0.48897389 |
| rs17633025 | 2 T  | 0.5583 | 0.0509  | 0.0009252 | 0.28082423 |
| rs17634234 | 2 T  | 0.5488 | 0.054   | 0.0004953 | 0.13843133 |
| rs17634670 | 2 G  | 0.497  | 0.0611  | 6.75E-05  | 0.28660219 |
| rs17637747 | 16 G | 0.5544 | -0.0532 | 0.000554  | 0.55073023 |
| rs17643060 | 5 T  | 0.6496 | 0.063   | 8.01E-05  | 0.82514259 |
| rs17643126 | 5 C  | 0.6516 | 0.0616  | 0.0001175 | 0.74770092 |
| rs17694135 | 6 A  | 0.5444 | -0.0532 | 0.0005887 | 0.49934227 |
| rs17711503 | 19 A | 0.9256 | -0.1109 | 0.0001338 | 0.26356379 |
| rs1771752  | 6 A  | 0.2868 | 0.0627  | 0.0001409 | 0.82197515 |
| rs17729322 | 7 G  | 0.9092 | -0.0972 | 0.0002313 | 0.8241416  |
| rs17741422 | 16 T | 0.8052 | 0.0786  | 4.64E-05  | 0.42907035 |
| rs17748074 | 18 A | 0.5828 | 0.0607  | 9.90E-05  | 0.41510159 |
| rs17748116 | 18 C | 0.5747 | 0.0625  | 5.19E-05  | 0.54940568 |
| rs17776911 | 19 T | 0.8555 | -0.0721 | 0.0008728 | 0.30871238 |
| rs17785543 | 8 G  | 0.7566 | -0.0614 | 0.0005248 | 0.58674898 |
| rs17789761 | 20 C | 0.8623 | -0.083  | 0.0001619 | 0.24558623 |
| rs17796758 | 7 A  | 0.9046 | -0.1039 | 6.85E-05  | 0.89068155 |
| rs17800283 | 15 G | 0.9343 | -0.1065 | 0.0005841 | 0.67270905 |
| rs17833070 | 3 T  | 0.9211 | -0.1031 | 0.0004958 | 0.75255893 |
| rs1813823  | 2 A  | 0.5602 | -0.0517 | 0.0006718 | 0.84654925 |
| rs1823024  | 5 G  | 0.3191 | -0.0595 | 0.0003088 | 0.53736702 |
| rs184434   | 18 A | 0.8847 | -0.0806 | 0.0005826 | 0.9870275  |

|           |      |        |         |           |            |
|-----------|------|--------|---------|-----------|------------|
| rs1853793 | 13 G | 0.2938 | -0.0586 | 0.00054   | 0.15527701 |
| rs1860741 | 7 A  | 0.5655 | -0.052  | 0.00065   | 0.13804216 |
| rs1863590 | 8 C  | 0.8288 | -0.0701 | 0.0004282 | 0.09634649 |
| rs1865229 | 16 C | 0.4232 | -0.0522 | 0.0006615 | 0.85153036 |
| rs1866452 | 2 A  | 0.259  | -0.069  | 7.97E-05  | 0.65882318 |
| rs1871738 | 4 G  | 0.8557 | 0.072   | 0.0007962 | 0.57646587 |
| rs1880413 | 19 T | 0.6769 | -0.0555 | 0.0006292 | 0.91886105 |
| rs1884777 | 14 G | 0.9277 | -0.0988 | 0.0008677 | 0.25003611 |
| rs1890507 | 10 A | 0.3479 | -0.0546 | 0.0006902 | 0.94734753 |
| rs1891318 | 1 T  | 0.5609 | -0.0516 | 0.0006801 | 0.03187644 |
| rs189518  | 15 C | 0.2393 | -0.0617 | 0.0005691 | 0.51069422 |
| rs1904454 | 5 G  | 0.4979 | -0.0507 | 0.0008028 | 0.73833112 |
| rs1910884 | 3 C  | 0.5083 | 0.0511  | 0.000669  | 0.47466904 |
| rs193139  | 1 T  | 0.871  | -0.0793 | 0.0004432 | 0.47905928 |
| rs1941741 | 11 T | 0.8587 | -0.0768 | 0.0005042 | 0.53446865 |
| rs1949305 | 3 C  | 0.9132 | -0.1022 | 0.0001454 | 0.33954104 |
| rs1950377 | 14 A | 0.0673 | 0.1094  | 0.0003456 | 0.35149416 |
| rs1951215 | 14 T | 0.9635 | -0.135  | 0.0008289 | 0.51113078 |
| rs1962503 | 18 A | 0.87   | 0.0783  | 0.0004675 | 0.7458364  |
| rs1969008 | 10 C | 0.226  | -0.0645 | 0.0008857 | 0.98144319 |
| rs1974696 | 2 G  | 0.5433 | -0.0502 | 0.0009548 | 0.01818121 |
| rs1980034 | 18 C | 0.7473 | -0.0683 | 0.0001103 | 0.25549583 |
| rs1985270 | 1 G  | 0.1003 | 0.1033  | 4.83E-05  | 0.02082278 |
| rs1992886 | 2 G  | 0.7738 | -0.0628 | 0.0004505 | 0.75718103 |
| rs1994465 | 7 G  | 0.831  | -0.0669 | 0.0008487 | 0.18201297 |
| rs1995232 | 3 G  | 0.6026 | 0.0574  | 0.0002098 | 0.820955   |
| rs1995235 | 3 C  | 0.5967 | 0.0588  | 0.0001396 | 0.82956177 |
| rs1997125 | 7 T  | 0.9524 | 0.1281  | 0.0005984 | 0.41040216 |
| rs1997890 | 22 A | 0.4354 | -0.0525 | 0.0004305 | 0.00993366 |
| rs2001722 | 2 T  | 0.8746 | 0.0757  | 0.0009235 | 0.3531994  |
| rs2006768 | 18 A | 0.6082 | 0.0539  | 0.0007975 | 0.11938526 |
| rs201010  | 6 T  | 0.3559 | 0.0535  | 0.0007047 | 0.99718571 |
| rs201011  | 6 A  | 0.3558 | 0.054   | 0.0006632 | 0.98162751 |
| rs201059  | 6 T  | 0.4645 | -0.0557 | 0.0003139 | 0.09029504 |
| rs2016327 | 4 A  | 0.9036 | 0.0863  | 0.0007422 | 0.14837001 |
| rs2020887 | 1 C  | 0.6494 | -0.0566 | 0.0003719 | 0.46280229 |
| rs2037563 | 3 C  | 0.6853 | -0.0534 | 0.0009876 | 0.27943987 |
| rs2042925 | 5 C  | 0.8595 | 0.0791  | 0.0003017 | 0.9595794  |
| rs2044732 | 13 A | 0.7913 | -0.0721 | 0.0001008 | 0.92753437 |
| rs2054402 | 3 C  | 0.4261 | 0.054   | 0.0004412 | 0.45759786 |
| rs2060984 | 8 T  | 0.5513 | 0.0571  | 0.0001576 | 0.43753526 |

|           |      |        |         |           |            |
|-----------|------|--------|---------|-----------|------------|
| rs2063359 | 3 G  | 0.2006 | 0.0668  | 0.0004175 | 0.04378158 |
| rs2063360 | 3 T  | 0.1998 | 0.0681  | 0.0003264 | 0.04469666 |
| rs2063361 | 3 A  | 0.1999 | 0.068   | 0.00033   | 0.04338065 |
| rs206420  | 18 G | 0.4908 | -0.054  | 0.0004362 | 0.37005431 |
| rs2071246 | 5 G  | 0.2358 | -0.0683 | 0.000506  | 0.51761335 |
| rs2073210 | 6 G  | 0.8183 | -0.0677 | 0.0006879 | 0.75500361 |
| rs2073211 | 6 A  | 0.828  | -0.0676 | 0.0009038 | 0.47230742 |
| rs2076378 | 20 C | 0.8628 | -0.0834 | 0.0001639 | 0.25029969 |
| rs2076387 | 20 T | 0.8632 | -0.088  | 6.33E-05  | 0.14585089 |
| rs2076388 | 20 C | 0.863  | -0.0875 | 7.19E-05  | 0.14585089 |
| rs2076389 | 20 G | 0.863  | -0.0879 | 7.01E-05  | 0.14575445 |
| rs2076390 | 20 C | 0.8628 | -0.0881 | 6.84E-05  | 0.14568883 |
| rs2078183 | 5 C  | 0.4539 | -0.0518 | 0.0008372 | 0.9521188  |
| rs2101869 | 12 T | 0.6786 | 0.0571  | 0.0005074 | 0.27702304 |
| rs2111671 | 2 C  | 0.9756 | -0.1792 | 0.0003263 | NA         |
| rs2118788 | 5 G  | 0.5501 | 0.053   | 0.0005619 | 0.17508822 |
| rs2126000 | 2 C  | 0.5072 | -0.0579 | 0.000136  | 0.17840089 |
| rs2128867 | 4 C  | 0.0958 | -0.097  | 0.000147  | 0.45129417 |
| rs2131774 | 1 A  | 0.2595 | -0.0612 | 0.0008107 | 0.83000896 |
| rs2135137 | 4 G  | 0.8833 | -0.0831 | 0.0005211 | 0.78227037 |
| rs2138885 | 2 G  | 0.9208 | -0.0962 | 0.0005726 | 0.38805378 |
| rs2141597 | 3 A  | 0.5482 | -0.0534 | 0.0005675 | 0.0306174  |
| rs215974  | 6 G  | 0.1141 | 0.0941  | 0.0001801 | 0.94945568 |
| rs2159944 | 12 T | 0.7305 | 0.0567  | 0.0009562 | 0.98492808 |
| rs2166503 | 2 G  | 0.4217 | -0.0532 | 0.000547  | 0.95127098 |
| rs216779  | 21 A | 0.9331 | 0.1063  | 0.0004462 | 0.0381523  |
| rs216782  | 21 T | 0.9332 | 0.106   | 0.0004928 | 0.03950709 |
| rs2186355 | 21 C | 0.8584 | 0.0828  | 0.0001234 | 0.23318452 |
| rs2194433 | 2 T  | 0.4666 | 0.0598  | 9.50E-05  | 0.34467242 |
| rs2194435 | 2 T  | 0.5382 | 0.0539  | 0.0004661 | 0.15996532 |
| rs2194442 | 2 C  | 0.5581 | 0.0521  | 0.0007002 | 0.28290944 |
| rs220128  | 21 A | 0.4437 | -0.0649 | 2.25E-05  | 0.43106158 |
| rs220136  | 21 A | 0.4377 | -0.0656 | 1.59E-05  | 0.44148941 |
| rs220139  | 21 C | 0.438  | -0.0563 | 0.0002725 | 0.08737276 |
| rs220305  | 21 A | 0.4784 | -0.0516 | 0.0007465 | 0.49689049 |
| rs220860  | 11 C | 0.1777 | -0.0667 | 0.0007362 | 0.70769833 |
| rs220862  | 11 C | 0.1646 | -0.0795 | 0.0001014 | 0.52342668 |
| rs2216817 | 2 A  | 0.4678 | 0.0598  | 9.37E-05  | 0.35195633 |
| rs2219740 | 3 A  | 0.5771 | -0.0566 | 0.0002389 | 0.52105275 |
| rs2245046 | 19 G | 0.9508 | 0.1443  | 3.60E-05  | 0.12024959 |
| rs2245409 | 6 A  | 0.8793 | -0.077  | 0.0008962 | 0.55979662 |

|           |      |        |         |           |            |
|-----------|------|--------|---------|-----------|------------|
| rs2250509 | 1 A  | 0.1226 | -0.0768 | 0.000849  | 0.23271719 |
| rs225536  | 12 A | 0.1951 | -0.0725 | 0.0002341 | 0.42673364 |
| rs2280694 | 19 A | 0.9508 | 0.1423  | 4.67E-05  | 0.12005141 |
| rs2282492 | 11 T | 0.6193 | -0.053  | 0.0007425 | 0.12693989 |
| rs2284610 | 21 G | 0.9452 | -0.1147 | 0.000623  | 0.67530176 |
| rs2285803 | 6 T  | 0.2777 | 0.057   | 0.0007288 | 0.74704509 |
| rs2289357 | 2 T  | 0.4345 | 0.0516  | 0.0009282 | 0.61284001 |
| rs2290019 | 16 C | 0.7947 | 0.0651  | 0.0006819 | 0.29234212 |
| rs2303771 | 16 G | 0.6543 | 0.0629  | 8.73E-05  | 0.47139139 |
| rs2314126 | 3 A  | 0.713  | -0.0578 | 0.0006198 | 0.2793041  |
| rs2320174 | 13 G | 0.2637 | -0.0673 | 8.07E-05  | 0.95260472 |
| rs2339414 | 2 A  | 0.9282 | -0.1054 | 0.0003638 | 0.34706993 |
| rs2339516 | 2 G  | 0.9284 | -0.1053 | 0.000359  | 0.36031619 |
| rs2341876 | 19 A | 0.951  | 0.1431  | 4.28E-05  | 0.15841079 |
| rs2341877 | 19 C | 0.951  | 0.143   | 4.32E-05  | 0.12089462 |
| rs2351390 | 17 C | 0.8953 | 0.0845  | 0.0006727 | 0.63427889 |
| rs2357090 | 4 T  | 0.7824 | -0.0596 | 0.0009448 | 0.50842568 |
| rs2360783 | 4 T  | 0.9036 | 0.0863  | 0.0007422 | 0.16288831 |
| rs2368432 | 10 T | 0.2943 | -0.0568 | 0.0007466 | 0.95271699 |
| rs2374145 | 2 C  | 0.5207 | 0.0574  | 0.0001912 | 0.25424684 |
| rs2374313 | 7 C  | 0.5275 | 0.0554  | 0.0002583 | 0.78687105 |
| rs2389137 | 13 C | 0.6869 | 0.0551  | 0.0007361 | 0.86945719 |
| rs2396215 | 2 T  | 0.6732 | 0.0562  | 0.0005081 | 0.68702979 |
| rs2397132 | 6 G  | 0.0764 | -0.1046 | 0.0007573 | 0.16310282 |
| rs2418977 | 10 T | 0.8611 | 0.0785  | 0.0003125 | 0.17795754 |
| rs2423760 | 20 C | 0.3632 | -0.0532 | 0.0006353 | 0.53333466 |
| rs242542  | 20 A | 0.8927 | -0.0895 | 0.0005791 | 0.48013509 |
| rs2427393 | 20 G | 0.793  | -0.0727 | 0.0001781 | 0.42134875 |
| rs2447949 | 11 A | 0.3302 | 0.0566  | 0.0004315 | 0.36447295 |
| rs2454057 | 10 T | 0.5284 | -0.0547 | 0.0004426 | 0.76378253 |
| rs2503782 | 6 A  | 0.5256 | 0.051   | 0.0008975 | 0.32942388 |
| rs2503784 | 6 T  | 0.5258 | 0.0512  | 0.00085   | 0.32917307 |
| rs2505059 | 6 A  | 0.5258 | 0.0512  | 0.0008666 | 0.32867097 |
| rs2513638 | 11 T | 0.357  | -0.059  | 0.0002044 | 0.30586141 |
| rs2513645 | 11 A | 0.356  | -0.0578 | 0.0002816 | 0.28544051 |
| rs2513649 | 11 T | 0.3565 | -0.0563 | 0.0005011 | 0.28134045 |
| rs2547369 | 19 T | 0.9509 | 0.1292  | 0.0002341 | 0.11819816 |
| rs2547370 | 19 C | 0.9516 | 0.1339  | 0.0001329 | 0.12005141 |
| rs2547372 | 19 G | 0.9517 | 0.1357  | 0.0001161 | 0.12005141 |
| rs2547380 | 19 A | 0.9508 | 0.1444  | 3.51E-05  | 0.11961383 |
| rs2547385 | 19 G | 0.9509 | 0.1435  | 4.12E-05  | 0.1198773  |

|            |      |        |         |           |            |
|------------|------|--------|---------|-----------|------------|
| rs2547390  | 19 A | 0.9508 | 0.1445  | 3.47E-05  | 0.12008495 |
| rs2550730  | 16 C | 0.5961 | -0.0527 | 0.0008516 | 0.14724012 |
| rs26189    | 5 A  | 0.1083 | 0.0869  | 0.0007907 | 0.9475943  |
| rs264193   | 18 C | 0.4783 | 0.0519  | 0.0007012 | 0.15682977 |
| rs264202   | 18 T | 0.4759 | 0.0533  | 0.000442  | 0.12904193 |
| rs264233   | 18 G | 0.4781 | 0.0543  | 0.0003813 | 0.10695845 |
| rs264234   | 18 T | 0.4986 | 0.053   | 0.0005135 | 0.14445589 |
| rs264246   | 18 A | 0.4766 | 0.0517  | 0.0006729 | 0.12904193 |
| rs2666805  | 18 A | 0.6576 | -0.0742 | 9.05E-06  | 0.92087895 |
| rs267526   | 3 A  | 0.4022 | -0.0548 | 0.0004355 | 0.21730952 |
| rs2680308  | 5 T  | 0.9719 | -0.1786 | 0.0002543 | 0.91756463 |
| rs2680603  | 8 C  | 0.2087 | -0.0676 | 0.0004976 | 0.24019615 |
| rs2694539  | 19 G | 0.9509 | 0.1291  | 0.0002398 | 0.11724879 |
| rs2694555  | 19 T | 0.9508 | 0.1401  | 6.13E-05  | 0.12005141 |
| rs2720751  | 8 C  | 0.4245 | -0.0538 | 0.0004991 | 0.64067321 |
| rs27547    | 5 C  | 0.2809 | 0.0587  | 0.0005643 | 0.58582285 |
| rs2760364  | 13 A | 0.6269 | -0.0518 | 0.0009712 | 0.17550858 |
| rs2760365  | 13 T | 0.6266 | -0.0527 | 0.0008061 | 0.17494348 |
| rs27723    | 5 G  | 0.2598 | 0.0595  | 0.0005603 | 0.36936284 |
| rs2777625  | 13 T | 0.3666 | -0.0538 | 0.000541  | 0.3230514  |
| rs2785836  | 13 G | 0.3666 | -0.0538 | 0.0005416 | 0.32295312 |
| rs2793482  | 13 T | 0.3513 | 0.0627  | 7.70E-05  | 0.37363912 |
| rs2793483  | 13 G | 0.3522 | 0.0637  | 5.87E-05  | 0.37531104 |
| rs2798329  | 6 C  | 0.2469 | 0.059   | 0.0006547 | 0.87281237 |
| rs2813672  | 1 A  | 0.097  | 0.0916  | 0.0002611 | 0.69491375 |
| rs2813673  | 1 T  | 0.0973 | 0.0905  | 0.000302  | 0.69525839 |
| rs2813675  | 1 C  | 0.0937 | 0.0917  | 0.0003261 | 0.69420267 |
| rs281380   | 19 T | 0.6345 | 0.0542  | 0.0005582 | 0.05337985 |
| rs2815634  | 10 G | 0.9093 | 0.0895  | 0.0006839 | 0.38626586 |
| rs2824758  | 21 T | 0.7336 | -0.0632 | 0.0004075 | 0.03710002 |
| rs2829444  | 21 G | 0.7902 | 0.0708  | 0.0001834 | 0.35408766 |
| rs2834143  | 21 A | 0.8619 | 0.0792  | 0.000279  | 0.23033392 |
| rs2834144  | 21 A | 0.8632 | 0.0785  | 0.0003211 | 0.23278945 |
| rs2834150  | 21 A | 0.6957 | 0.0606  | 0.0002259 | 0.08013802 |
| rs2834630  | 21 A | 0.1071 | -0.0919 | 0.000933  | 0.42207154 |
| rs2835930  | 21 C | 0.7815 | -0.0665 | 0.0002739 | 0.74841651 |
| rs2835931  | 21 C | 0.7815 | -0.0665 | 0.0002739 | 0.74841651 |
| rs2850247  | 11 C | 0.7051 | 0.0565  | 0.0007181 | 0.70345018 |
| rs28549095 | 3 A  | 0.4249 | 0.0551  | 0.0003402 | 0.42560133 |
| rs2861667  | 5 C  | 0.347  | -0.0553 | 0.0005426 | 0.18839077 |
| rs2861857  | 2 A  | 0.4367 | -0.0519 | 0.0006877 | 0.16670226 |

|            |      |        |         |           |            |
|------------|------|--------|---------|-----------|------------|
| rs2869621  | 20 A | 0.1546 | -0.0743 | 0.0003777 | 0.00387838 |
| rs2875402  | 4 G  | 0.3088 | -0.0555 | 0.0007291 | 0.66266726 |
| rs2882155  | 2 T  | 0.6911 | -0.0606 | 0.0002095 | 0.49647216 |
| rs2886862  | 7 G  | 0.5259 | -0.0518 | 0.0006391 | 0.07286869 |
| rs2895436  | 6 A  | 0.8015 | 0.0665  | 0.0005884 | 0.31121767 |
| rs2901486  | 18 G | 0.7473 | -0.0699 | 7.74E-05  | 0.25075504 |
| rs2914267  | 5 G  | 0.7968 | 0.0635  | 0.0009472 | 0.08447964 |
| rs2927258  | 18 C | 0.9351 | 0.113   | 0.0002658 | 0.20633508 |
| rs2940273  | 4 C  | 0.7697 | 0.0651  | 0.0002383 | 0.48954935 |
| rs2956173  | 8 A  | 0.6033 | 0.0515  | 0.0009421 | 0.69194811 |
| rs2973628  | 5 T  | 0.205  | -0.0638 | 0.0006291 | 0.1041468  |
| rs2981423  | 18 T | 0.9354 | 0.107   | 0.0005515 | 0.21171657 |
| rs299699   | 1 G  | 0.7416 | -0.0589 | 0.0006736 | 0.68046118 |
| rs3094663  | 6 T  | 0.2778 | 0.0568  | 0.0007602 | 0.74704273 |
| rs31731    | 5 A  | 0.5688 | 0.0556  | 0.0003052 | 0.09016286 |
| rs317716   | 7 G  | 0.495  | 0.0528  | 0.000541  | 0.05108932 |
| rs317726   | 7 T  | 0.4945 | 0.0508  | 0.0008661 | 0.05780123 |
| rs323122   | 18 A | 0.8848 | -0.0791 | 0.0007404 | 0.98653122 |
| rs330267   | 18 T | 0.7099 | -0.0718 | 2.50E-05  | 0.758063   |
| rs330286   | 18 A | 0.6955 | -0.0593 | 0.0004366 | 0.98598398 |
| rs330287   | 18 T | 0.4425 | -0.0627 | 4.29E-05  | 0.5561676  |
| rs330299   | 18 T | 0.6606 | -0.0693 | 3.37E-05  | 0.89785861 |
| rs330303   | 18 G | 0.694  | -0.0622 | 0.0002307 | 0.96863219 |
| rs330304   | 18 T | 0.6939 | -0.0621 | 0.0002385 | 0.95803986 |
| rs330305   | 18 A | 0.6934 | -0.0617 | 0.0002638 | 0.92415925 |
| rs330326   | 18 C | 0.7372 | -0.0583 | 0.0008528 | 0.66710244 |
| rs336277   | 18 T | 0.4383 | 0.0554  | 0.0003702 | 0.81296452 |
| rs336279   | 18 A | 0.5506 | 0.051   | 0.0008737 | 0.19297666 |
| rs338479   | 1 C  | 0.7932 | -0.064  | 0.0007843 | 0.4582255  |
| rs346617   | 8 T  | 0.2049 | -0.0614 | 0.0008983 | 0.43971811 |
| rs35295960 | 2 T  | 0.6396 | 0.0576  | 0.0003233 | 0.47078239 |
| rs358683   | 1 C  | 0.2037 | 0.0631  | 0.0008564 | 0.75601903 |
| rs358684   | 1 A  | 0.2035 | 0.063   | 0.0008623 | 0.75627617 |
| rs358685   | 1 C  | 0.1716 | 0.0751  | 0.000211  | 0.67344885 |
| rs36496    | 19 C | 0.1932 | 0.0791  | 3.20E-05  | 0.41537657 |
| rs3732569  | 3 A  | 0.9126 | -0.1009 | 0.0001693 | 0.35203702 |
| rs3732593  | 3 G  | 0.8342 | -0.0682 | 0.0009745 | 0.64218913 |
| rs3733767  | 5 G  | 0.9702 | -0.1626 | 0.0002712 | 0.34617821 |
| rs3744311  | 17 C | 0.6501 | -0.0583 | 0.0009743 | 0.97416477 |
| rs3744787  | 17 A | 0.8632 | 0.0755  | 0.0005803 | 0.12921234 |
| rs3752400  | 4 A  | 0.8945 | -0.0891 | 0.0002511 | 0.08401398 |



|            |      |        |         |           |            |
|------------|------|--------|---------|-----------|------------|
| rs3761952  | 1 C  | 0.9512 | -0.1248 | 0.0004324 | 0.37957253 |
| rs3767225  | 1 T  | 0.5845 | -0.0522 | 0.0007143 | 0.07058594 |
| rs3789433  | 1 A  | 0.25   | 0.0588  | 0.0008155 | 0.88524229 |
| rs3789638  | 1 G  | 0.9513 | -0.1243 | 0.0004501 | 0.37700606 |
| rs3800784  | 7 T  | 0.5441 | 0.0533  | 0.0006718 | 0.95120995 |
| rs3813141  | 19 C | 0.7481 | 0.0647  | 0.0001994 | 0.17471435 |
| rs3813143  | 19 G | 0.748  | 0.0647  | 0.0001999 | 0.17434036 |
| rs3815362  | 11 C | 0.6922 | 0.0559  | 0.0007205 | 0.96582456 |
| rs3817422  | 2 G  | 0.2476 | -0.0638 | 0.0002934 | 0.57191026 |
| rs3822423  | 5 G  | 0.9702 | -0.1626 | 0.0002713 | 0.34662348 |
| rs3848663  | 19 G | 0.8555 | -0.0721 | 0.000878  | 0.30905273 |
| rs3911131  | 18 G | 0.6602 | -0.0547 | 0.0006188 | 0.12312401 |
| rs3923106  | 3 A  | 0.5482 | -0.0507 | 0.000911  | 0.03544631 |
| rs400819   | 21 C | 0.0833 | 0.0925  | 0.0007427 | 0.17450711 |
| rs406338   | 8 G  | 0.9124 | -0.0877 | 0.0009807 | 0.94707302 |
| rs4074399  | 1 C  | 0.9258 | -0.1184 | 4.77E-05  | 0.38709357 |
| rs4092257  | 1 G  | 0.4182 | -0.0541 | 0.0005613 | 0.10941067 |
| rs41466649 | 8 G  | 0.829  | -0.0703 | 0.000422  | 0.10023713 |
| rs41508146 | 4 T  | 0.6346 | -0.0589 | 0.0001891 | 0.38821324 |
| rs4234206  | 3 T  | 0.234  | 0.0652  | 0.0003033 | 0.48943186 |
| rs4237360  | 10 T | 0.7858 | 0.0639  | 0.0006898 | 0.22942332 |
| rs4264950  | 5 T  | 0.9827 | -0.2075 | 0.0003143 | NA         |
| rs4267192  | 13 G | 0.634  | 0.0552  | 0.0003921 | 0.32611022 |
| rs4296033  | 11 T | 0.1209 | 0.0829  | 0.0003516 | 0.00057289 |
| rs4298423  | 7 T  | 0.3332 | -0.078  | 1.43E-06  | 0.61295344 |
| rs4322543  | 13 A | 0.7343 | 0.0705  | 3.25E-05  | 0.97122964 |
| rs4330312  | 4 T  | 0.4686 | 0.0501  | 0.0009673 | 0.42702738 |
| rs4344834  | 18 T | 0.4446 | -0.0635 | 3.37E-05  | 0.5561676  |
| rs4346965  | 8 A  | 0.8194 | -0.0676 | 0.0006799 | 0.43570177 |
| rs4349303  | 2 G  | 0.0873 | -0.0942 | 0.0004474 | 0.53257106 |
| rs4350702  | 2 G  | 0.1017 | -0.0903 | 0.0004102 | 0.8880274  |
| rs4351607  | 1 A  | 0.9215 | -0.1064 | 0.0001772 | 0.38433853 |
| rs4359402  | 15 G | 0.939  | -0.1338 | 0.0001168 | 0.07698805 |
| rs4363773  | 14 T | 0.0674 | 0.1113  | 0.0002719 | 0.33744823 |
| rs4365462  | 2 A  | 0.0294 | -0.162  | 0.0003114 | 0.75799924 |
| rs4372953  | 2 T  | 0.5195 | 0.0579  | 0.0001752 | 0.26506207 |
| rs437302   | 20 G | 0.9007 | -0.0875 | 0.0005995 | 0.22124303 |
| rs4384177  | 1 G  | 0.1466 | 0.085   | 7.49E-05  | 0.79272167 |
| rs4385081  | 4 T  | 0.8564 | 0.0715  | 0.0008765 | 0.55749418 |
| rs4418307  | 7 C  | 0.656  | 0.0622  | 0.0004658 | 0.18307227 |
| rs4439630  | 13 G | 0.362  | 0.0558  | 0.0004586 | 0.178152   |

|           |      |        |         |           |            |
|-----------|------|--------|---------|-----------|------------|
| rs4442821 | 16 G | 0.4757 | 0.0572  | 0.0001473 | 0.56720821 |
| rs4448804 | 13 G | 0.7744 | -0.0608 | 0.0008317 | 0.77150239 |
| rs4456645 | 2 C  | 0.4555 | -0.0529 | 0.000473  | 0.21812519 |
| rs4463087 | 4 A  | 0.7824 | -0.0596 | 0.0009624 | 0.50842568 |
| rs4493295 | 2 T  | 0.9137 | -0.1069 | 0.0001044 | 0.52491494 |
| rs4507317 | 4 G  | 0.4804 | 0.0514  | 0.0007107 | 0.40829101 |
| rs454768  | 18 A | 0.6035 | 0.0534  | 0.0008965 | 0.15059623 |
| rs4581598 | 13 C | 0.6334 | 0.0538  | 0.0005428 | 0.32254957 |
| rs4583203 | 15 T | 0.3856 | 0.0528  | 0.0006738 | 0.37153941 |
| rs4603206 | 10 C | 0.7858 | 0.0634  | 0.000806  | 0.38495567 |
| rs4609889 | 17 C | 0.6682 | 0.0567  | 0.0004491 | 0.13942294 |
| rs4619812 | 3 A  | 0.6853 | -0.0534 | 0.0009875 | 0.28794764 |
| rs4640402 | 2 A  | 0.5891 | -0.0534 | 0.0005079 | 0.51480434 |
| rs465305  | 5 A  | 0.0861 | 0.0953  | 0.000379  | 0.45109118 |
| rs4655148 | 1 A  | 0.5848 | -0.0512 | 0.0008794 | 0.07097087 |
| rs4659536 | 1 T  | 0.6757 | -0.0545 | 0.000851  | 0.26735832 |
| rs4662295 | 2 C  | 0.4547 | -0.0516 | 0.000623  | 0.23675451 |
| rs4662299 | 2 G  | 0.5178 | -0.0625 | 3.88E-05  | 0.35808691 |
| rs466712  | 5 A  | 0.0713 | 0.1025  | 0.000462  | 0.3662898  |
| rs4668780 | 2 C  | 0.6908 | -0.0596 | 0.0002603 | 0.44146049 |
| rs4677758 | 3 T  | 0.2251 | 0.0691  | 0.000209  | 0.45243638 |
| rs4696604 | 4 T  | 0.884  | -0.0837 | 0.0004824 | 0.78269488 |
| rs4697528 | 4 G  | 0.3094 | -0.0566 | 0.0005769 | 0.62367744 |
| rs4698412 | 4 G  | 0.4608 | 0.0567  | 0.0001923 | 0.3477674  |
| rs4698414 | 4 A  | 0.1948 | 0.0907  | 2.28E-06  | 0.75699117 |
| rs4698415 | 4 T  | 0.2087 | 0.0776  | 3.92E-05  | 0.62827291 |
| rs4701028 | 5 T  | 0.6454 | 0.0556  | 0.0004757 | 0.73586626 |
| rs4717344 | 7 C  | 0.8597 | -0.0767 | 0.0006614 | 0.48377425 |
| rs4726988 | 7 T  | 0.5146 | -0.0518 | 0.0005039 | 0.3676671  |
| rs4727353 | 7 A  | 0.9355 | 0.1039  | 0.0007887 | 0.50683758 |
| rs4731366 | 7 C  | 0.26   | 0.0587  | 0.0008021 | 0.57510141 |
| rs4737532 | 8 G  | 0.1272 | 0.0856  | 0.000166  | 0.54750985 |
| rs4743638 | 9 C  | 0.3464 | -0.0604 | 0.0001562 | 0.35490222 |
| rs4746839 | 10 G | 0.0714 | 0.1068  | 0.0003087 | 0.2536425  |
| rs4746841 | 10 T | 0.0714 | 0.1067  | 0.0003087 | 0.25159689 |
| rs4748856 | 10 A | 0.7858 | 0.0633  | 0.0008197 | 0.38824696 |
| rs4755320 | 11 C | 0.8451 | -0.0693 | 0.0009665 | 0.6377867  |
| rs4758298 | 11 T | 0.9364 | -0.103  | 0.0008834 | 0.10778233 |
| rs4765234 | 12 T | 0.9556 | 0.1272  | 0.0006149 | 0.77499971 |
| rs4767439 | 12 G | 0.7574 | 0.0654  | 0.0001968 | 0.41376902 |
| rs4767440 | 12 A | 0.7563 | 0.0671  | 0.0001309 | 0.34291345 |

|           |      |        |         |           |            |
|-----------|------|--------|---------|-----------|------------|
| rs4768953 | 12 A | 0.964  | 0.1522  | 0.0002269 | 0.08893992 |
| rs4779952 | 15 C | 0.5953 | 0.0534  | 0.0005403 | 0.74911047 |
| rs4782685 | 16 A | 0.0694 | -0.1006 | 0.0008002 | 0.82345894 |
| rs4796911 | 18 G | 0.4955 | 0.053   | 0.0006316 | 0.19527889 |
| rs4823954 | 22 G | 0.9327 | -0.1079 | 0.000422  | 0.50627489 |
| rs4833651 | 4 A  | 0.2165 | 0.0596  | 0.0008986 | 0.98233121 |
| rs4840341 | 8 G  | 0.6937 | 0.0566  | 0.0005912 | 0.22888451 |
| rs4853951 | 2 G  | 0.0895 | -0.0948 | 0.0007042 | 0.92362562 |
| rs485446  | 18 G | 0.9357 | 0.1093  | 0.000447  | 0.20731927 |
| rs4857674 | 3 C  | 0.5484 | -0.0513 | 0.0007866 | 0.0350609  |
| rs4858302 | 3 A  | 0.7319 | 0.0675  | 9.95E-05  | 0.59362107 |
| rs4876153 | 8 A  | 0.6866 | 0.0571  | 0.0005073 | 0.24094074 |
| rs4886014 | 13 A | 0.8198 | 0.0678  | 0.0004806 | 0.12995947 |
| rs4886543 | 15 G | 0.7734 | -0.0607 | 0.0009432 | 0.1509653  |
| rs4902438 | 14 A | 0.5816 | -0.0604 | 0.0002616 | 0.54303549 |
| rs4910363 | 11 A | 0.2574 | 0.061   | 0.0004639 | 0.89420044 |
| rs4913455 | 12 T | 0.813  | -0.0636 | 0.0009491 | 0.26035482 |
| rs4921518 | 5 A  | 0.6094 | 0.0601  | 0.0001269 | 0.54417217 |
| rs4932425 | 15 G | 0.8894 | -0.0981 | 9.29E-05  | 0.0469314  |
| rs4932427 | 15 T | 0.8727 | -0.1    | 1.72E-05  | 0.00947763 |
| rs4932428 | 15 G | 0.8804 | -0.1023 | 1.71E-05  | 0.00934895 |
| rs4937609 | 11 C | 0.6445 | 0.0726  | 4.73E-06  | 0.52304969 |
| rs4937612 | 11 G | 0.4473 | 0.061   | 0.0006256 | NA         |
| rs4941417 | 13 C | 0.8411 | -0.0721 | 0.0004588 | 0.64977294 |
| rs4942097 | 13 A | 0.8398 | -0.0746 | 0.0002871 | 0.59148557 |
| rs4942101 | 13 C | 0.8391 | -0.0745 | 0.0002857 | 0.53346527 |
| rs4959307 | 6 G  | 0.8176 | 0.0665  | 0.0007444 | 0.30047954 |
| rs496809  | 18 C | 0.9299 | 0.1106  | 0.0001959 | 0.20884206 |
| rs497785  | 18 G | 0.9352 | 0.1084  | 0.0004682 | 0.20708992 |
| rs4981264 | 14 C | 0.6272 | 0.0538  | 0.0005293 | 0.15704564 |
| rs501332  | 1 A  | 0.2697 | 0.0619  | 0.000339  | 0.65196076 |
| rs504583  | 1 T  | 0.6178 | 0.0563  | 0.0002979 | 0.02943336 |
| rs520354  | 2 A  | 0.5149 | -0.0542 | 0.0004304 | 0.55401956 |
| rs521973  | 5 G  | 0.7606 | 0.065   | 0.0002979 | 0.13705237 |
| rs532010  | 6 A  | 0.6169 | -0.0549 | 0.0003542 | 0.838474   |
| rs540364  | 15 C | 0.8918 | -0.0898 | 0.0002181 | 0.19913695 |
| rs543027  | 8 A  | 0.9046 | -0.0861 | 0.0008389 | 0.03450201 |
| rs545602  | 13 T | 0.1899 | 0.0691  | 0.0003539 | 0.3536466  |
| rs559606  | 8 C  | 0.0895 | 0.0906  | 0.000623  | 0.28604095 |
| rs563634  | 15 G | 0.1879 | 0.0691  | 0.0005296 | 0.41377425 |
| rs563765  | 13 C | 0.2646 | -0.0661 | 9.81E-05  | 0.94269149 |

|           |      |        |         |           |            |
|-----------|------|--------|---------|-----------|------------|
| rs568998  | 15 C | 0.3867 | 0.0519  | 0.0007828 | 0.36949186 |
| rs570900  | 15 A | 0.3865 | 0.0527  | 0.0006479 | 0.35925647 |
| rs570956  | 15 T | 0.8922 | -0.0888 | 0.0002443 | 0.20682616 |
| rs571877  | 17 A | 0.7484 | 0.0611  | 0.0004493 | 0.75615791 |
| rs574342  | 19 G | 0.8666 | -0.0762 | 0.0005993 | 0.57322474 |
| rs577241  | 13 T | 0.2646 | -0.0661 | 9.81E-05  | 0.93803974 |
| rs577774  | 5 G  | 0.0868 | 0.0976  | 0.0002597 | 0.2475703  |
| rs590273  | 18 G | 0.6581 | 0.0575  | 0.0002643 | 0.95770985 |
| rs5996780 | 22 G | 0.8982 | 0.1077  | 1.68E-05  | 0.64229648 |
| rs6043648 | 20 C | 0.4899 | -0.0548 | 0.0002723 | 0.39628035 |
| rs606568  | 13 T | 0.8263 | -0.0699 | 0.0005102 | 0.97382053 |
| rs606590  | 18 C | 0.6032 | 0.053   | 0.000973  | 0.14974508 |
| rs6069957 | 20 G | 0.9223 | -0.0953 | 0.0006254 | 0.0678322  |
| rs6071459 | 20 C | 0.6794 | 0.066   | 4.53E-05  | 0.49865138 |
| rs6072001 | 20 G | 0.6833 | 0.0649  | 6.76E-05  | 0.5070496  |
| rs6077681 | 20 T | 0.9016 | -0.0868 | 0.0008619 | 0.47776892 |
| rs6090338 | 20 A | 0.7435 | -0.0573 | 0.0009174 | 0.38402347 |
| rs6095640 | 20 G | 0.9744 | 0.1669  | 0.0009443 | NA         |
| rs610232  | 18 T | 0.0765 | 0.0996  | 0.0004026 | 0.68900117 |
| rs6131753 | 20 T | 0.7148 | -0.0633 | 0.0006389 | 0.06963096 |
| rs6135624 | 20 G | 0.7401 | -0.0624 | 0.0009826 | 0.1119337  |
| rs6135626 | 20 G | 0.8132 | -0.0742 | 0.0001446 | 0.00626765 |
| rs616104  | 8 C  | 0.0891 | 0.0904  | 0.0006627 | 0.34104969 |
| rs617363  | 1 T  | 0.6179 | -0.0563 | 0.0002925 | 0.02953663 |
| rs619508  | 13 T | 0.8243 | -0.0691 | 0.0005606 | 0.74883675 |
| rs621222  | 1 T  | 0.7305 | -0.0774 | 2.85E-05  | 0.69276162 |
| rs636234  | 6 C  | 0.4323 | -0.0603 | 8.06E-05  | 0.05756305 |
| rs637033  | 5 G  | 0.5058 | 0.0593  | 0.0001124 | 0.16748578 |
| rs6430331 | 2 G  | 0.9197 | -0.0935 | 0.0009488 | 0.77579536 |
| rs6434799 | 2 C  | 0.263  | -0.0703 | 4.97E-05  | 0.65850707 |
| rs6434802 | 2 C  | 0.2659 | -0.069  | 6.81E-05  | 0.69554224 |
| rs6440716 | 3 G  | 0.9306 | 0.1253  | 9.61E-05  | 0.69303113 |
| rs6454976 | 6 G  | 0.4476 | -0.0534 | 0.0005084 | 0.63386992 |
| rs6461718 | 7 G  | 0.2449 | -0.0598 | 0.0006568 | 0.6443347  |
| rs6475895 | 9 A  | 0.9183 | 0.0967  | 0.0004312 | 0.27599906 |
| rs6496210 | 15 T | 0.5487 | -0.0629 | 9.83E-05  | 0.9657616  |
| rs6502440 | 17 G | 0.6764 | 0.0554  | 0.0006848 | 0.14978768 |
| rs6512238 | 19 C | 0.3729 | 0.0589  | 0.0001445 | 0.24546367 |
| rs6543288 | 2 G  | 0.5895 | -0.0534 | 0.0005319 | 0.52975588 |
| rs6544389 | 2 T  | 0.5101 | 0.0605  | 8.47E-05  | 0.25937618 |
| rs6548690 | 3 C  | 0.1278 | -0.0841 | 0.0003419 | 0.33705332 |

|           |      |        |         |           |            |
|-----------|------|--------|---------|-----------|------------|
| rs6548843 | 3 T  | 0.4246 | 0.055   | 0.0003522 | 0.42362428 |
| rs6548846 | 3 C  | 0.3581 | 0.0569  | 0.0003736 | 0.22738829 |
| rs6563655 | 13 C | 0.7744 | -0.0608 | 0.0008288 | 0.77987772 |
| rs6563658 | 13 G | 0.7744 | -0.0608 | 0.0008287 | 0.79851909 |
| rs658853  | 9 G  | 0.6845 | 0.0532  | 0.000989  | 0.32891887 |
| rs659991  | 13 G | 0.826  | -0.0695 | 0.0005218 | 0.89357749 |
| rs6602301 | 10 C | 0.5854 | 0.0517  | 0.0008526 | 0.83616199 |
| rs662774  | 7 A  | 0.3858 | -0.0553 | 0.0005892 | 0.88907281 |
| rs6687999 | 1 G  | 0.933  | -0.1098 | 0.0002955 | 0.74615757 |
| rs6706771 | 2 G  | 0.2582 | -0.0685 | 9.00E-05  | 0.64263609 |
| rs6708730 | 2 C  | 0.6734 | 0.0563  | 0.0004898 | 0.68829571 |
| rs6710605 | 2 T  | 0.5174 | -0.062  | 4.97E-05  | 0.33536245 |
| rs6713330 | 2 G  | 0.507  | -0.0571 | 0.0001737 | 0.18030648 |
| rs6723899 | 2 T  | 0.6737 | 0.0559  | 0.0005358 | 0.68743017 |
| rs6725814 | 2 G  | 0.392  | -0.0538 | 0.0005269 | 0.69931432 |
| rs6730730 | 2 A  | 0.8821 | 0.08    | 0.0007431 | 0.47150725 |
| rs673330  | 11 A | 0.8436 | -0.0771 | 0.0002384 | 0.55712007 |
| rs673429  | 18 T | 0.9352 | 0.1077  | 0.0005065 | 0.20936862 |
| rs6738207 | 2 G  | 0.5999 | -0.0579 | 0.0001811 | 0.61995661 |
| rs6743998 | 2 T  | 0.2588 | -0.0673 | 0.0001218 | 0.71322342 |
| rs6744481 | 2 A  | 0.8929 | 0.0836  | 0.0005173 | 0.88973078 |
| rs6753046 | 2 G  | 0.5895 | -0.0535 | 0.0005026 | 0.50880671 |
| rs6756374 | 2 C  | 0.2584 | -0.0679 | 0.0001037 | 0.64276681 |
| rs6764992 | 3 T  | 0.8825 | -0.0896 | 0.0001724 | 0.08118536 |
| rs6772446 | 3 A  | 0.9619 | 0.1304  | 0.0009635 | 0.14106033 |
| rs6779450 | 3 T  | 0.2041 | 0.0691  | 0.0001992 | 0.76553594 |
| rs6783510 | 3 A  | 0.4261 | 0.0536  | 0.0004789 | 0.43036049 |
| rs679884  | 18 C | 0.6578 | 0.0581  | 0.0002279 | 0.94114467 |
| rs681422  | 5 T  | 0.0869 | 0.0987  | 0.0002266 | 0.18949816 |
| rs6822371 | 4 C  | 0.6577 | -0.0547 | 0.0006733 | 0.16840035 |
| rs6824643 | 4 G  | 0.6152 | 0.0563  | 0.0003015 | 0.52915715 |
| rs6825793 | 4 G  | 0.6596 | -0.0574 | 0.0003416 | 0.43445725 |
| rs6829701 | 4 G  | 0.6709 | 0.0648  | 5.28E-05  | 0.35238663 |
| rs6834257 | 4 A  | 0.2179 | 0.062   | 0.0005473 | 0.96708594 |
| rs6845983 | 4 G  | 0.9476 | 0.1254  | 0.0002457 | 0.0915363  |
| rs6847325 | 4 G  | 0.8976 | -0.083  | 0.0008291 | 0.81059767 |
| rs6851312 | 4 A  | 0.6146 | 0.0563  | 0.000303  | 0.53184423 |
| rs6863278 | 5 G  | 0.9349 | -0.1163 | 0.0001811 | 0.95924208 |
| rs6866246 | 5 G  | 0.8391 | 0.0757  | 0.0002619 | 0.95046778 |
| rs6871146 | 5 G  | 0.8419 | 0.0729  | 0.0005057 | 0.10482614 |
| rs6872312 | 5 G  | 0.8777 | 0.0963  | 3.89E-05  | 0.62098682 |

|           |      |        |         |           |            |
|-----------|------|--------|---------|-----------|------------|
| rs6873939 | 5 C  | 0.9371 | -0.1174 | 0.0001991 | 0.93346896 |
| rs6882823 | 5 T  | 0.32   | -0.0591 | 0.0003328 | 0.59856652 |
| rs6885417 | 5 G  | 0.8787 | 0.0946  | 5.27E-05  | 0.53790337 |
| rs6887003 | 5 C  | 0.1904 | -0.0645 | 0.0007535 | 0.69112468 |
| rs689848  | 11 T | 0.2054 | -0.0701 | 0.0002662 | 0.55987248 |
| rs6901785 | 6 T  | 0.4476 | -0.0534 | 0.0005091 | 0.64372002 |
| rs6927133 | 6 A  | 0.9325 | -0.1087 | 0.0003707 | 0.74912782 |
| rs6928545 | 6 A  | 0.6939 | 0.058   | 0.0005589 | 0.37258574 |
| rs6940021 | 6 G  | 0.5268 | 0.0543  | 0.0003945 | 0.66999229 |
| rs6947017 | 7 G  | 0.0929 | -0.0991 | 0.0001477 | 0.54969549 |
| rs6950574 | 7 A  | 0.7013 | -0.0546 | 0.0008848 | 0.58634991 |
| rs6950973 | 7 A  | 0.3224 | 0.0651  | 6.97E-05  | 0.43181416 |
| rs6957022 | 7 T  | 0.622  | 0.054   | 0.0005842 | 0.3878271  |
| rs6967408 | 7 A  | 0.3205 | 0.0656  | 6.26E-05  | 0.50235939 |
| rs6967507 | 7 T  | 0.6962 | 0.056   | 0.0006909 | 0.74240753 |
| rs697635  | 12 G | 0.6729 | -0.0553 | 0.00067   | 0.38779476 |
| rs6987678 | 8 C  | 0.7185 | -0.0602 | 0.0003078 | 0.71347119 |
| rs6990230 | 8 A  | 0.8027 | -0.0665 | 0.0005188 | 0.23116514 |
| rs6998032 | 8 C  | 0.7751 | -0.0642 | 0.0003616 | 0.70456834 |
| rs7013730 | 8 T  | 0.7272 | 0.059   | 0.0004992 | 0.63890609 |
| rs7030789 | 9 A  | 0.3176 | 0.062   | 0.0001491 | 0.61002705 |
| rs7036586 | 9 T  | 0.9819 | -0.1922 | 0.0007878 | NA         |
| rs7042444 | 9 A  | 0.6047 | 0.0543  | 0.0005159 | 0.56667438 |
| rs7075197 | 10 T | 0.7859 | 0.0645  | 0.0006257 | 0.40037056 |
| rs7078039 | 10 C | 0.2584 | 0.0708  | 4.18E-05  | 0.20486594 |
| rs7082651 | 10 T | 0.585  | 0.052   | 0.0007906 | 0.81717    |
| rs7089898 | 10 C | 0.7858 | 0.0632  | 0.0008317 | 0.3901759  |
| rs7095016 | 10 G | 0.7751 | 0.0618  | 0.0008957 | 0.98854763 |
| rs711714  | 3 T  | 0.8706 | 0.0785  | 0.0006795 | 0.58784004 |
| rs711715  | 3 A  | 0.7932 | 0.0646  | 0.0006745 | 0.71492074 |
| rs711716  | 3 C  | 0.7932 | 0.0646  | 0.0006726 | 0.70967985 |
| rs7120021 | 11 G | 0.6214 | 0.0557  | 0.0002804 | 0.69741066 |
| rs7121722 | 11 T | 0.8114 | 0.068   | 0.0005548 | 0.74828111 |
| rs7160649 | 14 C | 0.68   | -0.0559 | 0.0006618 | 0.2647391  |
| rs716710  | 5 G  | 0.3396 | -0.0565 | 0.0004859 | 0.18791213 |
| rs716866  | 5 G  | 0.4391 | 0.0531  | 0.000528  | 0.33091971 |
| rs7176006 | 15 T | 0.597  | 0.0518  | 0.00089   | 0.73377252 |
| rs7178681 | 15 G | 0.8931 | -0.0902 | 0.000326  | 0.16436384 |
| rs7185798 | 16 C | 0.2758 | -0.06   | 0.0004901 | 0.42256841 |
| rs7193972 | 16 A | 0.4494 | 0.0579  | 0.0001153 | 0.52220507 |
| rs7196364 | 16 G | 0.8347 | -0.0677 | 0.0009766 | 0.81066391 |

|           |      |        |         |           |            |
|-----------|------|--------|---------|-----------|------------|
| rs7198251 | 16 A | 0.8287 | -0.0699 | 0.0005384 | 0.86765651 |
| rs720644  | 15 A | 0.6052 | 0.052   | 0.0009358 | 0.67433076 |
| rs7209407 | 17 G | 0.6615 | 0.0611  | 0.000138  | 0.14305478 |
| rs7209748 | 17 G | 0.6652 | 0.0569  | 0.0004175 | 0.13865242 |
| rs7213173 | 17 G | 0.6756 | 0.0568  | 0.0004565 | 0.15162733 |
| rs7213463 | 17 A | 0.7896 | 0.0623  | 0.0007375 | 0.22731257 |
| rs7215091 | 17 C | 0.86   | -0.0746 | 0.0006528 | 0.73938965 |
| rs7221943 | 17 C | 0.9471 | 0.1152  | 0.0006086 | 0.87200666 |
| rs7237247 | 18 T | 0.8716 | 0.0788  | 0.0004626 | 0.79132358 |
| rs7250332 | 19 T | 0.3714 | 0.0584  | 0.0001553 | 0.24723723 |
| rs7252434 | 19 A | 0.4568 | 0.0506  | 0.0008146 | 0.66420703 |
| rs7260222 | 19 C | 0.6585 | -0.0621 | 0.0001313 | 0.02476796 |
| rs727276  | 1 T  | 0.9682 | -0.1728 | 8.43E-05  | 0.15682798 |
| rs7276817 | 21 G | 0.8009 | 0.0659  | 0.0005093 | 0.56347884 |
| rs7278642 | 21 G | 0.4667 | -0.0519 | 0.0008235 | 0.54819819 |
| rs7298683 | 12 G | 0.0396 | -0.1341 | 0.0006553 | 0.36952204 |
| rs7303030 | 12 A | 0.7735 | -0.0638 | 0.0004715 | 0.16249066 |
| rs7303111 | 12 G | 0.7741 | -0.0634 | 0.0005185 | 0.1536084  |
| rs7313855 | 12 A | 0.8723 | -0.0797 | 0.0004861 | 0.524371   |
| rs7314280 | 12 C | 0.8346 | -0.0815 | 5.60E-05  | 0.79549066 |
| rs731703  | 11 G | 0.6888 | 0.0544  | 0.0009747 | 0.82118004 |
| rs731773  | 19 T | 0.6833 | 0.0748  | 6.02E-06  | 0.20720926 |
| rs7318687 | 13 G | 0.3846 | -0.0533 | 0.0007466 | 0.83369267 |
| rs7318895 | 13 T | 0.6864 | 0.0552  | 0.0006922 | 0.90256019 |
| rs7321102 | 13 C | 0.7654 | 0.0605  | 0.0007278 | 0.03204694 |
| rs7323023 | 13 A | 0.7744 | -0.0608 | 0.0008297 | 0.8025763  |
| rs7324010 | 13 A | 0.4291 | 0.0531  | 0.0004484 | 0.67028714 |
| rs7324069 | 13 C | 0.6334 | 0.0538  | 0.0005425 | 0.34557195 |
| rs7327483 | 13 C | 0.7367 | 0.0595  | 0.0006367 | 0.58146195 |
| rs7330236 | 13 T | 0.7744 | -0.0608 | 0.0008288 | 0.78416119 |
| rs7336995 | 13 T | 0.6864 | 0.0552  | 0.0006942 | 0.90167026 |
| rs7349532 | 3 C  | 0.7816 | -0.0667 | 0.0007695 | 0.6137732  |
| rs736095  | 5 G  | 0.9611 | -0.1417 | 0.0004106 | 0.16313107 |
| rs737769  | 22 T | 0.8982 | 0.1087  | 1.58E-05  | 0.50218543 |
| rs7424415 | 2 T  | 0.2587 | -0.0683 | 9.53E-05  | 0.66131031 |
| rs744668  | 1 C  | 0.1638 | -0.0701 | 0.0006539 | 0.68510081 |
| rs746187  | 13 A | 0.6102 | 0.0534  | 0.0007057 | 0.97108058 |
| rs748328  | 1 C  | 0.1862 | 0.0686  | 0.000508  | 0.61348598 |
| rs7504590 | 18 T | 0.7166 | 0.0577  | 0.000537  | 0.62033555 |
| rs755326  | 19 T | 0.9508 | 0.1444  | 3.55E-05  | 0.11948748 |
| rs755517  | 4 C  | 0.2944 | -0.0555 | 0.0008306 | 0.56546336 |

|           |      |        |         |           |            |
|-----------|------|--------|---------|-----------|------------|
| rs7561156 | 2 A  | 0.9207 | -0.0961 | 0.0005776 | 0.38134746 |
| rs7562658 | 2 A  | 0.4942 | 0.0612  | 6.36E-05  | 0.28658641 |
| rs7567189 | 2 G  | 0.5178 | 0.0608  | 5.55E-05  | 0.30943334 |
| rs7580284 | 2 C  | 0.5574 | 0.0525  | 0.000657  | 0.30061732 |
| rs7592750 | 2 C  | 0.8485 | -0.0818 | 0.0003239 | 0.36494123 |
| rs7596016 | 2 T  | 0.2658 | -0.069  | 6.81E-05  | 0.65760664 |
| rs7598263 | 2 T  | 0.6903 | -0.0604 | 0.000217  | 0.45964803 |
| rs7598800 | 2 T  | 0.4536 | -0.0511 | 0.0006711 | 0.23921214 |
| rs7598906 | 2 T  | 0.4538 | -0.0514 | 0.0006276 | 0.23981893 |
| rs7603001 | 2 A  | 0.4649 | -0.0519 | 0.0006621 | 0.69131349 |
| rs7603249 | 2 C  | 0.843  | -0.0752 | 0.0002886 | 0.14500143 |
| rs7605382 | 2 T  | 0.4917 | 0.0621  | 5.32E-05  | 0.28755048 |
| rs7623750 | 3 G  | 0.6848 | -0.0548 | 0.0007251 | 0.30066046 |
| rs7627904 | 3 C  | 0.6849 | -0.0537 | 0.000919  | 0.2843196  |
| rs7634663 | 3 T  | 0.9331 | 0.1157  | 0.0001406 | 0.74878764 |
| rs7639667 | 3 C  | 0.4231 | 0.0567  | 0.0002257 | 0.47094784 |
| rs7639998 | 3 G  | 0.4232 | 0.057   | 0.0002098 | 0.45337753 |
| rs7660477 | 4 C  | 0.5315 | 0.0547  | 0.0002815 | 0.13584781 |
| rs766103  | 15 C | 0.495  | -0.0577 | 0.000118  | 0.31784308 |
| rs7671181 | 4 T  | 0.7672 | -0.0594 | 0.000834  | 0.62550866 |
| rs7680473 | 4 T  | 0.8829 | -0.0863 | 0.0004176 | 0.74237142 |
| rs7691720 | 4 A  | 0.884  | -0.0837 | 0.0004824 | 0.78269488 |
| rs7720858 | 5 C  | 0.9827 | -0.2075 | 0.0003143 | NA         |
| rs7726283 | 5 T  | 0.3389 | 0.0583  | 0.0002786 | 0.73356332 |
| rs7726844 | 5 G  | 0.6011 | 0.0538  | 0.0006219 | 0.06778991 |
| rs7736548 | 5 G  | 0.4438 | 0.0515  | 0.0007669 | 0.9597984  |
| rs7742896 | 6 C  | 0.8581 | -0.0726 | 0.0009298 | 0.49370409 |
| rs7746249 | 6 C  | 0.4956 | -0.051  | 0.0008269 | 0.68866129 |
| rs7760665 | 6 G  | 0.6487 | -0.0552 | 0.0005189 | 0.86908055 |
| rs7770341 | 6 A  | 0.9595 | -0.1373 | 0.0002952 | 0.90098361 |
| rs7783688 | 7 C  | 0.0687 | -0.0993 | 0.0008799 | 0.32711721 |
| rs778554  | 4 T  | 0.5535 | 0.052   | 0.0006099 | 0.29955021 |
| rs7791283 | 7 T  | 0.7491 | -0.06   | 0.00058   | 0.49644085 |
| rs7796934 | 7 G  | 0.6235 | 0.0535  | 0.000683  | 0.42424026 |
| rs7799246 | 7 T  | 0.7723 | -0.0597 | 0.0009112 | 0.57882384 |
| rs7804751 | 7 A  | 0.6491 | -0.0557 | 0.0005004 | 0.96465334 |
| rs7809567 | 7 T  | 0.32   | 0.0663  | 5.22E-05  | 0.50460701 |
| rs7810052 | 7 T  | 0.3201 | 0.0663  | 5.26E-05  | 0.50063616 |
| rs7820543 | 8 A  | 0.616  | -0.0537 | 0.0005151 | 0.86942502 |
| rs7821860 | 8 G  | 0.5211 | -0.0512 | 0.0007584 | 0.22160654 |
| rs7829101 | 8 A  | 0.6273 | -0.0527 | 0.0008248 | 0.86051612 |



|           |      |        |         |           |            |
|-----------|------|--------|---------|-----------|------------|
| rs7849719 | 9 G  | 0.7936 | 0.0635  | 0.0007145 | 0.1536448  |
| rs7853148 | 9 T  | 0.3729 | 0.0531  | 0.000799  | 0.61702332 |
| rs7862893 | 9 C  | 0.7017 | -0.0607 | 0.0005005 | 0.84770977 |
| rs7900830 | 10 G | 0.7796 | 0.0628  | 0.0005062 | 0.03322488 |
| rs790328  | 13 G | 0.2657 | -0.0705 | 3.25E-05  | 0.96875803 |
| rs790330  | 13 C | 0.3666 | -0.0538 | 0.0005427 | 0.32327563 |
| rs790346  | 11 T | 0.7522 | 0.0581  | 0.0008413 | 0.75746857 |
| rs7911801 | 10 A | 0.8797 | -0.0861 | 0.0002178 | 0.7408105  |
| rs7926308 | 11 T | 0.8189 | -0.0709 | 0.0003593 | 0.12544033 |
| rs7926428 | 11 C | 0.8706 | -0.1057 | 1.18E-05  | 0.79995289 |
| rs7931324 | 11 C | 0.9076 | -0.0934 | 0.0003927 | 0.67534216 |
| rs7937452 | 11 C | 0.8676 | -0.0832 | 0.0001805 | 0.66004845 |
| rs7939737 | 11 G | 0.9436 | -0.1613 | 3.09E-06  | 0.3635564  |
| rs794861  | 6 C  | 0.2466 | 0.0593  | 0.0006251 | 0.8705805  |
| rs7949336 | 11 A | 0.7395 | -0.06   | 0.0005431 | 0.06510006 |
| rs7955810 | 12 T | 0.8345 | -0.0815 | 5.71E-05  | 0.79549806 |
| rs7966190 | 12 C | 0.8345 | -0.0816 | 5.48E-05  | 0.79549806 |
| rs7969052 | 12 C | 0.8458 | -0.0813 | 9.15E-05  | 0.1890703  |
| rs7981720 | 13 T | 0.8198 | 0.0681  | 0.0004485 | 0.12995947 |
| rs7982295 | 13 C | 0.6327 | 0.0536  | 0.0005664 | 0.33020794 |
| rs7984412 | 13 G | 0.7744 | -0.0608 | 0.0008317 | 0.77152958 |
| rs7986033 | 13 C | 0.7743 | -0.0605 | 0.0008843 | 0.77141409 |
| rs7993004 | 13 A | 0.6799 | 0.0562  | 0.000717  | 0.23646447 |
| rs7993465 | 13 A | 0.609  | 0.0542  | 0.0004871 | 0.90635086 |
| rs8002991 | 13 C | 0.6877 | 0.0539  | 0.0009099 | 0.93560113 |
| rs8003773 | 14 C | 0.8115 | -0.0675 | 0.0003805 | 0.52305878 |
| rs8014186 | 14 T | 0.0704 | 0.104   | 0.0005739 | 0.35350356 |
| rs8020153 | 14 C | 0.0717 | 0.1014  | 0.0006794 | 0.25508174 |
| rs8024985 | 15 A | 0.3464 | 0.0582  | 0.0002565 | 0.87638528 |
| rs8033375 | 15 T | 0.8708 | -0.0995 | 1.75E-05  | 0.00928107 |
| rs8046133 | 16 A | 0.9228 | 0.0962  | 0.0006741 | 0.37024115 |
| rs8054180 | 16 C | 0.3685 | 0.0553  | 0.000531  | 0.24969059 |
| rs8063973 | 16 G | 0.7161 | 0.059   | 0.0004369 | 0.27309584 |
| rs8064150 | 16 A | 0.1902 | -0.0726 | 0.0001483 | 0.59129742 |
| rs8065820 | 17 G | 0.9139 | -0.0928 | 0.0008505 | 0.7800024  |
| rs8068673 | 17 T | 0.6627 | 0.0613  | 0.0001389 | 0.14210178 |
| rs8072459 | 17 A | 0.317  | 0.0568  | 0.0007635 | 0.59911012 |
| rs8080801 | 17 T | 0.9469 | 0.1141  | 0.0006379 | 0.82732608 |
| rs8083213 | 18 A | 0.2173 | -0.063  | 0.0006777 | 0.2065998  |
| rs8085058 | 18 T | 0.6864 | -0.0605 | 0.0002206 | 0.0720509  |
| rs8092564 | 18 C | 0.2629 | 0.0615  | 0.0006739 | 0.28238405 |

|           |      |        |         |           |            |
|-----------|------|--------|---------|-----------|------------|
| rs8097669 | 18 C | 0.3438 | 0.0747  | 7.67E-06  | 0.91948511 |
| rs8099053 | 18 A | 0.6106 | -0.0552 | 0.0004267 | 0.21221804 |
| rs8099574 | 18 G | 0.5561 | 0.0625  | 4.41E-05  | 0.5561676  |
| rs8100988 | 19 C | 0.2961 | 0.0664  | 6.30E-05  | 0.36174529 |
| rs8123772 | 20 A | 0.9467 | -0.114  | 0.0008963 | 0.56673551 |
| rs8130856 | 21 A | 0.9435 | -0.1263 | 0.000146  | 0.65226565 |
| rs8139515 | 22 A | 0.8392 | 0.0701  | 0.0007898 | 0.10119612 |
| rs8139784 | 22 G | 0.8409 | 0.0722  | 0.0005805 | 0.09391363 |
| rs827423  | 6 G  | 0.4911 | 0.0547  | 0.0002657 | 0.75171313 |
| rs830383  | 5 A  | 0.3818 | -0.0671 | 1.89E-05  | 0.11186992 |
| rs8339    | 18 G | 0.8938 | 0.0836  | 0.0006651 | 0.69937928 |
| rs842740  | 2 C  | 0.7593 | 0.0676  | 0.0001567 | 0.49328461 |
| rs858027  | 21 A | 0.0701 | 0.1091  | 0.0002625 | 0.26640337 |
| rs860798  | 21 C | 0.6096 | -0.0519 | 0.000811  | 0.7050256  |
| rs873116  | 2 C  | 0.674  | 0.0565  | 0.000503  | 0.66525889 |
| rs881210  | 11 G | 0.6074 | -0.0525 | 0.0008025 | 0.44865777 |
| rs885691  | 17 T | 0.1947 | 0.0632  | 0.000963  | 0.84047114 |
| rs894445  | 11 A | 0.0883 | 0.1026  | 0.0002232 | 0.44828153 |
| rs898614  | 11 C | 0.3571 | -0.0577 | 0.0002738 | 0.30743927 |
| rs898935  | 2 C  | 0.7402 | 0.067   | 0.0001207 | 0.54435791 |
| rs907141  | 2 C  | 0.3449 | 0.0553  | 0.0007203 | 0.78592049 |
| rs909934  | 1 G  | 0.2024 | 0.064   | 0.0007428 | 0.09777298 |
| rs911158  | 20 A | 0.4964 | 0.0511  | 0.0007247 | 0.04715579 |
| rs918042  | 12 A | 0.7788 | -0.0678 | 0.0002321 | 0.39102276 |
| rs918043  | 12 C | 0.7774 | -0.0689 | 0.0001798 | 0.39100894 |
| rs923307  | 4 A  | 0.1821 | -0.0659 | 0.0007498 | 0.78518155 |
| rs923345  | 3 A  | 0.5942 | 0.0562  | 0.0002322 | 0.81749142 |
| rs928738  | 21 G | 0.8578 | 0.077   | 0.0003314 | 0.21681755 |
| rs9290607 | 3 A  | 0.8602 | -0.0861 | 0.0003627 | 0.81057175 |
| rs9292877 | 5 C  | 0.9701 | -0.1658 | 0.0001651 | 0.34477287 |
| rs9301973 | 13 G | 0.6864 | 0.055   | 0.0007298 | 0.62167315 |
| rs9305055 | 19 T | 0.308  | -0.0582 | 0.0003854 | 0.37573696 |
| rs9305623 | 21 C | 0.4063 | 0.0506  | 0.0009858 | 0.83716437 |
| rs9309807 | 3 A  | 0.5665 | 0.0508  | 0.0009359 | 0.42215669 |
| rs9315892 | 13 G | 0.8411 | -0.0719 | 0.0004651 | 0.6495423  |
| rs9316890 | 13 G | 0.6334 | 0.0538  | 0.0005425 | 0.40985133 |
| rs9316891 | 13 C | 0.6334 | 0.0538  | 0.0005424 | 0.33854416 |
| rs9318385 | 13 A | 0.4421 | 0.0538  | 0.0005862 | 0.49304897 |
| rs9318386 | 13 C | 0.4438 | 0.0515  | 0.0007919 | 0.50975763 |
| rs9318387 | 13 C | 0.4438 | 0.0514  | 0.0007936 | 0.51215684 |
| rs9320692 | 6 A  | 0.8471 | 0.0694  | 0.000913  | 0.03540598 |

|           |      |        |         |           |            |
|-----------|------|--------|---------|-----------|------------|
| rs9325627 | 21 T | 0.6734 | 0.0534  | 0.0008455 | 0.72412218 |
| rs9345388 | 6 A  | 0.4466 | -0.0538 | 0.0004715 | 0.64009631 |
| rs9363105 | 6 A  | 0.4476 | -0.0534 | 0.0005085 | 0.64421217 |
| rs9363305 | 6 A  | 0.6493 | -0.053  | 0.0008775 | 0.86908055 |
| rs9367114 | 6 C  | 0.5663 | -0.0658 | 1.54E-05  | 0.62311032 |
| rs9372625 | 6 G  | 0.6196 | -0.0521 | 0.0009771 | 0.40436674 |
| rs9398235 | 6 G  | 0.8268 | -0.0674 | 0.0009632 | 0.45987421 |
| rs9405967 | 6 C  | 0.7209 | 0.0579  | 0.0007317 | 0.68580369 |
| rs941650  | 14 T | 0.2752 | -0.0602 | 0.0004681 | 0.05492441 |
| rs946440  | 6 G  | 0.8277 | 0.0663  | 0.0009519 | 0.55160495 |
| rs9471684 | 6 T  | 0.6504 | 0.0648  | 4.41E-05  | 0.55504421 |
| rs9471712 | 6 C  | 0.599  | 0.0668  | 1.20E-05  | 0.98887485 |
| rs9507268 | 13 G | 0.4446 | 0.053   | 0.000687  | 0.47597741 |
| rs9511125 | 13 C | 0.4449 | 0.0527  | 0.0007482 | 0.47487997 |
| rs9511127 | 13 G | 0.445  | 0.0524  | 0.0007854 | 0.48149988 |
| rs9511130 | 13 T | 0.4465 | 0.0519  | 0.0008752 | 0.50068791 |
| rs9511137 | 13 G | 0.4403 | 0.0524  | 0.0006683 | 0.49967262 |
| rs9527585 | 13 A | 0.6334 | 0.0538  | 0.0005428 | 0.32254957 |
| rs9545827 | 13 A | 0.7296 | -0.0581 | 0.0007485 | 0.1424374  |
| rs9545828 | 13 A | 0.8399 | -0.0695 | 0.0008792 | 0.506619   |
| rs9553509 | 13 A | 0.9407 | 0.1355  | 0.0001187 | 0.40851978 |
| rs9553516 | 13 C | 0.9439 | 0.1284  | 0.0004719 | 0.43757516 |
| rs9561607 | 13 A | 0.6865 | 0.0552  | 0.0007043 | 0.87871899 |
| rs9561619 | 13 C | 0.6866 | 0.0554  | 0.0006854 | 0.90681637 |
| rs9563481 | 13 C | 0.8271 | 0.074   | 0.0002113 | 0.56982154 |
| rs9563483 | 13 T | 0.8278 | 0.0711  | 0.000364  | 0.55716761 |
| rs9563495 | 13 C | 0.8209 | 0.0663  | 0.0006613 | 0.11595938 |
| rs9563497 | 13 T | 0.8191 | 0.0669  | 0.0005574 | 0.12991244 |
| rs9563502 | 13 A | 0.7176 | 0.056   | 0.0007989 | 0.02209747 |
| rs9569579 | 13 G | 0.8284 | 0.0792  | 7.27E-05  | 0.72865166 |
| rs9569580 | 13 C | 0.6333 | 0.0533  | 0.0006134 | 0.34820225 |
| rs9569612 | 13 A | 0.8305 | 0.0737  | 0.0002475 | 0.72382271 |
| rs9569633 | 13 C | 0.8262 | 0.0783  | 9.43E-05  | 0.59063131 |
| rs9569670 | 13 C | 0.8209 | 0.0663  | 0.0006613 | 0.12239702 |
| rs9569676 | 13 T | 0.7176 | 0.056   | 0.0007989 | 0.02194657 |
| rs9572018 | 13 A | 0.6796 | 0.0563  | 0.0006725 | 0.25815028 |
| rs9572205 | 13 T | 0.6882 | 0.0546  | 0.0008699 | 0.48927549 |
| rs9574199 | 13 C | 0.6919 | -0.0565 | 0.0006431 | 0.72628739 |
| rs9580831 | 13 C | 0.9673 | -0.1455 | 0.0008974 | 0.22029595 |
| rs9590023 | 13 T | 0.6446 | -0.0547 | 0.0006141 | 0.11459351 |
| rs9590679 | 13 T | 0.8132 | -0.0673 | 0.0006553 | 0.7244793  |

|           |      |        |         |           |            |
|-----------|------|--------|---------|-----------|------------|
| rs9594683 | 13 A | 0.8411 | -0.0721 | 0.0004591 | 0.63920835 |
| rs9594685 | 13 G | 0.8411 | -0.0721 | 0.0004589 | 0.64977294 |
| rs9594703 | 13 A | 0.8397 | -0.0748 | 0.0002767 | 0.61094758 |
| rs9594709 | 13 C | 0.8391 | -0.0752 | 0.0002472 | 0.54474857 |
| rs9603485 | 13 A | 0.7744 | -0.0608 | 0.0008287 | 0.77156614 |
| rs961050  | 13 G | 0.3835 | -0.0517 | 0.0008333 | 0.31698373 |
| rs9612797 | 22 A | 0.8617 | 0.1028  | 2.53E-06  | 0.77302254 |
| rs9624632 | 22 A | 0.8981 | 0.1086  | 1.41E-05  | 0.64351519 |
| rs963458  | 6 A  | 0.8441 | 0.0719  | 0.0005189 | 0.04078185 |
| rs9635884 | 18 A | 0.3437 | 0.0733  | 1.13E-05  | 0.91890373 |
| rs9639128 | 7 G  | 0.8085 | -0.0697 | 0.0003144 | 0.26634383 |
| rs963964  | 2 G  | 0.6899 | -0.0589 | 0.0002993 | 0.4378142  |
| rs964039  | 11 C | 0.2808 | 0.0661  | 0.0004211 | 0.82754609 |
| rs9648158 | 7 G  | 0.8075 | -0.0687 | 0.0003506 | 0.25028184 |
| rs965561  | 5 A  | 0.5544 | 0.0523  | 0.0006883 | 0.11251866 |
| rs9732147 | 10 A | 0.7782 | 0.0631  | 0.0004632 | 0.03318826 |
| rs973431  | 4 G  | 0.659  | -0.0569 | 0.0003782 | 0.56759171 |
| rs975809  | 10 G | 0.4865 | 0.0568  | 0.0001384 | 0.43504989 |
| rs9787810 | 11 C | 0.6877 | 0.0551  | 0.0008094 | 0.80722498 |
| rs9824693 | 3 C  | 0.5496 | -0.0525 | 0.000633  | 0.03107895 |
| rs9833515 | 3 T  | 0.9332 | 0.1166  | 0.0001375 | 0.75911447 |
| rs987452  | 5 C  | 0.8602 | 0.0852  | 0.0001099 | 0.64386196 |
| rs9882017 | 3 G  | 0.4449 | -0.0563 | 0.0007599 | 0.3308538  |
| rs9882192 | 3 A  | 0.5484 | -0.0512 | 0.0008079 | 0.03490839 |
| rs9883093 | 3 T  | 0.3592 | 0.0553  | 0.0005497 | 0.22537689 |
| rs9883719 | 3 T  | 0.425  | 0.056   | 0.00027   | 0.43031612 |
| rs989587  | 5 T  | 0.5549 | 0.0522  | 0.0006847 | 0.11734104 |
| rs9898364 | 17 A | 0.912  | -0.1011 | 0.0001927 | 0.6792477  |
| rs9905316 | 17 A | 0.9121 | -0.1008 | 0.0002063 | 0.67925899 |
| rs9905797 | 17 C | 0.6722 | 0.0592  | 0.0002574 | 0.14384811 |
| rs9913386 | 17 T | 0.8947 | 0.0849  | 0.0006529 | 0.48332526 |
| rs9915163 | 17 C | 0.9021 | 0.0932  | 0.0003045 | 0.6828899  |
| rs9921866 | 16 T | 0.4756 | 0.0571  | 0.0001429 | 0.58579076 |
| rs9940714 | 16 A | 0.7185 | 0.0605  | 0.0003352 | 0.55120741 |
| rs9945379 | 18 A | 0.4948 | 0.0536  | 0.000579  | 0.19909199 |
| rs9947697 | 18 A | 0.8506 | 0.0737  | 0.0005977 | 0.67788869 |
| rs9949710 | 18 T | 0.6802 | -0.0818 | 8.37E-07  | 0.39278497 |
| rs9959828 | 18 G | 0.5558 | 0.0641  | 2.91E-05  | 0.5561676  |
| rs9992816 | 4 C  | 0.8976 | -0.0831 | 0.0008275 | 0.80732325 |

ts were the Virginia Twin Study on Adolescent Behavioral  
Smokey Mountain Study (GSMS). Columns at\_p, ct\_p, and gt\_p  
nbined per Fisher's method.

| ed t-statistic p-value |            |             | Fisher's method p-value |            |            |
|------------------------|------------|-------------|-------------------------|------------|------------|
| CHDS                   | GSMS       | All samples | VTSABD                  | CHDS       | GSMS       |
| 0.44395769             | 0.41075024 | 0.02551075  | 0.00706533              | 0.00367685 | 0.00343196 |
| 0.28311329             | 0.57802182 | 0.00329811  | 0.00064632              | 0.00074578 | 0.00141969 |
| 0.34710712             | 0.53722833 | 0.00294281  | 0.00050143              | 0.00285986 | 0.00421292 |
| 0.72795194             | 0.35062087 | 0.0007741   | 7.84E-05                | 0.00052295 | 0.00026869 |
| 0.64165738             | 0.04076613 | 0.00081649  | 0.00067075              | 0.00072314 | 5.79E-05   |
| 0.72371057             | 0.44704036 | 0.01259242  | 0.00176645              | 0.00167378 | 0.00108546 |
| 0.96409585             | 0.05863197 | 0.00466501  | 0.00253495              | 0.00409142 | 0.0003293  |
| 0.49594078             | 0.26128524 | 0.00411551  | 0.00103842              | 0.00180394 | 0.001014   |
| 0.79626044             | 0.69401621 | 0.01804433  | 0.00171161              | 0.00523011 | 0.0046333  |
| 0.74635513             | 0.09017778 | 0.00565907  | 0.00272751              | 0.00336945 | 0.00050404 |
| 0.195339               | 0.7897574  | 0.02199434  | 0.00679797              | 0.00165389 | 0.00572109 |
| 0.04428453             | 0.94654356 | 0.00856636  | 0.00678106              | 0.000438   | 0.00678938 |
| 0.14206199             | 0.06605792 | 0.00032963  | 0.00060801              | 0.00022363 | 0.00011069 |
| 0.94973253             | 0.49860499 | 0.0126723   | 0.00126463              | 0.0060467  | 0.00342352 |
| 0.02745388             | 0.56180534 | 0.00079347  | 0.00104668              | 8.58E-05   | 0.0013459  |
| 0.45780288             | 0.75841315 | 0.00312257  | 0.00030539              | 0.00285568 | 0.00446731 |
| 0.69198505             | 0.26983479 | 0.00225365  | 0.00036524              | 0.00066437 | 0.0002819  |
| 0.42474781             | 0.02868251 | 0.00043589  | 0.0006573               | 0.00044135 | 3.70E-05   |
| 0.42461281             | 0.59327429 | 0.00217208  | 0.00026602              | 0.00103936 | 0.00140454 |
| 0.49739999             | 0.03395052 | 0.00054121  | 0.00062447              | 0.0004949  | 4.20E-05   |
| 0.70807449             | 0.27077593 | 0.00190296  | 0.00029208              | 0.0005382  | 0.00022393 |
| 0.48331109             | 0.1487964  | 0.00469378  | 0.00205963              | 0.00115179 | 0.00039606 |
| 0.51247566             | 0.73374675 | 0.00064038  | 4.39E-05                | 7.35E-05   | 0.00010238 |
| 0.51261641             | 0.72918224 | 0.00063866  | 4.40E-05                | 7.35E-05   | 0.00010179 |
| 0.84007726             | 0.89664126 | 0.03965447  | 0.00355863              | 0.00315902 | 0.00334717 |
| 0.86086732             | 0.29516427 | 0.00913325  | 0.00147916              | 0.00310179 | 0.00119042 |
| 0.60131108             | 0.45461602 | 0.00660412  | 0.00093384              | 0.00154539 | 0.00120189 |
| 0.34327134             | 0.89450682 | 0.0224621   | 0.0038057               | 0.00208006 | 0.00486908 |
| 0.84005879             | 0.88817654 | 0.03809489  | 0.00340573              | 0.00302432 | 0.00317776 |
| 0.86873715             | NA         | 0.00642871  | 0.00145016              | 0.00438058 | 0.0005877  |
| 0.34048949             | 0.91928034 | 0.02510829  | 0.00430556              | 0.00218873 | 0.00528233 |
| 0.48557048             | 0.56951064 | 0.02642048  | 0.00512209              | 0.00346962 | 0.00399604 |
| 0.25245164             | 0.31179805 | 0.00779991  | 0.003479                | 0.00140212 | 0.00169465 |
| 0.5197146              | 0.70209011 | 0.00704078  | 0.00077742              | 0.00213044 | 0.00278587 |
| 0.91546948             | 0.30069929 | 0.00883612  | 0.00132203              | 0.00315832 | 0.00116645 |
| 0.62597696             | 0.46156699 | 0.00380822  | 0.00045777              | 0.00083231 | 0.00063163 |

|            |            |            |            |            |            |
|------------|------------|------------|------------|------------|------------|
| 0.52358507 | 0.7858203  | 0.0424004  | 0.006618   | 0.00377192 | 0.00539835 |
| 0.79224118 | 0.34011733 | 0.00347496 | 0.00043721 | 0.00512427 | 0.00242129 |
| 0.17322476 | 0.35741722 | 0.00293096 | 0.00135239 | 0.0004798  | 0.00092506 |
| 0.62913607 | 0.57314045 | 0.00595499 | 0.00064123 | 0.00061052 | 0.00056099 |
| 0.45541593 | 0.72263508 | 0.00806239 | 0.00100656 | 0.00108006 | 0.00163582 |
| 0.5142636  | 0.54807348 | 0.00508148 | 0.00066192 | 0.00156823 | 0.0016604  |
| 0.78118927 | 0.10430442 | 0.00997616 | 0.00453416 | 0.0041901  | 0.00068999 |
| 0.89874755 | 0.20276556 | 0.00047759 | 6.12E-05   | 0.00165528 | 0.00043093 |
| 0.39856162 | 0.44696638 | 0.00785612 | 0.0016939  | 0.00075404 | 0.00083643 |
| 0.0668996  | 0.60486936 | 0.00535479 | 0.00401331 | 0.00042856 | 0.00311089 |
| 0.97740277 | 0.48270446 | 0.03569273 | 0.00469519 | 0.00726587 | 0.00390462 |
| 0.00483807 | 0.3920271  | 0.00029751 | 0.0022882  | 2.89E-05   | 0.00161167 |
| 0.3278092  | 0.06737492 | 0.0003509  | 0.0002993  | 0.00035729 | 8.37E-05   |
| 0.95166127 | 0.35882199 | 0.01095567 | 0.00141753 | 0.00286326 | 0.00119582 |
| 0.99927469 | 0.9857907  | 0.06583003 | 0.00550273 | 0.00672587 | 0.00664625 |
| 0.98595039 | 0.99186249 | 0.06488232 | 0.00543072 | 0.00662687 | 0.00666169 |
| 0.85361892 | 0.59195679 | 0.04200286 | 0.00545785 | 0.00613114 | 0.00444159 |
| 0.90445216 | 0.34440745 | 0.01757785 | 0.002764   | 0.00339154 | 0.00143206 |
| 0.42784938 | 0.79891981 | 0.02938943 | 0.00486374 | 0.00354465 | 0.00615021 |
| 0.14638466 | 0.336577   | 0.00234464 | 0.00127931 | 0.00138405 | 0.00291392 |
| 0.85747242 | 0.89929636 | 0.02917233 | 0.00234081 | 0.00511514 | 0.00533423 |
| 0.57536079 | 0.16490887 | 0.00303999 | 0.00096103 | 0.00471251 | 0.00154932 |
| 0.00867558 | 0.49277188 | 0.00109093 | 0.00471426 | 0.00010279 | 0.00398532 |
| 0.55730693 | 0.22331928 | 0.01105522 | 0.00352917 | 0.00306132 | 0.00135157 |
| 0.05904291 | 0.24391392 | 0.00118212 | 0.00175272 | 0.00034341 | 0.00124231 |
| 0.30646056 | 0.09112029 | 0.00253077 | 0.00232546 | 0.00206152 | 0.00069181 |
| 0.30043586 | 0.09537557 | 0.00264322 | 0.00239007 | 0.00203717 | 0.00072531 |
| 0.75194202 | 0.3738342  | 0.00863802 | 0.00126199 | 0.00203429 | 0.00108621 |
| 0.52617949 | 0.35467795 | 0.00861478 | 0.00181685 | 0.00141559 | 0.00099242 |
| 0.98635768 | 0.78801562 | 0.05320772 | 0.00509756 | 0.00570633 | 0.00468248 |
| 0.27175958 | 0.03205182 | 0.00230125 | 0.00585159 | 0.00230315 | 0.00033405 |
| 0.15319903 | 0.15824964 | 0.00086801 | 0.00077061 | 0.00047475 | 0.00048896 |
| 0.64925332 | 0.21868488 | 0.01110853 | 0.0031582  | 0.00314558 | 0.00118828 |
| 0.66437054 | 0.5549212  | 0.01578436 | 0.00207973 | 0.00196703 | 0.00167418 |
| 0.73813592 | 0.82417269 | 0.01493627 | 0.00123871 | 0.00428035 | 0.00471804 |
| 0.30003855 | 0.47333032 | 0.0016313  | 0.00032062 | 0.00141741 | 0.00213253 |
| 0.48924652 | 0.51956621 | 0.00684059 | 0.00104057 | 0.0017838  | 0.00188246 |
| 0.51358714 | 0.33755727 | 0.00396811 | 0.00076436 | 0.00373317 | 0.00257118 |
| 0.51934351 | 0.39029956 | 0.01420396 | 0.00311013 | 0.00269788 | 0.00209098 |
| 0.89397979 | 0.06382565 | 0.00024508 | 8.33E-05   | 0.00532423 | 0.00050016 |
| 0.4632904  | 0.33882959 | 0.00383124 | 0.00080197 | 0.0035619  | 0.00269748 |

|            |            |            |            |            |            |
|------------|------------|------------|------------|------------|------------|
| 0.35402834 | 0.86258849 | 0.00595913 | 0.00074604 | 0.0012926  | 0.00286748 |
| 0.34399197 | 0.00586511 | 3.74E-05   | 0.00022085 | 0.00084226 | 2.00E-05   |
| 0.51852119 | 0.93656505 | 0.01840283 | 0.00196966 | 0.00401294 | 0.0067545  |
| 0.92546123 | 0.28474485 | 0.0078521  | 0.00119083 | 0.00276455 | 0.00096078 |
| 0.58242494 | 0.71890047 | 0.00266423 | 0.00021292 | 0.00204615 | 0.00246927 |
| 0.23525989 | 0.44656505 | 0.00262573 | 0.00073753 | 0.00132712 | 0.00235634 |
| 0.76307983 | 0.7831796  | 0.01421727 | 0.00118346 | 0.00239413 | 0.00245029 |
| 0.26488033 | 0.90237361 | 0.01067285 | 0.00189025 | 0.00171869 | 0.00510992 |
| 0.26466465 | 0.90272327 | 0.01232062 | 0.00225515 | 0.00206202 | 0.00611786 |
| 0.26441642 | 0.90460978 | 0.0109484  | 0.00194893 | 0.00178997 | 0.00533802 |
| 0.37514521 | 0.94641517 | 0.01867254 | 0.00265296 | 0.0032258  | 0.00729432 |
| 0.93477112 | 0.97123031 | 0.00391302 | 0.00016608 | 0.00153502 | 0.00158864 |
| 0.67423243 | 0.59163888 | 0.0147481  | 0.00178104 | 0.00504214 | 0.00449314 |
| 0.88428384 | 0.74426884 | 0.04107078 | 0.00419839 | 0.00686517 | 0.00590159 |
| 0.81280478 | 0.32491419 | 0.00311009 | 0.00039011 | 0.00488803 | 0.00216585 |
| 0.67817679 | 0.28003724 | 0.00056918 | 7.21E-05   | 0.00015277 | 6.76E-05   |
| 0.55953002 | 0.18645685 | 0.00408132 | 0.00124991 | 0.00119292 | 0.00044105 |
| 0.87750893 | 0.52528186 | 0.00826326 | 0.00076504 | 0.00201796 | 0.00127354 |
| 0.19084803 | 0.46175881 | 0.001764   | 0.00054256 | 0.00156052 | 0.00343313 |
| 0.92825911 | 0.299222   | 0.01394955 | 0.00229752 | 0.00659049 | 0.00242077 |
| 0.41837308 | 0.23568475 | 0.01216561 | 0.00487038 | 0.00349069 | 0.00209414 |
| 0.06899354 | 0.66962396 | 5.17E-05   | 1.75E-05   | 2.62E-06   | 2.20E-05   |
| 0.39768822 | 0.89422651 | 0.01066679 | 0.00132254 | 0.00103657 | 0.00214553 |
| 0.36379239 | 0.90820944 | 0.00506713 | 0.00057111 | 0.00053059 | 0.00121379 |
| 0.44330185 | 0.29781463 | 0.00149825 | 0.00031024 | 0.00032324 | 0.00022468 |
| 0.77111452 | 0.34855184 | 0.00111711 | 0.00011467 | 0.00013567 | 6.52E-05   |
| 0.03489295 | 0.70028504 | 0.00116356 | 0.00107024 | 0.00029974 | 0.00445496 |
| 0.08343446 | 0.47409349 | 0.0027602  | 0.00188437 | 0.00033498 | 0.00161433 |
| 0.5084285  | 0.27468178 | 0.00137196 | 0.00026589 | 0.00034219 | 0.00019484 |
| 0.84219663 | 0.32189111 | 0.01171584 | 0.00189345 | 0.00332216 | 0.00140708 |
| 0.04765926 | 0.96022837 | 0.00614221 | 0.00423202 | 0.00028862 | 0.00430987 |
| 0.43892503 | 0.00544167 | 4.29E-05   | 0.00021992 | 0.00094579 | 1.67E-05   |
| 0.94111567 | 0.043517   | 0.00234252 | 0.00150889 | 0.00697082 | 0.00044538 |
| 0.54731549 | 0.69185272 | 0.01378106 | 0.00171533 | 0.0013254  | 0.00163584 |
| 0.608855   | 0.35024706 | 0.01505191 | 0.00319343 | 0.00494594 | 0.00303152 |
| 0.6673961  | 0.48068306 | 0.02106215 | 0.0033764  | 0.00309621 | 0.00231157 |
| 0.67095792 | 0.10812112 | 0.00434959 | 0.0018675  | 0.00154282 | 0.00029516 |
| 0.13769789 | 0.1652422  | 0.00380128 | 0.00447196 | 0.00079353 | 0.00093571 |
| 0.22563945 | 0.1003965  | 0.00103329 | 0.00100013 | 0.00026052 | 0.00012393 |
| 0.77893283 | 0.30615114 | 0.02682861 | 0.00594887 | 0.00503158 | 0.00219687 |
| 0.14594335 | 0.30887218 | 0.00172398 | 0.00096936 | 0.00028    | 0.00055441 |

|            |            |            |            |            |            |
|------------|------------|------------|------------|------------|------------|
| 0.47418249 | 0.77085619 | 0.02415797 | 0.00357457 | 0.00241638 | 0.00372185 |
| 0.8978275  | 0.17050749 | 0.00244427 | 0.00048167 | 0.00112886 | 0.00024965 |
| 0.86674982 | 0.17350634 | 0.00241176 | 0.00048186 | 0.00109596 | 0.00025422 |
| 0.96722652 | 0.30477127 | 0.00094609 | 8.67E-05   | 0.00013147 | 4.53E-05   |
| 0.40868826 | 0.15172037 | 0.00552542 | 0.00285196 | 0.00227255 | 0.00093336 |
| 0.63967124 | 0.0900481  | 0.00392731 | 0.0020349  | 0.00338696 | 0.00058217 |
| 0.80342141 | 0.09230676 | 0.00498334 | 0.00215111 | 0.00402099 | 0.00057718 |
| 0.85013982 | 0.51763915 | 0.00340055 | 0.00027233 | 0.0008046  | 0.00051312 |
| 0.01733975 | 0.92137237 | 0.00234402 | 0.00349809 | 0.0001138  | 0.00414266 |
| NA         | 0.97561748 | 0.00028788 | 4.28E-05   | 7.79E-06   | 9.72E-05   |
| NA         | 0.9591509  | 0.0010524  | 0.00017852 | 1.92E-05   | 0.00021961 |
| 0.52512068 | 0.26821554 | 0.0063025  | 0.00160325 | 0.00160202 | 0.00087488 |
| 0.03589211 | 0.36962436 | 0.0016751  | 0.00280757 | 0.00014172 | 0.00118448 |
| 0.53785431 | 0.79315853 | 0.02145774 | 0.00268281 | 0.00363462 | 0.00512304 |
| 0.71859341 | 0.22723591 | 0.01925255 | 0.00548223 | 0.00588819 | 0.002122   |
| 0.42187636 | 0.42853842 | 0.00365969 | 0.00066824 | 0.00330229 | 0.00334854 |
| 0.41721119 | 0.44139827 | 0.00339745 | 0.00060151 | 0.00336011 | 0.00353234 |
| 0.17980578 | 0.38587269 | 0.00236101 | 0.00094736 | 0.00114444 | 0.00227004 |
| 0.70059635 | 0.7876549  | 0.02795341 | 0.00298546 | 0.00333566 | 0.00370074 |
| 0.69323669 | 0.79668745 | 0.02885721 | 0.00310726 | 0.00337234 | 0.00381485 |
| 0.47608561 | 0.02050998 | 0.00152674 | 0.00331685 | 0.00396581 | 0.00023266 |
| 0.23642983 | 0.38600271 | 0.00593659 | 0.00220083 | 0.00164672 | 0.00255233 |
| 0.85154881 | 0.84093469 | 0.02645765 | 0.00220596 | 0.00595956 | 0.00589425 |
| 0.9598421  | 0.98276051 | 0.01820715 | 0.00107047 | 0.00239296 | 0.00244385 |
| 0.57730203 | 0.36430364 | 0.01106592 | 0.00221525 | 0.00193959 | 0.00128331 |
| 0.20689654 | 0.86736721 | 0.01137002 | 0.00263803 | 0.00093901 | 0.00338897 |
| 0.00745459 | 0.2848727  | 5.21E-05   | 0.00030356 | 2.16E-05   | 0.00061768 |
| 0.24599689 | 0.44046786 | 0.00104904 | 0.00024535 | 0.00033511 | 0.00056947 |
| 0.24997802 | 0.43908177 | 0.00119955 | 0.00028336 | 0.00038457 | 0.00064178 |
| 0.47592086 | 0.3288639  | 0.0001066  | 1.27E-05   | 0.00011218 | 7.98E-05   |
| 0.53419194 | 0.36035739 | 0.02151    | 0.00544389 | 0.00431103 | 0.0030413  |
| 0.87939673 | 0.92183185 | 0.02585882 | 0.00191737 | 0.00238041 | 0.00248259 |
| 0.53726568 | 0.1868406  | 0.01243166 | 0.00492177 | 0.0039262  | 0.00153108 |
| 0.54633666 | 0.92935838 | 0.014244   | 0.00137358 | 0.00167556 | 0.0026935  |
| 0.47817091 | 0.33934732 | 0.01067186 | 0.00267085 | 0.0020777  | 0.00152818 |
| 0.29636392 | 0.87708453 | 0.02988947 | 0.00632264 | 0.00239353 | 0.00625368 |
| 0.97965337 | 0.4549034  | 0.00047226 | 2.64E-05   | 0.00373413 | 0.00188578 |
| 0.16150422 | 0.57095909 | 0.0099321  | 0.0040429  | 0.00087487 | 0.00271669 |
| 0.226631   | 0.56891675 | 0.01379224 | 0.00447875 | 0.00121503 | 0.00276986 |
| 0.22667071 | 0.56897914 | 0.01379508 | 0.00447875 | 0.00121522 | 0.00277013 |
| 0.98601583 | 0.09765763 | 0.01212653 | 0.00495397 | 0.00779399 | 0.00099718 |



|            |            |            |            |            |            |
|------------|------------|------------|------------|------------|------------|
| 0.92978015 | 0.12505881 | 0.01103431 | 0.00373975 | 0.00500342 | 0.00083315 |
| 0.35913538 | 0.22056359 | 0.00169968 | 0.00057237 | 0.00066151 | 0.00042479 |
| 0.04572898 | 0.23141064 | 0.00072766 | 0.00133197 | 0.00040513 | 0.00175411 |
| 0.80076477 | 0.96921049 | 0.03179438 | 0.00260069 | 0.00564602 | 0.00667635 |
| 0.08047944 | 0.67707181 | 0.00436193 | 0.00241973 | 0.00033591 | 0.0022997  |
| 0.70550427 | 0.77529563 | 0.02041744 | 0.00201847 | 0.0021674  | 0.00235783 |
| 0.61242176 | 0.28313563 | 0.01241581 | 0.00302891 | 0.00294671 | 0.00147875 |
| 0.93183086 | 0.33644514 | 0.01236625 | 0.00177674 | 0.00372162 | 0.00149991 |
| 0.15297199 | 0.87055293 | 0.00945844 | 0.00275032 | 0.00075037 | 0.00356652 |
| 0.38557701 | 0.36953546 | 0.00648132 | 0.00164094 | 0.00161238 | 0.00155207 |
| 0.05455044 | 0.28592402 | 0.00242528 | 0.00371609 | 0.000498   | 0.00221728 |
| 0.65008621 | 0.74906126 | 0.01523953 | 0.0015515  | 0.00438665 | 0.00497102 |
| 0.9157195  | 0.72284074 | 0.02777775 | 0.00251871 | 0.00276683 | 0.00224083 |
| 0.35696026 | 0.08247091 | 0.00039857 | 0.00026596 | 0.00030859 | 8.04E-05   |
| 0.10104023 | 0.76060544 | 0.01246158 | 0.00624362 | 0.00089366 | 0.00541624 |
| 0.45646543 | 0.16269488 | 0.00078784 | 0.00024888 | 0.00037501 | 0.00014585 |
| 0.35248543 | 0.08173864 | 0.00039667 | 0.00026978 | 0.00031667 | 8.28E-05   |
| 0.26408793 | 0.90487931 | 0.01092552 | 0.00194559 | 0.00179274 | 0.0053534  |
| 0.34970831 | 0.87211319 | 0.01552298 | 0.00241283 | 0.00307821 | 0.00689521 |
| 0.84353147 | 0.32179366 | 0.01109317 | 0.00176855 | 0.0031162  | 0.00131658 |
| 0.07650234 | 0.28054528 | 0.00210238 | 0.00237363 | 0.00076066 | 0.00244543 |
| 0.61764678 | 0.21616257 | 0.00110833 | 0.00021603 | 0.00259164 | 0.00101084 |
| 0.19335655 | 0.27645057 | 0.00255407 | 0.00131372 | 0.00142678 | 0.0019658  |
| 0.92221963 | 0.25435321 | 0.00347861 | 0.0004966  | 0.00140599 | 0.00043846 |
| 0.88148638 | 0.79970945 | 0.01854709 | 0.00142421 | 0.0060142  | 0.00552088 |
| 0.8156596  | 0.54249299 | 0.04370323 | 0.00645812 | 0.00576376 | 0.00402253 |
| 0.92083011 | 0.12991392 | 0.00122342 | 0.00026799 | 0.00056584 | 9.42E-05   |
| 0.7601951  | 0.46026018 | 0.00678402 | 0.00077186 | 0.00355292 | 0.00227354 |
| 0.9978806  | 0.2863599  | 0.0149407  | 0.00243869 | 0.00480911 | 0.00158336 |
| 0.24031254 | 0.78033542 | 0.00102857 | 0.000145   | 3.92E-05   | 0.00011652 |
| 0.23923456 | 0.77857322 | 0.00098893 | 0.00013937 | 3.75E-05   | 0.00011158 |
| 0.57610552 | 0.59806475 | 0.00210515 | 0.00019243 | 0.00020333 | 0.00021042 |
| 0.27521499 | 0.60227561 | 0.00647223 | 0.00143019 | 0.00176682 | 0.00355106 |
| 0.99278121 | 0.46802163 | 0.04926116 | 0.00723478 | 0.00720036 | 0.00371291 |
| 0.87713526 | 0.56466036 | 0.04096281 | 0.00537667 | 0.00575481 | 0.00390198 |
| 0.20158935 | 0.80176723 | 0.02261933 | 0.00675752 | 0.00172736 | 0.00588473 |
| 0.8284498  | 0.55933209 | 0.04626252 | 0.00667989 | 0.00665121 | 0.00470822 |
| 0.29882739 | 0.52898651 | 0.01717958 | 0.00490004 | 0.002324   | 0.00386116 |
| 0.73637633 | 0.88611485 | 0.02742013 | 0.00250903 | 0.00280983 | 0.00331227 |
| 0.90561415 | 0.77778184 | 0.02068712 | 0.00163636 | 0.00359056 | 0.00313702 |
| 0.43016095 | 0.07882582 | 0.00399694 | 0.00333055 | 0.00293415 | 0.00063869 |

|            |            |            |            |            |            |
|------------|------------|------------|------------|------------|------------|
| 0.49631824 | 0.91753729 | 0.01185121 | 0.00120558 | 0.00135687 | 0.00235265 |
| 0.84777606 | 0.40542364 | 0.0291703  | 0.00479425 | 0.00463251 | 0.00240724 |
| 0.36807072 | 0.3258543  | 0.00751123 | 0.00228585 | 0.0031287  | 0.00280751 |
| 0.16187168 | 0.45970314 | 0.00363047 | 0.00147457 | 0.00044636 | 0.00114868 |
| 0.57638735 | 0.43253065 | 0.0059115  | 0.00088765 | 0.00307208 | 0.00237905 |
| 0.39809013 | 0.73556953 | 0.00369511 | 0.0004362  | 0.00059851 | 0.00104303 |
| 0.38709845 | 0.78319834 | 0.0079698  | 0.00106872 | 0.00174274 | 0.0032676  |
| 0.88110995 | 0.75349398 | 0.00763161 | 0.00049845 | 0.00084668 | 0.00073493 |
| 0.83358599 | 0.8962229  | 0.02447054 | 0.00192215 | 0.0054991  | 0.00586083 |
| 0.40447243 | 0.94389531 | 0.0197349  | 0.00266551 | 0.00264306 | 0.00559669 |
| 0.96593322 | 0.74358533 | 0.00717994 | 0.00043059 | 0.00320925 | 0.00254288 |
| 0.11924694 | 0.6268261  | 0.00108069 | 0.00035651 | 8.54E-05   | 0.00039149 |
| 0.79333162 | 0.14307682 | 0.0018034  | 0.00044231 | 0.0005219  | 0.00010885 |
| 0.29156289 | 0.05684089 | 0.0015966  | 0.00217934 | 0.00252441 | 0.00057959 |
| 0.29298084 | 0.05667757 | 0.00162861 | 0.00222554 | 0.00253607 | 0.00057825 |
| 0.34299667 | 0.90062475 | 0.01075267 | 0.00151578 | 0.00065716 | 0.00156983 |
| 0.1524045  | 0.39914028 | 0.00039048 | 0.00013354 | 0.00013891 | 0.00033556 |
| 0.26530332 | 0.90141555 | 0.01136119 | 0.00203973 | 0.00182969 | 0.00542145 |
| 0.02644496 | 0.67847843 | 0.00137901 | 0.00171635 | 7.48E-05   | 0.00144332 |
| 0.56384621 | 0.46730082 | 0.01475558 | 0.00258142 | 0.00304912 | 0.00257983 |
| 0.9884288  | 0.27978201 | 0.00221817 | 0.0002504  | 0.00231509 | 0.00074425 |
| 0.93586879 | 0.25019833 | 0.00525629 | 0.00081544 | 0.00299556 | 0.00091812 |
| 0.44817124 | 0.84512195 | 0.02731069 | 0.00404651 | 0.00297676 | 0.0052184  |
| 0.52150927 | 0.39855193 | 0.00657893 | 0.00119005 | 0.00232534 | 0.00182851 |
| 0.15248839 | 0.8369463  | 0.00117481 | 0.00024094 | 0.0001151  | 0.00054641 |
| 0.0346483  | 0.49971647 | 0.00098222 | 0.00120257 | 5.59E-05   | 0.00064537 |
| 0.338303   | 0.43843789 | 0.02280763 | 0.00736087 | 0.00302456 | 0.00380686 |
| 0.16176009 | 0.47388224 | 0.00113369 | 0.00036828 | 0.00013076 | 0.00035004 |
| 0.76506724 | 0.58741669 | 0.00938991 | 0.00091563 | 0.00270419 | 0.0021364  |
| 0.77122731 | 0.42110628 | 0.01472221 | 0.00213604 | 0.00546636 | 0.00320159 |
| 0.87652522 | 0.0880144  | 0.00231017 | 0.00083912 | 0.00313861 | 0.00039604 |
| 0.12312906 | 0.1340583  | 0.00043671 | 0.00049997 | 9.05E-05   | 9.79E-05   |
| 0.00116709 | 0.29615993 | 2.50E-05   | 0.00071266 | 6.00E-06   | 0.00098863 |
| 0.80346542 | 0.89938064 | 0.03526745 | 0.0031695  | 0.00638717 | 0.00705074 |
| 0.17205953 | 0.03862013 | 0.00085801 | 0.00243373 | 0.00125119 | 0.00032286 |
| 0.58586961 | 0.26972113 | 0.01279825 | 0.00341369 | 0.00277691 | 0.00138748 |
| 0.33536022 | 0.04730649 | 0.00311383 | 0.00488053 | 0.00292827 | 0.00050262 |
| 0.32095948 | 0.35046964 | 0.001429   | 0.00033976 | 0.00022758 | 0.00024666 |
| 0.14999768 | 0.93706615 | 0.00973343 | 0.00271391 | 0.00056084 | 0.00291326 |
| 0.85062609 | 0.85467094 | 0.01302923 | 0.00088941 | 0.00079131 | 0.00079471 |
| 0.54221626 | 0.56308222 | 0.00679365 | 0.00087459 | 0.00050525 | 0.00052289 |

|            |            |            |            |            |            |
|------------|------------|------------|------------|------------|------------|
| 0.67289473 | 0.46618583 | 0.00492689 | 0.00057874 | 0.00228144 | 0.00164287 |
| 0.88569493 | 0.85457429 | 0.00879704 | 0.00052694 | 0.0004853  | 0.00046977 |
| 0.27703117 | NA         | 0.00011863 | 5.28E-05   | 4.20E-05   | 1.11E-05   |
| 0.77098477 | 0.74760735 | 0.02135848 | 0.00203904 | 0.00580565 | 0.0056506  |
| 0.74481038 | 0.17227396 | 0.00166544 | 0.00036037 | 0.00139313 | 0.00037005 |
| 0.15663496 | 0.48649951 | 0.0003101  | 8.34E-05   | 0.00045462 | 0.00126789 |
| 0.99520925 | 0.85019483 | 0.01884411 | 0.00123312 | 0.00139934 | 0.00121453 |
| 0.20133894 | 0.6788373  | 0.00454791 | 0.00111474 | 0.00099824 | 0.00296603 |
| 0.86659425 | 0.78086522 | 0.03377668 | 0.00317699 | 0.00392333 | 0.00357752 |
| 0.01881082 | 0.69566713 | 0.00050813 | 0.00073259 | 3.02E-05   | 0.0008301  |
| 0.88246027 | 0.78325858 | 0.03248078 | 0.00296391 | 0.00369287 | 0.00332229 |
| 0.44424671 | 0.78856724 | 0.01987157 | 0.00290258 | 0.0022676  | 0.00377734 |
| 0.11791628 | 0.64833112 | 0.001495   | 0.00050907 | 0.00033146 | 0.00155116 |
| 0.33005354 | 0.09926586 | 0.00453927 | 0.00398465 | 0.0019826  | 0.00067192 |
| 0.49183665 | 0.85984411 | 0.00935346 | 0.00096269 | 0.00358582 | 0.00587119 |
| 0.39689692 | 0.05655885 | 0.00252336 | 0.0028153  | 0.00244918 | 0.00042265 |
| 0.13056198 | 0.95844113 | 0.0009145  | 0.00018335 | 0.00048563 | 0.00292073 |
| 0.95490653 | 0.54477205 | 0.01896716 | 0.00192382 | 0.00466465 | 0.00283671 |
| 0.89951805 | 0.84521609 | 0.00152882 | 6.36E-05   | 0.0035403  | 0.00335006 |
| 0.4691743  | 0.49103938 | 0.00255811 | 0.00035031 | 0.00288283 | 0.003002   |
| 0.96474339 | 0.53966318 | 0.01808681 | 0.00181085 | 0.00431238 | 0.00257527 |
| 0.27556591 | 0.82680198 | 0.0103386  | 0.00189774 | 0.00178731 | 0.00474804 |
| 0.35889868 | 0.49219572 | 0.01724842 | 0.00446449 | 0.0027015  | 0.00357661 |
| 0.05608575 | 0.69840306 | 0.00188158 | 0.00121767 | 0.00046151 | 0.00443963 |
| 0.88202002 | 0.25781741 | 0.00397095 | 0.00059825 | 0.00279546 | 0.00092773 |
| 0.05271824 | 0.54879946 | 0.00540157 | 0.00545151 | 0.00045288 | 0.00372012 |
| 0.20292332 | 0.70425695 | 0.0136627  | 0.00404238 | 0.0018756  | 0.00565977 |
| 0.52648762 | 0.70203071 | 0.01295463 | 0.00162364 | 0.00251096 | 0.00324353 |
| 0.55784212 | 0.8009821  | 0.01279104 | 0.00134794 | 0.00251102 | 0.00346381 |
| 0.07142339 | 0.27841768 | 0.00260496 | 0.00325295 | 0.00037136 | 0.00127373 |
| 0.01328217 | 0.17091232 | 0.00022749 | 0.0014486  | 3.36E-05   | 0.00035322 |
| 0.95169866 | 0.9947104  | 0.06289631 | 0.00535895 | 0.00644426 | 0.00669894 |
| 0.40415611 | 0.29642881 | 0.00020104 | 3.35E-05   | 0.00037127 | 0.00027976 |
| 0.1254676  | 0.7643423  | 0.00888278 | 0.00341321 | 0.00091787 | 0.00461334 |
| NA         | 0.90771514 | 0.00572857 | 0.0007626  | 0.0007626  | 0.00572857 |
| 0.67600832 | 0.29853007 | 0.00937094 | 0.00187639 | 0.00410641 | 0.00198471 |
| 0.85803771 | 0.66812019 | 0.00783245 | 0.00058797 | 0.00379154 | 0.0030368  |
| 0.93249943 | 0.65642803 | 0.01346162 | 0.00108192 | 0.00137461 | 0.00100203 |
| 0.94536462 | 0.65645    | 0.01680296 | 0.00141024 | 0.00176623 | 0.00127304 |
| 0.52478167 | 0.53530617 | 0.00829914 | 0.0012026  | 0.00306763 | 0.00312224 |
| 0.76742739 | 0.58698289 | 0.00905972 | 0.0008744  | 0.00261979 | 0.00206244 |

|            |            |            |            |            |            |
|------------|------------|------------|------------|------------|------------|
| 0.01562552 | 0.9133479  | 0.0021328  | 0.00346914 | 0.00010701 | 0.00424878 |
| 0.1650126  | 0.44710129 | 0.001786   | 0.00064681 | 0.0002346  | 0.00058209 |
| 0.5848797  | 0.9865133  | 0.03056055 | 0.00321705 | 0.00275473 | 0.00437956 |
| 0.4520725  | 0.76507309 | 0.02958087 | 0.00485343 | 0.00356703 | 0.00567631 |
| 0.4074316  | 0.96322606 | 0.01263854 | 0.00149226 | 0.00104562 | 0.00226313 |
| 0.08997675 | 0.75838942 | 0.00273652 | 0.00114323 | 0.00014871 | 0.00103668 |
| 0.47900409 | 0.33433789 | 0.00778692 | 0.00184361 | 0.00150463 | 0.00108883 |
| 0.92090696 | 0.28031619 | 0.01306878 | 0.00226298 | 0.00567173 | 0.00197422 |
| 0.70717077 | 0.4093297  | 0.01069434 | 0.00159615 | 0.00253908 | 0.00155708 |
| 0.76506724 | 0.58741669 | 0.00938991 | 0.00091563 | 0.00270419 | 0.0021364  |
| 0.27405286 | 0.14351001 | 0.00373021 | 0.00269252 | 0.00143269 | 0.00079959 |
| 0.92772221 | 0.82899743 | 0.05732487 | 0.0056818  | 0.00633416 | 0.00573814 |
| 0.7238056  | 0.4469049  | 0.01179424 | 0.00162963 | 0.00154292 | 0.00099976 |
| 0.8018701  | 0.39981416 | 0.01856705 | 0.0028847  | 0.00346092 | 0.00186138 |
| 0.90368569 | 0.32224274 | 0.01463045 | 0.00233638 | 0.00440543 | 0.00175986 |
| NA         | 0.77718324 | 0.00376336 | 0.0005533  | 0.0005533  | 0.00376336 |
| 0.80243144 | 0.18795839 | 0.00111948 | 0.00019546 | 0.00027341 | 7.20E-05   |
| 0.53354286 | 0.01973756 | 0.00105247 | 0.00203234 | 0.00157392 | 7.80E-05   |
| 0.51962079 | 0.58937175 | 0.03312398 | 0.00624005 | 0.0043153  | 0.00482285 |
| 0.81874391 | 0.67251561 | 0.01268812 | 0.00110576 | 0.00431481 | 0.00362529 |
| 0.13178444 | 0.62273006 | 0.00189871 | 0.00063076 | 0.00043982 | 0.00178859 |
| 0.49307922 | 0.62221873 | 0.01479591 | 0.00226137 | 0.00126165 | 0.00155495 |
| 0.15594613 | 0.82572388 | 0.00634274 | 0.00175075 | 0.00055393 | 0.00248396 |
| 0.83717153 | 0.99927417 | 0.05344408 | 0.00480588 | 0.00495163 | 0.00578649 |
| 0.43534116 | 0.51331652 | 0.00191831 | 0.00025632 | 0.00032018 | 0.00037211 |
| 0.48260683 | 0.62507045 | 0.01415336 | 0.00217286 | 0.0011586  | 0.00146207 |
| 0.83175524 | 0.78103404 | 0.05190631 | 0.00577658 | 0.00649747 | 0.00614846 |
| 0.45798441 | 0.38994627 | 0.01130993 | 0.00263232 | 0.00250201 | 0.0021675  |
| 0.45768501 | 0.60812997 | 0.02238032 | 0.00413232 | 0.00335112 | 0.00431019 |
| 0.39626611 | 0.47407949 | 0.00819617 | 0.00170022 | 0.00077655 | 0.0009132  |
| 0.2482566  | 0.73396124 | 0.00497236 | 0.00095689 | 0.00100385 | 0.00265333 |
| 0.82457001 | 0.53205225 | 0.00266621 | 0.00020419 | 0.00058853 | 0.00039513 |
| 0.72908076 | 0.4076836  | 0.01695553 | 0.00275521 | 0.00334388 | 0.00199214 |
| 0.84809944 | 0.89450691 | 0.0614236  | 0.00630645 | 0.00613052 | 0.00642396 |
| 0.60653553 | 0.18885678 | 0.00883718 | 0.00289679 | 0.0033353  | 0.00117484 |
| 0.82733247 | 0.54328143 | 0.00264356 | 0.00019768 | 0.00058447 | 0.00039871 |
| 0.8475115  | 0.55354289 | 0.01247823 | 0.00125114 | 0.00475458 | 0.00326126 |
| 0.20418406 | 0.97019584 | 0.02243307 | 0.00559406 | 0.00163938 | 0.00653601 |
| 0.37061493 | 0.26641638 | 0.00139022 | 0.00037058 | 0.00034618 | 0.00025606 |
| 0.54891271 | 0.29472273 | 0.01122791 | 0.00284908 | 0.00230098 | 0.00131802 |
| 0.52259273 | 0.27818045 | 0.00942398 | 0.00253245 | 0.00194918 | 0.0011065  |

|            |            |            |            |            |            |
|------------|------------|------------|------------|------------|------------|
| 0.98855323 | 0.79412061 | 0.0101274  | 0.00060664 | 0.00385672 | 0.00317594 |
| 0.66439515 | 0.19670763 | 0.00028598 | 4.62E-05   | 0.00058883 | 0.00019395 |
| 0.71695702 | 0.4359679  | 0.00323963 | 0.00035123 | 0.00585041 | 0.00377199 |
| 0.43957815 | 0.70075787 | 0.02286854 | 0.00388158 | 0.00326136 | 0.0049271  |
| 0.57142774 | 0.54583029 | 0.01561283 | 0.00238206 | 0.00157093 | 0.00150763 |
| 0.28258768 | 0.73796841 | 0.00633063 | 0.00113266 | 0.00187442 | 0.00440216 |
| 0.5033219  | NA         | 0.00737313 | 0.00275408 | 0.00339805 | 0.0007614  |
| 0.13494865 | 0.48640801 | 0.0011516  | 0.00043197 | 0.00024702 | 0.00079339 |
| 0.50023022 | 0.0355756  | 0.00058886 | 0.00065533 | 0.00051145 | 4.51E-05   |
| 0.62329135 | 0.91315415 | 0.03442888 | 0.00379674 | 0.00454675 | 0.00636327 |
| 0.3224764  | 0.20022634 | 0.00171395 | 0.00069569 | 0.00183599 | 0.00119681 |
| 0.02876735 | 0.98010525 | 0.00579105 | 0.00605059 | 0.00030328 | 0.00717557 |
| 0.34653831 | 0.68878024 | 0.00790303 | 0.00131202 | 0.00189772 | 0.00349976 |
| 0.8099705  | 0.3112845  | 0.00099633 | 0.0001064  | 0.00224707 | 0.00095208 |
| 0.54265085 | 0.91413058 | 0.01282186 | 0.00123065 | 0.00144145 | 0.00229936 |
| 0.159226   | 0.2661955  | 0.00267247 | 0.00170584 | 0.00057737 | 0.00091949 |
| 0.11006742 | 0.32412736 | 0.00553718 | 0.00466621 | 0.00067749 | 0.00179302 |
| 0.11518263 | 0.61464043 | 0.00328069 | 0.0013686  | 0.00042205 | 0.00191499 |
| 0.26202274 | 0.38703004 | 0.00114261 | 0.00028786 | 0.00128517 | 0.00182392 |
| 0.57303723 | 0.79899059 | 0.01906408 | 0.00217033 | 0.00189847 | 0.00255463 |
| 0.42601811 | 0.86039908 | 0.00173213 | 0.00014435 | 0.0024189  | 0.00451401 |
| 0.44434057 | 0.77437009 | 0.00125098 | 0.00010429 | 5.32E-05   | 8.89E-05   |
| 0.40705784 | 0.77053004 | 0.00311551 | 0.00033418 | 0.00016426 | 0.00029469 |
| 0.40711705 | 0.7753723  | 0.00317346 | 0.00033962 | 0.00016569 | 0.00029892 |
| 0.77900045 | 0.34718355 | 0.00349264 | 0.00043838 | 0.00491031 | 0.0023977  |
| 0.00720564 | 0.38166914 | 0.00093283 | 0.00583727 | 7.46E-05   | 0.00275295 |
| 0.23287036 | 0.68928029 | 0.01474421 | 0.00400479 | 0.00135919 | 0.00358179 |
| 0.48235527 | 0.09506459 | 0.00574448 | 0.00390324 | 0.00277554 | 0.0006447  |
| 0.81578973 | NA         | 0.00258777 | 0.0003458  | 0.00258777 | 0.0003458  |
| 0.12794764 | 0.95925144 | 0.00105191 | 0.00021959 | 0.00058004 | 0.00354018 |
| 0.23716246 | 0.92971117 | 0.01334736 | 0.0026731  | 0.00082635 | 0.0028157  |
| 0.89716694 | 0.07758071 | 0.00317039 | 0.00133488 | 0.00240847 | 0.00026336 |
| 0.947462   | 0.14927033 | 0.00597397 | 0.00149792 | 0.00280919 | 0.00053265 |
| 0.53129402 | 0.82077191 | 0.04298615 | 0.00640215 | 0.00447841 | 0.00656676 |
| 0.26577198 | NA         | 0.00086792 | 0.0003143  | 0.00086792 | 0.0003143  |
| 0.55465086 | 0.04304511 | 0.00272414 | 0.00291188 | 0.00181013 | 0.00017799 |
| 0.92548917 | 0.34453908 | 0.01166481 | 0.00162843 | 0.0035238  | 0.0014587  |
| 0.9685615  | 0.9832812  | 0.0138135  | 0.00074952 | 0.00169239 | 0.00171543 |
| 0.81670091 | 0.85213567 | 0.02985265 | 0.00264223 | 0.003201   | 0.003324   |
| 0.53013629 | 0.43115204 | 0.01771195 | 0.00367321 | 0.00343102 | 0.00285552 |
| 0.89594892 | 0.36592479 | 0.0177461  | 0.00267252 | 0.00284411 | 0.00127631 |

|            |            |            |            |            |            |
|------------|------------|------------|------------|------------|------------|
| 0.35875296 | 0.88205081 | 0.01366841 | 0.00199402 | 0.00085059 | 0.00191062 |
| 0.5342653  | 0.95827353 | 0.03938181 | 0.00496171 | 0.00408373 | 0.00683051 |
| 0.09254339 | 0.52970767 | 0.00152    | 0.00077655 | 0.00018942 | 0.0009274  |
| 0.86567001 | 0.85418519 | 0.00861869 | 0.00052481 | 0.00047357 | 0.00046785 |
| 0.86769222 | 0.85440814 | 0.00652696 | 0.00037227 | 0.00033651 | 0.00033181 |
| 0.87204737 | 0.85455211 | 0.0071008  | 0.00041077 | 0.00037297 | 0.00036614 |
| 0.80346542 | 0.89930472 | 0.02820379 | 0.00237527 | 0.00480605 | 0.0053078  |
| 0.54908167 | 0.24870804 | 0.00626884 | 0.00163773 | 0.00427702 | 0.00211555 |
| 0.23031674 | 0.79661406 | 0.00390009 | 0.00071131 | 0.0002196  | 0.00068033 |
| 0.69372757 | 0.17043953 | 0.00167949 | 0.00039209 | 0.00136997 | 0.00038438 |
| 0.75182273 | 0.96212523 | 0.02498312 | 0.00203155 | 0.00249462 | 0.00310697 |
| 0.86265101 | 0.38654784 | 0.00910911 | 0.00115466 | 0.00546629 | 0.00268548 |
| 0.97318453 | 0.55002521 | 0.0401516  | 0.00489227 | 0.00486847 | 0.00293714 |
| 0.80160963 | 0.11005923 | 0.00500852 | 0.00185275 | 0.00153181 | 0.0002531  |
| 0.34758336 | 0.88048952 | 0.01028253 | 0.0014469  | 0.00058887 | 0.00136355 |
| 0.98859242 | 0.99102397 | 0.06505638 | 0.00544162 | 0.00664244 | 0.00665676 |
| 0.99262748 | 0.99020552 | 0.06531017 | 0.0054547  | 0.00666549 | 0.00665123 |
| 0.77483282 | 0.08912334 | 0.00184643 | 0.00071393 | 0.0007113  | 9.85E-05   |
| 0.60773815 | 0.81331618 | 0.03215618 | 0.00393942 | 0.00430543 | 0.00556659 |
| 0.89010818 | 0.2856107  | 0.00149998 | 0.0001705  | 0.00152922 | 0.00054782 |
| 0.82487393 | 0.29548541 | 0.0012456  | 0.00014251 | 0.00109645 | 0.00043257 |
| 0.7202957  | 0.47337361 | 0.02665275 | 0.00430524 | 0.00476135 | 0.00328393 |
| 0.04413915 | 0.92829409 | 0.00835645 | 0.00671692 | 0.00043238 | 0.00661118 |
| 0.26095502 | 0.33080547 | 0.00514404 | 0.00195011 | 0.0010311  | 0.00127671 |
| 0.46155099 | 0.39207837 | 0.0113909  | 0.0026243  | 0.00250838 | 0.00216857 |
| 0.79348074 | 0.67705241 | 0.03058389 | 0.00343089 | 0.00578747 | 0.00503309 |
| 0.85167571 | 0.03126826 | 0.00531817 | 0.00575794 | 0.00610539 | 0.00031445 |
| 0.97492882 | 0.46966939 | 0.04371446 | 0.0062692  | 0.00744201 | 0.0039134  |
| 0.43405056 | 0.36615641 | 0.00357263 | 0.00072979 | 0.00102188 | 0.0008764  |
| 0.85287839 | 0.54777217 | 0.03530263 | 0.00466942 | 0.00490594 | 0.00331597 |
| 0.42092387 | 0.80965767 | 0.02853421 | 0.0046967  | 0.00368199 | 0.0065545  |
| 0.00552258 | 0.10265936 | 0.00014165 | 0.00297962 | 4.02E-05   | 0.00058896 |
| 0.12673003 | 0.03576202 | 0.00033584 | 0.00119868 | 0.00058973 | 0.00018588 |
| 0.46058159 | 0.59844771 | 0.02244725 | 0.00418373 | 0.00339893 | 0.00428591 |
| 0.19455855 | 0.05461026 | 0.00302786 | 0.00672306 | 0.00183023 | 0.00058199 |
| 0.80178022 | 0.03953058 | 0.00100244 | 0.00071303 | 0.00070303 | 4.45E-05   |
| 0.95409602 | 0.46144523 | 0.00251428 | 0.00018979 | 0.00250671 | 0.00130799 |
| 0.93532185 | 0.36456705 | 0.03443272 | 0.00596679 | 0.00744122 | 0.00324298 |
| 0.99685678 | 0.03669293 | 0.00279902 | 0.00205419 | 0.00650527 | 0.00033669 |
| 0.16725083 | 0.89267421 | 0.00831488 | 0.00212501 | 0.00054095 | 0.00244409 |
| 0.09643086 | 0.7963908  | 0.01018833 | 0.00489993 | 0.00063595 | 0.00421903 |

|            |            |            |            |            |            |
|------------|------------|------------|------------|------------|------------|
| 0.24850333 | 0.27907063 | 0.00162491 | 0.00061281 | 0.00117282 | 0.00130189 |
| 0.62574128 | 0.40105372 | 5.68E-05   | 4.00E-06   | 9.22E-06   | 6.08E-06   |
| 0.24226482 | 0.00656213 | 9.12E-05   | 0.00072985 | 0.00061881 | 2.24E-05   |
| 0.0304999  | 0.46046211 | 0.00150362 | 0.00235888 | 0.0002024  | 0.00236382 |
| 0.73646634 | 0.53805249 | 0.02584251 | 0.00362436 | 0.00564636 | 0.00428132 |
| 0.25751994 | 0.1071835  | 0.00212676 | 0.0019212  | 0.00162487 | 0.00073745 |
| 0.30025455 | 0.5512276  | 0.00967062 | 0.00232769 | 0.00103968 | 0.00179492 |
| 0.75962348 | 0.79409181 | 0.00270997 | 0.00015545 | 0.00291306 | 0.00303029 |
| 0.68472614 | 0.65522899 | 0.01769585 | 0.00201281 | 0.00209646 | 0.00201554 |
| 0.52518182 | 0.21773555 | 0.00242393 | 0.00062165 | 0.00144149 | 0.00065117 |
| 0.13411387 | 0.61412629 | 0.00444526 | 0.00171029 | 0.00037234 | 0.00147587 |
| 0.64315958 | 0.31130003 | 0.00120003 | 0.00016345 | 0.00030866 | 0.0001588  |
| 0.97307456 | 0.36711351 | 0.01480445 | 0.00197527 | 0.00402445 | 0.0016889  |
| 0.57831731 | 0.37673329 | 0.01205704 | 0.00238442 | 0.00209562 | 0.00142733 |
| 0.2249196  | 0.81979013 | 0.01999467 | 0.00516277 | 0.00144594 | 0.00457636 |
| 0.24086027 | 0.10108376 | 0.00603267 | 0.00721865 | 0.00206147 | 0.00094483 |
| 0.90460644 | 0.19955243 | 0.01557607 | 0.00386165 | 0.00444225 | 0.00115288 |
| 0.43200594 | 0.08175226 | 0.00424352 | 0.00344542 | 0.00303946 | 0.00068167 |
| 0.42109699 | 0.07536783 | 0.00367196 | 0.00319893 | 0.00280095 | 0.00059626 |
| 0.61857634 | 0.29877933 | 0.01076889 | 0.00240476 | 0.00484506 | 0.00254138 |
| 0.48849712 | 0.03230335 | 0.00058545 | 0.00072595 | 0.00225664 | 0.00019269 |
| 0.31050912 | 0.06726389 | 0.00026497 | 0.00022927 | 0.00024672 | 6.04E-05   |
| 0.34743199 | 0.98605279 | 0.01886943 | 0.00277488 | 0.00183922 | 0.00465009 |
| 0.64428596 | 0.01508257 | 0.00038549 | 0.00070245 | 0.00056126 | 1.77E-05   |
| 0.59427569 | 0.08163912 | 0.00172609 | 0.0009084  | 0.00073804 | 0.00012043 |
| 0.40400474 | 0.28202352 | 0.00826403 | 0.00268449 | 0.00222234 | 0.00161102 |
| 0.40850391 | 0.75905432 | 0.00356617 | 0.00039682 | 0.00059109 | 0.0010354  |
| 0.87672869 | 0.7296785  | 0.01475078 | 0.00116552 | 0.00123519 | 0.00104689 |
| 0.57970377 | 0.43973743 | 0.01086283 | 0.00182336 | 0.00132973 | 0.00103678 |
| 0.4289784  | 0.87641034 | 0.00266996 | 0.0002356  | 0.00023555 | 0.00045215 |
| 0.26542512 | 0.55399126 | 0.00226216 | 0.00045606 | 0.00030336 | 0.00059282 |
| 0.08331432 | 0.554427   | 0.00068439 | 0.00032669 | 5.77E-05   | 0.00032941 |
| 0.58282401 | 0.22324855 | 0.00854746 | 0.00248405 | 0.00436642 | 0.00185952 |
| 0.78865522 | 0.60791128 | 0.0240799  | 0.00279771 | 0.00363803 | 0.00288731 |
| 0.1306752  | 0.48470727 | 0.0011436  | 0.00044264 | 0.00024887 | 0.00082027 |
| 0.99476186 | 0.51188092 | 0.00781506 | 0.00065292 | 0.00072169 | 0.00039466 |
| 0.12633273 | 0.59801692 | 0.00755757 | 0.00347423 | 0.00077586 | 0.00312959 |
| 0.95092579 | NA         | 0.01436866 | 0.00331837 | 0.00408276 | 0.0004958  |
| 0.31300046 | 0.37323664 | 0.01363509 | 0.0048182  | 0.00199068 | 0.00232965 |
| 0.46238391 | 0.33433789 | 0.00678037 | 0.00161025 | 0.00140702 | 0.00105086 |
| 0.65466938 | 0.09395077 | 0.00860323 | 0.00486547 | 0.00338373 | 0.00059186 |

|            |            |            |            |            |            |
|------------|------------|------------|------------|------------|------------|
| 0.54924028 | 0.55582461 | 0.0067695  | 0.0008709  | 0.00270584 | 0.0027347  |
| 0.024285   | 0.5404107  | 0.00062637 | 0.00092587 | 0.00019031 | 0.00314523 |
| 0.09396952 | 0.44019169 | 0.00084116 | 0.00045776 | 0.00044747 | 0.00180507 |
| 0.30068559 | 0.48044739 | 0.01577932 | 0.00477765 | 0.0018941  | 0.00287752 |
| 0.41360913 | 0.02846457 | 0.00037366 | 0.00056989 | 0.00037312 | 3.17E-05   |
| 0.45512033 | 0.61977892 | 0.02195652 | 0.00398695 | 0.00323335 | 0.00425076 |
| 0.38072386 | 0.19755944 | 0.01001496 | 0.00488863 | 0.00223663 | 0.00124215 |
| 0.94612411 | 0.58394268 | 0.02079365 | 0.00204716 | 0.00665385 | 0.00435123 |
| 0.65255465 | 0.51663251 | 0.03182109 | 0.00544836 | 0.00392085 | 0.00318745 |
| 0.66918651 | 0.24813571 | 0.0015131  | 0.0002545  | 0.0039572  | 0.00163476 |
| 0.14460176 | 0.34149853 | 0.00438402 | 0.00265741 | 0.00085628 | 0.00185521 |
| 0.70261482 | 0.1882872  | 0.01536499 | 0.00499719 | 0.00478342 | 0.00148091 |
| 0.38009913 | 0.05954358 | 0.00258613 | 0.0028754  | 0.00235903 | 0.00044339 |
| 0.16792955 | 0.1086405  | 0.00160215 | 0.00200799 | 0.0007819  | 0.00052681 |
| 0.46529385 | 0.17091827 | 0.00592839 | 0.00248433 | 0.00219531 | 0.00089272 |
| 0.84774235 | 0.48761487 | 0.00571508 | 0.00053892 | 0.00123277 | 0.00074829 |
| 0.65368166 | 0.63912548 | 0.01121282 | 0.00121668 | 0.00212253 | 0.00208024 |
| 0.0545645  | 0.28661436 | 0.00242919 | 0.00371418 | 0.00049768 | 0.00222014 |
| 0.99047841 | 0.88377743 | 0.03975407 | 0.00312463 | 0.00401819 | 0.00363242 |
| 0.55354489 | 0.66289962 | 0.04095966 | 0.00699572 | 0.00422644 | 0.00495553 |
| 0.67164269 | 0.03428336 | 0.00026269 | 0.00020764 | 0.00535603 | 0.00037078 |
| 0.90055965 | 0.4906575  | 0.00393669 | 0.00032343 | 0.00101488 | 0.00058581 |
| 0.49887685 | 0.42609326 | 0.00015768 | 1.49E-05   | 0.00028011 | 0.00024248 |
| 0.19119685 | 0.74012387 | 0.01081001 | 0.0030643  | 0.00089232 | 0.00300286 |
| 0.66943311 | 0.88259141 | 0.01713078 | 0.00151006 | 0.00481399 | 0.00613978 |
| 0.0340652  | 0.59130288 | 0.00147008 | 0.00166495 | 9.18E-05   | 0.00123991 |
| 0.02584599 | 0.63535414 | 0.00091642 | 0.00116543 | 4.88E-05   | 0.00091625 |
| 0.50216927 | 0.68810081 | 0.01626111 | 0.00228685 | 0.00273756 | 0.00362145 |
| 0.89198481 | 0.96708935 | 0.00154228 | 5.71E-05   | 0.00340411 | 0.00365707 |
| 0.18908936 | 0.84444603 | 0.01142664 | 0.00294477 | 0.00168562 | 0.00636075 |
| 0.87182758 | 0.90134058 | 0.01485469 | 0.0009768  | 0.00575082 | 0.00592156 |
| 0.71008195 | 0.53590249 | 0.0363308  | 0.00580483 | 0.00430345 | 0.00335412 |
| 0.73700378 | 0.55913112 | 0.03641087 | 0.0054275  | 0.00421505 | 0.00330019 |
| 0.51683115 | 0.96302942 | 0.00432733 | 0.00032513 | 0.00157796 | 0.00275213 |
| 0.05608575 | 0.69843068 | 0.00174222 | 0.00111375 | 0.00046151 | 0.00443979 |
| 0.38449728 | 0.41375903 | 0.00711757 | 0.00166391 | 0.00140888 | 0.00150482 |
| 0.31498332 | 0.89730733 | 0.01530666 | 0.00253764 | 0.00282317 | 0.00711478 |
| 0.54988732 | 0.0368828  | 0.00221283 | 0.0026482  | 0.00160992 | 0.00013805 |
| 0.09523717 | 0.52067586 | 0.0018427  | 0.00096091 | 0.00012051 | 0.00056972 |
| 0.83688747 | 0.35417104 | 0.01264057 | 0.00191955 | 0.0032877  | 0.00152572 |
| 0.73271163 | 0.52635791 | 0.00696469 | 0.00072969 | 0.00116243 | 0.00086249 |



|            |            |            |            |            |            |
|------------|------------|------------|------------|------------|------------|
| 0.12745031 | 0.95903637 | 0.00104072 | 0.0002177  | 0.00057687 | 0.00353273 |
| 0.08457617 | 0.94230686 | 0.00062005 | 0.00017704 | 0.0003174  | 0.00279482 |
| 0.12954409 | 0.95834492 | 0.00086865 | 0.00017399 | 0.00047282 | 0.00286493 |
| 0.42925629 | 0.5129013  | 0.00863367 | 0.00157084 | 0.00179436 | 0.00210418 |
| 0.79353777 | 0.03425012 | 0.00256713 | 0.00242203 | 0.00354159 | 0.00020733 |
| 0.66309597 | 0.80066464 | 0.03709972 | 0.00444729 | 0.00396512 | 0.00468391 |
| 0.79805669 | 0.81099493 | 0.03714914 | 0.00373898 | 0.00593939 | 0.0060239  |
| 0.1409581  | 0.50312509 | 0.00128085 | 0.00045542 | 0.00026974 | 0.00085787 |
| 0.15036985 | 0.40757024 | 0.00034782 | 0.00011621 | 0.00011952 | 0.00029824 |
| 0.14938035 | 0.40741392 | 0.0003832  | 0.00013064 | 0.00013354 | 0.00033485 |
| 0.15236295 | 0.4016917  | 0.00037734 | 0.0001277  | 0.00013301 | 0.00032336 |
| 0.15419169 | 0.39713538 | 0.00036967 | 0.00012468 | 0.00013136 | 0.00031263 |
| 0.81324171 | 0.29067782 | 0.02854921 | 0.00648413 | 0.00564569 | 0.00226831 |
| 0.46919876 | 0.95526041 | 0.01312086 | 0.00138732 | 0.00222429 | 0.00418391 |
| 0.82837545 | NA         | 0.00249107 | 0.0003263  | 0.00249107 | 0.0003263  |
| 0.81752505 | 0.67749988 | 0.01180904 | 0.00100612 | 0.00398991 | 0.00337804 |
| 0.04599455 | 0.43988972 | 0.00031024 | 0.00028209 | 8.12E-05   | 0.00064157 |
| 0.25025003 | 0.36049051 | 0.00224571 | 0.00070458 | 0.00041239 | 0.00057472 |
| 0.26598078 | 0.6159365  | 0.01959626 | 0.00558762 | 0.00203597 | 0.00429543 |
| 0.75269485 | 0.39949659 | 0.02112522 | 0.00358933 | 0.00346874 | 0.00197292 |
| 0.08365827 | 0.99931413 | 0.00532557 | 0.00209133 | 0.00052436 | 0.00484431 |
| 0.42933259 | 0.10112123 | 0.00043859 | 0.00020782 | 0.00227073 | 0.0006178  |
| 0.8051748  | 0.42748872 | 0.01248949 | 0.0016542  | 0.00142673 | 0.00080623 |
| 0.61411659 | 0.82253533 | 0.05354443 | 0.00750391 | 0.00495619 | 0.0064084  |
| 0.2740844  | 0.09937699 | 0.00434258 | 0.00445468 | 0.00147006 | 0.00058816 |
| 0.30726481 | 0.22337859 | 0.00062249 | 0.00020396 | 0.00135659 | 0.00101801 |
| 0.31050688 | 0.21835852 | 0.00068602 | 0.00023064 | 0.00149727 | 0.00109082 |
| 0.23123849 | 0.7610538  | 0.00197332 | 0.00032965 | 0.00032713 | 0.00096479 |
| 0.65176478 | 0.2335072  | 0.00194812 | 0.00037071 | 0.00066157 | 0.00025978 |
| 0.3016429  | 0.09932748 | 0.00104062 | 0.00078317 | 0.00138763 | 0.00050836 |
| 0.62225663 | 0.2987342  | 0.00886271 | 0.00188719 | 0.00380742 | 0.00198137 |
| 0.09417087 | 0.23354618 | 0.00015745 | 0.00012161 | 2.98E-05   | 6.91E-05   |
| 0.18993852 | 0.15934097 | 0.00015714 | 9.04E-05   | 4.15E-05   | 3.52E-05   |
| 0.23225193 | 0.05797304 | 0.00021959 | 0.00027727 | 0.00067515 | 0.00019045 |
| 0.20385796 | 0.52679615 | 0.00939055 | 0.00330108 | 0.00148991 | 0.00347677 |
| 0.87376214 | 0.24159446 | 0.01956411 | 0.00445969 | 0.00537058 | 0.00171361 |
| 0.58481908 | 0.17355269 | 0.00207018 | 0.00057554 | 0.00063647 | 0.00021026 |
| 0.7205025  | 0.27508645 | 0.00240324 | 0.00037319 | 0.00071563 | 0.00029804 |
| 0.85060575 | 0.29466607 | 0.00784152 | 0.00124372 | 0.00193075 | 0.00074348 |
| 0.71685356 | 0.61083817 | 0.00091409 | 5.78E-05   | 0.00029845 | 0.00025783 |
| 0.5272008  | 0.52181041 | 0.02296752 | 0.00431329 | 0.00409048 | 0.00405347 |

|            |            |            |            |            |            |
|------------|------------|------------|------------|------------|------------|
| 0.56939227 | 0.87076639 | 0.01801798 | 0.00188279 | 0.0041741  | 0.00606937 |
| 0.32345577 | 0.71012551 | 0.00623914 | 0.0010201  | 0.0007942  | 0.00161288 |
| 0.69096254 | 0.63136099 | 0.00111683 | 7.33E-05   | 0.00036568 | 0.00033679 |
| 0.05497313 | 0.07961449 | 0.00026949 | 0.00096793 | 0.00045334 | 0.00063465 |
| 0.67256234 | 0.91422476 | 0.03551645 | 0.00369115 | 0.00367788 | 0.00482456 |
| 0.41209055 | 0.93180384 | 0.03067873 | 0.00463637 | 0.00273621 | 0.00563295 |
| 0.45545304 | 0.31195682 | 0.01570227 | 0.00481915 | 0.00370699 | 0.00264863 |
| 0.28560269 | 0.20314265 | 0.00372179 | 0.00189789 | 0.00185867 | 0.00136923 |
| 0.19885751 | 0.05897627 | 0.00030604 | 0.00045677 | 0.00020767 | 6.79E-05   |
| 0.53773445 | 0.80669673 | 0.01489428 | 0.00167254 | 0.00300176 | 0.00430038 |
| 0.35386241 | 0.64396074 | 0.00509382 | 0.00080478 | 0.00032721 | 0.00056437 |
| 0.0699186  | 0.1703607  | 0.00076097 | 0.00125975 | 0.00029454 | 0.00066246 |
| 0.06996757 | 0.16980287 | 0.00077412 | 0.00128745 | 0.00029117 | 0.00065259 |
| 0.74869801 | 0.58141222 | 0.00129459 | 8.74E-05   | 0.00036342 | 0.00028851 |
| 0.75884837 | 0.59824289 | 0.00109098 | 6.88E-05   | 0.00037144 | 0.00029897 |
| 0.37629986 | 0.69572499 | 0.01978098 | 0.00373749 | 0.00234951 | 0.00405628 |
| 0.49522367 | 0.37820259 | 0.01695602 | 0.00415078 | 0.00405531 | 0.00319337 |
| 0.05608575 | 0.69803963 | 0.00187252 | 0.00121145 | 0.00046151 | 0.00443759 |
| 0.01272415 | 0.87659177 | 0.00279025 | 0.00586709 | 0.00011936 | 0.00545279 |
| 0.53871476 | 0.02841138 | 0.00043377 | 0.00053141 | 0.00104864 | 7.13E-05   |
| 0.49423013 | 0.09835904 | 0.00330073 | 0.00193108 | 0.00127227 | 0.00029422 |
| 0.08330092 | 0.17046148 | 0.00309636 | 0.00534664 | 0.00065607 | 0.00125268 |
| 0.8843659  | 0.76780535 | 0.03345073 | 0.00312783 | 0.00391278 | 0.00345221 |
| 0.40627501 | 0.16843171 | 0.00292911 | 0.00123507 | 0.00279565 | 0.00127132 |
| 0.6216866  | 0.04224686 | 0.00074349 | 0.00060045 | 0.00185461 | 0.00016153 |
| 0.20580827 | 0.86031755 | 0.01266383 | 0.00304607 | 0.00129995 | 0.00465224 |
| 0.25942432 | 0.93585886 | 0.01379291 | 0.00255461 | 0.00147278 | 0.00461764 |
| 0.8693161  | 0.85046035 | 0.01196457 | 0.00078775 | 0.00151314 | 0.00148364 |
| 0.61954939 | 0.48366138 | 0.01062216 | 0.00153457 | 0.00246671 | 0.00197735 |
| 0.00272071 | 0.95733928 | 0.00049651 | 0.00303985 | 1.76E-05   | 0.0037145  |
| 0.63069431 | 0.09985082 | 0.00533485 | 0.00269827 | 0.00479829 | 0.00092484 |
| 0.6381154  | 0.09982869 | 0.00516254 | 0.00256894 | 0.00462097 | 0.00088033 |
| 0.65649201 | 0.09981567 | 0.00534453 | 0.00261004 | 0.00481973 | 0.00089574 |
| 0.76155018 | 0.4494651  | 0.00592184 | 0.0006677  | 0.00152047 | 0.00094582 |
| 0.83883655 | 0.44451774 | 0.00761159 | 0.00083826 | 0.0022088  | 0.00124998 |
| 0.847152   | 0.44918158 | 0.01167548 | 0.00139103 | 0.00372063 | 0.00211558 |
| 0.70322592 | 0.65686283 | 0.00401544 | 0.00031807 | 0.00159881 | 0.00150389 |
| 0.69096254 | 0.64896885 | 0.00257709 | 0.00019219 | 0.00094543 | 0.00089338 |
| 0.69096254 | 0.64751526 | 0.00231817 | 0.00016978 | 0.00083676 | 0.00078903 |
| 0.69066787 | 0.6265467  | 0.00088451 | 5.62E-05   | 0.0002821  | 0.00025805 |
| 0.69354903 | 0.61645804 | 0.0009958  | 6.53E-05   | 0.00032769 | 0.00029426 |

|            |            |            |            |            |            |
|------------|------------|------------|------------|------------|------------|
| 0.70403014 | 0.61564865 | 0.00087979 | 5.58E-05   | 0.00028387 | 0.0002511  |
| 0.0315176  | 0.28055061 | 0.00059698 | 0.0012519  | 0.00030935 | 0.00223134 |
| 0.23263054 | 0.1151985  | 0.00564595 | 0.00614127 | 0.001766   | 0.00093854 |
| 0.39909796 | 0.73194199 | 0.00801271 | 0.00111237 | 0.00256935 | 0.0044009  |
| 0.43834771 | 0.68471275 | 0.00500814 | 0.00061439 | 0.0018501  | 0.00275495 |
| 0.51492728 | 0.84144835 | 0.00512917 | 0.00045299 | 0.00187225 | 0.00290189 |
| 0.6384043  | 0.87337422 | 0.00965326 | 0.00077954 | 0.00295794 | 0.00390608 |
| 0.43834771 | 0.68365107 | 0.00685282 | 0.00089885 | 0.00269263 | 0.00399499 |
| 0.43122841 | 0.77557756 | 0.00123848 | 0.0001058  | 5.25E-05   | 9.03E-05   |
| 0.93728643 | 0.33281416 | 0.00752662 | 0.0009715  | 0.0035936  | 0.0014261  |
| 0.6143735  | 0.5410263  | 0.01524436 | 0.00218474 | 0.0015255  | 0.00136087 |
| 0.71570242 | 0.13904485 | 0.00380188 | 0.00119904 | 0.00318391 | 0.00073192 |
| 0.70789579 | 0.67530815 | 0.0041716  | 0.00032275 | 0.00164341 | 0.00157539 |
| 0.69101218 | 0.63996415 | 0.00139819 | 9.43E-05   | 0.00046882 | 0.00043719 |
| 0.00374081 | 0.3103789  | 0.00024742 | 0.00289317 | 2.65E-05   | 0.00151388 |
| 0.77943694 | 0.67283016 | 0.02694214 | 0.00298007 | 0.00383938 | 0.00337009 |
| 0.88536165 | 0.46861557 | 0.01426401 | 0.00164949 | 0.00692941 | 0.00395724 |
| 0.87405178 | 0.48862449 | 0.01269981 | 0.00139141 | 0.00581831 | 0.00348169 |
| 0.74431053 | 0.60504832 | 0.01738898 | 0.00196255 | 0.00366256 | 0.00304751 |
| 0.55832422 | 0.70998437 | 0.01405372 | 0.00168689 | 0.00275017 | 0.00340491 |
| 0.56384104 | 0.71153418 | 0.0141843  | 0.00168811 | 0.00277708 | 0.00341486 |
| 0.27641525 | 0.44620428 | 0.00149545 | 0.0003294  | 0.0002501  | 0.00038728 |
| 0.33728174 | 0.37940127 | 0.00124891 | 0.00025811 | 0.00023407 | 0.00026068 |
| 0.88429805 | 0.93774161 | 0.0534045  | 0.00483851 | 0.00489461 | 0.0051544  |
| 0.61244957 | 0.46643545 | 0.01138651 | 0.00174449 | 0.00155767 | 0.00121948 |
| 0.60171355 | 0.49261427 | 0.0130055  | 0.00198809 | 0.00174686 | 0.00145989 |
| 0.56388561 | 0.58339328 | 0.01480524 | 0.00212645 | 0.0017655  | 0.00182011 |
| 0.46777898 | 0.63043251 | 0.00301761 | 0.00034031 | 0.00241545 | 0.00315033 |
| 0.17322123 | 0.03965301 | 0.00088302 | 0.00244062 | 0.0011895  | 0.00031228 |
| 0.68317524 | 0.38253055 | 0.00162705 | 0.00018292 | 0.00255746 | 0.0015224  |
| 0.79876663 | 0.38620341 | 0.00563619 | 0.00069109 | 0.00143982 | 0.00074762 |
| 0.23306516 | 0.76508971 | 0.00369564 | 0.00068456 | 0.00069192 | 0.00201764 |
| 0.23301991 | 0.76514298 | 0.00414482 | 0.00078496 | 0.00078567 | 0.00228771 |
| 0.78172368 | 0.82519102 | 0.00374918 | 0.00021578 | 0.00170264 | 0.00178722 |
| 0.96983548 | 0.3601341  | 0.02291202 | 0.003481   | 0.00724585 | 0.0030235  |
| 0.63344502 | 0.53735444 | 0.01412632 | 0.00194589 | 0.0016759  | 0.00144589 |
| 0.63344502 | 0.53735444 | 0.01412632 | 0.00194589 | 0.0016759  | 0.00144589 |
| 0.71309668 | 0.54475666 | 0.02936366 | 0.00433955 | 0.00439209 | 0.00346059 |
| 0.83707643 | 0.30208782 | 0.00882536 | 0.00142476 | 0.00260961 | 0.00104651 |
| 0.3901884  | 0.85721279 | 0.00839065 | 0.00104146 | 0.00200289 | 0.00403411 |
| 0.43303251 | 0.55505081 | 0.00715093 | 0.00115486 | 0.00271564 | 0.00338608 |

|            |            |            |            |            |            |
|------------|------------|------------|------------|------------|------------|
| 0.78265697 | 0.80496559 | 0.00051555 | 2.11E-05   | 0.00269787 | 0.00276623 |
| 0.01425994 | 0.00234588 | 1.85E-05   | 0.00417209 | 0.00012969 | 2.44E-05   |
| 0.38368944 | 0.74202609 | 0.00754382 | 0.0010579  | 0.00083829 | 0.00151866 |
| 0.82408961 | 0.96570626 | 0.00890499 | 0.00051109 | 0.00450251 | 0.00517838 |
| 0.12696274 | 0.63605359 | 0.00448437 | 0.00175894 | 0.00078455 | 0.00332733 |
| 0.83124201 | 0.54813726 | 0.00303294 | 0.00023004 | 0.00068545 | 0.00046967 |
| 0.26462084 | 0.30838562 | 0.00240204 | 0.00083486 | 0.00232889 | 0.00266935 |
| 0.72108968 | 0.77703381 | 0.00775375 | 0.00059292 | 0.00183228 | 0.001959   |
| 0.74966383 | 0.12373461 | 0.00353793 | 0.00117316 | 0.00172037 | 0.00033707 |
| 0.40848845 | 0.55625895 | 0.02413649 | 0.00543388 | 0.00341069 | 0.0044827  |
| 0.25515226 | 0.28595102 | 0.00188702 | 0.00069667 | 0.00156297 | 0.00173113 |
| 0.67622973 | 0.75337598 | 0.01258593 | 0.00117408 | 0.00331697 | 0.00365049 |
| 0.34723155 | 0.69042546 | 0.01955188 | 0.00398216 | 0.00218941 | 0.00403371 |
| 0.41209055 | 0.93182362 | 0.03158542 | 0.00481215 | 0.00284088 | 0.00584587 |
| 0.7547454  | 0.32485352 | 0.0024633  | 0.00031647 | 0.00215973 | 0.00101316 |
| 0.26202494 | 0.39511534 | 0.00126428 | 0.00031775 | 0.00139791 | 0.00202015 |
| 0.2620001  | 0.43088197 | 0.00214843 | 0.00054578 | 0.00213097 | 0.00331891 |
| 0.6460617  | 0.09412805 | 0.01017205 | 0.00600549 | 0.00413537 | 0.00073675 |
| 0.42607582 | 0.99039789 | 0.00280394 | 0.00022469 | 0.00013242 | 0.00028695 |
| 0.35429794 | 0.83981732 | 0.0217913  | 0.00376697 | 0.00151192 | 0.00326737 |
| 0.82667846 | 0.19061252 | 0.00156473 | 0.00027769 | 0.0003987  | 0.00010392 |
| 0.4072372  | 0.77976564 | 0.00323256 | 0.0003453  | 0.00016747 | 0.00030359 |
| 0.35767918 | 0.869108   | 0.01408106 | 0.00210196 | 0.00085838 | 0.00190772 |
| 0.32970319 | 0.89696056 | 0.01380279 | 0.00214418 | 0.00082178 | 0.00202157 |
| 0.35822794 | 0.88619747 | 0.0152211  | 0.00227196 | 0.00097023 | 0.00218844 |
| 0.5315523  | 0.94716972 | 0.03807342 | 0.00481965 | 0.0039433  | 0.00655992 |
| 0.64575585 | 0.87781651 | 0.02664199 | 0.0027413  | 0.00223252 | 0.00293504 |
| 0.70259447 | 0.61451114 | 0.01456445 | 0.00163343 | 0.00515379 | 0.00457958 |
| 0.72887315 | 0.21171394 | 0.01196107 | 0.00320972 | 0.00484019 | 0.0016112  |
| 0.90754154 | 0.44234856 | 0.02531625 | 0.00349046 | 0.00661328 | 0.00350897 |
| 0.22073234 | 0.21302154 | 0.00257775 | 0.00149012 | 0.00075272 | 0.00072887 |
| 0.77067726 | 0.58490474 | 0.03856292 | 0.00540137 | 0.00549342 | 0.00430739 |
| 0.76879399 | 0.58593377 | 0.0387342  | 0.00543573 | 0.00551482 | 0.00434033 |
| 0.83511437 | 0.61907077 | 0.01466072 | 0.00140094 | 0.00169933 | 0.00129882 |
| 0.95125251 | 0.66862119 | 0.0029303  | 0.00016259 | 0.00034711 | 0.00025152 |
| 0.81396652 | 0.55620152 | 0.00704026 | 0.00063938 | 0.00136284 | 0.00096712 |
| 0.72284036 | 0.2440796  | 0.01961834 | 0.0052421  | 0.00581711 | 0.00222249 |
| 0.59806443 | 0.4563143  | 0.00677415 | 0.00096451 | 0.00157762 | 0.00123718 |
| 0.26638908 | 0.34492984 | 0.01658252 | 0.00755503 | 0.00240248 | 0.00302398 |
| 0.02085804 | 0.13098313 | 0.00015238 | 0.00078718 | 0.00014914 | 0.00079693 |
| 0.98682728 | 0.28098316 | 0.0022064  | 0.00024822 | 0.00230519 | 0.000745   |

|            |            |            |            |            |            |
|------------|------------|------------|------------|------------|------------|
| 0.81047849 | 0.74160471 | 0.01810823 | 0.00159447 | 0.00313874 | 0.00290049 |
| 0.41923106 | 0.42717104 | 0.00308108 | 0.00054933 | 0.00272911 | 0.00277507 |
| 0.5599659  | 0.42001477 | 0.02655371 | 0.00594396 | 0.00396903 | 0.00307557 |
| 0.81058719 | 0.74276636 | 0.01856565 | 0.00164286 | 0.00325297 | 0.00301001 |
| 0.50066877 | 0.97791646 | 0.04042745 | 0.0053394  | 0.00302626 | 0.00547112 |
| 0.67924732 | 0.17106833 | 0.00165815 | 0.00039244 | 0.00134182 | 0.00038497 |
| 0.68360592 | 0.1708778  | 0.00166545 | 0.00039257 | 0.0013526  | 0.00038546 |
| 0.66294966 | 0.29325223 | 0.02264721 | 0.00575513 | 0.0041301  | 0.00199927 |
| 0.68640833 | 0.28414511 | 0.00812381 | 0.00162643 | 0.00191529 | 0.00086638 |
| 0.59474504 | 0.45770948 | 0.00676982 | 0.00096595 | 0.00157029 | 0.001241   |
| 0.58432638 | 0.22341789 | 0.00861315 | 0.00249969 | 0.00439939 | 0.0018707  |
| 0.54614865 | 0.65115626 | 0.00706206 | 0.00079864 | 0.00303911 | 0.00355258 |
| 0.42846795 | 0.12928285 | 0.00087309 | 0.00036621 | 0.00345388 | 0.00118327 |
| 0.43881932 | 0.93005104 | 0.01155626 | 0.00128971 | 0.00294261 | 0.00571784 |
| 0.82767912 | 0.21294325 | 0.02588539 | 0.00741329 | 0.0065881  | 0.00197848 |
| 0.94667783 | 0.22536542 | 0.00162386 | 0.0002198  | 0.00049715 | 0.00013379 |
| 0.24799017 | 0.46570879 | 0.00255994 | 0.00065698 | 0.00137521 | 0.00241783 |
| 0.11109192 | 0.50520817 | 0.00109171 | 0.00046829 | 0.00051418 | 0.00201542 |
| 0.81370259 | 0.54155515 | 0.00805437 | 0.00077224 | 0.00150477 | 0.00104318 |
| 0.91200913 | 0.16335617 | 0.00606956 | 0.00145703 | 0.00254287 | 0.00054068 |
| 0.85219198 | 0.69012792 | 0.01737211 | 0.0015432  | 0.00496083 | 0.00411783 |
| 0.26577198 | NA         | 0.00086792 | 0.0003143  | 0.00086792 | 0.0003143  |
| 0.57065568 | 0.71086264 | 0.01139266 | 0.00127414 | 0.0021044  | 0.0025602  |
| 0.93061022 | 0.6789889  | 0.00010309 | 3.31E-06   | 0.00295298 | 0.0022298  |
| 0.62729755 | 0.6417708  | 0.00023728 | 1.31E-05   | 1.34E-05   | 1.37E-05   |
| 0.3943668  | 0.64606638 | 0.00281686 | 0.00035828 | 0.00015702 | 0.00024688 |
| 0.22956447 | 0.97515709 | 0.0172914  | 0.00363162 | 0.00209013 | 0.00751423 |
| 0.82356918 | 0.18990328 | 0.00128872 | 0.00022281 | 0.00031904 | 8.30E-05   |
| 0.85958689 | 0.77236887 | 0.02940958 | 0.00270294 | 0.00493546 | 0.00449087 |
| 0.71487669 | 0.77875312 | 0.02233547 | 0.00222596 | 0.00289378 | 0.00312253 |
| 0.92011289 | 0.38294904 | 0.02182307 | 0.00324841 | 0.00335238 | 0.00153296 |
| 0.94503218 | 0.22378602 | 0.00439584 | 0.00072153 | 0.00162348 | 0.00044157 |
| 0.24785154 | 0.07980608 | 0.00013572 | 0.00011347 | 0.00033147 | 0.00011729 |
| 0.65283568 | 0.63239852 | 0.00904933 | 0.00094472 | 0.00171054 | 0.00166246 |
| NA         | 0.75034794 | 0.00831589 | 0.00220734 | 0.0003114  | 0.00218743 |
| 0.70095601 | 0.0768544  | 0.00113765 | 0.00050978 | 0.00122868 | 0.00016448 |
| 0.06907301 | 0.67675096 | 0.00230786 | 0.00131679 | 0.00045931 | 0.00357427 |
| 0.23031222 | 0.7604231  | 0.00343207 | 0.00063719 | 0.00020645 | 0.0006136  |
| 0.37555552 | 0.54565378 | 0.018302   | 0.004214   | 0.0029688  | 0.00413477 |
| 0.58992746 | 0.95060671 | 0.01073645 | 0.00088427 | 0.00252792 | 0.00386222 |
| 0.20807011 | 0.81538685 | 0.00427004 | 0.0008507  | 0.00097875 | 0.00332483 |

|            |            |            |            |            |            |
|------------|------------|------------|------------|------------|------------|
| 0.41489454 | 0.19196124 | 0.00243719 | 0.00086809 | 0.00065409 | 0.00032442 |
| 0.95169866 | 0.99462865 | 0.06289148 | 0.00535878 | 0.00644426 | 0.00669845 |
| 0.18920645 | 0.73087287 | 0.00436445 | 0.00105021 | 0.0009237  | 0.00310093 |
| 0.47537866 | 0.35835964 | 0.01605413 | 0.00421907 | 0.00397559 | 0.00309441 |
| 0.23929438 | 0.80073212 | 0.00345769 | 0.0005925  | 0.00028973 | 0.00086853 |
| 0.40543357 | 0.94267963 | 0.01968001 | 0.00265364 | 0.00263709 | 0.00556624 |
| 0.93172277 | 0.91309763 | 0.02017532 | 0.00133797 | 0.0067556  | 0.00663708 |
| 0.57983218 | 0.71402656 | 0.01451984 | 0.00168957 | 0.00285267 | 0.0034322  |
| 0.30156455 | 0.0970228  | 0.00262416 | 0.00232636 | 0.00193062 | 0.00069528 |
| 0.8966467  | 0.75197315 | 0.03069323 | 0.00281669 | 0.00594962 | 0.0050963  |
| 0.72937996 | 0.4646369  | 0.00588464 | 0.00066863 | 0.00295589 | 0.00197708 |
| 0.30945059 | 0.90073099 | 0.0154834  | 0.00260614 | 0.00277875 | 0.00713791 |
| 0.48757786 | 0.25674616 | 0.00812461 | 0.00241838 | 0.00230393 | 0.00129683 |
| 0.01237561 | 0.66321759 | 0.00072018 | 0.00165391 | 6.22E-05   | 0.00233478 |
| 0.42225487 | 0.43116183 | 0.00367195 | 0.00066667 | 0.00330426 | 0.00336604 |
| 0.77122731 | 0.42110628 | 0.01472221 | 0.00213604 | 0.00546636 | 0.00320159 |
| 0.17585371 | 0.66786262 | 0.00505302 | 0.00144868 | 0.00110861 | 0.0036551  |
| 0.15547888 | 0.85027952 | 0.00089194 | 0.00016936 | 7.86E-05   | 0.00037361 |
| 0.01191178 | 0.67197749 | 0.00070025 | 0.00163883 | 7.21E-05   | 0.00281814 |
| 0.45916607 | 0.99969819 | 0.01153274 | 0.00115732 | 0.00119904 | 0.00240808 |
| 0.80998666 | 0.11174657 | 0.00295738 | 0.00097077 | 0.00163936 | 0.00027243 |
| 0.73404505 | 0.40256028 | 0.01976419 | 0.0033535  | 0.00316778 | 0.00185391 |
| 0.03275082 | 0.00406321 | 4.59E-05   | 0.003213   | 0.0002244  | 3.27E-05   |
| 0.3971745  | 0.59374952 | 0.00470775 | 0.00070973 | 0.00080041 | 0.00115066 |
| 0.63841814 | 0.15367691 | 0.00013026 | 2.46E-05   | 2.10E-05   | 5.55E-06   |
| 0.3744599  | 0.61545045 | 0.00215644 | 0.00028611 | 0.00017812 | 0.00028077 |
| 0.88985664 | 0.59218545 | 0.02813046 | 0.00313556 | 0.00371129 | 0.00258453 |
| 0.06408188 | 0.93200659 | 0.00544016 | 0.00289485 | 0.00046914 | 0.00517281 |
| 0.35936822 | 0.59649597 | 0.00936968 | 0.0017774  | 0.00174142 | 0.00273818 |
| 0.42263256 | 0.3637211  | 0.01288589 | 0.00352761 | 0.0030021  | 0.00262669 |
| 0.36520882 | 0.42168311 | 0.01431042 | 0.00400467 | 0.00267612 | 0.00304131 |
| 0.71507736 | 0.45702014 | 0.00756073 | 0.00093667 | 0.00119164 | 0.00079557 |
| 0.78368522 | 0.44471798 | 0.00548507 | 0.00059872 | 0.00122511 | 0.00073457 |
| 0.42541068 | 0.16925637 | 0.0021444  | 0.00081862 | 0.00130508 | 0.0005674  |
| 0.41900848 | 0.17123435 | 0.00212517 | 0.00081265 | 0.0012874  | 0.00057342 |
| 0.89965437 | 0.74135421 | 0.03100201 | 0.00288098 | 0.00605615 | 0.00510813 |
| 0.8669261  | 0.9357705  | 0.0553432  | 0.00517275 | 0.00677398 | 0.00724281 |
| 0.73595859 | 0.27813337 | 0.00552117 | 0.00097685 | 0.00542112 | 0.00228784 |
| 0.31759232 | 0.49272053 | 0.01481966 | 0.00412163 | 0.00186325 | 0.00275763 |
| 0.38422867 | 0.83095068 | 0.00684828 | 0.00084815 | 0.0007932  | 0.00158928 |
| 0.37486507 | 0.82142687 | 0.00426089 | 0.00049427 | 0.00053595 | 0.00109006 |

|            |            |            |            |            |            |
|------------|------------|------------|------------|------------|------------|
| 0.4490498  | 0.0057439  | 4.92E-05   | 0.00023835 | 0.00103842 | 1.90E-05   |
| 0.30480468 | 0.05381105 | 0.00243277 | 0.00356671 | 0.00159934 | 0.00033277 |
| 0.19184357 | 0.69998655 | 0.01675571 | 0.00548554 | 0.00150162 | 0.00475401 |
| 0.27282738 | 0.70981206 | 0.00642886 | 0.00123345 | 0.00166565 | 0.00390485 |
| 0.53973676 | 0.57577836 | 0.01362861 | 0.00201923 | 0.00213811 | 0.00226518 |
| 0.98972767 | 0.59822602 | 0.05698094 | 0.00709047 | 0.00713719 | 0.00458461 |
| 0.74699706 | 0.75291738 | 0.01503835 | 0.0013407  | 0.0038532  | 0.00388022 |
| 0.49800532 | 0.96104303 | 0.04028887 | 0.00542311 | 0.00314068 | 0.00561593 |
| 0.67069359 | 0.75196284 | 0.01055805 | 0.00095326 | 0.0027319  | 0.00302448 |
| 0.43330874 | 0.1301419  | 0.00078147 | 0.00031711 | 0.00306215 | 0.00104283 |
| 0.5723432  | 0.49202518 | 0.00489992 | 0.00063406 | 0.00061341 | 0.00053473 |
| 0.63077444 | 0.17739561 | 0.00422701 | 0.00122347 | 0.00289504 | 0.00092835 |
| 0.16234549 | 0.48434236 | 0.00192698 | 0.00066712 | 0.00081601 | 0.00218004 |
| 0.57981669 | 0.79983627 | 0.0135751  | 0.00140353 | 0.00465467 | 0.00617827 |
| 0.94842571 | 0.03788883 | 0.00198566 | 0.00140059 | 0.00230781 | 0.00012411 |
| 0.59837635 | 0.33728081 | 0.01610413 | 0.0036453  | 0.00255085 | 0.00152751 |
| 0.77090148 | 0.98616657 | 0.02848881 | 0.00229947 | 0.00601441 | 0.00746336 |
| 0.19798754 | 0.85621832 | 0.00375613 | 0.00073065 | 0.00029124 | 0.00110038 |
| 0.50084225 | 0.32872607 | 0.00042151 | 5.82E-05   | 0.00051077 | 0.0003481  |
| 0.90883707 | 0.37020763 | 5.13E-05   | 2.70E-06   | 0.00018822 | 8.24E-05   |
| 0.91841559 | 0.3699854  | 5.10E-05   | 2.67E-06   | 0.00018973 | 8.22E-05   |
| 0.11427524 | 0.62137516 | 0.00013426 | 3.44E-05   | 8.33E-06   | 4.03E-05   |
| 0.22127375 | NA         | 0.00136839 | 0.0006256  | 0.00136839 | 0.0006256  |
| 0.15027838 | 0.87052492 | 0.00924543 | 0.00271823 | 0.00072962 | 0.0035249  |
| 0.14793855 | 0.84084346 | 0.00586468 | 0.00164395 | 0.00047004 | 0.00225209 |
| 0.17748851 | 0.3548715  | 0.00322887 | 0.00149194 | 0.00055219 | 0.0010338  |
| 0.45358517 | 0.2642709  | 0.00700713 | 0.00210375 | 0.00303665 | 0.0018755  |
| 0.88416457 | 0.71620883 | 0.00683042 | 0.00045429 | 0.00167336 | 0.00138505 |
| 0.67584483 | 0.75292258 | 0.01098425 | 0.00099298 | 0.00286636 | 0.00315518 |
| 0.42908199 | 0.35144285 | 0.00395651 | 0.00086409 | 0.00213261 | 0.00178386 |
| 0.69465964 | 0.75247044 | 0.02025823 | 0.00208136 | 0.00220273 | 0.00236566 |
| 0.74796664 | 0.29151324 | 0.00092028 | 0.00011087 | 0.00209654 | 0.00089894 |
| 0.55387375 | 0.71150214 | 0.01749123 | 0.00222745 | 0.00222692 | 0.00278399 |
| 0.37040609 | 0.82787792 | 0.00395291 | 0.00045344 | 0.00111579 | 0.0022955  |
| 0.1281883  | 0.03641768 | 0.00071332 | 0.00270907 | 0.00049944 | 0.00015812 |
| 0.20615182 | 0.92448407 | 0.00288253 | 0.00047967 | 0.00049501 | 0.00191731 |
| 0.53550613 | 0.03944188 | 0.00037035 | 0.00033141 | 0.00391193 | 0.00037443 |
| 0.25642921 | 0.31075772 | 0.00332443 | 0.0012498  | 0.0009354  | 0.00111245 |
| 0.83245767 | 0.067753   | 0.00334416 | 0.00171656 | 0.00444165 | 0.00046739 |
| 0.20481047 | 0.17345154 | 0.00274992 | 0.00206553 | 0.00109867 | 0.00094572 |
| 0.3123826  | 0.63984641 | 0.00530576 | 0.00095146 | 0.00034914 | 0.00067012 |

|            |            |            |            |            |            |
|------------|------------|------------|------------|------------|------------|
| 0.30043586 | 0.09539936 | 0.00288589 | 0.00264603 | 0.00220016 | 0.0007843  |
| 0.30021533 | 0.09538418 | 0.00244033 | 0.00217993 | 0.0018566  | 0.00066074 |
| 0.20499597 | 0.91524081 | 0.00319805 | 0.0005504  | 0.00054597 | 0.00210305 |
| 0.69572397 | 0.46071132 | 0.01942681 | 0.00305337 | 0.00283537 | 0.00196292 |
| 0.54398305 | 0.62684021 | 0.02045832 | 0.00308363 | 0.0029434  | 0.00333847 |
| 0.31236199 | 0.64191419 | 0.00529702 | 0.00094688 | 0.00034899 | 0.00067184 |
| 0.09832669 | 0.90234562 | 0.00216398 | 0.00068486 | 0.00029558 | 0.00219312 |
| 0.42795179 | 0.50700365 | 0.01187671 | 0.00234939 | 0.00114094 | 0.00132898 |
| 0.77111452 | 0.34640325 | 0.00127268 | 0.00013435 | 0.00015892 | 7.61E-05   |
| 0.10171796 | 0.91740248 | 0.00334887 | 0.00109356 | 0.00031836 | 0.00232193 |
| 0.22548906 | 0.56850472 | 0.01322482 | 0.00427645 | 0.00115852 | 0.00265265 |
| 0.92059095 | 0.90612825 | 0.02099881 | 0.00143283 | 0.00718188 | 0.00708302 |
| 0.057578   | 0.49444458 | 0.00063912 | 0.00046952 | 0.00040445 | 0.00280821 |
| 0.89571432 | 0.74797043 | 0.0045642  | 0.0002643  | 0.00045098 | 0.0003827  |
| 0.94251059 | 0.75438756 | 0.00652839 | 0.00038683 | 0.00067953 | 0.00055526 |
| 0.6669724  | 0.8942555  | 0.03427678 | 0.00362168 | 0.00486414 | 0.00629566 |
| 0.80606513 | NA         | 0.01207291 | 0.00315347 | 0.00607084 | 0.0009174  |
| NA         | 0.81654137 | 0.00629782 | 0.0009443  | 0.0009443  | 0.00629782 |
| 0.61151242 | 0.66548444 | 0.01992891 | 0.00254925 | 0.00229192 | 0.00247155 |
| 0.23849576 | 0.85552529 | 0.00309357 | 0.00049026 | 0.00149162 | 0.00465251 |
| 0.57527837 | 0.5220283  | 0.00817931 | 0.00111253 | 0.00479247 | 0.00439868 |
| 0.39342434 | 0.65372775 | 0.00016935 | 1.35E-05   | 0.00061295 | 0.00097049 |
| 0.83723022 | 0.07436546 | 0.0043191  | 0.00212338 | 0.00471433 | 0.00053806 |
| 0.73695162 | 0.29096409 | 0.00089763 | 0.00010937 | 0.00203536 | 0.0008827  |
| 0.11211098 | 0.57812729 | 0.00708414 | 0.00368404 | 0.0006709  | 0.00292805 |
| 0.38975459 | 0.46861455 | 0.00151432 | 0.00023347 | 0.00013774 | 0.00016315 |
| 0.3657868  | 0.27867638 | 0.000301   | 6.16E-05   | 0.000337   | 0.00026285 |
| 0.30631337 | 0.7347473  | 0.00171806 | 0.00022365 | 0.00038825 | 0.00085903 |
| 0.73285333 | 0.44459734 | 0.03372146 | 0.00604625 | 0.00575117 | 0.00369986 |
| 0.58840231 | 0.13247907 | 0.00115565 | 0.00037085 | 0.00033467 | 8.52E-05   |
| 0.48734536 | 0.04711858 | 0.00058819 | 0.0005193  | 0.00037567 | 4.38E-05   |
| 0.23202414 | 0.53958359 | 0.00289804 | 0.00070688 | 0.00026105 | 0.00056334 |
| 0.4718851  | 0.09198293 | 0.00429955 | 0.00291328 | 0.00223959 | 0.00051302 |
| 0.29000636 | 0.89927874 | 0.01961283 | 0.00371047 | 0.00182209 | 0.00498168 |
| 0.2064587  | 0.9086423  | 0.0061127  | 0.00119443 | 0.00091932 | 0.00346543 |
| 0.07586899 | 0.86553152 | 0.00231725 | 0.00097407 | 9.55E-05   | 0.0008823  |
| 0.76932016 | 0.46698932 | 0.00886767 | 0.00104471 | 0.00450368 | 0.00289345 |
| 0.11557414 | 0.41081616 | 0.00083238 | 0.00039892 | 0.00020041 | 0.00063707 |
| 0.51678514 | 0.24314297 | 0.00860988 | 0.00258513 | 0.00252865 | 0.00128722 |
| 0.58084468 | 0.02740711 | 0.00023568 | 0.00025758 | 0.00053716 | 3.24E-05   |
| 0.6989847  | 0.77707953 | 0.01305943 | 0.00116028 | 0.00223189 | 0.00245311 |



|            |            |            |            |            |            |
|------------|------------|------------|------------|------------|------------|
| 0.83593855 | 0.30152809 | 0.0090013  | 0.00146369 | 0.00268818 | 0.00107793 |
| 0.76682103 | 0.58768698 | 0.00912023 | 0.00088125 | 0.00262357 | 0.00206911 |
| 0.96983232 | 0.99605728 | 0.06403655 | 0.00539335 | 0.00653179 | 0.00668638 |
| 0.99958547 | 0.90057256 | 0.06209655 | 0.00550605 | 0.00670643 | 0.00611998 |
| 0.83938013 | 0.35791872 | 0.0179878  | 0.00293771 | 0.00671913 | 0.00316681 |
| 0.1614922  | 0.57099799 | 0.00993205 | 0.0040429  | 0.00087482 | 0.00271686 |
| 0.03098939 | 0.99331717 | 0.00603451 | 0.00587878 | 0.00030494 | 0.00683783 |
| 0.8668289  | 0.71224482 | 0.04134519 | 0.00448111 | 0.00438194 | 0.00368292 |
| 0.07593012 | 0.67713842 | 0.00366551 | 0.00207694 | 0.00026262 | 0.00190424 |
| 0.49742092 | 0.03395746 | 0.00053967 | 0.00062233 | 0.00049317 | 4.19E-05   |
| 0.88321422 | 0.7795597  | 0.03297257 | 0.00303248 | 0.00378338 | 0.00338702 |
| 0.15078263 | 0.80074439 | 0.00095893 | 0.00020019 | 9.60E-05   | 0.00044333 |
| 0.05002453 | 0.46000591 | 0.0004228  | 0.00035614 | 0.00010995 | 0.00083376 |
| 0.88385685 | 0.77156046 | 0.03480769 | 0.0032805  | 0.00409885 | 0.00363425 |
| 0.04204891 | 0.74921198 | 0.00373213 | 0.00328164 | 0.00025961 | 0.00348858 |
| 0.51293982 | 0.46994939 | 0.01620619 | 0.00313815 | 0.00338181 | 0.00312894 |
| 0.56455532 | 0.23484097 | 0.00511568 | 0.00131842 | 0.00133423 | 0.00060411 |
| 0.67890373 | 0.75210444 | 0.01175477 | 0.00107653 | 0.00308628 | 0.00338004 |
| 0.57286568 | 0.38516315 | 0.00660628 | 0.00113336 | 0.00105547 | 0.00073733 |
| 0.59503711 | 0.03970398 | 0.00097331 | 0.00089921 | 0.00076333 | 6.40E-05   |
| 0.80619012 | 0.54064474 | 0.02981569 | 0.00399675 | 0.0036626  | 0.00256795 |
| 0.49312716 | 0.26618738 | 0.00827751 | 0.00237094 | 0.00230564 | 0.00132706 |
| 0.50126964 | 0.04435922 | 0.00075218 | 0.00070761 | 0.00056476 | 6.11E-05   |
| 0.93542738 | 0.97141175 | 0.00400036 | 0.00017043 | 0.00156953 | 0.00162358 |
| 0.74463579 | 0.33997999 | 0.00843    | 0.001346   | 0.0059117  | 0.00295593 |
| 0.03773659 | 0.08203948 | 0.00030061 | 0.00149268 | 9.62E-05   | 0.00019646 |
| 0.84177725 | 0.32179839 | 0.0120192  | 0.0019553  | 0.00355407 | 0.00150686 |
| 0.45410867 | 0.50420585 | 0.01094702 | 0.00202631 | 0.00105313 | 0.00115729 |
| 0.10605789 | 0.89388149 | 0.00166541 | 0.00047473 | 0.00027965 | 0.00192517 |
| 0.84820199 | 0.84661038 | 0.01578574 | 0.00114345 | 0.004836   | 0.004828   |
| 0.69162806 | 0.18379911 | 0.00568842 | 0.00155444 | 0.00197588 | 0.00059852 |
| 0.64148179 | 0.98428039 | 0.01745629 | 0.00145673 | 0.00206549 | 0.0030253  |
| 0.43515397 | 0.49488837 | 0.00164473 | 0.00022122 | 0.00026834 | 0.00030181 |
| 0.98867425 | 0.55424646 | 0.03839896 | 0.00452221 | 0.00461121 | 0.00276059 |
| 0.46608499 | 0.23992538 | 0.00114239 | 0.00026319 | 0.00115374 | 0.00063305 |
| 0.20416948 | 0.97050229 | 0.02239696 | 0.00558162 | 0.00163927 | 0.00653782 |
| 0.67344302 | 0.19082003 | 0.0057781  | 0.00156849 | 0.00193792 | 0.00062202 |
| 0.4703207  | 0.65230036 | 0.01161979 | 0.00167779 | 0.00088333 | 0.00118648 |
| 0.88064115 | 0.0573523  | 0.00396551 | 0.00231461 | 0.00216217 | 0.00018184 |
| 0.31608904 | 0.10636141 | 0.00087056 | 0.0005749  | 0.00155711 | 0.00058254 |
| 0.61118867 | 0.14797607 | 0.00102272 | 0.00028103 | 0.00027697 | 7.52E-05   |

|            |            |            |            |            |            |
|------------|------------|------------|------------|------------|------------|
| 0.5801068  | 0.60638655 | 0.01347727 | 0.00178244 | 0.00116264 | 0.00120996 |
| 0.47929682 | 0.33700785 | 0.00802246 | 0.00189665 | 0.00155417 | 0.00113229 |
| 0.57436595 | 0.14511303 | 0.00108743 | 0.00032512 | 0.00034517 | 9.77E-05   |
| 0.32071862 | 0.37760367 | 0.01313082 | 0.00445784 | 0.00225421 | 0.00260758 |
| 0.29121131 | 0.58318418 | 0.00671295 | 0.00146226 | 0.00081125 | 0.00151681 |
| 0.47889206 | 0.09149762 | 0.00438582 | 0.00295712 | 0.00227204 | 0.0005112  |
| 0.19347837 | 0.1796078  | 0.00324184 | 0.00255179 | 0.00075615 | 0.00070689 |
| 0.21192536 | 0.2767742  | 0.0038794  | 0.00197344 | 0.00118931 | 0.00151195 |
| 0.65958371 | 0.08285445 | 0.00440539 | 0.00244181 | 0.00240795 | 0.00037029 |
| 0.08454951 | 0.50320148 | 0.00146509 | 0.0008459  | 0.00015349 | 0.00078092 |
| 0.37681098 | 0.33042721 | 0.01336043 | 0.00444302 | 0.00300268 | 0.00267146 |
| 0.19020211 | 0.40374887 | 0.00106855 | 0.00034331 | 0.00016208 | 0.00032289 |
| 0.95585312 | 0.76991932 | 0.02621996 | 0.00212804 | 0.00474113 | 0.00391618 |
| 0.1620057  | 0.47388224 | 0.00110555 | 0.00035721 | 0.00012666 | 0.00033869 |
| 0.99826019 | 0.26204788 | 0.02251646 | 0.00439856 | 0.00571019 | 0.0017411  |
| 0.88739091 | 0.06592014 | 0.00457823 | 0.00240479 | 0.00501071 | 0.00048705 |
| 0.53456277 | 0.24936944 | 0.00747978 | 0.0020695  | 0.00159806 | 0.00080401 |
| 0.09136152 | 0.88951615 | 0.00326647 | 0.00120272 | 0.00051934 | 0.00400615 |
| 0.11814098 | 0.54193355 | 0.00482907 | 0.00236305 | 0.00047252 | 0.00186902 |
| 0.38001911 | 0.48116558 | 0.01240644 | 0.00288658 | 0.00181549 | 0.00224202 |
| 0.52852318 | 0.70754901 | 0.00835853 | 0.0009373  | 0.00082338 | 0.0010715  |
| 0.16105482 | NA         | 0.00126527 | 0.0007878  | 0.00126527 | 0.0007878  |
| 0.53821863 | 0.4272943  | 0.01375275 | 0.00267134 | 0.00255151 | 0.00207653 |
| 0.86901647 | 0.74254962 | 0.02565894 | 0.00232776 | 0.00463108 | 0.0040302  |
| 0.92005783 | 0.19133196 | 0.0007628  | 0.00010855 | 0.0004297  | 0.00010193 |
| 0.02922324 | 0.97976464 | 0.00530869 | 0.00539108 | 0.00026975 | 0.0063232  |
| 0.90535179 | 0.73572503 | 0.03139341 | 0.00293136 | 0.00616802 | 0.00513933 |
| 0.98866514 | 0.96671028 | 0.07795454 | 0.00710959 | 0.00711033 | 0.00697188 |
| 0.06592167 | 0.27076515 | 0.00257024 | 0.00352522 | 0.00049333 | 0.00176638 |
| 0.29041212 | 0.71748817 | 0.01834664 | 0.00416494 | 0.00186833 | 0.00417816 |
| 0.28779091 | 0.71198407 | 0.0179978  | 0.00412762 | 0.00184855 | 0.00413947 |
| 0.13969428 | 0.3448399  | 0.00318263 | 0.00186552 | 0.00043665 | 0.00099052 |
| 0.33479743 | 0.51744958 | 0.01443811 | 0.00364784 | 0.00178151 | 0.00262844 |
| 0.47233983 | 0.1071354  | 0.00303836 | 0.00169064 | 0.00283542 | 0.00074832 |
| 0.30325796 | 0.9645262  | 0.00698673 | 0.00094057 | 0.0014474  | 0.00406126 |
| 0.52097295 | 0.59816807 | 0.01180249 | 0.0016865  | 0.00253026 | 0.00286154 |
| 0.32167637 | 0.049315   | 0.00342229 | 0.00544248 | 0.002622   | 0.00048428 |
| 0.21193571 | 0.9558939  | 0.00354638 | 0.00058053 | 0.00073099 | 0.00282757 |
| 0.9527695  | 0.13172523 | 0.00684699 | 0.00196379 | 0.00404814 | 0.00068742 |
| 0.33321091 | 0.15133775 | 0.00132442 | 0.00064531 | 0.00042903 | 0.00020863 |
| 0.635441   | 0.26471791 | 0.02239755 | 0.00644545 | 0.00520341 | 0.00239406 |

|            |            |            |            |            |            |
|------------|------------|------------|------------|------------|------------|
| 0.70375576 | 0.272795   | 0.01691748 | 0.00404963 | 0.00336398 | 0.00144316 |
| 0.32596514 | 0.05696838 | 0.00375903 | 0.00528062 | 0.00277434 | 0.00057786 |
| 0.56559457 | 0.42956261 | 0.00189194 | 0.0002336  | 0.00081628 | 0.00063626 |
| 0.71716403 | 0.46484106 | 0.00548024 | 0.0006227  | 0.00272878 | 0.00185285 |
| 0.70704962 | 0.48271549 | 0.00637638 | 0.0007322  | 0.00291736 | 0.00207584 |
| 0.3207961  | 0.68127016 | 0.00882983 | 0.00162508 | 0.0022119  | 0.00431897 |
| 0.23597401 | 0.05578528 | 0.00235191 | 0.00416845 | 0.00150628 | 0.00040861 |
| 0.22224212 | 0.66320094 | 0.01533772 | 0.0045329  | 0.00134017 | 0.00355796 |
| 0.96727178 | 0.80074682 | 0.03781107 | 0.00326264 | 0.00389824 | 0.0032971  |
| 0.12137668 | 0.39985468 | 0.00090182 | 0.00042879 | 0.00022392 | 0.00066362 |
| 0.18496238 | 0.99394711 | 0.01821549 | 0.00461093 | 0.00147663 | 0.00657361 |
| 0.96497895 | 0.20402525 | 0.0003844  | 4.43E-05   | 0.00126368 | 0.00030881 |
| 0.94838375 | 0.00039926 | 6.84E-06   | 0.0001617  | 0.00083402 | 6.13E-07   |
| 0.32846485 | 0.29641187 | 0.00722524 | 0.00262762 | 0.00162198 | 0.0014792  |
| 0.57605774 | 0.34887016 | 0.01705786 | 0.00392892 | 0.00410508 | 0.00263018 |
| 0.14861444 | 0.48399139 | 0.00507368 | 0.00225826 | 0.00099693 | 0.00287223 |
| 0.76779753 | 0.09531772 | 0.00213532 | 0.00080267 | 0.00323057 | 0.00049482 |
| 0.71585379 | 0.09531338 | 0.00208424 | 0.00083134 | 0.00330299 | 0.00053943 |
| 0.26079753 | 0.24323699 | 0.00479729 | 0.00236408 | 0.00126433 | 0.00118744 |
| 0.12325494 | 0.13538176 | 0.00043356 | 0.00049103 | 8.90E-05   | 9.70E-05   |
| 0.70059436 | 0.27390743 | 0.02475775 | 0.0065076  | 0.00566045 | 0.00246376 |
| 0.49937443 | 0.63596406 | 0.00026083 | 1.82E-05   | 4.12E-05   | 5.16E-05   |
| 0.05282492 | 0.54863126 | 0.00520939 | 0.00521717 | 0.00043938 | 0.00360468 |
| 0.08336396 | 0.16756484 | 0.00300181 | 0.00523427 | 0.00062091 | 0.00116708 |
| 0.25723601 | 0.90353254 | 0.00208027 | 0.0002721  | 0.00179414 | 0.00547571 |
| 0.99832413 | 0.86452768 | 0.06065515 | 0.00553652 | 0.0067061  | 0.00591055 |
| 0.48386193 | 0.3386902  | 0.01097065 | 0.00273803 | 0.00204722 | 0.00148717 |
| 0.50679381 | 0.66638211 | 0.01316793 | 0.00179634 | 0.00252913 | 0.00322657 |
| 0.7368355  | 0.01965718 | 0.00206282 | 0.00329546 | 0.00406494 | 0.0001538  |
| 0.98258719 | 0.99290435 | 0.06468219 | 0.00541941 | 0.00660705 | 0.00666783 |
| 0.08327007 | 0.17060207 | 0.00304519 | 0.00524303 | 0.0006219  | 0.0011892  |
| 0.51490067 | 0.14264938 | 0.00848112 | 0.00408911 | 0.00349999 | 0.00111054 |
| 0.88341575 | 0.25864261 | 0.00460228 | 0.00071075 | 0.00323623 | 0.00107794 |
| 0.767448   | 0.32593248 | 0.00094789 | 0.00010112 | 0.00014939 | 6.79E-05   |
| 0.41360376 | 0.02849915 | 0.00043304 | 0.00067226 | 0.00043894 | 3.75E-05   |
| 0.51605324 | 0.21613891 | 0.01108637 | 0.0039023  | 0.00303503 | 0.00139417 |
| 0.16369442 | 0.59587398 | 0.01369517 | 0.0056781  | 0.00116282 | 0.00368956 |
| 0.74514579 | 0.481098   | 0.01978323 | 0.0028278  | 0.00336108 | 0.00227698 |
| 0.2744526  | 0.2188096  | 0.00563024 | 0.00300042 | 0.00144765 | 0.00118077 |
| 0.69098101 | 0.62879655 | 0.00089438 | 5.67E-05   | 0.00028508 | 0.00026153 |
| 0.0217159  | 0.00382677 | 3.87E-05   | 0.00406901 | 0.00021506 | 4.34E-05   |

|            |            |            |            |            |            |
|------------|------------|------------|------------|------------|------------|
| 0.08314502 | 0.95989986 | 0.00510926 | 0.00207506 | 0.00052557 | 0.00471137 |
| 0.28787724 | 0.06788952 | 0.00023912 | 0.000217   | 0.0002179  | 5.76E-05   |
| 0.21837689 | 0.54283    | 0.00096751 | 0.00020571 | 0.0001494  | 0.00034392 |
| 0.64710432 | 0.29903571 | 0.00910882 | 0.00188218 | 0.0037256  | 0.00187331 |
| 0.16634506 | 0.61603996 | 0.00385494 | 0.00118714 | 0.00058344 | 0.00189948 |
| 0.58427305 | 0.10730606 | 0.00124517 | 0.00049303 | 0.00044275 | 9.37E-05   |
| 0.5260973  | 0.91296296 | 0.01075061 | 0.00101867 | 0.00115052 | 0.00188736 |
| 0.1803572  | 0.79731938 | 0.00626742 | 0.00156313 | 0.00121273 | 0.0045659  |
| 0.17398314 | 0.79660993 | 0.00580976 | 0.00147522 | 0.00110528 | 0.00430009 |
| 0.5802737  | 0.97918904 | 0.03564684 | 0.00397723 | 0.00340568 | 0.00540773 |
| 0.00044898 | 0.10112091 | 2.99E-06   | 0.00046373 | 2.18E-06   | 0.00033391 |
| 0.32516634 | 0.07036054 | 0.0002357  | 0.00018479 | 0.00020684 | 5.05E-05   |
| 0.26544294 | 0.90093673 | 0.01143515 | 0.00205604 | 0.00183918 | 0.00544403 |
| 0.30370414 | 0.89958138 | 0.01436071 | 0.0024169  | 0.00256327 | 0.00669478 |
| 0.28496302 | 0.63578458 | 0.00543247 | 0.00106952 | 0.00044573 | 0.00092274 |
| 0.88957389 | 0.4726403  | 0.01021757 | 0.0010788  | 0.00191005 | 0.00108229 |
| 0.89917998 | 0.43992464 | 0.00900463 | 0.00097595 | 0.00180642 | 0.00094977 |
| 0.62176096 | 0.03146154 | 0.00043565 | 0.00042721 | 0.0016891  | 0.0001119  |
| 0.18791707 | 0.57601502 | 0.00166185 | 0.00041972 | 0.00025981 | 0.00072024 |
| 0.85193529 | 0.75883425 | 0.04253255 | 0.00446473 | 0.0058614  | 0.0052941  |
| 0.77500993 | 0.47597408 | 0.02011302 | 0.00281459 | 0.00292441 | 0.00189293 |
| 0.73404505 | 0.40256028 | 0.01976419 | 0.0033535  | 0.00316778 | 0.00185391 |
| 0.26577198 | NA         | 0.00086792 | 0.0003143  | 0.00086792 | 0.0003143  |
| 0.29621128 | 0.54150571 | 0.00813367 | 0.00194062 | 0.00085845 | 0.00147833 |
| 0.74011318 | 0.83857213 | 0.00688095 | 0.00046687 | 0.00399689 | 0.00446348 |
| 0.45271458 | 0.29344601 | 0.01799499 | 0.00604621 | 0.00311275 | 0.00211523 |
| 0.76769685 | 0.57004771 | 0.02984453 | 0.00398744 | 0.00588525 | 0.00452782 |
| 0.41489311 | 0.47459655 | 0.01983422 | 0.00482375 | 0.00307998 | 0.00347043 |
| 0.51227801 | 0.32544989 | 0.01490728 | 0.00392526 | 0.00245424 | 0.00163579 |
| 0.40548696 | 5.56E-05   | 7.98E-06   | 0.00245547 | 0.00120065 | 3.11E-07   |
| 0.34267913 | 0.29621512 | 0.00746886 | 0.00263455 | 0.00274587 | 0.00241154 |
| 0.56093727 | 0.75897931 | 0.01527564 | 0.00175528 | 0.00307232 | 0.00401706 |
| 0.98285477 | 0.81646179 | 0.03286892 | 0.00263541 | 0.00482824 | 0.00409868 |
| 0.87799486 | 0.31867337 | 0.01573718 | 0.00265025 | 0.0050487  | 0.00205304 |
| 0.09627631 | 0.30632598 | 0.00465899 | 0.00450816 | 0.00090721 | 0.00256344 |
| 0.84094031 | 0.88025565 | 0.04422344 | 0.00416875 | 0.00369188 | 0.00384435 |
| 0.16283931 | 0.47388224 | 0.00096518 | 0.00030382 | 0.00010765 | 0.00028687 |
| 0.16611671 | 0.48640812 | 0.00100127 | 0.00030396 | 0.00011049 | 0.00029606 |
| 0.70203409 | 0.19720599 | 0.0129698  | 0.00390117 | 0.00322741 | 0.00103558 |
| 0.51664677 | 0.94595525 | 0.01588543 | 0.00162876 | 0.00346557 | 0.00591138 |
| 0.75513772 | 0.72554527 | 0.04680936 | 0.00585589 | 0.00522014 | 0.0050395  |

|            |            |            |            |            |            |
|------------|------------|------------|------------|------------|------------|
| 0.34300824 | 0.02814412 | 0.00057584 | 0.00111064 | 0.00228265 | 0.00023757 |
| 0.76579926 | 0.0720082  | 0.00707969 | 0.00424721 | 0.00513912 | 0.00061925 |
| 0.65699169 | 0.043102   | 0.0038311  | 0.00371885 | 0.00296599 | 0.00025335 |
| 0.95907797 | 0.71216402 | 0.00370256 | 0.0002017  | 0.00418991 | 0.00321853 |
| 0.38819433 | 0.64621309 | 0.00277735 | 0.00035735 | 0.00015472 | 0.00024686 |
| 0.57185166 | 0.71409056 | 0.01439786 | 0.0016927  | 0.00281725 | 0.00343191 |
| 0.46936747 | 0.56347844 | 0.02641736 | 0.00532642 | 0.00348952 | 0.00410256 |
| 0.94635232 | 0.65639953 | 0.01831409 | 0.00157023 | 0.00195543 | 0.00140861 |
| 0.39123709 | 0.31946426 | 0.00214304 | 0.00049611 | 0.00138741 | 0.00115615 |
| 0.80762532 | 0.33365862 | 0.00115568 | 0.00011903 | 0.00012008 | 5.31E-05   |
| 0.924429   | 0.66109564 | 0.02570607 | 0.00244919 | 0.00323855 | 0.00240305 |
| 0.12137766 | 0.73996446 | 0.00350778 | 0.00119558 | 0.00025696 | 0.00132508 |
| 0.5616834  | 0.21123184 | 0.00010708 | 1.65E-05   | 2.48E-05   | 9.95E-06   |
| 0.8983703  | 0.92392491 | 0.05173297 | 0.00463451 | 0.0047648  | 0.00488414 |
| 0.28614037 | 0.14317955 | 0.00073859 | 0.00039775 | 0.00151821 | 0.00081352 |
| 0.12325494 | 0.13538176 | 0.00043996 | 0.00049923 | 9.05E-05   | 9.86E-05   |
| 0.12325494 | 0.13538176 | 0.00042609 | 0.00048146 | 8.72E-05   | 9.51E-05   |
| 0.09430598 | 0.20912522 | 0.00023109 | 0.00020707 | 0.00010929 | 0.00022711 |
| 0.1625256  | 0.48433936 | 0.00182785 | 0.00062659 | 0.00076731 | 0.00204944 |
| 0.60090119 | 0.71025924 | 0.01556282 | 0.00179254 | 0.00305823 | 0.00354754 |
| 0.95174732 | 0.99472991 | 0.06289922 | 0.00535895 | 0.00644455 | 0.00669905 |
| 0.95114538 | 0.99463608 | 0.06543069 | 0.00565529 | 0.00679675 | 0.0070682  |
| 0.8676802  | 0.2632727  | 0.00919838 | 0.0016416  | 0.00521489 | 0.00180744 |
| 0.1616043  | 0.55884818 | 0.00939692 | 0.00385211 | 0.00082257 | 0.00250681 |
| 0.07947102 | 0.13797098 | 0.00316039 | 0.00686895 | 0.00076176 | 0.00125325 |
| 0.44841159 | 0.44083019 | 0.00930497 | 0.00189512 | 0.00165094 | 0.00162588 |
| 0.63983884 | 0.62997857 | 0.01583516 | 0.00192791 | 0.00327163 | 0.00322683 |
| 0.94836496 | 0.5562506  | 0.0171513  | 0.00167418 | 0.00537834 | 0.00335622 |
| 0.66829922 | 0.37608324 | 0.01212386 | 0.00211313 | 0.00165786 | 0.00098842 |
| 0.92265332 | 0.37011613 | 5.19E-05   | 2.71E-06   | 0.00019471 | 8.40E-05   |
| 0.34876373 | 0.91185296 | 0.01549949 | 0.00232002 | 0.00219949 | 0.00515988 |
| 0.8730251  | 0.65005847 | 0.01491574 | 0.00131635 | 0.00402224 | 0.00309677 |
| 0.36239861 | 0.34126034 | 0.00447706 | 0.00119718 | 0.00154387 | 0.00146277 |
| 0.41506125 | 0.5512894  | 0.00564294 | 0.00090686 | 0.00065835 | 0.00085123 |
| 0.33627509 | 0.08377417 | 0.00534978 | 0.00551819 | 0.00261964 | 0.00075164 |
| 0.56569057 | 0.42935116 | 0.00189119 | 0.00023356 | 0.00082122 | 0.00063974 |
| 0.77350493 | 0.45342582 | 0.0255232  | 0.00397494 | 0.00498112 | 0.00310482 |
| 0.16775235 | 0.77045635 | 0.01389671 | 0.00451063 | 0.00108535 | 0.00423557 |
| 0.97374504 | 0.83353408 | 0.02002342 | 0.00138245 | 0.00549268 | 0.0047896  |
| 0.61403596 | 0.91100384 | 0.00304494 | 0.00019152 | 0.00134195 | 0.00191168 |
| 0.69648657 | 0.73894939 | 0.01801542 | 0.00182057 | 0.00406662 | 0.00428508 |

|            |            |            |            |            |            |
|------------|------------|------------|------------|------------|------------|
| 0.43258789 | 0.77225303 | 0.00108538 | 9.07E-05   | 4.52E-05   | 7.72E-05   |
| 0.86690202 | 0.67152866 | 0.01152761 | 0.00093357 | 0.00329301 | 0.00262404 |
| 0.83043535 | 0.19131652 | 0.0016102  | 0.00028502 | 0.00041088 | 0.00010705 |
| 0.6109901  | 0.43015013 | 0.00224685 | 0.00026636 | 0.00042971 | 0.00031203 |
| 0.8081162  | 0.62865804 | 0.03545779 | 0.00436093 | 0.00596132 | 0.00477898 |
| 0.68024774 | 0.90276567 | 0.01243151 | 0.00097699 | 0.00101473 | 0.00130936 |
| 0.44878721 | 0.52233671 | 0.00535994 | 0.00083397 | 0.00317055 | 0.00362755 |
| 0.4513107  | 0.52188791 | 0.00402951 | 0.00058971 | 0.00242264 | 0.00275748 |
| 0.27044928 | 0.11367791 | 0.00229073 | 0.00190114 | 0.00075745 | 0.00034456 |
| 0.56576194 | 0.07746593 | 7.94E-05   | 2.98E-05   | 0.00013315 | 2.11E-05   |
| 0.98530895 | 0.88721663 | 0.0482308  | 0.00403437 | 0.00545914 | 0.00497753 |
| 0.73223577 | 0.27741955 | 0.00469224 | 0.00080914 | 0.00115577 | 0.00048007 |
| 0.15258519 | 0.62528743 | 0.00244224 | 0.00073903 | 0.00044561 | 0.00159457 |
| 0.88061137 | 0.47900625 | 0.03385205 | 0.00484109 | 0.00588794 | 0.00343927 |
| 0.81264394 | 0.7701232  | 0.0307152  | 0.00301246 | 0.00359806 | 0.00343061 |
| 0.08075161 | 0.48763433 | 0.00434367 | 0.00321497 | 0.00068978 | 0.00346166 |
| 0.82863919 | 0.55901609 | 0.04567632 | 0.00657151 | 0.00649031 | 0.00459038 |
| 0.3802628  | 0.2917282  | 0.00360704 | 0.00102155 | 0.00088052 | 0.00069277 |
| 0.77387975 | 0.44947101 | 0.00748082 | 0.00087397 | 0.00200435 | 0.001231   |
| 0.63214592 | 0.2844684  | 0.00378269 | 0.00069846 | 0.00079969 | 0.00038728 |
| 0.72312169 | 0.06116795 | 0.00665922 | 0.00479867 | 0.00445861 | 0.00048597 |
| 0.94109188 | NA         | 0.00386735 | 0.00076476 | 0.00577815 | 0.0007428  |
| 0.96635773 | 0.84946257 | 0.00724678 | 0.00038562 | 0.00578742 | 0.00516672 |
| 0.95870159 | 0.98281392 | 0.01635065 | 0.00093546 | 0.00209398 | 0.00214098 |
| 0.95668458 | 0.95805839 | 0.01333677 | 0.00074259 | 0.001663   | 0.00166514 |
| 0.16386782 | 0.83642818 | 0.0156844  | 0.00496743 | 0.00122922 | 0.00525199 |
| 0.02340956 | 0.63880323 | 0.00125634 | 0.00181648 | 7.13E-05   | 0.00145602 |
| 0.2354984  | 0.81146037 | 0.00423964 | 0.0007574  | 0.0008162  | 0.00247972 |
| 0.52494663 | 0.04956459 | 0.00271312 | 0.00268474 | 0.00182142 | 0.0002144  |
| 0.66523315 | 0.42737378 | 0.00480033 | 0.00061327 | 0.0011111  | 0.00074504 |
| 0.10989458 | 0.1688463  | 0.00292013 | 0.00394629 | 0.00083658 | 0.00123243 |
| 0.8801796  | 0.28706456 | 0.00882103 | 0.00142493 | 0.00304921 | 0.00111844 |
| 0.84646831 | 0.67683694 | 0.05332701 | 0.00668457 | 0.00674964 | 0.00554624 |
| 0.54434561 | 0.98737267 | 0.0310116  | 0.00349122 | 0.00437221 | 0.00738038 |
| 0.15163    | 0.87046424 | 0.00939737 | 0.00275056 | 0.00074469 | 0.00356756 |
| 0.54126889 | 0.59382077 | 0.01437219 | 0.00209255 | 0.00268185 | 0.00291238 |
| 0.51711406 | 0.6751926  | 0.01328823 | 0.00176329 | 0.00257455 | 0.00326389 |
| 0.94669861 | 0.28561295 | 0.01532763 | 0.00264429 | 0.00471524 | 0.00162319 |
| 0.95772243 | 0.29807024 | 0.02022224 | 0.00355837 | 0.00620712 | 0.00220735 |
| 0.95946216 | 0.2992992  | 0.02040592 | 0.00358001 | 0.00622873 | 0.00221972 |
| 0.86520831 | 0.21804651 | 0.00227859 | 0.00036656 | 0.00643288 | 0.00189557 |

|            |            |            |            |            |            |
|------------|------------|------------|------------|------------|------------|
| 0.8236366  | 0.99951547 | 0.05563224 | 0.00514187 | 0.00575883 | 0.00682501 |
| 0.47831349 | 0.09270694 | 0.00415796 | 0.00274816 | 0.00211927 | 0.00048248 |
| 0.47807528 | 0.09140327 | 0.00437537 | 0.00295602 | 0.0022662  | 0.00051017 |
| 0.51227801 | 0.33739436 | 0.02223593 | 0.00623727 | 0.00391415 | 0.00270156 |
| 0.40913294 | 0.7550565  | 0.00129846 | 0.00012032 | 8.17E-05   | 0.00014357 |
| 0.68696095 | 0.00901555 | 0.00111803 | 0.0034913  | 0.0055755  | 0.00011134 |
| 0.78120722 | 0.80617257 | 0.03739494 | 0.00386344 | 0.00616427 | 0.00633683 |
| 0.60380772 | 0.8234065  | 0.03464676 | 0.00431415 | 0.0038546  | 0.00506959 |
| 0.33288653 | 0.66680736 | 0.00216469 | 0.00029743 | 0.0015219  | 0.00283169 |
| 0.41609354 | 0.2800343  | 0.0128453  | 0.00449041 | 0.00349892 | 0.00246036 |
| 0.62179329 | 0.61432213 | 0.00316554 | 0.00028449 | 0.00031559 | 0.00031212 |
| 0.24079273 | 0.78127336 | 0.00103664 | 0.00014589 | 3.96E-05   | 0.00011746 |
| 0.94239477 | 0.28184728 | 0.01653387 | 0.00295133 | 0.00540115 | 0.00184907 |
| 0.93824425 | 0.28018731 | 0.0174161  | 0.00317733 | 0.00579959 | 0.00198528 |
| 0.94318965 | 0.28442863 | 0.01847309 | 0.00335821 | 0.00608019 | 0.00210134 |
| 0.94912289 | 0.29039164 | 0.02090534 | 0.00382674 | 0.00672286 | 0.0023579  |
| 0.96561686 | 0.32722503 | 0.01899616 | 0.00300691 | 0.0053857  | 0.00206173 |
| 0.57983218 | 0.71402656 | 0.01451984 | 0.00168957 | 0.00285267 | 0.0034322  |
| 0.85228749 | 0.18040083 | 0.00484706 | 0.00108174 | 0.00533141 | 0.00133815 |
| 0.74169983 | 0.1676348  | 0.01194903 | 0.0038825  | 0.00543548 | 0.00144768 |
| 0.78455692 | 0.3447851  | 0.00409517 | 0.00053021 | 0.00095749 | 0.00045443 |
| 0.88688956 | 0.12091285 | 0.00607526 | 0.00195863 | 0.00367412 | 0.0006146  |
| 0.0837715  | 0.1701716  | 0.00302691 | 0.00519093 | 0.00063354 | 0.00120202 |
| 0.08365672 | 0.16074471 | 0.00290402 | 0.0052105  | 0.00061734 | 0.00111424 |
| 0.06893375 | 0.61326939 | 0.0019812  | 0.001207   | 0.00017678 | 0.00128951 |
| 0.08664715 | 0.63498863 | 0.00362161 | 0.00192734 | 0.00035842 | 0.00216632 |
| 0.2002172  | 0.48887384 | 0.00267393 | 0.00080333 | 0.00131472 | 0.00292158 |
| 0.16234549 | 0.48433637 | 0.00216086 | 0.00076274 | 0.00093299 | 0.00248836 |
| 0.24432427 | 0.69636995 | 0.00131325 | 0.00021087 | 0.00186242 | 0.00472555 |
| 0.13652683 | 0.62058987 | 0.0017974  | 0.00057475 | 0.00012432 | 0.00049675 |
| 0.50172408 | 0.66435587 | 0.01433279 | 0.00201871 | 0.00279635 | 0.00358835 |
| 0.13371    | 0.61350398 | 0.0044632  | 0.0017247  | 0.00037449 | 0.00148694 |
| 0.08631612 | 0.6240118  | 0.00131232 | 0.00060145 | 0.00010356 | 0.00063221 |
| 0.19021941 | 0.47333954 | 0.00261399 | 0.00084355 | 0.00125552 | 0.00283885 |
| 0.24442604 | 0.69638703 | 0.00130667 | 0.00020955 | 0.00186311 | 0.00472565 |
| 0.86435459 | 0.24519083 | 0.00885725 | 0.00167681 | 0.00491197 | 0.00160113 |
| 0.20045777 | 0.77162803 | 0.01354533 | 0.00372927 | 0.0016835  | 0.00557557 |
| 0.53242211 | 0.55334474 | 0.02291977 | 0.00404909 | 0.0030746  | 0.0031817  |
| 0.32523413 | 0.01903312 | 0.00064588 | 0.00188378 | 0.00266742 | 0.00020458 |
| 0.32521835 | 0.20214669 | 0.00183965 | 0.00074325 | 0.00190102 | 0.00124065 |
| 0.20997539 | 0.24170581 | 0.0064709  | 0.00410789 | 0.001361   | 0.00154437 |

|            |            |            |            |            |            |
|------------|------------|------------|------------|------------|------------|
| 0.12592022 | 0.90631078 | 0.00826344 | 0.0026804  | 0.00062194 | 0.00365517 |
| 0.15029914 | 0.87052348 | 0.00924784 | 0.00271876 | 0.00072985 | 0.00352557 |
| 0.14545684 | 0.80625555 | 0.0055923  | 0.0016373  | 0.00044757 | 0.00209882 |
| 0.17322476 | 0.3530571  | 0.00287138 | 0.00133487 | 0.00047354 | 0.00090299 |
| 0.95187543 | 0.99169227 | 0.06263279 | 0.00534215 | 0.00642491 | 0.00665999 |
| 0.56321916 | 0.74159284 | 0.01960753 | 0.00244042 | 0.00406638 | 0.00518419 |
| 0.63422665 | 0.6615668  | 0.00046954 | 2.77E-05   | 2.30E-05   | 2.40E-05   |
| 0.77383887 | 0.3186262  | 0.00104416 | 0.00011472 | 0.00013593 | 6.00E-05   |
| 0.61414623 | 0.22306813 | 0.00127728 | 0.00024893 | 0.00288448 | 0.00116492 |
| 0.43273657 | 0.77047219 | 0.00147172 | 0.00012996 | 6.49E-05   | 0.00011051 |
| 0.71413451 | 0.29626599 | 0.00513924 | 0.00086986 | 0.00211087 | 0.00095767 |
| 0.54633666 | 0.92935838 | 0.01364913 | 0.00130252 | 0.00158917 | 0.00255552 |
| 0.7347376  | 0.98626335 | 0.03493525 | 0.00312305 | 0.00280961 | 0.00364916 |
| 0.81153104 | 0.35843627 | 0.00675509 | 0.00090741 | 0.00260757 | 0.0012544  |
| 0.68608658 | 0.68770736 | 0.00881263 | 0.00081055 | 0.00408861 | 0.00409716 |
| 0.88667605 | 0.71801453 | 0.0032769  | 0.00018575 | 0.00361326 | 0.00299612 |
| 0.63907822 | 0.98352238 | 0.02260474 | 0.0020278  | 0.00225453 | 0.00330929 |
| 0.55954379 | 0.92583989 | 0.00784003 | 0.00064532 | 0.0008105  | 0.00127655 |
| 0.73895471 | 0.27110314 | 0.0221265  | 0.00544476 | 0.00503712 | 0.00206802 |
| 0.43247944 | 0.10404413 | 0.00049864 | 0.00023285 | 0.00251948 | 0.00069996 |
| 0.28267925 | 0.63689109 | 0.00537198 | 0.00106126 | 0.00043359 | 0.00090577 |
| 0.64639275 | 0.04304263 | 0.00094185 | 0.00074696 | 0.00074962 | 6.27E-05   |
| 0.23845022 | 0.54107688 | 0.00807056 | 0.00233525 | 0.00174239 | 0.00361681 |
| 0.43019844 | 0.12969632 | 0.00078877 | 0.00032365 | 0.00311571 | 0.00106496 |
| 0.76734236 | 0.58542837 | 0.01199186 | 0.00123842 | 0.00369966 | 0.00290966 |
| 0.84447637 | 0.45440532 | 0.01019975 | 0.00116886 | 0.00214012 | 0.00122761 |
| 0.71426704 | 0.68776008 | 0.00932697 | 0.00083792 | 0.00421717 | 0.00407847 |
| 0.31754107 | 0.06949247 | 0.00127357 | 0.00130121 | 0.00065483 | 0.00016365 |
| 0.31744216 | 0.06915535 | 0.00133808 | 0.00138351 | 0.00069638 | 0.00017345 |
| 0.56985216 | 0.42921238 | 0.00308811 | 0.00041484 | 0.00144146 | 0.00111702 |
| 0.88666461 | 0.80014617 | 0.03216274 | 0.00285936 | 0.00489427 | 0.00447033 |
| 0.58215217 | 0.72820497 | 0.01671024 | 0.00197091 | 0.00170846 | 0.00208745 |
| 0.46696304 | 0.20656351 | 0.00282815 | 0.00086959 | 0.00070832 | 0.00033741 |
| 0.04239569 | 0.05363474 | 0.00027352 | 0.00177308 | 0.00017283 | 0.00021442 |
| 0.27280896 | 0.70729239 | 0.00609565 | 0.0011606  | 0.00154058 | 0.00360401 |
| 0.24890103 | 0.34196272 | 0.00844425 | 0.00357007 | 0.00145988 | 0.00194079 |
| 0.57114962 | 0.82144855 | 0.00012069 | 5.23E-06   | 7.43E-06   | 1.04E-05   |
| 0.8207566  | 0.18967062 | 0.00114523 | 0.00019497 | 0.00027841 | 7.24E-05   |
| 0.1789322  | 0.91553722 | 0.01949568 | 0.00555234 | 0.00145369 | 0.00620128 |



**Supplementary Table 2.** Enrichment scores across p-value thresholds and epigenetic features (some of those defined by the Roadmap Epigenomics Consortium (Roadmap Epigenomics Consortium et al., 2015) refers to DNase Hypersensitivity Sites. "Chromatin Marks" is based on chromatin marks assessed in relevant genomic regions; we limit our analyses to regions associated with transcriptional activity (see the "Chromatin Marks" column in corresponding worksheet). "Histone Marks" indicates that markers map to specific Roadmap Type column. Notation in the Roadmap Type column is taken directly from the Roadmap Consortium conventions. Binomial p-values are provided alongside q-values to account for multiple tests with correction. Derivation was based on all tests, but only those with 3 or more markers in the Marker Count column.

| GWAS p-value | Roadmap EID | Marker Count | Enrichment S | Proportion | p-value | q-value |
|--------------|-------------|--------------|--------------|------------|---------|---------|
| 1.00E-05     | E082        | 7            | 3.2476       | 0.0737     | 0.0015  | 0.2939  |
| 1.00E-05     | E081        | 7            | 3.0431       | 0.0737     | 0.0022  | 0.2939  |
| 1.00E-05     | E007        | 5            | 2.6031       | 0.0526     | 0.0129  | 0.5149  |
| 1.00E-05     | E088        | 7            | 2.2289       | 0.0737     | 0.0136  | 0.5149  |
| 1.00E-05     | E118        | 4            | 2.1409       | 0.0421     | 0.0399  | 0.7688  |
| 1.00E-05     | E003        | 3            | 1.5673       | 0.0316     | 0.1258  | 0.7688  |
| 1.00E-05     | E093        | 3            | 1.4691       | 0.0316     | 0.1486  | 0.7688  |
| 1.00E-05     | E092        | 3            | 1.4570       | 0.0316     | 0.1517  | 0.7688  |
| 1.00E-04     | E086        | 33           | 1.3221       | 0.0316     | 0.0468  | 0.7688  |
| 1.00E-05     | E086        | 3            | 1.3196       | 0.0316     | 0.1935  | 0.7688  |
| 1.00E-04     | E082        | 31           | 1.3100       | 0.0297     | 0.0567  | 0.7688  |
| 1.00E-04     | E081        | 33           | 1.3067       | 0.0316     | 0.0533  | 0.7688  |
| 1.00E-05     | E083        | 4            | 1.3005       | 0.0421     | 0.1950  | 0.7688  |
| 1.00E-04     | E088        | 44           | 1.2761       | 0.0422     | 0.0457  | 0.7688  |
| 1.00E-04     | E100        | 31           | 1.2618       | 0.0297     | 0.0826  | 0.7688  |
| 1.00E-05     | E004        | 3            | 1.2489       | 0.0316     | 0.2201  | 0.7688  |
| 1.00E-04     | E029        | 18           | 1.2394       | 0.0173     | 0.1469  | 0.7688  |
| 1.00E-04     | E021        | 34           | 1.2133       | 0.0326     | 0.1099  | 0.7688  |
| 1.00E-04     | E120        | 31           | 1.1935       | 0.0297     | 0.1371  | 0.7688  |
| 1.00E-05     | E055        | 3            | 1.1887       | 0.0316     | 0.2461  | 0.7688  |
| 0.001        | E124        | 206          | 1.1773       | 0.0221     | 0.0093  | 0.4954  |
| 1.00E-04     | E089        | 34           | 1.1674       | 0.0326     | 0.1561  | 0.7688  |
| 1.00E-04     | E007        | 24           | 1.1381       | 0.0230     | 0.2217  | 0.7688  |
| 1.00E-04     | E017        | 23           | 1.1376       | 0.0221     | 0.2255  | 0.7688  |
| 1.00E-04     | E125        | 28           | 1.1308       | 0.0268     | 0.2193  | 0.7688  |
| 1.00E-04     | E128        | 27           | 1.1212       | 0.0259     | 0.2352  | 0.7688  |
| 1.00E-04     | E005        | 18           | 1.1110       | 0.0173     | 0.2734  | 0.7688  |
| 1.00E-04     | E097        | 24           | 1.0935       | 0.0230     | 0.2829  | 0.7688  |
| 0.001        | E082        | 231          | 1.0928       | 0.0248     | 0.0824  | 0.7688  |
| 0.001        | E046        | 168          | 1.0881       | 0.0180     | 0.1270  | 0.7688  |
| 1.00E-04     | E055        | 30           | 1.0827       | 0.0288     | 0.2881  | 0.7688  |
| 1.00E-04     | E121        | 34           | 1.0744       | 0.0326     | 0.2959  | 0.7688  |
| 0.001        | E051        | 162          | 1.0652       | 0.0174     | 0.1962  | 0.7688  |
| 0.01         | E033        | 1540         | 1.0617       | 0.0162     | 0.0091  | 0.4954  |

|          |      |      |        |        |        |        |
|----------|------|------|--------|--------|--------|--------|
| 1.00E-04 | E056 | 28   | 1.0583 | 0.0268 | 0.3343 | 0.8047 |
| 0.01     | E032 | 2050 | 1.0545 | 0.0216 | 0.0077 | 0.4954 |
| 0.001    | E032 | 201  | 1.0542 | 0.0216 | 0.2128 | 0.7688 |
| 0.01     | E097 | 2092 | 1.0465 | 0.0220 | 0.0178 | 0.5897 |
| 1.00E-04 | E090 | 34   | 1.0424 | 0.0326 | 0.3596 | 0.8286 |
| 0.01     | E007 | 1997 | 1.0398 | 0.0210 | 0.0388 | 0.7688 |
| 1.00E-04 | E091 | 31   | 1.0370 | 0.0297 | 0.3727 | 0.8442 |
| 1.00E-04 | E083 | 35   | 1.0365 | 0.0336 | 0.3716 | 0.8442 |
| 0.01     | E051 | 1606 | 1.0357 | 0.0169 | 0.0767 | 0.7688 |
| 0.001    | E081 | 233  | 1.0328 | 0.0250 | 0.2945 | 0.7688 |
| 0.01     | E034 | 1887 | 1.0321 | 0.0199 | 0.0815 | 0.7688 |
| 1.00E-04 | E032 | 22   | 1.0307 | 0.0211 | 0.3877 | 0.8562 |
| 0.01     | E046 | 1619 | 1.0285 | 0.0170 | 0.1250 | 0.7688 |
| 0.01     | E086 | 2336 | 1.0276 | 0.0246 | 0.0899 | 0.7688 |
| 0.01     | E114 | 1693 | 1.0224 | 0.0178 | 0.1751 | 0.7688 |
| 1.00E-04 | E008 | 23   | 1.0218 | 0.0221 | 0.4039 | 0.8675 |
| 1.00E-04 | E124 | 20   | 1.0210 | 0.0192 | 0.4040 | 0.8675 |
| 0.01     | E089 | 2708 | 1.0209 | 0.0285 | 0.1358 | 0.7688 |
| 0.01     | E082 | 2197 | 1.0194 | 0.0231 | 0.1784 | 0.7688 |
| 1.00E-04 | E006 | 27   | 1.0182 | 0.0259 | 0.4116 | 0.8675 |
| 0.01     | E119 | 2151 | 1.0178 | 0.0226 | 0.2003 | 0.7688 |
| 0.01     | E081 | 2338 | 1.0165 | 0.0246 | 0.2085 | 0.7688 |
| 0.01     | E100 | 2274 | 1.0163 | 0.0239 | 0.2142 | 0.7688 |
| 0.001    | E100 | 223  | 1.0161 | 0.0239 | 0.3875 | 0.8562 |
| 0.01     | E092 | 2091 | 1.0156 | 0.0220 | 0.2328 | 0.7688 |
| 0.01     | E093 | 2070 | 1.0138 | 0.0218 | 0.2604 | 0.7688 |
| 0.001    | E033 | 144  | 1.0121 | 0.0155 | 0.4203 | 0.8680 |
| 0.001    | E050 | 189  | 1.0119 | 0.0203 | 0.4158 | 0.8675 |
| 0.01     | E117 | 2213 | 1.0115 | 0.0233 | 0.2885 | 0.7688 |
| 0.001    | E091 | 270  | 1.0111 | 0.0290 | 0.4111 | 0.8675 |
| 1.00E-05 | E090 | 3    | 1.0098 | 0.0316 | 0.3461 | 0.8117 |
| 0.001    | E029 | 131  | 1.0098 | 0.0141 | 0.4323 | 0.8745 |
| 0.01     | E028 | 2238 | 1.0081 | 0.0236 | 0.3445 | 0.8117 |
| 0.01     | E088 | 3165 | 1.0079 | 0.0333 | 0.3231 | 0.8003 |
| 0.01     | E003 | 1929 | 1.0078 | 0.0203 | 0.3591 | 0.8286 |
| 0.01     | E017 | 1853 | 1.0063 | 0.0195 | 0.3867 | 0.8562 |
| 0.001    | E085 | 122  | 1.0050 | 0.0131 | 0.4539 | 0.8910 |
| 0.01     | E008 | 2059 | 1.0043 | 0.0217 | 0.4157 | 0.8675 |
| 0.01     | E123 | 2623 | 1.0043 | 0.0276 | 0.4069 | 0.8675 |
| 0.01     | E094 | 1033 | 1.0032 | 0.0109 | 0.4510 | 0.8910 |
| 0.01     | E090 | 2980 | 1.0032 | 0.0314 | 0.4259 | 0.8681 |
| 0.01     | E083 | 3082 | 1.0021 | 0.0324 | 0.4479 | 0.8910 |
| 0.01     | E050 | 1906 | 1.0009 | 0.0201 | 0.4780 | 0.9068 |

|          |      |      |        |        |        |        |
|----------|------|------|--------|--------|--------|--------|
| 0.01     | E109 | 1936 | 1.0008 | 0.0204 | 0.4791 | 0.9068 |
| 0.01     | E022 | 2481 | 0.9999 | 0.0261 | 0.4973 | 0.9216 |
| 0.01     | E006 | 2413 | 0.9992 | 0.0254 | 0.5112 | 0.9275 |
| 1.00E-04 | E051 | 17   | 0.9985 | 0.0163 | 0.4384 | 0.8801 |
| 0.01     | E098 | 1666 | 0.9973 | 0.0175 | 0.5376 | 0.9286 |
| 0.01     | E126 | 2484 | 0.9971 | 0.0261 | 0.5540 | 0.9337 |
| 0.01     | E056 | 2402 | 0.9968 | 0.0253 | 0.5574 | 0.9337 |
| 0.01     | E122 | 1653 | 0.9957 | 0.0174 | 0.5645 | 0.9337 |
| 0.01     | E124 | 1776 | 0.9955 | 0.0187 | 0.5697 | 0.9337 |
| 0.01     | E118 | 1859 | 0.9951 | 0.0196 | 0.5789 | 0.9337 |
| 0.01     | E055 | 2508 | 0.9938 | 0.0264 | 0.6184 | 0.9635 |
| 0.001    | E088 | 306  | 0.9935 | 0.0328 | 0.5313 | 0.9286 |
| 0.01     | E005 | 1465 | 0.9928 | 0.0154 | 0.6033 | 0.9609 |
| 0.001    | E034 | 178  | 0.9926 | 0.0191 | 0.5199 | 0.9286 |
| 0.01     | E120 | 2347 | 0.9921 | 0.0247 | 0.6463 | 0.9635 |
| 0.001    | E017 | 179  | 0.9911 | 0.0192 | 0.5285 | 0.9286 |
| 0.001    | E116 | 211  | 0.9902 | 0.0226 | 0.5396 | 0.9286 |
| 0.01     | E021 | 2525 | 0.9894 | 0.0266 | 0.7030 | 0.9996 |
| 0.001    | E122 | 161  | 0.9887 | 0.0173 | 0.5371 | 0.9286 |
| 0.01     | E059 | 2668 | 0.9872 | 0.0281 | 0.7469 | 0.9996 |
| 0.001    | E086 | 220  | 0.9867 | 0.0236 | 0.5621 | 0.9337 |
| 0.01     | E091 | 2676 | 0.9829 | 0.0282 | 0.8144 | 0.9996 |
| 0.01     | E116 | 2134 | 0.9822 | 0.0225 | 0.7956 | 0.9996 |
| 1.00E-04 | E098 | 18   | 0.9814 | 0.0173 | 0.4700 | 0.9053 |
| 0.001    | E021 | 245  | 0.9787 | 0.0263 | 0.6178 | 0.9635 |
| 0.01     | E121 | 2820 | 0.9785 | 0.0297 | 0.8780 | 0.9996 |
| 0.01     | E057 | 2793 | 0.9783 | 0.0294 | 0.8789 | 0.9996 |
| 1.00E-04 | E059 | 29   | 0.9773 | 0.0278 | 0.5013 | 0.9225 |
| 0.01     | E080 | 1914 | 0.9764 | 0.0201 | 0.8521 | 0.9996 |
| 1.00E-04 | E080 | 21   | 0.9757 | 0.0201 | 0.4881 | 0.9109 |
| 1.00E-04 | E118 | 20   | 0.9750 | 0.0192 | 0.4868 | 0.9109 |
| 0.001    | E097 | 191  | 0.9742 | 0.0205 | 0.6252 | 0.9635 |
| 0.01     | E004 | 2338 | 0.9734 | 0.0246 | 0.9057 | 0.9996 |
| 0.01     | E125 | 2191 | 0.9716 | 0.0231 | 0.9127 | 0.9996 |
| 0.01     | E084 | 1670 | 0.9710 | 0.0176 | 0.8854 | 0.9996 |
| 0.01     | E029 | 1284 | 0.9708 | 0.0135 | 0.8548 | 0.9996 |
| 0.001    | E118 | 177  | 0.9660 | 0.0190 | 0.6621 | 0.9801 |
| 0.01     | E127 | 1961 | 0.9651 | 0.0206 | 0.9433 | 0.9996 |
| 0.01     | E085 | 1190 | 0.9615 | 0.0125 | 0.9121 | 0.9996 |
| 0.001    | E128 | 206  | 0.9577 | 0.0221 | 0.7213 | 0.9996 |
| 0.001    | E080 | 184  | 0.9570 | 0.0197 | 0.7117 | 0.9996 |
| 0.01     | E128 | 2092 | 0.9539 | 0.0220 | 0.9857 | 0.9996 |
| 1.00E-04 | E003 | 20   | 0.9517 | 0.0192 | 0.5313 | 0.9286 |

|               |     |        |        |        |        |
|---------------|-----|--------|--------|--------|--------|
| 0.001 E022    | 230 | 0.9450 | 0.0247 | 0.7976 | 0.9996 |
| 1.00E-04 E028 | 23  | 0.9436 | 0.0221 | 0.5586 | 0.9337 |
| 0.001 E114    | 152 | 0.9359 | 0.0163 | 0.7821 | 0.9996 |
| 0.001 E120    | 217 | 0.9352 | 0.0233 | 0.8328 | 0.9996 |
| 1.00E-04 E122 | 17  | 0.9326 | 0.0163 | 0.5536 | 0.9337 |
| 0.001 E117    | 200 | 0.9320 | 0.0215 | 0.8346 | 0.9996 |
| 1.00E-04 E092 | 21  | 0.9290 | 0.0201 | 0.5803 | 0.9337 |
| 0.001 E125    | 205 | 0.9268 | 0.0220 | 0.8574 | 0.9996 |
| 0.001 E005    | 132 | 0.9120 | 0.0142 | 0.8475 | 0.9996 |
| 0.001 E006    | 216 | 0.9119 | 0.0232 | 0.9114 | 0.9996 |
| 0.001 E055    | 225 | 0.9090 | 0.0241 | 0.9236 | 0.9996 |
| 1.00E-04 E050 | 19  | 0.9087 | 0.0182 | 0.6098 | 0.9619 |
| 0.001 E127    | 181 | 0.9082 | 0.0194 | 0.9000 | 0.9996 |
| 0.001 E090    | 264 | 0.9061 | 0.0283 | 0.9468 | 0.9996 |
| 0.001 E083    | 273 | 0.9050 | 0.0293 | 0.9520 | 0.9996 |
| 0.001 E126    | 221 | 0.9044 | 0.0237 | 0.9325 | 0.9996 |
| 0.001 E093    | 181 | 0.9038 | 0.0194 | 0.9116 | 0.9996 |
| 0.001 E098    | 147 | 0.8972 | 0.0158 | 0.9027 | 0.9996 |
| 1.00E-04 E127 | 20  | 0.8965 | 0.0192 | 0.6397 | 0.9635 |
| 0.001 E008    | 179 | 0.8902 | 0.0192 | 0.9400 | 0.9996 |
| 0.001 E028    | 193 | 0.8864 | 0.0207 | 0.9538 | 0.9996 |
| 0.001 E007    | 166 | 0.8812 | 0.0178 | 0.9485 | 0.9996 |
| 0.001 E094    | 89  | 0.8812 | 0.0096 | 0.8762 | 0.9996 |
| 1.00E-04 E114 | 16  | 0.8800 | 0.0153 | 0.6424 | 0.9635 |
| 0.001 E059    | 232 | 0.8752 | 0.0249 | 0.9804 | 0.9996 |
| 0.001 E089    | 227 | 0.8725 | 0.0244 | 0.9816 | 0.9996 |
| 1.00E-04 E004 | 23  | 0.8721 | 0.0221 | 0.7072 | 0.9996 |
| 0.001 E121    | 245 | 0.8667 | 0.0263 | 0.9889 | 0.9996 |
| 0.001 E057    | 241 | 0.8606 | 0.0259 | 0.9914 | 0.9996 |
| 0.001 E056    | 203 | 0.8589 | 0.0218 | 0.9863 | 0.9996 |
| 0.001 E004    | 201 | 0.8532 | 0.0216 | 0.9891 | 0.9996 |
| 0.001 E109    | 158 | 0.8328 | 0.0170 | 0.9905 | 0.9996 |
| 0.001 E084    | 140 | 0.8300 | 0.0150 | 0.9875 | 0.9996 |
| 0.001 E092    | 164 | 0.8121 | 0.0176 | 0.9969 | 0.9996 |
| 0.001 E003    | 152 | 0.8097 | 0.0163 | 0.9962 | 0.9996 |
| 1.00E-04 E085 | 11  | 0.8095 | 0.0105 | 0.7054 | 0.9996 |
| 0.001 E123    | 207 | 0.8081 | 0.0222 | 0.9993 | 0.9996 |
| 0.001 E119    | 167 | 0.8057 | 0.0179 | 0.9980 | 0.9996 |
| 1.00E-04 E126 | 22  | 0.8043 | 0.0211 | 0.8259 | 0.9996 |
| 1.00E-04 E022 | 21  | 0.7708 | 0.0201 | 0.8697 | 0.9996 |
| 1.00E-04 E123 | 22  | 0.7672 | 0.0211 | 0.8817 | 0.9996 |
| 1.00E-04 E046 | 13  | 0.7521 | 0.0125 | 0.8194 | 0.9996 |
| 1.00E-04 E057 | 23  | 0.7337 | 0.0221 | 0.9275 | 0.9996 |

|               |    |        |        |        |        |
|---------------|----|--------|--------|--------|--------|
| 1.00E-04 E094 | 8  | 0.7076 | 0.0077 | 0.7955 | 0.9996 |
| 1.00E-04 E119 | 16 | 0.6895 | 0.0153 | 0.9261 | 0.9996 |
| 1.00E-04 E084 | 13 | 0.6884 | 0.0125 | 0.8992 | 0.9996 |
| 1.00E-04 E109 | 14 | 0.6592 | 0.0134 | 0.9368 | 0.9996 |
| 1.00E-04 E034 | 13 | 0.6476 | 0.0125 | 0.9377 | 0.9996 |
| 1.00E-04 E033 | 10 | 0.6279 | 0.0096 | 0.9217 | 0.9996 |
| 1.00E-04 E093 | 14 | 0.6245 | 0.0134 | 0.9616 | 0.9996 |
| 1.00E-04 E117 | 13 | 0.5412 | 0.0125 | 0.9901 | 0.9996 |
| 1.00E-04 E116 | 9  | 0.3773 | 0.0086 | 0.9996 | 0.9996 |

For Review Only

ee separate worksheets). Features are  
 al., 2015; Nature 518:317-330). "DHS"  
 d across epigenomes and functionally  
 y rather than repression (see Roadmap  
 ific histone marks, noted in the  
 nap Epigenomics Consortium  
 :hin epigenetic feature. Q-value  
 lumn are presented.

### Roadmap Gr Roadmap Epi Anatomy

|               |                |             |
|---------------|----------------|-------------|
| Brain         | Fetal Brain Fe | BRAIN       |
| Brain         | Fetal Brain M  | BRAIN       |
| ES-deriv      | H1 Derived N   | ESC_DERIVED |
| Other         | Fetal Lung     | LUNG        |
| ENCODE2012    | HepG2 Hepat    | LIVER       |
| ESC           | H1 Cells       | ESC         |
| Thymus        | Fetal Thymus   | THYMUS      |
| Digestive     | Fetal Stomach  | GI_STOMACH  |
| Other         | Fetal Kidney   | KIDNEY      |
| Other         | Fetal Kidney   | KIDNEY      |
| Brain         | Fetal Brain Fe | BRAIN       |
| Brain         | Fetal Brain M  | BRAIN       |
| Heart         | Fetal Heart    | HEART       |
| Other         | Fetal Lung     | LUNG        |
| Muscle        | Psoas Muscle   | MUSCLE      |
| ES-deriv      | H1 BMP4 Der    | ESC_DERIVED |
| HSC & B-cell  | Primary mon    | BLOOD       |
| iPSC          | iPS DF 6.9 Cel | IPSC        |
| ENCODE2012    | HSMM Skelet    | MUSCLE      |
| Epithelial    | Foreskin Fibr  | SKIN        |
| ENCODE2012    | Monocytes-C    | BLOOD       |
| Muscle        | Fetal Muscle   | MUSCLE      |
| ES-deriv      | H1 Derived N   | ESC_DERIVED |
| IMR90         | IMR90 fetal l  | LUNG        |
| ENCODE2012    | NH-A Astrocy   | BRAIN       |
| ENCODE2012    | NHLF Lung Fil  | LUNG        |
| ES-deriv      | H1 BMP4 Der    | ESC_DERIVED |
| Other         | Ovary          | OVARY       |
| Brain         | Fetal Brain Fe | BRAIN       |
| HSC & B-cell  | Primary Natu   | BLOOD       |
| Epithelial    | Foreskin Fibr  | SKIN        |
| ENCODE2012    | HSMM cell de   | MUSCLE      |
| HSC & B-cell  | Primary hem    | BLOOD       |
| Blood & T-cel | Primary T cell | BLOOD       |

Epithelial Foreskin Fibro SKIN  
 HSC & B-cell Primary B cell BLOOD  
 HSC & B-cell Primary B cell BLOOD  
 Other Ovary OVARY  
 Muscle Fetal Muscle MUSCLE\_LEG  
 ES-deriv H1 Derived N ESC\_DERIVED  
 Other Placenta PLACENTA  
 Heart Fetal Heart HEART  
 HSC & B-cell Primary hemato BLOOD  
 Brain Fetal Brain M BRAIN  
 Blood & T-cell Primary T cell BLOOD  
 HSC & B-cell Primary B cell BLOOD  
 HSC & B-cell Primary Natu BLOOD  
 Other Fetal Kidney KIDNEY  
 ENCODE2012 A549 EtOH 0. LUNG  
 ESC H9 Cells ESC  
 ENCODE2012 Monocytes-C BLOOD  
 Muscle Fetal Muscle MUSCLE  
 Brain Fetal Brain Fe BRAIN  
 ES-deriv H1 Derived M ESC\_DERIVED  
 ENCODE2012 HMEC Mammary BREAST  
 Brain Fetal Brain M BRAIN  
 Muscle Psoas Muscle MUSCLE  
 Muscle Psoas Muscle MUSCLE  
 Digestive Fetal Stomach GI\_STOMACH  
 Thymus Fetal Thymus THYMUS  
 Blood & T-cell Primary T cell BLOOD  
 HSC & B-cell Primary hemato BLOOD  
 ENCODE2012 HeLa-S3 Cervix CERVIX  
 Other Placenta PLACENTA  
 Muscle Fetal Muscle MUSCLE\_LEG  
 HSC & B-cell Primary mono BLOOD  
 Epithelial Breast varian BREAST  
 Other Fetal Lung LUNG  
 ESC H1 Cells ESC  
 IMR90 IMR90 fetal LUNG  
 Digestive Fetal Intestine GI\_INTESTINE  
 ESC H9 Cells ESC  
 ENCODE2012 K562 Leukemia BLOOD  
 Digestive Gastric GI\_STOMACH  
 Muscle Fetal Muscle MUSCLE\_LEG  
 Heart Fetal Heart HEART  
 HSC & B-cell Primary hemato BLOOD

Digestive Small Intestin GI\_INTESTINE  
 iPSC iPS DF 19.11 (IPSC  
 ES-deriv H1 Derived M ESC\_DERIVED  
 HSC & B-cell Primary hemæ BLOOD  
 Other Pancreas PANCREAS  
 ENCODE2012 NHDF-Ad Adæ SKIN  
 Epithelial Foreskin Fibræ SKIN  
 ENCODE2012 HUVEC Umbil VASCULAR  
 ENCODE2012 Monocytes-C BLOOD  
 ENCODE2012 HepG2 Hepat LIVER  
 Epithelial Foreskin Fibræ SKIN  
 Other Fetal Lung LUNG  
 ES-deriv H1 BMP4 Der ESC\_DERIVED  
 Blood & T-cel Primary T cell BLOOD  
 ENCODE2012 HSMM Skelet MUSCLE  
 IMR90 IMR90 fetal læ LUNG  
 ENCODE2012 GM12878 Lyr BLOOD  
 iPSC iPS DF 6.9 Cel IPSC  
 ENCODE2012 HUVEC Umbil VASCULAR  
 Epithelial Foreskin Melæ SKIN  
 Other Fetal Kidney KIDNEY  
 Other Placenta PLACENTA  
 ENCODE2012 GM12878 Lyr BLOOD  
 Other Pancreas PANCREAS  
 iPSC iPS DF 6.9 Cel IPSC  
 ENCODE2012 HSMM cell dæ MUSCLE  
 Epithelial Foreskin Kera SKIN  
 Epithelial Foreskin Melæ SKIN  
 Other Fetal Adrenal ADRENAL  
 Other Fetal Adrenal ADRENAL  
 ENCODE2012 HepG2 Hepat LIVER  
 Other Ovary OVARY  
 ES-deriv H1 BMP4 Der ESC\_DERIVED  
 ENCODE2012 NH-A Astrocy BRAIN  
 Digestive Fetal Intestin GI\_INTESTINE  
 HSC & B-cell Primary monæ BLOOD  
 ENCODE2012 HepG2 Hepat LIVER  
 ENCODE2012 NHEK-Epiderr SKIN  
 Digestive Fetal Intestin GI\_INTESTINE  
 ENCODE2012 NHLF Lung Fil LUNG  
 Other Fetal Adrenal ADRENAL  
 ENCODE2012 NHLF Lung Fil LUNG  
 ESC H1 Cells ESC



iPSC            iPS DF 19.11 (IPSC  
 Epithelial      Breast varian BREAST  
 ENCODE2012 A549 EtOH 0. LUNG  
 ENCODE2012 HSMM Skelet MUSCLE  
 ENCODE2012 HUVEC Umbil VASCULAR  
 ENCODE2012 HeLa-S3 Cervi CERVIX  
 Digestive      Fetal Stomach GI\_STOMACH  
 ENCODE2012 NH-A Astrocy BRAIN  
 ES-deriv       H1 BMP4 Der ESC\_DERIVED  
 ES-deriv       H1 Derived N ESC\_DERIVED  
 Epithelial      Foreskin Fibr SKIN  
 HSC & B-cell   Primary hem BLOOD  
 ENCODE2012 NHEK-Epiderr SKIN  
 Muscle          Fetal Muscle MUSCLE\_LEG  
 Heart           Fetal Heart HEART  
 ENCODE2012 NHDF-Ad Ad SKIN  
 Thymus          Fetal Thymus THYMUS  
 Other           Pancreas PANCREAS  
 ENCODE2012 NHEK-Epiderr SKIN  
 ESC             H9 Cells ESC  
 Epithelial      Breast varian BREAST  
 ES-deriv       H1 Derived N ESC\_DERIVED  
 Digestive      Gastric GI\_STOMACH  
 ENCODE2012 A549 EtOH 0. LUNG  
 Epithelial      Foreskin Mel SKIN  
 Muscle          Fetal Muscle MUSCLE  
 ES-deriv       H1 BMP4 Der ESC\_DERIVED  
 ENCODE2012 HSMM cell de MUSCLE  
 Epithelial      Foreskin Kera SKIN  
 Epithelial      Foreskin Fibr SKIN  
 ES-deriv       H1 BMP4 Der ESC\_DERIVED  
 Digestive      Small Intestin GI\_INTESTINE  
 Digestive      Fetal Intestin GI\_INTESTINE  
 Digestive      Fetal Stomach GI\_STOMACH  
 ESC             H1 Cells ESC  
 Digestive      Fetal Intestin GI\_INTESTINE  
 ENCODE2012 K562 Leukem BLOOD  
 ENCODE2012 HMEC Mamr BREAST  
 ENCODE2012 NHDF-Ad Ad SKIN  
 iPSC            iPS DF 19.11 (IPSC  
 ENCODE2012 K562 Leukem BLOOD  
 HSC & B-cell   Primary Natu BLOOD  
 Epithelial      Foreskin Kera SKIN

Digestive Gastric GI\_STOMACH  
ENCODE2012 HMEC Mamr BREAST  
Digestive Fetal Intestin GI\_INTESTINE  
Digestive Small Intestin GI\_INTESTINE  
Blood & T-cel Primary T cell BLOOD  
Blood & T-cel Primary T cell BLOOD  
Thymus Fetal Thymus THYMUS  
ENCODE2012 HeLa-S3 Cervi CERVIX  
ENCODE2012 GM12878 Lyr BLOOD

For Review Only

| GWAS p-value | Roadmap EID | Roadmap Ty | Marker Coun | Enrichment S | Proportion | p-value |
|--------------|-------------|------------|-------------|--------------|------------|---------|
| 1.00E-04     | E097        | 10_TssBiv  | 3           | 21.9606      | 0.0029     | 0.0000  |
| 1.00E-04     | E005        | 10_TssBiv  | 5           | 14.1634      | 0.0048     | 0.0000  |
| 1.00E-04     | E033        | 12_EnhBiv  | 7           | 13.8871      | 0.0067     | 0.0000  |
| 1.00E-04     | E035        | 10_TssBiv  | 3           | 13.3484      | 0.0029     | 0.0001  |
| 1.00E-04     | E071        | 12_EnhBiv  | 11          | 11.6911      | 0.0105     | 0.0000  |
| 1.00E-04     | E049        | 3_TxFlnk   | 7           | 11.1549      | 0.0067     | 0.0000  |
| 1.00E-04     | E023        | 10_TssBiv  | 5           | 10.2585      | 0.0048     | 0.0000  |
| 1.00E-04     | E052        | 10_TssBiv  | 5           | 9.4970       | 0.0048     | 0.0000  |
| 1.00E-04     | E062        | 12_EnhBiv  | 6           | 8.9347       | 0.0058     | 0.0000  |
| 1.00E-04     | E069        | 12_EnhBiv  | 6           | 8.6710       | 0.0058     | 0.0000  |
| 1.00E-04     | E030        | 6_EnhG     | 24          | 8.0906       | 0.0230     | 0.0000  |
| 1.00E-04     | E035        | 12_EnhBiv  | 8           | 7.8378       | 0.0077     | 0.0000  |
| 1.00E-04     | E047        | 12_EnhBiv  | 8           | 7.5522       | 0.0077     | 0.0000  |
| 1.00E-05     | E089        | 6_EnhG     | 5           | 7.3614       | 0.0526     | 0.0001  |
| 1.00E-04     | E054        | 10_TssBiv  | 3           | 7.0750       | 0.0029     | 0.0010  |
| 1.00E-04     | E129        | 10_TssBiv  | 5           | 6.9443       | 0.0048     | 0.0001  |
| 1.00E-04     | E120        | 10_TssBiv  | 5           | 6.8682       | 0.0048     | 0.0001  |
| 1.00E-05     | E090        | 12_EnhBiv  | 4           | 6.1864       | 0.0421     | 0.0005  |
| 1.00E-04     | E031        | 12_EnhBiv  | 6           | 6.1212       | 0.0058     | 0.0001  |
| 1.00E-05     | E090        | 6_EnhG     | 5           | 5.9842       | 0.0526     | 0.0002  |
| 1.00E-04     | E050        | 12_EnhBiv  | 13          | 5.8457       | 0.0125     | 0.0000  |
| 0.001        | E004        | 11_BivFlnk | 3           | 5.7927       | 0.0003     | 0.0020  |
| 1.00E-04     | E121        | 10_TssBiv  | 3           | 5.7007       | 0.0029     | 0.0021  |
| 1.00E-04     | E125        | 10_TssBiv  | 3           | 5.5437       | 0.0029     | 0.0023  |
| 1.00E-04     | E090        | 10_TssBiv  | 4           | 5.3480       | 0.0038     | 0.0010  |
| 1.00E-04     | E067        | 10_TssBiv  | 3           | 5.0829       | 0.0029     | 0.0032  |
| 1.00E-04     | E024        | 10_TssBiv  | 3           | 4.9424       | 0.0029     | 0.0035  |
| 0.001        | E097        | 10_TssBiv  | 6           | 4.9168       | 0.0006     | 0.0003  |
| 1.00E-04     | E017        | 10_TssBiv  | 3           | 4.7180       | 0.0029     | 0.0041  |
| 1.00E-05     | E027        | 6_EnhG     | 3           | 4.5883       | 0.0316     | 0.0043  |
| 1.00E-04     | E068        | 10_TssBiv  | 3           | 4.5753       | 0.0029     | 0.0046  |
| 1.00E-04     | E032        | 12_EnhBiv  | 13          | 4.5746       | 0.0125     | 0.0000  |
| 1.00E-05     | E082        | 7_Enh      | 7           | 4.5066       | 0.0737     | 0.0002  |
| 1.00E-05     | E080        | 12_EnhBiv  | 3           | 4.5011       | 0.0316     | 0.0046  |
| 1.00E-04     | E041        | 12_EnhBiv  | 8           | 4.4652       | 0.0077     | 0.0001  |
| 1.00E-04     | E051        | 12_EnhBiv  | 10          | 4.4632       | 0.0096     | 0.0000  |
| 1.00E-04     | E011        | 3_TxFlnk   | 5           | 4.4597       | 0.0048     | 0.0011  |
| 1.00E-04     | E124        | 12_EnhBiv  | 7           | 4.4362       | 0.0067     | 0.0002  |
| 1.00E-04     | E049        | 6_EnhG     | 20          | 4.3662       | 0.0192     | 0.0000  |
| 1.00E-04     | E125        | 12_EnhBiv  | 3           | 4.1558       | 0.0029     | 0.0064  |
| 1.00E-04     | E124        | 6_EnhG     | 13          | 4.1221       | 0.0125     | 0.0000  |
| 1.00E-04     | E009        | 10_TssBiv  | 3           | 4.0665       | 0.0029     | 0.0069  |

|          |      |            |    |        |        |        |
|----------|------|------------|----|--------|--------|--------|
| 1.00E-04 | E111 | 6_EnhG     | 17 | 4.0433 | 0.0163 | 0.0000 |
| 1.00E-04 | E106 | 2_TssAFlnk | 3  | 3.9804 | 0.0029 | 0.0074 |
| 1.00E-04 | E021 | 10_TssBiv  | 5  | 3.9111 | 0.0048 | 0.0020 |
| 1.00E-04 | E108 | 10_TssBiv  | 3  | 3.8760 | 0.0029 | 0.0081 |
| 1.00E-04 | E046 | 12_EnhBiv  | 10 | 3.8506 | 0.0096 | 0.0001 |
| 1.00E-04 | E054 | 12_EnhBiv  | 3  | 3.7090 | 0.0029 | 0.0094 |
| 1.00E-04 | E069 | 10_TssBiv  | 4  | 3.6328 | 0.0038 | 0.0054 |
| 1.00E-04 | E017 | 12_EnhBiv  | 8  | 3.5014 | 0.0077 | 0.0006 |
| 1.00E-04 | E029 | 12_EnhBiv  | 9  | 3.4946 | 0.0086 | 0.0003 |
| 0.001    | E114 | 12_EnhBiv  | 8  | 3.4529 | 0.0009 | 0.0007 |
| 1.00E-04 | E028 | 12_EnhBiv  | 3  | 3.4302 | 0.0029 | 0.0122 |
| 1.00E-04 | E072 | 10_TssBiv  | 3  | 3.4019 | 0.0029 | 0.0125 |
| 1.00E-04 | E027 | 12_EnhBiv  | 5  | 3.3952 | 0.0048 | 0.0040 |
| 1.00E-04 | E100 | 10_TssBiv  | 3  | 3.3463 | 0.0029 | 0.0132 |
| 0.01     | E094 | 11_BivFlnk | 5  | 3.3413 | 0.0001 | 0.0044 |
| 1.00E-04 | E002 | 10_TssBiv  | 5  | 3.3373 | 0.0048 | 0.0044 |
| 1.00E-04 | E073 | 10_TssBiv  | 3  | 3.1719 | 0.0029 | 0.0158 |
| 1.00E-04 | E113 | 12_EnhBiv  | 3  | 3.1512 | 0.0029 | 0.0161 |
| 1.00E-04 | E012 | 11_BivFlnk | 3  | 3.1135 | 0.0029 | 0.0168 |
| 1.00E-04 | E108 | 6_EnhG     | 14 | 3.0527 | 0.0134 | 0.0001 |
| 0.01     | E104 | 11_BivFlnk | 3  | 2.9858 | 0.0000 | 0.0193 |
| 0.001    | E119 | 10_TssBiv  | 4  | 2.9808 | 0.0004 | 0.0121 |
| 1.00E-05 | E081 | 7_Enh      | 9  | 2.9695 | 0.0947 | 0.0009 |
| 1.00E-05 | E101 | 7_Enh      | 4  | 2.9509 | 0.0421 | 0.0119 |
| 1.00E-04 | E011 | 6_EnhG     | 7  | 2.8828 | 0.0067 | 0.0035 |
| 1.00E-05 | E070 | 7_Enh      | 6  | 2.8709 | 0.0632 | 0.0051 |
| 1.00E-04 | E025 | 10_TssBiv  | 3  | 2.8673 | 0.0029 | 0.0219 |
| 0.001    | E071 | 12_EnhBiv  | 24 | 2.8555 | 0.0026 | 0.0000 |
| 0.01     | E098 | 11_BivFlnk | 3  | 2.7789 | 0.0000 | 0.0243 |
| 1.00E-04 | E099 | 12_EnhBiv  | 3  | 2.6845 | 0.0029 | 0.0270 |
| 1.00E-04 | E008 | 10_TssBiv  | 5  | 2.6788 | 0.0048 | 0.0121 |
| 1.00E-04 | E066 | 6_EnhG     | 12 | 2.6575 | 0.0115 | 0.0008 |
| 1.00E-04 | E029 | 6_EnhG     | 9  | 2.6172 | 0.0086 | 0.0029 |
| 0.01     | E097 | 11_BivFlnk | 25 | 2.6046 | 0.0003 | 0.0000 |
| 1.00E-05 | E103 | 7_Enh      | 5  | 2.5957 | 0.0526 | 0.0130 |
| 1.00E-04 | E034 | 12_EnhBiv  | 14 | 2.5847 | 0.0134 | 0.0005 |
| 1.00E-04 | E022 | 11_BivFlnk | 4  | 2.5834 | 0.0038 | 0.0209 |
| 0.001    | E013 | 11_BivFlnk | 4  | 2.5797 | 0.0004 | 0.0210 |
| 1.00E-04 | E122 | 6_EnhG     | 8  | 2.5753 | 0.0077 | 0.0047 |
| 1.00E-04 | E004 | 10_TssBiv  | 3  | 2.5598 | 0.0029 | 0.0313 |
| 0.001    | E105 | 10_TssBiv  | 7  | 2.5543 | 0.0008 | 0.0072 |
| 0.001    | E023 | 10_TssBiv  | 11 | 2.5265 | 0.0012 | 0.0018 |
| 1.00E-04 | E120 | 2_TssAFlnk | 10 | 2.5205 | 0.0096 | 0.0026 |

|          |      |            |    |        |        |        |
|----------|------|------------|----|--------|--------|--------|
| 1.00E-04 | E061 | 12_EnhBiv  | 4  | 2.5098 | 0.0038 | 0.0232 |
| 1.00E-04 | E013 | 10_TssBiv  | 3  | 2.5093 | 0.0029 | 0.0333 |
| 1.00E-05 | E002 | 7_Enh      | 3  | 2.4679 | 0.0316 | 0.0341 |
| 0.001    | E017 | 10_TssBiv  | 14 | 2.4648 | 0.0015 | 0.0008 |
| 0.001    | E033 | 12_EnhBiv  | 11 | 2.4429 | 0.0012 | 0.0024 |
| 0.001    | E021 | 6_EnhG     | 10 | 2.3942 | 0.0011 | 0.0039 |
| 1.00E-04 | E088 | 6_EnhG     | 5  | 2.3797 | 0.0048 | 0.0204 |
| 1.00E-05 | E079 | 7_Enh      | 4  | 2.3541 | 0.0421 | 0.0282 |
| 1.00E-04 | E083 | 12_EnhBiv  | 3  | 2.3512 | 0.0029 | 0.0406 |
| 1.00E-05 | E111 | 7_Enh      | 4  | 2.3264 | 0.0421 | 0.0295 |
| 0.01     | E094 | 12_EnhBiv  | 6  | 2.3196 | 0.0001 | 0.0167 |
| 1.00E-04 | E056 | 6_EnhG     | 17 | 2.3065 | 0.0163 | 0.0006 |
| 1.00E-04 | E030 | 12_EnhBiv  | 3  | 2.3054 | 0.0029 | 0.0431 |
| 1.00E-04 | E099 | 2_TssAFlnk | 3  | 2.3046 | 0.0029 | 0.0432 |
| 1.00E-04 | E113 | 6_EnhG     | 15 | 2.2994 | 0.0144 | 0.0012 |
| 0.001    | E072 | 3_TxFlnk   | 4  | 2.2888 | 0.0004 | 0.0327 |
| 1.00E-04 | E020 | 6_EnhG     | 3  | 2.2585 | 0.0029 | 0.0459 |
| 1.00E-04 | E092 | 2_TssAFlnk | 5  | 2.2462 | 0.0048 | 0.0260 |
| 1.00E-04 | E013 | 6_EnhG     | 10 | 2.2022 | 0.0096 | 0.0070 |
| 1.00E-05 | E089 | 12_EnhBiv  | 3  | 2.2003 | 0.0316 | 0.0484 |
| 0.001    | E114 | 11_BivFlnk | 4  | 2.1840 | 0.0004 | 0.0387 |
| 0.01     | E097 | 10_TssBiv  | 27 | 2.1701 | 0.0003 | 0.0001 |
| 0.001    | E079 | 11_BivFlnk | 6  | 2.1662 | 0.0006 | 0.0232 |
| 0.001    | E074 | 12_EnhBiv  | 8  | 2.1654 | 0.0009 | 0.0136 |
| 0.001    | E122 | 6_EnhG     | 59 | 2.1262 | 0.0063 | 0.0000 |
| 1.00E-04 | E067 | 2_TssAFlnk | 7  | 2.1022 | 0.0067 | 0.0205 |
| 1.00E-04 | E050 | 6_EnhG     | 7  | 2.0975 | 0.0067 | 0.0208 |
| 1.00E-05 | E122 | 7_Enh      | 6  | 2.0945 | 0.0632 | 0.0251 |
| 1.00E-04 | E022 | 6_EnhG     | 18 | 2.0815 | 0.0173 | 0.0015 |
| 0.01     | E117 | 11_BivFlnk | 7  | 2.0790 | 0.0001 | 0.0219 |
| 0.001    | E099 | 6_EnhG     | 16 | 2.0730 | 0.0017 | 0.0026 |
| 1.00E-04 | E073 | 2_TssAFlnk | 7  | 2.0380 | 0.0067 | 0.0241 |
| 1.00E-04 | E086 | 7_Enh      | 35 | 2.0331 | 0.0336 | 0.0000 |
| 1.00E-05 | E052 | 7_Enh      | 7  | 2.0300 | 0.0737 | 0.0224 |
| 0.001    | E103 | 12_EnhBiv  | 3  | 2.0152 | 0.0003 | 0.0642 |
| 1.00E-04 | E061 | 11_BivFlnk | 3  | 2.0144 | 0.0029 | 0.0642 |
| 1.00E-04 | E095 | 6_EnhG     | 9  | 2.0137 | 0.0086 | 0.0162 |
| 1.00E-04 | E110 | 2_TssAFlnk | 4  | 2.0106 | 0.0038 | 0.0515 |
| 1.00E-04 | E089 | 12_EnhBiv  | 30 | 2.0041 | 0.0288 | 0.0002 |
| 1.00E-04 | E105 | 7_Enh      | 50 | 2.0037 | 0.0479 | 0.0000 |
| 1.00E-04 | E091 | 12_EnhBiv  | 9  | 2.0037 | 0.0086 | 0.0167 |
| 0.001    | E062 | 12_EnhBiv  | 12 | 2.0004 | 0.0013 | 0.0088 |
| 0.001    | E120 | 10_TssBiv  | 13 | 1.9991 | 0.0014 | 0.0071 |

|          |      |            |    |        |        |        |
|----------|------|------------|----|--------|--------|--------|
| 1.00E-05 | E055 | 7_Enh      | 6  | 1.9772 | 0.0632 | 0.0328 |
| 1.00E-04 | E080 | 2_TssAFlnk | 7  | 1.9762 | 0.0067 | 0.0282 |
| 1.00E-04 | E036 | 12_EnhBiv  | 3  | 1.9589 | 0.0029 | 0.0695 |
| 1.00E-04 | E080 | 6_EnhG     | 15 | 1.9482 | 0.0144 | 0.0057 |
| 0.001    | E069 | 12_EnhBiv  | 12 | 1.9414 | 0.0013 | 0.0110 |
| 0.001    | E007 | 2_TssAFlnk | 13 | 1.9406 | 0.0014 | 0.0090 |
| 1.00E-04 | E091 | 6_EnhG     | 10 | 1.9397 | 0.0096 | 0.0165 |
| 1.00E-04 | E108 | 12_EnhBiv  | 4  | 1.9278 | 0.0038 | 0.0595 |
| 0.001    | E100 | 12_EnhBiv  | 4  | 1.9202 | 0.0004 | 0.0604 |
| 1.00E-04 | E092 | 6_EnhG     | 13 | 1.9160 | 0.0125 | 0.0098 |
| 0.001    | E105 | 3_TxFlnk   | 4  | 1.9125 | 0.0004 | 0.0613 |
| 1.00E-04 | E071 | 6_EnhG     | 6  | 1.9124 | 0.0058 | 0.0407 |
| 1.00E-04 | E058 | 11_BivFlnk | 3  | 1.9116 | 0.0029 | 0.0745 |
| 1.00E-04 | E111 | 12_EnhBiv  | 3  | 1.9110 | 0.0029 | 0.0746 |
| 1.00E-04 | E056 | 11_BivFlnk | 4  | 1.9049 | 0.0038 | 0.0619 |
| 0.001    | E005 | 10_TssBiv  | 6  | 1.9026 | 0.0006 | 0.0418 |
| 0.001    | E097 | 6_EnhG     | 23 | 1.8952 | 0.0025 | 0.0017 |
| 0.01     | E004 | 11_BivFlnk | 10 | 1.8939 | 0.0001 | 0.0195 |
| 0.01     | E066 | 11_BivFlnk | 31 | 1.8784 | 0.0003 | 0.0005 |
| 1.00E-05 | E120 | 7_Enh      | 5  | 1.8762 | 0.0526 | 0.0514 |
| 1.00E-04 | E117 | 6_EnhG     | 4  | 1.8675 | 0.0038 | 0.0662 |
| 1.00E-04 | E056 | 7_Enh      | 39 | 1.8664 | 0.0374 | 0.0001 |
| 0.01     | E117 | 10_TssBiv  | 14 | 1.8658 | 0.0001 | 0.0103 |
| 0.001    | E035 | 12_EnhBiv  | 17 | 1.8645 | 0.0018 | 0.0060 |
| 0.001    | E125 | 10_TssBiv  | 9  | 1.8618 | 0.0010 | 0.0262 |
| 0.01     | E053 | 10_TssBiv  | 41 | 1.8611 | 0.0004 | 0.0001 |
| 0.001    | E125 | 12_EnhBiv  | 12 | 1.8609 | 0.0013 | 0.0151 |
| 0.001    | E066 | 11_BivFlnk | 3  | 1.8534 | 0.0003 | 0.0814 |
| 1.00E-04 | E003 | 11_BivFlnk | 3  | 1.8370 | 0.0029 | 0.0833 |
| 1.00E-04 | E083 | 2_TssAFlnk | 7  | 1.8355 | 0.0067 | 0.0405 |
| 1.00E-05 | E108 | 7_Enh      | 6  | 1.8272 | 0.0632 | 0.0468 |
| 1.00E-05 | E063 | 7_Enh      | 6  | 1.8187 | 0.0632 | 0.0478 |
| 1.00E-04 | E087 | 7_Enh      | 25 | 1.8175 | 0.0240 | 0.0019 |
| 1.00E-04 | E005 | 6_EnhG     | 10 | 1.8150 | 0.0096 | 0.0252 |
| 1.00E-05 | E022 | 7_Enh      | 5  | 1.8124 | 0.0526 | 0.0588 |
| 1.00E-04 | E104 | 2_TssAFlnk | 3  | 1.8124 | 0.0029 | 0.0865 |
| 0.01     | E079 | 11_BivFlnk | 51 | 1.8060 | 0.0005 | 0.0000 |
| 0.001    | E054 | 12_EnhBiv  | 13 | 1.7992 | 0.0014 | 0.0163 |
| 1.00E-05 | E078 | 7_Enh      | 3  | 1.7952 | 0.0316 | 0.0872 |
| 0.001    | E065 | 2_TssAFlnk | 6  | 1.7851 | 0.0006 | 0.0551 |
| 0.001    | E106 | 2_TssAFlnk | 12 | 1.7824 | 0.0013 | 0.0206 |
| 1.00E-04 | E078 | 6_EnhG     | 3  | 1.7787 | 0.0029 | 0.0910 |
| 1.00E-04 | E104 | 7_Enh      | 48 | 1.7747 | 0.0460 | 0.0001 |

|          |      |            |    |        |        |        |
|----------|------|------------|----|--------|--------|--------|
| 1.00E-04 | E019 | 10_TssBiv  | 6  | 1.7618 | 0.0058 | 0.0579 |
| 1.00E-04 | E073 | 6_EnhG     | 4  | 1.7591 | 0.0038 | 0.0805 |
| 0.001    | E066 | 3_TxFlnk   | 4  | 1.7575 | 0.0004 | 0.0809 |
| 0.001    | E021 | 10_TssBiv  | 20 | 1.7513 | 0.0021 | 0.0069 |
| 1.00E-04 | E084 | 6_EnhG     | 7  | 1.7501 | 0.0067 | 0.0508 |
| 0.01     | E041 | 10_TssBiv  | 35 | 1.7483 | 0.0004 | 0.0008 |
| 1.00E-05 | E102 | 7_Enh      | 4  | 1.7451 | 0.0421 | 0.0804 |
| 1.00E-05 | E076 | 7_Enh      | 5  | 1.7430 | 0.0526 | 0.0682 |
| 1.00E-04 | E067 | 6_EnhG     | 3  | 1.7362 | 0.0029 | 0.0972 |
| 1.00E-04 | E061 | 7_Enh      | 66 | 1.7354 | 0.0633 | 0.0000 |
| 1.00E-04 | E091 | 2_TssAFlnk | 6  | 1.7269 | 0.0058 | 0.0630 |
| 0.01     | E104 | 10_TssBiv  | 8  | 1.7245 | 0.0001 | 0.0470 |
| 1.00E-04 | E011 | 10_TssBiv  | 3  | 1.7196 | 0.0029 | 0.0998 |
| 1.00E-04 | E076 | 2_TssAFlnk | 7  | 1.7062 | 0.0067 | 0.0571 |
| 0.001    | E121 | 10_TssBiv  | 8  | 1.7018 | 0.0009 | 0.0503 |
| 0.001    | E052 | 10_TssBiv  | 8  | 1.7010 | 0.0009 | 0.0504 |
| 0.01     | E097 | 3_TxFlnk   | 9  | 1.7010 | 0.0001 | 0.0436 |
| 1.00E-04 | E072 | 6_EnhG     | 5  | 1.6992 | 0.0048 | 0.0779 |
| 0.001    | E030 | 6_EnhG     | 45 | 1.6982 | 0.0048 | 0.0004 |
| 0.001    | E125 | 3_TxFlnk   | 6  | 1.6868 | 0.0006 | 0.0697 |
| 1.00E-05 | E088 | 7_Enh      | 6  | 1.6804 | 0.0632 | 0.0671 |
| 0.001    | E033 | 11_BivFlnk | 9  | 1.6734 | 0.0010 | 0.0477 |
| 0.01     | E128 | 11_BivFlnk | 23 | 1.6681 | 0.0002 | 0.0079 |
| 0.01     | E040 | 11_BivFlnk | 34 | 1.6671 | 0.0004 | 0.0020 |
| 1.00E-04 | E063 | 12_EnhBiv  | 3  | 1.6610 | 0.0029 | 0.1095 |
| 1.00E-04 | E103 | 2_TssAFlnk | 7  | 1.6486 | 0.0067 | 0.0668 |
| 0.01     | E031 | 11_BivFlnk | 78 | 1.6406 | 0.0008 | 0.0000 |
| 1.00E-04 | E090 | 2_TssAFlnk | 6  | 1.6395 | 0.0058 | 0.0779 |
| 0.001    | E012 | 11_BivFlnk | 14 | 1.6266 | 0.0015 | 0.0300 |
| 0.001    | E083 | 6_EnhG     | 18 | 1.6248 | 0.0019 | 0.0188 |
| 0.001    | E117 | 6_EnhG     | 31 | 1.6202 | 0.0033 | 0.0044 |
| 1.00E-04 | E066 | 7_Enh      | 58 | 1.6192 | 0.0556 | 0.0002 |
| 0.001    | E005 | 11_BivFlnk | 12 | 1.6158 | 0.0013 | 0.0400 |
| 1.00E-04 | E080 | 7_Enh      | 60 | 1.6156 | 0.0575 | 0.0002 |
| 0.01     | E046 | 11_BivFlnk | 86 | 1.6127 | 0.0009 | 0.0000 |
| 1.00E-04 | E092 | 12_EnhBiv  | 10 | 1.6117 | 0.0096 | 0.0511 |
| 0.001    | E071 | 11_BivFlnk | 13 | 1.6100 | 0.0014 | 0.0364 |
| 1.00E-04 | E089 | 6_EnhG     | 12 | 1.6092 | 0.0115 | 0.0405 |
| 1.00E-04 | E034 | 6_EnhG     | 12 | 1.5980 | 0.0115 | 0.0424 |
| 1.00E-04 | E051 | 11_BivFlnk | 4  | 1.5971 | 0.0038 | 0.1092 |
| 1.00E-04 | E115 | 7_Enh      | 31 | 1.5963 | 0.0297 | 0.0050 |
| 1.00E-04 | E014 | 10_TssBiv  | 5  | 1.5919 | 0.0048 | 0.0985 |
| 1.00E-04 | E111 | 7_Enh      | 30 | 1.5893 | 0.0288 | 0.0060 |

|          |      |            |     |        |        |        |
|----------|------|------------|-----|--------|--------|--------|
| 0.001    | E047 | 12_EnhBiv  | 15  | 1.5852 | 0.0016 | 0.0324 |
| 0.001    | E091 | 6_EnhG     | 73  | 1.5851 | 0.0078 | 0.0001 |
| 1.00E-04 | E074 | 2_TssAFlnk | 6   | 1.5842 | 0.0058 | 0.0893 |
| 0.001    | E054 | 10_TssBiv  | 6   | 1.5840 | 0.0006 | 0.0897 |
| 0.01     | E035 | 3_TxFlnk   | 14  | 1.5781 | 0.0001 | 0.0374 |
| 1.00E-04 | E043 | 6_EnhG     | 9   | 1.5643 | 0.0086 | 0.0674 |
| 0.001    | E105 | 11_BivFlnk | 5   | 1.5632 | 0.0005 | 0.1052 |
| 0.01     | E120 | 11_BivFlnk | 16  | 1.5625 | 0.0002 | 0.0326 |
| 1.00E-04 | E107 | 6_EnhG     | 8   | 1.5617 | 0.0077 | 0.0759 |
| 0.01     | E007 | 10_TssBiv  | 70  | 1.5596 | 0.0007 | 0.0002 |
| 0.001    | E128 | 10_TssBiv  | 8   | 1.5554 | 0.0009 | 0.0778 |
| 0.01     | E038 | 3_TxFlnk   | 46  | 1.5553 | 0.0005 | 0.0019 |
| 1.00E-04 | E044 | 2_TssAFlnk | 11  | 1.5533 | 0.0105 | 0.0565 |
| 0.01     | E077 | 3_TxFlnk   | 64  | 1.5532 | 0.0007 | 0.0004 |
| 1.00E-04 | E070 | 2_TssAFlnk | 7   | 1.5510 | 0.0067 | 0.0872 |
| 1.00E-04 | E090 | 12_EnhBiv  | 11  | 1.5496 | 0.0105 | 0.0573 |
| 1.00E-04 | E053 | 2_TssAFlnk | 8   | 1.5457 | 0.0077 | 0.0797 |
| 1.00E-04 | E101 | 7_Enh      | 23  | 1.5455 | 0.0221 | 0.0172 |
| 1.00E-04 | E105 | 6_EnhG     | 6   | 1.5448 | 0.0058 | 0.0985 |
| 0.01     | E043 | 3_TxFlnk   | 44  | 1.5446 | 0.0005 | 0.0026 |
| 0.001    | E073 | 12_EnhBiv  | 7   | 1.5385 | 0.0008 | 0.0907 |
| 1.00E-05 | E058 | 7_Enh      | 5   | 1.5352 | 0.0526 | 0.1084 |
| 1.00E-04 | E027 | 6_EnhG     | 11  | 1.5324 | 0.0105 | 0.0612 |
| 1.00E-04 | E001 | 10_TssBiv  | 6   | 1.5278 | 0.0058 | 0.1028 |
| 0.01     | E069 | 3_TxFlnk   | 24  | 1.5264 | 0.0003 | 0.0186 |
| 0.01     | E122 | 11_BivFlnk | 76  | 1.5235 | 0.0008 | 0.0002 |
| 0.001    | E072 | 10_TssBiv  | 12  | 1.5233 | 0.0013 | 0.0580 |
| 1.00E-04 | E051 | 6_EnhG     | 6   | 1.5197 | 0.0058 | 0.1050 |
| 0.01     | E059 | 11_BivFlnk | 159 | 1.5196 | 0.0017 | 0.0000 |
| 0.001    | E129 | 6_EnhG     | 59  | 1.5186 | 0.0063 | 0.0010 |
| 0.001    | E097 | 12_EnhBiv  | 3   | 1.5181 | 0.0003 | 0.1386 |
| 0.01     | E063 | 3_TxFlnk   | 44  | 1.5129 | 0.0005 | 0.0037 |
| 0.001    | E050 | 12_EnhBiv  | 30  | 1.5101 | 0.0032 | 0.0123 |
| 1.00E-04 | E083 | 7_Enh      | 80  | 1.5065 | 0.0767 | 0.0001 |
| 1.00E-04 | E095 | 7_Enh      | 48  | 1.5051 | 0.0460 | 0.0025 |
| 0.001    | E061 | 11_BivFlnk | 20  | 1.5033 | 0.0021 | 0.0307 |
| 0.001    | E088 | 11_BivFlnk | 7   | 1.5005 | 0.0008 | 0.1008 |
| 0.001    | E040 | 11_BivFlnk | 3   | 1.4998 | 0.0003 | 0.1429 |
| 0.01     | E050 | 3_TxFlnk   | 31  | 1.4973 | 0.0003 | 0.0127 |
| 0.001    | E115 | 11_BivFlnk | 6   | 1.4966 | 0.0006 | 0.1116 |
| 0.001    | E117 | 3_TxFlnk   | 10  | 1.4958 | 0.0011 | 0.0776 |
| 0.001    | E125 | 6_EnhG     | 29  | 1.4957 | 0.0031 | 0.0151 |
| 0.001    | E086 | 6_EnhG     | 8   | 1.4954 | 0.0009 | 0.0933 |



|          |      |            |     |        |        |        |
|----------|------|------------|-----|--------|--------|--------|
| 0.001    | E035 | 10_TssBiv  | 3   | 1.4943 | 0.0003 | 0.1442 |
| 0.01     | E008 | 11_BivFlnk | 18  | 1.4942 | 0.0002 | 0.0386 |
| 1.00E-04 | E026 | 1_TssA     | 12  | 1.4900 | 0.0115 | 0.0656 |
| 0.001    | E047 | 11_BivFlnk | 3   | 1.4896 | 0.0003 | 0.1454 |
| 0.001    | E129 | 12_EnhBiv  | 8   | 1.4895 | 0.0009 | 0.0949 |
| 0.001    | E006 | 3_TxFlnk   | 5   | 1.4890 | 0.0005 | 0.1242 |
| 1.00E-04 | E072 | 7_Enh      | 39  | 1.4880 | 0.0374 | 0.0066 |
| 0.01     | E006 | 11_BivFlnk | 75  | 1.4853 | 0.0008 | 0.0005 |
| 1.00E-05 | E013 | 7_Enh      | 4   | 1.4844 | 0.0421 | 0.1335 |
| 0.001    | E119 | 3_TxFlnk   | 6   | 1.4827 | 0.0006 | 0.1156 |
| 1.00E-04 | E068 | 7_Enh      | 42  | 1.4824 | 0.0403 | 0.0055 |
| 1.00E-04 | E016 | 10_TssBiv  | 6   | 1.4816 | 0.0058 | 0.1155 |
| 1.00E-04 | E020 | 10_TssBiv  | 6   | 1.4789 | 0.0058 | 0.1163 |
| 0.001    | E096 | 6_EnhG     | 55  | 1.4764 | 0.0059 | 0.0024 |
| 0.01     | E095 | 11_BivFlnk | 38  | 1.4758 | 0.0004 | 0.0089 |
| 0.001    | E007 | 12_EnhBiv  | 5   | 1.4729 | 0.0005 | 0.1287 |
| 0.001    | E096 | 12_EnhBiv  | 9   | 1.4702 | 0.0010 | 0.0925 |
| 1.00E-04 | E120 | 7_Enh      | 43  | 1.4696 | 0.0412 | 0.0058 |
| 1.00E-04 | E072 | 2_TssAFlnk | 7   | 1.4695 | 0.0067 | 0.1094 |
| 0.01     | E065 | 3_TxFlnk   | 9   | 1.4669 | 0.0001 | 0.0935 |
| 0.001    | E119 | 11_BivFlnk | 7   | 1.4646 | 0.0008 | 0.1113 |
| 0.01     | E113 | 11_BivFlnk | 19  | 1.4630 | 0.0002 | 0.0423 |
| 1.00E-04 | E057 | 10_TssBiv  | 3   | 1.4614 | 0.0029 | 0.1523 |
| 0.001    | E073 | 11_BivFlnk | 4   | 1.4579 | 0.0004 | 0.1436 |
| 1.00E-05 | E099 | 7_Enh      | 3   | 1.4556 | 0.0316 | 0.1521 |
| 1.00E-04 | E081 | 2_TssAFlnk | 4   | 1.4552 | 0.0038 | 0.1442 |
| 0.01     | E061 | 11_BivFlnk | 197 | 1.4524 | 0.0021 | 0.0000 |
| 0.001    | E066 | 12_EnhBiv  | 12  | 1.4520 | 0.0013 | 0.0773 |
| 1.00E-04 | E027 | 7_Enh      | 67  | 1.4500 | 0.0642 | 0.0012 |
| 0.001    | E026 | 6_EnhG     | 45  | 1.4496 | 0.0048 | 0.0070 |
| 0.01     | E120 | 10_TssBiv  | 96  | 1.4479 | 0.0010 | 0.0002 |
| 1.00E-04 | E077 | 7_Enh      | 35  | 1.4466 | 0.0336 | 0.0137 |
| 1.00E-04 | E048 | 2_TssAFlnk | 7   | 1.4444 | 0.0067 | 0.1173 |
| 1.00E-04 | E044 | 6_EnhG     | 6   | 1.4442 | 0.0058 | 0.1270 |
| 0.01     | E115 | 11_BivFlnk | 59  | 1.4435 | 0.0006 | 0.0030 |
| 1.00E-04 | E049 | 1_TssA     | 9   | 1.4416 | 0.0086 | 0.1010 |
| 1.00E-04 | E055 | 7_Enh      | 48  | 1.4407 | 0.0460 | 0.0057 |
| 1.00E-04 | E062 | 6_EnhG     | 4   | 1.4400 | 0.0038 | 0.1486 |
| 0.01     | E005 | 11_BivFlnk | 109 | 1.4395 | 0.0011 | 0.0001 |
| 0.01     | E032 | 11_BivFlnk | 92  | 1.4393 | 0.0010 | 0.0004 |
| 0.001    | E128 | 6_EnhG     | 50  | 1.4387 | 0.0054 | 0.0057 |
| 0.001    | E003 | 6_EnhG     | 14  | 1.4385 | 0.0015 | 0.0701 |
| 0.001    | E088 | 6_EnhG     | 27  | 1.4385 | 0.0029 | 0.0273 |

|          |      |            |     |        |        |        |
|----------|------|------------|-----|--------|--------|--------|
| 0.001    | E049 | 11_BivFlnk | 8   | 1.4333 | 0.0009 | 0.1126 |
| 0.01     | E090 | 3_TxFlnk   | 60  | 1.4331 | 0.0006 | 0.0032 |
| 0.01     | E101 | 11_BivFlnk | 71  | 1.4316 | 0.0007 | 0.0016 |
| 0.001    | E122 | 11_BivFlnk | 7   | 1.4307 | 0.0008 | 0.1224 |
| 1.00E-04 | E109 | 7_Enh      | 21  | 1.4259 | 0.0201 | 0.0442 |
| 1.00E-04 | E002 | 7_Enh      | 19  | 1.4237 | 0.0182 | 0.0517 |
| 1.00E-04 | E038 | 2_TssAFlnk | 8   | 1.4225 | 0.0077 | 0.1159 |
| 0.01     | E030 | 11_BivFlnk | 122 | 1.4218 | 0.0013 | 0.0001 |
| 0.001    | E120 | 12_EnhBiv  | 3   | 1.4215 | 0.0003 | 0.1633 |
| 0.01     | E047 | 10_TssBiv  | 19  | 1.4209 | 0.0002 | 0.0536 |
| 1.00E-04 | E041 | 6_EnhG     | 9   | 1.4198 | 0.0086 | 0.1086 |
| 0.01     | E103 | 11_BivFlnk | 30  | 1.4182 | 0.0003 | 0.0262 |
| 1.00E-04 | E055 | 11_BivFlnk | 3   | 1.4152 | 0.0029 | 0.1650 |
| 0.001    | E006 | 11_BivFlnk | 7   | 1.4134 | 0.0008 | 0.1284 |
| 1.00E-04 | E078 | 2_TssAFlnk | 5   | 1.4115 | 0.0048 | 0.1477 |
| 0.001    | E113 | 12_EnhBiv  | 12  | 1.4110 | 0.0013 | 0.0911 |
| 1.00E-04 | E097 | 7_Enh      | 38  | 1.4087 | 0.0364 | 0.0160 |
| 0.01     | E035 | 11_BivFlnk | 80  | 1.4085 | 0.0008 | 0.0014 |
| 0.01     | E009 | 11_BivFlnk | 63  | 1.4050 | 0.0007 | 0.0041 |
| 0.001    | E083 | 12_EnhBiv  | 16  | 1.4038 | 0.0017 | 0.0717 |
| 0.01     | E037 | 11_BivFlnk | 21  | 1.4003 | 0.0002 | 0.0530 |
| 0.001    | E086 | 2_TssAFlnk | 22  | 1.3996 | 0.0024 | 0.0498 |
| 0.001    | E129 | 10_TssBiv  | 9   | 1.3993 | 0.0010 | 0.1168 |
| 0.001    | E051 | 12_EnhBiv  | 28  | 1.3990 | 0.0030 | 0.0344 |
| 0.01     | E114 | 12_EnhBiv  | 33  | 1.3970 | 0.0003 | 0.0260 |
| 0.01     | E033 | 12_EnhBiv  | 64  | 1.3941 | 0.0007 | 0.0045 |
| 0.01     | E114 | 11_BivFlnk | 26  | 1.3924 | 0.0003 | 0.0410 |
| 1.00E-04 | E096 | 7_Enh      | 30  | 1.3886 | 0.0288 | 0.0318 |
| 0.001    | E053 | 10_TssBiv  | 3   | 1.3884 | 0.0003 | 0.1730 |
| 0.01     | E107 | 3_TxFlnk   | 145 | 1.3879 | 0.0015 | 0.0001 |
| 0.001    | E025 | 6_EnhG     | 70  | 1.3875 | 0.0075 | 0.0036 |
| 0.01     | E103 | 12_EnhBiv  | 21  | 1.3836 | 0.0002 | 0.0586 |
| 1.00E-04 | E105 | 2_TssAFlnk | 4   | 1.3833 | 0.0038 | 0.1666 |
| 0.01     | E100 | 11_BivFlnk | 47  | 1.3819 | 0.0005 | 0.0136 |
| 0.01     | E084 | 3_TxFlnk   | 38  | 1.3806 | 0.0004 | 0.0226 |
| 0.01     | E129 | 11_BivFlnk | 50  | 1.3799 | 0.0005 | 0.0118 |
| 0.001    | E106 | 12_EnhBiv  | 13  | 1.3786 | 0.0014 | 0.0975 |
| 1.00E-04 | E113 | 7_Enh      | 36  | 1.3779 | 0.0345 | 0.0244 |
| 1.00E-05 | E067 | 7_Enh      | 3   | 1.3705 | 0.0316 | 0.1766 |
| 0.001    | E071 | 3_TxFlnk   | 3   | 1.3705 | 0.0003 | 0.1785 |
| 1.00E-04 | E122 | 7_Enh      | 43  | 1.3672 | 0.0412 | 0.0182 |
| 0.01     | E121 | 11_BivFlnk | 9   | 1.3669 | 0.0001 | 0.1300 |
| 1.00E-04 | E080 | 12_EnhBiv  | 10  | 1.3666 | 0.0096 | 0.1218 |

|          |      |            |     |        |        |        |
|----------|------|------------|-----|--------|--------|--------|
| 1.00E-04 | E048 | 7_Enh      | 33  | 1.3662 | 0.0316 | 0.0321 |
| 1.00E-04 | E129 | 7_Enh      | 49  | 1.3651 | 0.0470 | 0.0134 |
| 0.01     | E126 | 10_TssBiv  | 54  | 1.3650 | 0.0006 | 0.0116 |
| 0.001    | E068 | 12_EnhBiv  | 4   | 1.3578 | 0.0004 | 0.1757 |
| 0.01     | E062 | 3_TxFlnk   | 35  | 1.3570 | 0.0004 | 0.0330 |
| 0.01     | E022 | 3_TxFlnk   | 176 | 1.3517 | 0.0019 | 0.0001 |
| 0.01     | E125 | 3_TxFlnk   | 49  | 1.3511 | 0.0005 | 0.0175 |
| 0.01     | E089 | 3_TxFlnk   | 35  | 1.3503 | 0.0004 | 0.0350 |
| 0.001    | E124 | 12_EnhBiv  | 19  | 1.3480 | 0.0020 | 0.0803 |
| 0.01     | E091 | 11_BivFlnk | 98  | 1.3448 | 0.0010 | 0.0021 |
| 0.01     | E071 | 3_TxFlnk   | 30  | 1.3442 | 0.0003 | 0.0471 |
| 0.01     | E099 | 11_BivFlnk | 33  | 1.3394 | 0.0003 | 0.0424 |
| 1.00E-04 | E125 | 7_Enh      | 40  | 1.3389 | 0.0384 | 0.0287 |
| 0.01     | E085 | 11_BivFlnk | 115 | 1.3378 | 0.0012 | 0.0012 |
| 1.00E-04 | E073 | 7_Enh      | 27  | 1.3374 | 0.0259 | 0.0556 |
| 0.01     | E034 | 11_BivFlnk | 185 | 1.3344 | 0.0019 | 0.0001 |
| 1.00E-04 | E098 | 2_TssAFlnk | 4   | 1.3342 | 0.0038 | 0.1842 |
| 0.01     | E033 | 11_BivFlnk | 73  | 1.3313 | 0.0008 | 0.0078 |
| 0.01     | E076 | 10_TssBiv  | 91  | 1.3309 | 0.0010 | 0.0037 |
| 0.01     | E095 | 10_TssBiv  | 56  | 1.3280 | 0.0006 | 0.0169 |
| 0.01     | E032 | 3_TxFlnk   | 49  | 1.3280 | 0.0005 | 0.0229 |
| 0.001    | E121 | 6_EnhG     | 27  | 1.3278 | 0.0029 | 0.0613 |
| 0.01     | E028 | 11_BivFlnk | 10  | 1.3270 | 0.0001 | 0.1408 |
| 1.00E-04 | E128 | 7_Enh      | 35  | 1.3256 | 0.0336 | 0.0414 |
| 0.001    | E069 | 10_TssBiv  | 13  | 1.3217 | 0.0014 | 0.1237 |
| 1.00E-04 | E052 | 7_Enh      | 50  | 1.3207 | 0.0479 | 0.0218 |
| 0.001    | E005 | 6_EnhG     | 65  | 1.3207 | 0.0070 | 0.0127 |
| 1.00E-05 | E105 | 7_Enh      | 3   | 1.3199 | 0.0316 | 0.1934 |
| 0.001    | E049 | 6_EnhG     | 54  | 1.3197 | 0.0058 | 0.0202 |
| 0.01     | E036 | 11_BivFlnk | 109 | 1.3194 | 0.0011 | 0.0023 |
| 0.01     | E071 | 12_EnhBiv  | 113 | 1.3187 | 0.0012 | 0.0020 |
| 1.00E-04 | E121 | 6_EnhG     | 3   | 1.3179 | 0.0029 | 0.1957 |
| 0.01     | E119 | 10_TssBiv  | 18  | 1.3156 | 0.0002 | 0.1005 |
| 1.00E-04 | E070 | 10_TssBiv  | 3   | 1.3145 | 0.0029 | 0.1969 |
| 1.00E-04 | E053 | 12_EnhBiv  | 3   | 1.3141 | 0.0029 | 0.1970 |
| 0.01     | E105 | 3_TxFlnk   | 28  | 1.3131 | 0.0003 | 0.0653 |
| 0.01     | E043 | 11_BivFlnk | 102 | 1.3128 | 0.0011 | 0.0035 |
| 1.00E-05 | E084 | 7_Enh      | 4   | 1.3128 | 0.0421 | 0.1900 |
| 1.00E-04 | E094 | 7_Enh      | 22  | 1.3120 | 0.0211 | 0.0839 |
| 0.01     | E039 | 3_TxFlnk   | 209 | 1.3102 | 0.0022 | 0.0001 |
| 1.00E-04 | E107 | 7_Enh      | 44  | 1.3079 | 0.0422 | 0.0328 |
| 1.00E-04 | E045 | 7_Enh      | 18  | 1.3069 | 0.0173 | 0.1037 |
| 0.01     | E122 | 3_TxFlnk   | 47  | 1.3063 | 0.0005 | 0.0317 |

|          |      |            |     |        |        |        |
|----------|------|------------|-----|--------|--------|--------|
| 0.01     | E005 | 10_TssBiv  | 42  | 1.3063 | 0.0004 | 0.0386 |
| 0.001    | E027 | 11_BivFlnk | 7   | 1.3054 | 0.0008 | 0.1738 |
| 1.00E-04 | E069 | 2_TssAFlnk | 6   | 1.3050 | 0.0058 | 0.1813 |
| 1.00E-05 | E118 | 7_Enh      | 5   | 1.3028 | 0.0526 | 0.1864 |
| 0.001    | E099 | 12_EnhBiv  | 13  | 1.3023 | 0.0014 | 0.1342 |
| 0.001    | E108 | 10_TssBiv  | 9   | 1.3017 | 0.0010 | 0.1608 |
| 0.01     | E074 | 12_EnhBiv  | 49  | 1.3009 | 0.0005 | 0.0311 |
| 1.00E-04 | E065 | 1_TssA     | 12  | 1.3003 | 0.0115 | 0.1405 |
| 1.00E-04 | E108 | 2_TssAFlnk | 11  | 1.2999 | 0.0105 | 0.1473 |
| 0.001    | E014 | 11_BivFlnk | 13  | 1.2980 | 0.0014 | 0.1365 |
| 0.01     | E045 | 11_BivFlnk | 59  | 1.2979 | 0.0006 | 0.0222 |
| 1.00E-04 | E063 | 7_Enh      | 47  | 1.2976 | 0.0451 | 0.0323 |
| 0.01     | E044 | 11_BivFlnk | 151 | 1.2963 | 0.0016 | 0.0009 |
| 0.001    | E052 | 11_BivFlnk | 6   | 1.2951 | 0.0006 | 0.1863 |
| 1.00E-04 | E075 | 2_TssAFlnk | 5   | 1.2949 | 0.0048 | 0.1933 |
| 1.00E-04 | E006 | 12_EnhBiv  | 3   | 1.2931 | 0.0029 | 0.2046 |
| 0.01     | E079 | 3_TxFlnk   | 25  | 1.2922 | 0.0003 | 0.0854 |
| 0.01     | E029 | 11_BivFlnk | 102 | 1.2918 | 0.0011 | 0.0054 |
| 1.00E-04 | E121 | 7_Enh      | 41  | 1.2916 | 0.0393 | 0.0438 |
| 1.00E-04 | E003 | 10_TssBiv  | 3   | 1.2915 | 0.0029 | 0.2052 |
| 0.01     | E075 | 10_TssBiv  | 102 | 1.2911 | 0.0011 | 0.0055 |
| 1.00E-04 | E107 | 2_TssAFlnk | 11  | 1.2893 | 0.0105 | 0.1532 |
| 0.01     | E045 | 3_TxFlnk   | 28  | 1.2892 | 0.0003 | 0.0775 |
| 0.001    | E126 | 10_TssBiv  | 5   | 1.2887 | 0.0005 | 0.1964 |
| 0.001    | E101 | 6_EnhG     | 22  | 1.2851 | 0.0024 | 0.1003 |
| 0.01     | E023 | 11_BivFlnk | 24  | 1.2845 | 0.0003 | 0.0933 |
| 0.001    | E025 | 10_TssBiv  | 12  | 1.2839 | 0.0013 | 0.1507 |
| 0.001    | E008 | 2_TssAFlnk | 7   | 1.2823 | 0.0008 | 0.1854 |
| 0.01     | E122 | 12_EnhBiv  | 85  | 1.2814 | 0.0009 | 0.0115 |
| 0.01     | E027 | 11_BivFlnk | 70  | 1.2803 | 0.0007 | 0.0192 |
| 0.01     | E038 | 11_BivFlnk | 23  | 1.2801 | 0.0002 | 0.0997 |
| 0.01     | E105 | 2_TssAFlnk | 336 | 1.2758 | 0.0035 | 0.0000 |
| 0.01     | E037 | 3_TxFlnk   | 20  | 1.2755 | 0.0002 | 0.1147 |
| 0.01     | E096 | 2_TssAFlnk | 162 | 1.2751 | 0.0017 | 0.0012 |
| 0.001    | E011 | 11_BivFlnk | 5   | 1.2732 | 0.0005 | 0.2036 |
| 0.01     | E121 | 10_TssBiv  | 61  | 1.2727 | 0.0006 | 0.0287 |
| 0.001    | E063 | 11_BivFlnk | 14  | 1.2710 | 0.0015 | 0.1469 |
| 0.01     | E052 | 11_BivFlnk | 60  | 1.2703 | 0.0006 | 0.0305 |
| 0.01     | E035 | 10_TssBiv  | 26  | 1.2702 | 0.0003 | 0.0951 |
| 1.00E-04 | E107 | 12_EnhBiv  | 5   | 1.2690 | 0.0048 | 0.2053 |
| 0.001    | E059 | 11_BivFlnk | 13  | 1.2667 | 0.0014 | 0.1553 |
| 0.001    | E110 | 10_TssBiv  | 4   | 1.2667 | 0.0004 | 0.2119 |
| 0.01     | E007 | 11_BivFlnk | 16  | 1.2664 | 0.0002 | 0.1393 |

|          |      |            |     |        |        |        |
|----------|------|------------|-----|--------|--------|--------|
| 0.01     | E108 | 3_TxFlnk   | 59  | 1.2663 | 0.0006 | 0.0332 |
| 0.01     | E039 | 11_BivFlnk | 71  | 1.2660 | 0.0007 | 0.0230 |
| 0.01     | E013 | 11_BivFlnk | 20  | 1.2651 | 0.0002 | 0.1214 |
| 0.001    | E031 | 7_Enh      | 272 | 1.2649 | 0.0292 | 0.0001 |
| 0.01     | E079 | 10_TssBiv  | 37  | 1.2647 | 0.0004 | 0.0681 |
| 0.001    | E078 | 2_TssAFlnk | 40  | 1.2641 | 0.0043 | 0.0618 |
| 0.001    | E081 | 2_TssAFlnk | 31  | 1.2625 | 0.0033 | 0.0844 |
| 0.001    | E046 | 2_TssAFlnk | 52  | 1.2609 | 0.0056 | 0.0436 |
| 0.01     | E119 | 3_TxFlnk   | 52  | 1.2603 | 0.0005 | 0.0442 |
| 1.00E-04 | E061 | 2_TssAFlnk | 5   | 1.2578 | 0.0048 | 0.2107 |
| 0.001    | E092 | 2_TssAFlnk | 25  | 1.2573 | 0.0027 | 0.1069 |
| 0.01     | E087 | 3_TxFlnk   | 7   | 1.2570 | 0.0001 | 0.1991 |
| 0.001    | E035 | 11_BivFlnk | 7   | 1.2565 | 0.0008 | 0.1993 |
| 0.01     | E047 | 12_EnhBiv  | 121 | 1.2542 | 0.0013 | 0.0068 |
| 1.00E-04 | E033 | 2_TssAFlnk | 9   | 1.2515 | 0.0086 | 0.1888 |
| 0.001    | E111 | 6_EnhG     | 47  | 1.2514 | 0.0050 | 0.0563 |
| 0.01     | E040 | 3_TxFlnk   | 21  | 1.2514 | 0.0002 | 0.1266 |
| 0.01     | E073 | 11_BivFlnk | 35  | 1.2512 | 0.0004 | 0.0813 |
| 0.01     | E117 | 6_EnhG     | 244 | 1.2508 | 0.0026 | 0.0003 |
| 0.001    | E049 | 3_TxFlnk   | 7   | 1.2487 | 0.0008 | 0.2037 |
| 1.00E-04 | E108 | 7_Enh      | 45  | 1.2482 | 0.0431 | 0.0587 |
| 0.01     | E069 | 11_BivFlnk | 53  | 1.2471 | 0.0006 | 0.0498 |
| 0.001    | E052 | 6_EnhG     | 45  | 1.2464 | 0.0048 | 0.0627 |
| 0.01     | E074 | 3_TxFlnk   | 16  | 1.2464 | 0.0002 | 0.1530 |
| 1.00E-04 | E059 | 7_Enh      | 24  | 1.2452 | 0.0230 | 0.1172 |
| 0.01     | E042 | 11_BivFlnk | 44  | 1.2452 | 0.0005 | 0.0657 |
| 1.00E-04 | E085 | 6_EnhG     | 11  | 1.2445 | 0.0105 | 0.1808 |
| 0.001    | E067 | 2_TssAFlnk | 37  | 1.2439 | 0.0040 | 0.0811 |
| 0.001    | E092 | 11_BivFlnk | 19  | 1.2428 | 0.0020 | 0.1413 |
| 0.001    | E099 | 11_BivFlnk | 3   | 1.2415 | 0.0003 | 0.2247 |
| 0.01     | E106 | 3_TxFlnk   | 10  | 1.2392 | 0.0001 | 0.1911 |
| 0.001    | E073 | 2_TssAFlnk | 38  | 1.2385 | 0.0041 | 0.0825 |
| 0.01     | E002 | 2_TssAFlnk | 19  | 1.2379 | 0.0002 | 0.1451 |
| 0.01     | E051 | 11_BivFlnk | 282 | 1.2363 | 0.0030 | 0.0002 |
| 0.01     | E045 | 12_EnhBiv  | 82  | 1.2328 | 0.0009 | 0.0281 |
| 1.00E-04 | E055 | 2_TssAFlnk | 9   | 1.2325 | 0.0086 | 0.2008 |
| 0.01     | E024 | 11_BivFlnk | 118 | 1.2324 | 0.0012 | 0.0120 |
| 0.001    | E089 | 10_TssBiv  | 7   | 1.2317 | 0.0008 | 0.2136 |
| 0.001    | E084 | 6_EnhG     | 44  | 1.2315 | 0.0047 | 0.0746 |
| 0.01     | E098 | 2_TssAFlnk | 336 | 1.2306 | 0.0035 | 0.0001 |
| 0.001    | E059 | 6_EnhG     | 49  | 1.2304 | 0.0053 | 0.0661 |
| 1.00E-04 | E082 | 2_TssAFlnk | 5   | 1.2294 | 0.0048 | 0.2252 |
| 0.001    | E022 | 11_BivFlnk | 17  | 1.2291 | 0.0018 | 0.1608 |

|          |      |            |     |        |        |        |
|----------|------|------------|-----|--------|--------|--------|
| 0.001    | E100 | 2_TssAFlnk | 15  | 1.2285 | 0.0016 | 0.1711 |
| 1.00E-04 | E066 | 2_TssAFlnk | 9   | 1.2273 | 0.0086 | 0.2042 |
| 0.001    | E126 | 12_EnhBiv  | 6   | 1.2266 | 0.0006 | 0.2221 |
| 0.01     | E125 | 11_BivFlnk | 53  | 1.2258 | 0.0006 | 0.0631 |
| 1.00E-04 | E036 | 7_Enh      | 41  | 1.2240 | 0.0393 | 0.0834 |
| 0.01     | E112 | 12_EnhBiv  | 63  | 1.2233 | 0.0007 | 0.0509 |
| 0.01     | E093 | 11_BivFlnk | 129 | 1.2225 | 0.0014 | 0.0116 |
| 1.00E-05 | E127 | 7_Enh      | 4   | 1.2225 | 0.0421 | 0.2300 |
| 0.01     | E056 | 3_TxFlnk   | 488 | 1.2213 | 0.0051 | 0.0000 |
| 0.001    | E032 | 12_EnhBiv  | 31  | 1.2212 | 0.0033 | 0.1145 |
| 0.01     | E082 | 11_BivFlnk | 95  | 1.2210 | 0.0010 | 0.0252 |
| 0.01     | E128 | 10_TssBiv  | 64  | 1.2205 | 0.0007 | 0.0516 |
| 0.01     | E029 | 10_TssBiv  | 19  | 1.2200 | 0.0002 | 0.1591 |
| 1.00E-04 | E050 | 7_Enh      | 47  | 1.2200 | 0.0451 | 0.0739 |
| 0.001    | E011 | 10_TssBiv  | 19  | 1.2192 | 0.0020 | 0.1597 |
| 0.01     | E076 | 11_BivFlnk | 31  | 1.2191 | 0.0003 | 0.1165 |
| 1.00E-04 | E069 | 6_EnhG     | 3   | 1.2188 | 0.0029 | 0.2341 |
| 1.00E-05 | E104 | 7_Enh      | 3   | 1.2178 | 0.0316 | 0.2331 |
| 0.01     | E117 | 3_TxFlnk   | 83  | 1.2177 | 0.0009 | 0.0348 |
| 0.01     | E038 | 12_EnhBiv  | 73  | 1.2176 | 0.0008 | 0.0436 |
| 0.01     | E125 | 10_TssBiv  | 60  | 1.2174 | 0.0006 | 0.0588 |
| 0.01     | E050 | 11_BivFlnk | 197 | 1.2173 | 0.0021 | 0.0032 |
| 0.01     | E069 | 10_TssBiv  | 122 | 1.2166 | 0.0013 | 0.0154 |
| 0.01     | E021 | 3_TxFlnk   | 10  | 1.2150 | 0.0001 | 0.2076 |
| 0.001    | E058 | 11_BivFlnk | 17  | 1.2127 | 0.0018 | 0.1740 |
| 0.01     | E104 | 3_TxFlnk   | 142 | 1.2116 | 0.0015 | 0.0114 |
| 1.00E-04 | E090 | 7_Enh      | 53  | 1.2105 | 0.0508 | 0.0702 |
| 0.01     | E031 | 10_TssBiv  | 27  | 1.2080 | 0.0003 | 0.1389 |
| 0.01     | E050 | 10_TssBiv  | 11  | 1.2079 | 0.0001 | 0.2075 |
| 0.01     | E100 | 6_EnhG     | 52  | 1.2078 | 0.0005 | 0.0784 |
| 0.001    | E124 | 6_EnhG     | 34  | 1.2069 | 0.0036 | 0.1183 |
| 0.01     | E029 | 12_EnhBiv  | 283 | 1.2065 | 0.0030 | 0.0009 |
| 1.00E-04 | E031 | 7_Enh      | 29  | 1.2047 | 0.0278 | 0.1328 |
| 0.001    | E030 | 12_EnhBiv  | 14  | 1.2044 | 0.0015 | 0.1950 |
| 0.01     | E058 | 11_BivFlnk | 172 | 1.2034 | 0.0018 | 0.0080 |
| 1.00E-04 | E014 | 1_TssA     | 10  | 1.2031 | 0.0096 | 0.2155 |
| 0.001    | E076 | 11_BivFlnk | 3   | 1.2028 | 0.0003 | 0.2411 |
| 1.00E-04 | E081 | 7_Enh      | 40  | 1.2021 | 0.0384 | 0.1041 |
| 1.00E-04 | E126 | 7_Enh      | 50  | 1.2018 | 0.0479 | 0.0827 |
| 0.01     | E127 | 11_BivFlnk | 74  | 1.2017 | 0.0008 | 0.0532 |
| 0.01     | E092 | 3_TxFlnk   | 51  | 1.2006 | 0.0005 | 0.0862 |
| 0.01     | E067 | 12_EnhBiv  | 29  | 1.2005 | 0.0003 | 0.1393 |
| 0.01     | E044 | 6_EnhG     | 454 | 1.1999 | 0.0048 | 0.0001 |

|          |      |            |     |        |        |        |
|----------|------|------------|-----|--------|--------|--------|
| 0.001    | E100 | 11_BivFlnk | 4   | 1.1991 | 0.0004 | 0.2440 |
| 1.00E-04 | E096 | 6_EnhG     | 5   | 1.1989 | 0.0048 | 0.2418 |
| 0.01     | E088 | 11_BivFlnk | 57  | 1.1984 | 0.0006 | 0.0781 |
| 0.001    | E011 | 3_TxFlnk   | 12  | 1.1982 | 0.0013 | 0.2098 |
| 0.01     | E124 | 12_EnhBiv  | 172 | 1.1969 | 0.0018 | 0.0096 |
| 1.00E-04 | E100 | 7_Enh      | 27  | 1.1960 | 0.0259 | 0.1476 |
| 0.01     | E068 | 11_BivFlnk | 30  | 1.1954 | 0.0003 | 0.1411 |
| 0.01     | E072 | 10_TssBiv  | 96  | 1.1953 | 0.0010 | 0.0385 |
| 0.001    | E068 | 10_TssBiv  | 7   | 1.1951 | 0.0008 | 0.2366 |
| 0.01     | E049 | 11_BivFlnk | 68  | 1.1949 | 0.0007 | 0.0655 |
| 0.01     | E046 | 10_TssBiv  | 10  | 1.1948 | 0.0001 | 0.2224 |
| 1.00E-05 | E039 | 7_Enh      | 3   | 1.1948 | 0.0316 | 0.2433 |
| 0.01     | E115 | 10_TssBiv  | 8   | 1.1937 | 0.0001 | 0.2329 |
| 0.01     | E092 | 11_BivFlnk | 186 | 1.1933 | 0.0020 | 0.0083 |
| 0.01     | E110 | 11_BivFlnk | 36  | 1.1931 | 0.0004 | 0.1263 |
| 0.01     | E118 | 3_TxFlnk   | 67  | 1.1930 | 0.0007 | 0.0683 |
| 1.00E-04 | E071 | 2_TssAFlnk | 7   | 1.1924 | 0.0067 | 0.2380 |
| 0.01     | E075 | 3_TxFlnk   | 28  | 1.1923 | 0.0003 | 0.1504 |
| 0.01     | E110 | 2_TssAFlnk | 216 | 1.1921 | 0.0023 | 0.0053 |
| 0.01     | E080 | 11_BivFlnk | 241 | 1.1917 | 0.0025 | 0.0035 |
| 0.001    | E038 | 12_EnhBiv  | 7   | 1.1904 | 0.0008 | 0.2397 |
| 1.00E-04 | E027 | 2_TssAFlnk | 5   | 1.1898 | 0.0048 | 0.2470 |
| 0.01     | E077 | 11_BivFlnk | 90  | 1.1896 | 0.0009 | 0.0470 |
| 0.001    | E030 | 11_BivFlnk | 10  | 1.1882 | 0.0011 | 0.2274 |
| 1.00E-05 | E027 | 7_Enh      | 5   | 1.1881 | 0.0526 | 0.2453 |
| 0.001    | E095 | 11_BivFlnk | 3   | 1.1879 | 0.0003 | 0.2479 |
| 0.001    | E112 | 12_EnhBiv  | 6   | 1.1879 | 0.0006 | 0.2453 |
| 0.01     | E112 | 10_TssBiv  | 171 | 1.1876 | 0.0018 | 0.0125 |
| 0.01     | E129 | 12_EnhBiv  | 65  | 1.1870 | 0.0007 | 0.0764 |
| 0.01     | E088 | 6_EnhG     | 227 | 1.1862 | 0.0024 | 0.0054 |
| 1.00E-04 | E035 | 7_Enh      | 34  | 1.1857 | 0.0326 | 0.1360 |
| 0.01     | E062 | 11_BivFlnk | 85  | 1.1857 | 0.0009 | 0.0545 |
| 1.00E-04 | E093 | 12_EnhBiv  | 3   | 1.1845 | 0.0029 | 0.2493 |
| 0.01     | E103 | 10_TssBiv  | 128 | 1.1839 | 0.0013 | 0.0274 |
| 1.00E-04 | E126 | 1_TssA     | 10  | 1.1828 | 0.0096 | 0.2309 |
| 0.01     | E105 | 10_TssBiv  | 33  | 1.1811 | 0.0003 | 0.1468 |
| 0.01     | E011 | 6_EnhG     | 261 | 1.1802 | 0.0027 | 0.0040 |
| 1.00E-04 | E005 | 1_TssA     | 6   | 1.1800 | 0.0058 | 0.2499 |
| 1.00E-04 | E079 | 7_Enh      | 22  | 1.1793 | 0.0211 | 0.1822 |
| 0.01     | E007 | 3_TxFlnk   | 6   | 1.1793 | 0.0001 | 0.2508 |
| 0.01     | E072 | 3_TxFlnk   | 21  | 1.1786 | 0.0002 | 0.1886 |
| 1.00E-04 | E018 | 10_TssBiv  | 5   | 1.1784 | 0.0048 | 0.2536 |
| 0.001    | E048 | 7_Enh      | 254 | 1.1772 | 0.0273 | 0.0046 |

|          |      |            |     |        |        |        |
|----------|------|------------|-----|--------|--------|--------|
| 0.001    | E034 | 11_BivFlnk | 16  | 1.1766 | 0.0017 | 0.2102 |
| 0.01     | E084 | 11_BivFlnk | 88  | 1.1760 | 0.0009 | 0.0600 |
| 0.001    | E017 | 12_EnhBiv  | 24  | 1.1759 | 0.0026 | 0.1803 |
| 1.00E-04 | E037 | 2_TssAFlnk | 6   | 1.1755 | 0.0058 | 0.2529 |
| 0.01     | E109 | 12_EnhBiv  | 53  | 1.1753 | 0.0006 | 0.1075 |
| 0.001    | E056 | 3_TxFlnk   | 46  | 1.1738 | 0.0049 | 0.1226 |
| 0.01     | E012 | 11_BivFlnk | 103 | 1.1737 | 0.0011 | 0.0493 |
| 0.001    | E029 | 12_EnhBiv  | 27  | 1.1736 | 0.0029 | 0.1727 |
| 1.00E-04 | E088 | 7_Enh      | 46  | 1.1735 | 0.0441 | 0.1190 |
| 0.01     | E085 | 3_TxFlnk   | 105 | 1.1732 | 0.0011 | 0.0482 |
| 1.00E-04 | E112 | 2_TssAFlnk | 4   | 1.1722 | 0.0038 | 0.2579 |
| 0.01     | E111 | 11_BivFlnk | 150 | 1.1717 | 0.0016 | 0.0257 |
| 0.001    | E032 | 2_TssAFlnk | 48  | 1.1713 | 0.0052 | 0.1211 |
| 0.01     | E097 | 2_TssAFlnk | 187 | 1.1710 | 0.0020 | 0.0156 |
| 0.001    | E086 | 7_Enh      | 180 | 1.1705 | 0.0193 | 0.0167 |
| 0.01     | E017 | 11_BivFlnk | 71  | 1.1692 | 0.0007 | 0.0859 |
| 1.00E-04 | E127 | 7_Enh      | 42  | 1.1692 | 0.0403 | 0.1331 |
| 1.00E-04 | E068 | 2_TssAFlnk | 6   | 1.1686 | 0.0058 | 0.2574 |
| 0.01     | E095 | 3_TxFlnk   | 17  | 1.1686 | 0.0002 | 0.2140 |
| 0.01     | E003 | 10_TssBiv  | 247 | 1.1676 | 0.0026 | 0.0078 |
| 0.01     | E020 | 12_EnhBiv  | 220 | 1.1673 | 0.0023 | 0.0112 |
| 1.00E-04 | E046 | 6_EnhG     | 7   | 1.1671 | 0.0067 | 0.2553 |
| 0.01     | E078 | 11_BivFlnk | 92  | 1.1663 | 0.0010 | 0.0654 |
| 0.01     | E124 | 11_BivFlnk | 211 | 1.1659 | 0.0022 | 0.0131 |
| 0.01     | E026 | 6_EnhG     | 369 | 1.1659 | 0.0039 | 0.0018 |
| 0.01     | E062 | 10_TssBiv  | 80  | 1.1658 | 0.0008 | 0.0785 |
| 0.001    | E022 | 6_EnhG     | 90  | 1.1651 | 0.0097 | 0.0678 |
| 1.00E-05 | E001 | 7_Enh      | 4   | 1.1649 | 0.0421 | 0.2601 |
| 1.00E-04 | E006 | 1_TssA     | 6   | 1.1647 | 0.0058 | 0.2599 |
| 0.01     | E073 | 12_EnhBiv  | 54  | 1.1641 | 0.0006 | 0.1185 |
| 0.001    | E046 | 12_EnhBiv  | 27  | 1.1639 | 0.0029 | 0.1835 |
| 1.00E-05 | E068 | 7_Enh      | 3   | 1.1625 | 0.0316 | 0.2585 |
| 0.01     | E070 | 3_TxFlnk   | 31  | 1.1624 | 0.0003 | 0.1734 |
| 0.001    | E030 | 2_TssAFlnk | 99  | 1.1621 | 0.0106 | 0.0625 |
| 0.01     | E004 | 10_TssBiv  | 124 | 1.1617 | 0.0013 | 0.0454 |
| 0.001    | E075 | 10_TssBiv  | 9   | 1.1615 | 0.0010 | 0.2526 |
| 0.01     | E092 | 10_TssBiv  | 160 | 1.1605 | 0.0017 | 0.0292 |
| 0.01     | E057 | 11_BivFlnk | 138 | 1.1600 | 0.0015 | 0.0391 |
| 0.01     | E090 | 10_TssBiv  | 79  | 1.1597 | 0.0008 | 0.0864 |
| 0.001    | E093 | 11_BivFlnk | 12  | 1.1595 | 0.0013 | 0.2426 |
| 0.01     | E042 | 3_TxFlnk   | 361 | 1.1582 | 0.0038 | 0.0028 |
| 0.01     | E017 | 10_TssBiv  | 67  | 1.1569 | 0.0007 | 0.1058 |
| 0.01     | E007 | 2_TssAFlnk | 79  | 1.1566 | 0.0008 | 0.0900 |



|          |      |            |     |        |        |        |
|----------|------|------------|-----|--------|--------|--------|
| 0.001    | E022 | 10_TssBiv  | 4   | 1.1565 | 0.0004 | 0.2667 |
| 0.01     | E099 | 6_EnhG     | 91  | 1.1564 | 0.0010 | 0.0769 |
| 0.01     | E089 | 10_TssBiv  | 67  | 1.1563 | 0.0007 | 0.1066 |
| 1.00E-04 | E088 | 1_TssA     | 7   | 1.1551 | 0.0067 | 0.2640 |
| 1.00E-05 | E061 | 7_Enh      | 4   | 1.1547 | 0.0421 | 0.2659 |
| 0.01     | E025 | 10_TssBiv  | 110 | 1.1544 | 0.0012 | 0.0622 |
| 0.001    | E056 | 6_EnhG     | 76  | 1.1543 | 0.0082 | 0.0959 |
| 0.01     | E071 | 11_BivFlnk | 95  | 1.1540 | 0.0010 | 0.0757 |
| 0.001    | E074 | 2_TssAFlnk | 39  | 1.1528 | 0.0042 | 0.1639 |
| 0.01     | E001 | 10_TssBiv  | 412 | 1.1519 | 0.0043 | 0.0022 |
| 1.00E-04 | E065 | 7_Enh      | 12  | 1.1511 | 0.0115 | 0.2495 |
| 0.01     | E106 | 2_TssAFlnk | 79  | 1.1509 | 0.0008 | 0.0971 |
| 1.00E-04 | E012 | 10_TssBiv  | 3   | 1.1506 | 0.0029 | 0.2655 |
| 1.00E-04 | E031 | 6_EnhG     | 4   | 1.1501 | 0.0038 | 0.2702 |
| 0.001    | E104 | 2_TssAFlnk | 17  | 1.1497 | 0.0018 | 0.2332 |
| 0.01     | E108 | 6_EnhG     | 480 | 1.1492 | 0.0051 | 0.0013 |
| 0.001    | E112 | 2_TssAFlnk | 35  | 1.1482 | 0.0038 | 0.1797 |
| 0.01     | E091 | 3_TxFlnk   | 20  | 1.1465 | 0.0002 | 0.2264 |
| 0.001    | E053 | 2_TssAFlnk | 53  | 1.1463 | 0.0057 | 0.1426 |
| 0.001    | E032 | 7_Enh      | 322 | 1.1447 | 0.0346 | 0.0072 |
| 0.001    | E071 | 2_TssAFlnk | 60  | 1.1441 | 0.0064 | 0.1332 |
| 0.001    | E113 | 7_Enh      | 267 | 1.1440 | 0.0287 | 0.0132 |
| 0.01     | E016 | 3_TxFlnk   | 61  | 1.1432 | 0.0006 | 0.1334 |
| 0.01     | E053 | 1_TssA     | 484 | 1.1431 | 0.0051 | 0.0018 |
| 0.01     | E126 | 12_EnhBiv  | 57  | 1.1429 | 0.0006 | 0.1407 |
| 0.001    | E126 | 6_EnhG     | 35  | 1.1428 | 0.0038 | 0.1868 |
| 0.01     | E021 | 10_TssBiv  | 133 | 1.1423 | 0.0014 | 0.0592 |
| 0.001    | E031 | 12_EnhBiv  | 10  | 1.1421 | 0.0011 | 0.2654 |
| 0.01     | E094 | 2_TssAFlnk | 113 | 1.1406 | 0.0012 | 0.0759 |
| 0.01     | E040 | 12_EnhBiv  | 153 | 1.1402 | 0.0016 | 0.0500 |
| 0.001    | E008 | 10_TssBiv  | 19  | 1.1395 | 0.0020 | 0.2375 |
| 1.00E-04 | E039 | 2_TssAFlnk | 8   | 1.1385 | 0.0077 | 0.2740 |
| 0.01     | E030 | 10_TssBiv  | 27  | 1.1384 | 0.0003 | 0.2146 |
| 0.01     | E019 | 10_TssBiv  | 353 | 1.1381 | 0.0037 | 0.0078 |
| 1.00E-04 | E051 | 7_Enh      | 41  | 1.1380 | 0.0393 | 0.1756 |
| 0.001    | E067 | 10_TssBiv  | 6   | 1.1380 | 0.0006 | 0.2786 |
| 0.01     | E075 | 11_BivFlnk | 115 | 1.1376 | 0.0012 | 0.0782 |
| 1.00E-04 | E054 | 2_TssAFlnk | 7   | 1.1371 | 0.0067 | 0.2774 |
| 1.00E-04 | E125 | 2_TssAFlnk | 7   | 1.1361 | 0.0067 | 0.2782 |
| 0.01     | E070 | 11_BivFlnk | 164 | 1.1354 | 0.0017 | 0.0498 |
| 0.001    | E006 | 7_Enh      | 292 | 1.1346 | 0.0313 | 0.0145 |
| 1.00E-04 | E069 | 7_Enh      | 32  | 1.1337 | 0.0307 | 0.2044 |
| 1.00E-04 | E015 | 10_TssBiv  | 4   | 1.1333 | 0.0038 | 0.2800 |

|          |      |            |      |        |        |        |
|----------|------|------------|------|--------|--------|--------|
| 0.01     | E113 | 12_EnhBiv  | 98   | 1.1302 | 0.0010 | 0.1043 |
| 0.001    | E037 | 12_EnhBiv  | 7    | 1.1292 | 0.0008 | 0.2838 |
| 0.01     | E089 | 1_TssA     | 550  | 1.1286 | 0.0058 | 0.0024 |
| 0.001    | E075 | 6_EnhG     | 13   | 1.1283 | 0.0014 | 0.2690 |
| 0.01     | E062 | 12_EnhBiv  | 69   | 1.1282 | 0.0007 | 0.1435 |
| 0.001    | E059 | 10_TssBiv  | 7    | 1.1275 | 0.0008 | 0.2851 |
| 0.001    | E101 | 12_EnhBiv  | 7    | 1.1271 | 0.0008 | 0.2854 |
| 0.01     | E088 | 1_TssA     | 622  | 1.1269 | 0.0065 | 0.0015 |
| 0.01     | E100 | 10_TssBiv  | 92   | 1.1267 | 0.0010 | 0.1162 |
| 0.01     | E052 | 10_TssBiv  | 54   | 1.1262 | 0.0006 | 0.1712 |
| 0.001    | E129 | 11_BivFlnk | 4    | 1.1255 | 0.0004 | 0.2848 |
| 0.01     | E114 | 10_TssBiv  | 78   | 1.1254 | 0.0008 | 0.1354 |
| 0.01     | E129 | 3_TxFlnk   | 68   | 1.1250 | 0.0007 | 0.1502 |
| 0.001    | E041 | 12_EnhBiv  | 18   | 1.1247 | 0.0019 | 0.2579 |
| 0.001    | E030 | 7_Enh      | 273  | 1.1246 | 0.0293 | 0.0244 |
| 1.00E-04 | E039 | 7_Enh      | 31   | 1.1246 | 0.0297 | 0.2199 |
| 0.01     | E056 | 11_BivFlnk | 215  | 1.1242 | 0.0023 | 0.0416 |
| 0.001    | E105 | 6_EnhG     | 39   | 1.1241 | 0.0042 | 0.2041 |
| 0.01     | E029 | 6_EnhG     | 352  | 1.1239 | 0.0037 | 0.0143 |
| 0.001    | E034 | 7_Enh      | 243  | 1.1239 | 0.0261 | 0.0320 |
| 0.001    | E013 | 10_TssBiv  | 12   | 1.1236 | 0.0013 | 0.2767 |
| 0.01     | E097 | 6_EnhG     | 139  | 1.1234 | 0.0015 | 0.0801 |
| 0.01     | E086 | 2_TssAFlnk | 180  | 1.1232 | 0.0019 | 0.0569 |
| 0.001    | E041 | 2_TssAFlnk | 86   | 1.1224 | 0.0092 | 0.1294 |
| 0.001    | E026 | 3_TxFlnk   | 8    | 1.1222 | 0.0009 | 0.2878 |
| 0.01     | E109 | 10_TssBiv  | 43   | 1.1222 | 0.0005 | 0.1989 |
| 1.00E-04 | E089 | 1_TssA     | 6    | 1.1213 | 0.0058 | 0.2905 |
| 0.01     | E084 | 10_TssBiv  | 142  | 1.1213 | 0.0015 | 0.0812 |
| 0.01     | E108 | 11_BivFlnk | 120  | 1.1210 | 0.0013 | 0.0984 |
| 0.001    | E101 | 7_Enh      | 149  | 1.1208 | 0.0160 | 0.0761 |
| 0.001    | E002 | 10_TssBiv  | 15   | 1.1208 | 0.0016 | 0.2712 |
| 0.01     | E018 | 1_TssA     | 955  | 1.1206 | 0.0101 | 0.0002 |
| 0.01     | E073 | 3_TxFlnk   | 18   | 1.1204 | 0.0002 | 0.2631 |
| 0.001    | E043 | 7_Enh      | 287  | 1.1202 | 0.0308 | 0.0253 |
| 0.001    | E080 | 6_EnhG     | 77   | 1.1196 | 0.0083 | 0.1459 |
| 0.01     | E093 | 3_TxFlnk   | 57   | 1.1191 | 0.0006 | 0.1776 |
| 1.00E-04 | E002 | 1_TssA     | 9    | 1.1185 | 0.0086 | 0.2887 |
| 0.01     | E101 | 1_TssA     | 1067 | 1.1183 | 0.0112 | 0.0001 |
| 0.001    | E099 | 2_TssAFlnk | 13   | 1.1179 | 0.0014 | 0.2798 |
| 0.001    | E025 | 12_EnhBiv  | 14   | 1.1167 | 0.0015 | 0.2785 |
| 0.01     | E015 | 1_TssA     | 924  | 1.1165 | 0.0097 | 0.0004 |
| 0.001    | E111 | 11_BivFlnk | 14   | 1.1150 | 0.0015 | 0.2804 |
| 0.01     | E046 | 3_TxFlnk   | 34   | 1.1145 | 0.0004 | 0.2303 |

|          |      |            |     |        |        |        |
|----------|------|------------|-----|--------|--------|--------|
| 1.00E-04 | E082 | 7_Enh      | 19  | 1.1142 | 0.0182 | 0.2667 |
| 0.01     | E008 | 2_TssAFlnk | 62  | 1.1140 | 0.0007 | 0.1784 |
| 0.001    | E014 | 12_EnhBiv  | 22  | 1.1137 | 0.0024 | 0.2605 |
| 0.01     | E037 | 1_TssA     | 525 | 1.1137 | 0.0055 | 0.0069 |
| 0.01     | E102 | 11_BivFlnk | 45  | 1.1123 | 0.0005 | 0.2110 |
| 0.001    | E001 | 10_TssBiv  | 39  | 1.1117 | 0.0042 | 0.2236 |
| 1.00E-04 | E032 | 7_Enh      | 35  | 1.1114 | 0.0336 | 0.2299 |
| 0.01     | E030 | 6_EnhG     | 300 | 1.1104 | 0.0032 | 0.0340 |
| 1.00E-04 | E066 | 1_TssA     | 6   | 1.1090 | 0.0058 | 0.2997 |
| 0.001    | E039 | 7_Enh      | 273 | 1.1086 | 0.0293 | 0.0409 |
| 1.00E-04 | E019 | 1_TssA     | 8   | 1.1082 | 0.0077 | 0.2995 |
| 0.01     | E090 | 11_BivFlnk | 205 | 1.1078 | 0.0022 | 0.0680 |
| 0.01     | E118 | 10_TssBiv  | 373 | 1.1078 | 0.0039 | 0.0237 |
| 0.01     | E044 | 1_TssA     | 410 | 1.1078 | 0.0043 | 0.0190 |
| 0.01     | E080 | 1_TssA     | 467 | 1.1072 | 0.0049 | 0.0139 |
| 0.01     | E010 | 1_TssA     | 564 | 1.1072 | 0.0059 | 0.0079 |
| 0.001    | E024 | 10_TssBiv  | 6   | 1.1066 | 0.0006 | 0.3018 |
| 0.01     | E016 | 10_TssBiv  | 408 | 1.1062 | 0.0043 | 0.0205 |
| 1.00E-04 | E025 | 1_TssA     | 11  | 1.1056 | 0.0105 | 0.2969 |
| 0.01     | E027 | 2_TssAFlnk | 423 | 1.1052 | 0.0045 | 0.0196 |
| 0.01     | E068 | 10_TssBiv  | 66  | 1.1052 | 0.0007 | 0.1886 |
| 0.01     | E104 | 12_EnhBiv  | 3   | 1.1050 | 0.0000 | 0.2892 |
| 1.00E-04 | E047 | 7_Enh      | 32  | 1.1045 | 0.0307 | 0.2478 |
| 0.01     | E002 | 1_TssA     | 809 | 1.1039 | 0.0085 | 0.0025 |
| 0.01     | E086 | 1_TssA     | 859 | 1.1038 | 0.0090 | 0.0020 |
| 0.01     | E024 | 2_TssAFlnk | 185 | 1.1030 | 0.0019 | 0.0865 |
| 0.01     | E102 | 1_TssA     | 685 | 1.1027 | 0.0072 | 0.0054 |
| 0.01     | E015 | 3_TxFlnk   | 85  | 1.1026 | 0.0009 | 0.1684 |
| 0.01     | E106 | 12_EnhBiv  | 106 | 1.1025 | 0.0011 | 0.1457 |
| 1.00E-05 | E125 | 7_Enh      | 3   | 1.1025 | 0.0316 | 0.2897 |
| 0.01     | E039 | 1_TssA     | 409 | 1.1023 | 0.0043 | 0.0240 |
| 0.01     | E129 | 1_TssA     | 694 | 1.1018 | 0.0073 | 0.0054 |
| 0.01     | E044 | 3_TxFlnk   | 112 | 1.1017 | 0.0012 | 0.1415 |
| 0.001    | E118 | 1_TssA     | 45  | 1.1013 | 0.0048 | 0.2297 |
| 0.001    | E082 | 2_TssAFlnk | 40  | 1.1010 | 0.0043 | 0.2397 |
| 0.01     | E055 | 3_TxFlnk   | 309 | 1.1002 | 0.0033 | 0.0451 |
| 0.01     | E054 | 1_TssA     | 735 | 1.1002 | 0.0077 | 0.0049 |
| 0.01     | E108 | 1_TssA     | 578 | 1.0998 | 0.0061 | 0.0111 |
| 0.001    | E043 | 2_TssAFlnk | 78  | 1.0998 | 0.0084 | 0.1822 |
| 0.01     | E096 | 3_TxFlnk   | 14  | 1.0997 | 0.0001 | 0.2976 |
| 0.01     | E033 | 1_TssA     | 560 | 1.0990 | 0.0059 | 0.0127 |
| 0.01     | E042 | 12_EnhBiv  | 109 | 1.0988 | 0.0011 | 0.1506 |
| 0.01     | E068 | 12_EnhBiv  | 33  | 1.0987 | 0.0003 | 0.2576 |

|          |      |            |     |        |        |        |
|----------|------|------------|-----|--------|--------|--------|
| 0.01     | E041 | 3_TxFlnk   | 149 | 1.0986 | 0.0016 | 0.1177 |
| 0.01     | E028 | 1_TssA     | 635 | 1.0982 | 0.0067 | 0.0092 |
| 0.01     | E045 | 10_TssBiv  | 30  | 1.0981 | 0.0003 | 0.2648 |
| 0.01     | E113 | 1_TssA     | 456 | 1.0976 | 0.0048 | 0.0230 |
| 0.01     | E023 | 1_TssA     | 931 | 1.0976 | 0.0098 | 0.0023 |
| 0.01     | E127 | 12_EnhBiv  | 88  | 1.0976 | 0.0009 | 0.1754 |
| 0.01     | E107 | 1_TssA     | 575 | 1.0975 | 0.0061 | 0.0128 |
| 1.00E-04 | E122 | 2_TssAFlnk | 8   | 1.0974 | 0.0077 | 0.3090 |
| 0.01     | E078 | 2_TssAFlnk | 354 | 1.0973 | 0.0037 | 0.0393 |
| 0.01     | E111 | 10_TssBiv  | 104 | 1.0964 | 0.0011 | 0.1606 |
| 0.001    | E031 | 2_TssAFlnk | 85  | 1.0963 | 0.0091 | 0.1809 |
| 0.01     | E003 | 11_BivFlnk | 163 | 1.0959 | 0.0017 | 0.1139 |
| 0.001    | E069 | 2_TssAFlnk | 45  | 1.0956 | 0.0048 | 0.2401 |
| 0.001    | E091 | 2_TssAFlnk | 34  | 1.0955 | 0.0036 | 0.2607 |
| 0.01     | E011 | 10_TssBiv  | 174 | 1.0951 | 0.0018 | 0.1088 |
| 0.001    | E061 | 6_EnhG     | 66  | 1.0940 | 0.0071 | 0.2103 |
| 0.01     | E003 | 1_TssA     | 752 | 1.0935 | 0.0079 | 0.0072 |
| 0.01     | E013 | 10_TssBiv  | 119 | 1.0929 | 0.0013 | 0.1544 |
| 0.01     | E087 | 2_TssAFlnk | 152 | 1.0927 | 0.0016 | 0.1286 |
| 0.01     | E023 | 3_TxFlnk   | 60  | 1.0923 | 0.0006 | 0.2231 |
| 0.01     | E037 | 6_EnhG     | 220 | 1.0921 | 0.0023 | 0.0910 |
| 0.01     | E022 | 11_BivFlnk | 154 | 1.0921 | 0.0016 | 0.1287 |
| 0.01     | E058 | 10_TssBiv  | 110 | 1.0920 | 0.0012 | 0.1648 |
| 1.00E-04 | E030 | 1_TssA     | 3   | 1.0920 | 0.0029 | 0.2963 |
| 0.01     | E097 | 12_EnhBiv  | 22  | 1.0919 | 0.0002 | 0.2909 |
| 0.01     | E119 | 1_TssA     | 609 | 1.0918 | 0.0064 | 0.0150 |
| 0.01     | E008 | 3_TxFlnk   | 20  | 1.0917 | 0.0002 | 0.2953 |
| 0.01     | E001 | 12_EnhBiv  | 208 | 1.0916 | 0.0022 | 0.0977 |
| 0.01     | E057 | 10_TssBiv  | 204 | 1.0912 | 0.0021 | 0.1008 |
| 0.001    | E039 | 12_EnhBiv  | 9   | 1.0910 | 0.0010 | 0.3148 |
| 0.01     | E052 | 3_TxFlnk   | 83  | 1.0909 | 0.0009 | 0.1959 |
| 0.001    | E057 | 10_TssBiv  | 20  | 1.0907 | 0.0021 | 0.2965 |
| 0.01     | E038 | 1_TssA     | 562 | 1.0906 | 0.0059 | 0.0196 |
| 0.01     | E019 | 1_TssA     | 717 | 1.0905 | 0.0075 | 0.0101 |
| 1.00E-04 | E124 | 2_TssAFlnk | 17  | 1.0905 | 0.0163 | 0.3019 |
| 0.001    | E078 | 12_EnhBiv  | 8   | 1.0904 | 0.0009 | 0.3157 |
| 1.00E-04 | E010 | 2_TssAFlnk | 6   | 1.0904 | 0.0058 | 0.3141 |
| 0.01     | E025 | 1_TssA     | 988 | 1.0903 | 0.0104 | 0.0033 |
| 1.00E-04 | E090 | 6_EnhG     | 10  | 1.0901 | 0.0096 | 0.3143 |
| 0.01     | E127 | 1_TssA     | 606 | 1.0901 | 0.0064 | 0.0167 |
| 0.01     | E091 | 1_TssA     | 494 | 1.0889 | 0.0052 | 0.0286 |
| 0.01     | E074 | 1_TssA     | 833 | 1.0882 | 0.0088 | 0.0074 |
| 0.01     | E036 | 1_TssA     | 372 | 1.0867 | 0.0039 | 0.0526 |

|          |      |            |      |        |        |        |
|----------|------|------------|------|--------|--------|--------|
| 0.01     | E128 | 6_EnhG     | 385  | 1.0866 | 0.0041 | 0.0500 |
| 0.01     | E035 | 1_TssA     | 315  | 1.0863 | 0.0033 | 0.0681 |
| 0.01     | E124 | 6_EnhG     | 312  | 1.0862 | 0.0033 | 0.0692 |
| 1.00E-04 | E089 | 2_TssAFlnk | 3    | 1.0859 | 0.0029 | 0.2997 |
| 0.01     | E008 | 1_TssA     | 1063 | 1.0851 | 0.0112 | 0.0039 |
| 0.01     | E052 | 1_TssA     | 626  | 1.0850 | 0.0066 | 0.0203 |
| 0.01     | E048 | 1_TssA     | 549  | 1.0843 | 0.0058 | 0.0284 |
| 0.01     | E012 | 2_TssAFlnk | 129  | 1.0842 | 0.0014 | 0.1668 |
| 0.01     | E017 | 1_TssA     | 664  | 1.0842 | 0.0070 | 0.0184 |
| 0.001    | E017 | 6_EnhG     | 92   | 1.0842 | 0.0099 | 0.2007 |
| 0.001    | E015 | 1_TssA     | 88   | 1.0841 | 0.0094 | 0.2053 |
| 0.001    | E036 | 2_TssAFlnk | 77   | 1.0840 | 0.0083 | 0.2182 |
| 0.001    | E105 | 2_TssAFlnk | 28   | 1.0840 | 0.0030 | 0.2913 |
| 0.01     | E117 | 2_TssAFlnk | 831  | 1.0837 | 0.0087 | 0.0102 |
| 0.01     | E063 | 1_TssA     | 487  | 1.0837 | 0.0051 | 0.0371 |
| 0.01     | E013 | 1_TssA     | 843  | 1.0836 | 0.0089 | 0.0098 |
| 0.01     | E100 | 12_EnhBiv  | 23   | 1.0829 | 0.0002 | 0.3022 |
| 0.001    | E038 | 7_Enh      | 245  | 1.0828 | 0.0263 | 0.0988 |
| 0.01     | E114 | 1_TssA     | 931  | 1.0828 | 0.0098 | 0.0076 |
| 0.01     | E009 | 1_TssA     | 683  | 1.0826 | 0.0072 | 0.0187 |
| 0.01     | E001 | 1_TssA     | 1017 | 1.0825 | 0.0107 | 0.0057 |
| 0.01     | E045 | 1_TssA     | 631  | 1.0822 | 0.0066 | 0.0232 |
| 0.01     | E070 | 1_TssA     | 586  | 1.0820 | 0.0062 | 0.0276 |
| 1.00E-04 | E118 | 10_TssBiv  | 4    | 1.0820 | 0.0038 | 0.3121 |
| 0.001    | E020 | 12_EnhBiv  | 20   | 1.0819 | 0.0021 | 0.3089 |
| 0.01     | E117 | 12_EnhBiv  | 10   | 1.0816 | 0.0001 | 0.3235 |
| 0.01     | E023 | 10_TssBiv  | 48   | 1.0813 | 0.0005 | 0.2635 |
| 0.01     | E067 | 1_TssA     | 928  | 1.0809 | 0.0098 | 0.0088 |
| 0.01     | E120 | 3_TxFlnk   | 64   | 1.0806 | 0.0007 | 0.2429 |
| 0.01     | E107 | 11_BivFlnk | 188  | 1.0802 | 0.0020 | 0.1367 |
| 0.01     | E004 | 1_TssA     | 694  | 1.0802 | 0.0073 | 0.0208 |
| 0.01     | E066 | 12_EnhBiv  | 91   | 1.0800 | 0.0010 | 0.2130 |
| 0.01     | E128 | 1_TssA     | 836  | 1.0800 | 0.0088 | 0.0129 |
| 0.01     | E055 | 10_TssBiv  | 105  | 1.0796 | 0.0011 | 0.2000 |
| 0.01     | E015 | 10_TssBiv  | 347  | 1.0795 | 0.0037 | 0.0741 |
| 0.01     | E056 | 10_TssBiv  | 146  | 1.0794 | 0.0015 | 0.1663 |
| 1.00E-04 | E088 | 2_TssAFlnk | 4    | 1.0794 | 0.0038 | 0.3138 |
| 0.01     | E033 | 3_TxFlnk   | 53   | 1.0793 | 0.0006 | 0.2605 |
| 0.01     | E021 | 1_TssA     | 787  | 1.0789 | 0.0083 | 0.0164 |
| 0.001    | E042 | 7_Enh      | 229  | 1.0785 | 0.0246 | 0.1174 |
| 0.001    | E066 | 7_Enh      | 345  | 1.0782 | 0.0370 | 0.0746 |
| 0.01     | E065 | 1_TssA     | 906  | 1.0780 | 0.0095 | 0.0118 |
| 0.01     | E129 | 6_EnhG     | 427  | 1.0779 | 0.0045 | 0.0585 |

|          |      |            |      |        |        |        |
|----------|------|------------|------|--------|--------|--------|
| 0.01     | E014 | 1_TssA     | 816  | 1.0779 | 0.0086 | 0.0158 |
| 0.01     | E063 | 11_BivFlnk | 121  | 1.0774 | 0.0013 | 0.1916 |
| 0.01     | E090 | 1_TssA     | 498  | 1.0772 | 0.0052 | 0.0471 |
| 0.001    | E095 | 6_EnhG     | 43   | 1.0770 | 0.0046 | 0.2793 |
| 0.01     | E017 | 3_TxFlnk   | 68   | 1.0770 | 0.0007 | 0.2462 |
| 0.01     | E072 | 12_EnhBiv  | 49   | 1.0769 | 0.0005 | 0.2713 |
| 0.01     | E006 | 1_TssA     | 505  | 1.0764 | 0.0053 | 0.0476 |
| 1.00E-04 | E006 | 7_Enh      | 31   | 1.0760 | 0.0297 | 0.2980 |
| 0.01     | E027 | 1_TssA     | 860  | 1.0758 | 0.0091 | 0.0158 |
| 0.001    | E026 | 10_TssBiv  | 6    | 1.0758 | 0.0006 | 0.3261 |
| 0.01     | E059 | 2_TssAFlnk | 274  | 1.0755 | 0.0029 | 0.1089 |
| 0.01     | E089 | 11_BivFlnk | 238  | 1.0752 | 0.0025 | 0.1251 |
| 0.001    | E014 | 3_TxFlnk   | 5    | 1.0746 | 0.0005 | 0.3233 |
| 0.001    | E087 | 7_Enh      | 132  | 1.0742 | 0.0142 | 0.1901 |
| 0.01     | E048 | 12_EnhBiv  | 65   | 1.0738 | 0.0007 | 0.2573 |
| 0.01     | E029 | 1_TssA     | 348  | 1.0738 | 0.0037 | 0.0883 |
| 1.00E-04 | E023 | 1_TssA     | 10   | 1.0737 | 0.0096 | 0.3314 |
| 1.00E-04 | E091 | 7_Enh      | 42   | 1.0734 | 0.0403 | 0.2855 |
| 0.01     | E113 | 2_TssAFlnk | 140  | 1.0732 | 0.0015 | 0.1885 |
| 0.01     | E118 | 1_TssA     | 447  | 1.0730 | 0.0047 | 0.0658 |
| 0.01     | E016 | 11_BivFlnk | 93   | 1.0730 | 0.0010 | 0.2291 |
| 0.001    | E045 | 12_EnhBiv  | 7    | 1.0730 | 0.0008 | 0.3307 |
| 0.001    | E045 | 7_Enh      | 132  | 1.0729 | 0.0142 | 0.1939 |
| 0.01     | E083 | 11_BivFlnk | 12   | 1.0723 | 0.0001 | 0.3324 |
| 0.001    | E031 | 11_BivFlnk | 5    | 1.0722 | 0.0005 | 0.3252 |
| 0.01     | E087 | 1_TssA     | 1171 | 1.0718 | 0.0123 | 0.0086 |
| 0.01     | E047 | 11_BivFlnk | 22   | 1.0714 | 0.0002 | 0.3214 |
| 0.01     | E012 | 1_TssA     | 632  | 1.0698 | 0.0067 | 0.0437 |
| 0.01     | E034 | 10_TssBiv  | 22   | 1.0698 | 0.0002 | 0.3240 |
| 0.001    | E110 | 2_TssAFlnk | 19   | 1.0691 | 0.0020 | 0.3289 |
| 0.01     | E007 | 12_EnhBiv  | 37   | 1.0691 | 0.0004 | 0.3041 |
| 0.01     | E094 | 1_TssA     | 630  | 1.0687 | 0.0066 | 0.0463 |
| 0.01     | E016 | 1_TssA     | 806  | 1.0685 | 0.0085 | 0.0293 |
| 0.01     | E036 | 12_EnhBiv  | 149  | 1.0683 | 0.0016 | 0.1967 |
| 0.01     | E123 | 2_TssAFlnk | 680  | 1.0682 | 0.0072 | 0.0414 |
| 0.001    | E085 | 11_BivFlnk | 9    | 1.0675 | 0.0010 | 0.3381 |
| 0.01     | E030 | 1_TssA     | 267  | 1.0671 | 0.0028 | 0.1373 |
| 0.01     | E059 | 3_TxFlnk   | 75   | 1.0670 | 0.0008 | 0.2631 |
| 0.01     | E006 | 10_TssBiv  | 19   | 1.0670 | 0.0002 | 0.3321 |
| 0.01     | E099 | 1_TssA     | 532  | 1.0666 | 0.0056 | 0.0661 |
| 0.01     | E110 | 1_TssA     | 490  | 1.0664 | 0.0052 | 0.0747 |
| 1.00E-04 | E044 | 7_Enh      | 17   | 1.0661 | 0.0163 | 0.3348 |
| 0.01     | E007 | 1_TssA     | 667  | 1.0657 | 0.0070 | 0.0488 |

|          |      |            |     |        |        |        |
|----------|------|------------|-----|--------|--------|--------|
| 1.00E-04 | E119 | 7_Enh      | 44  | 1.0644 | 0.0422 | 0.3015 |
| 0.01     | E083 | 1_TssA     | 397 | 1.0644 | 0.0042 | 0.1026 |
| 0.01     | E084 | 2_TssAFlnk | 256 | 1.0642 | 0.0027 | 0.1517 |
| 0.01     | E049 | 1_TssA     | 605 | 1.0640 | 0.0064 | 0.0614 |
| 1.00E-04 | E058 | 7_Enh      | 38  | 1.0628 | 0.0364 | 0.3130 |
| 0.01     | E015 | 12_EnhBiv  | 240 | 1.0627 | 0.0025 | 0.1642 |
| 0.01     | E002 | 10_TssBiv  | 145 | 1.0626 | 0.0015 | 0.2174 |
| 0.01     | E100 | 1_TssA     | 867 | 1.0625 | 0.0091 | 0.0362 |
| 0.01     | E116 | 1_TssA     | 892 | 1.0625 | 0.0094 | 0.0342 |
| 0.001    | E009 | 10_TssBiv  | 7   | 1.0622 | 0.0008 | 0.3404 |
| 0.001    | E078 | 6_EnhG     | 16  | 1.0620 | 0.0017 | 0.3422 |
| 0.01     | E091 | 2_TssAFlnk | 336 | 1.0618 | 0.0035 | 0.1297 |
| 0.01     | E069 | 6_EnhG     | 238 | 1.0616 | 0.0025 | 0.1690 |
| 0.01     | E082 | 1_TssA     | 795 | 1.0610 | 0.0084 | 0.0461 |
| 0.01     | E020 | 10_TssBiv  | 392 | 1.0609 | 0.0041 | 0.1160 |
| 0.01     | E047 | 1_TssA     | 485 | 1.0609 | 0.0051 | 0.0930 |
| 0.01     | E047 | 6_EnhG     | 186 | 1.0607 | 0.0020 | 0.1988 |
| 0.001    | E013 | 6_EnhG     | 43  | 1.0601 | 0.0046 | 0.3148 |
| 0.01     | E117 | 1_TssA     | 688 | 1.0599 | 0.0072 | 0.0616 |
| 0.001    | E081 | 11_BivFlnk | 4   | 1.0598 | 0.0004 | 0.3271 |
| 0.01     | E126 | 1_TssA     | 816 | 1.0598 | 0.0086 | 0.0472 |
| 0.01     | E111 | 1_TssA     | 805 | 1.0593 | 0.0085 | 0.0497 |
| 0.001    | E044 | 2_TssAFlnk | 67  | 1.0591 | 0.0072 | 0.2912 |
| 0.01     | E097 | 1_TssA     | 885 | 1.0591 | 0.0093 | 0.0425 |
| 0.01     | E120 | 1_TssA     | 789 | 1.0591 | 0.0083 | 0.0518 |
| 0.01     | E062 | 1_TssA     | 236 | 1.0588 | 0.0025 | 0.1802 |
| 0.01     | E034 | 6_EnhG     | 724 | 1.0586 | 0.0076 | 0.0607 |
| 0.01     | E055 | 2_TssAFlnk | 703 | 1.0571 | 0.0074 | 0.0683 |
| 0.01     | E009 | 10_TssBiv  | 71  | 1.0567 | 0.0007 | 0.2944 |
| 0.01     | E073 | 10_TssBiv  | 91  | 1.0564 | 0.0010 | 0.2777 |
| 0.001    | E091 | 1_TssA     | 47  | 1.0562 | 0.0050 | 0.3188 |
| 0.01     | E005 | 1_TssA     | 489 | 1.0560 | 0.0051 | 0.1099 |
| 0.01     | E115 | 1_TssA     | 312 | 1.0556 | 0.0033 | 0.1618 |
| 0.01     | E104 | 6_EnhG     | 39  | 1.0555 | 0.0004 | 0.3293 |
| 0.01     | E055 | 1_TssA     | 714 | 1.0554 | 0.0075 | 0.0724 |
| 0.01     | E073 | 1_TssA     | 921 | 1.0550 | 0.0097 | 0.0505 |
| 0.01     | E125 | 1_TssA     | 611 | 1.0548 | 0.0064 | 0.0903 |
| 0.001    | E019 | 1_TssA     | 68  | 1.0545 | 0.0073 | 0.3026 |
| 0.01     | E047 | 3_TxFlnk   | 12  | 1.0542 | 0.0001 | 0.3539 |
| 0.001    | E037 | 7_Enh      | 296 | 1.0537 | 0.0318 | 0.1721 |
| 0.01     | E025 | 11_BivFlnk | 33  | 1.0537 | 0.0003 | 0.3390 |
| 0.01     | E066 | 1_TssA     | 519 | 1.0533 | 0.0055 | 0.1141 |
| 0.01     | E109 | 1_TssA     | 535 | 1.0532 | 0.0056 | 0.1110 |

|          |      |            |      |        |        |        |
|----------|------|------------|------|--------|--------|--------|
| 0.01     | E008 | 10_TssBiv  | 179  | 1.0530 | 0.0019 | 0.2309 |
| 0.01     | E058 | 2_TssAFlnk | 553  | 1.0527 | 0.0058 | 0.1095 |
| 0.01     | E105 | 1_TssA     | 871  | 1.0526 | 0.0092 | 0.0631 |
| 0.01     | E071 | 1_TssA     | 820  | 1.0523 | 0.0086 | 0.0698 |
| 0.001    | E076 | 12_EnhBiv  | 4    | 1.0520 | 0.0004 | 0.3326 |
| 0.001    | E019 | 10_TssBiv  | 32   | 1.0519 | 0.0034 | 0.3434 |
| 0.01     | E068 | 1_TssA     | 1015 | 1.0515 | 0.0107 | 0.0529 |
| 1.00E-05 | E023 | 7_Enh      | 4    | 1.0513 | 0.0421 | 0.3322 |
| 0.01     | E019 | 2_TssAFlnk | 331  | 1.0513 | 0.0035 | 0.1733 |
| 0.01     | E040 | 1_TssA     | 404  | 1.0502 | 0.0043 | 0.1556 |
| 0.01     | E103 | 1_TssA     | 968  | 1.0502 | 0.0102 | 0.0617 |
| 0.01     | E077 | 1_TssA     | 808  | 1.0500 | 0.0085 | 0.0801 |
| 0.001    | E047 | 2_TssAFlnk | 42   | 1.0498 | 0.0045 | 0.3385 |
| 0.01     | E108 | 10_TssBiv  | 74   | 1.0498 | 0.0008 | 0.3111 |
| 0.01     | E078 | 1_TssA     | 875  | 1.0496 | 0.0092 | 0.0734 |
| 0.001    | E045 | 2_TssAFlnk | 40   | 1.0496 | 0.0043 | 0.3406 |
| 0.01     | E125 | 12_EnhBiv  | 69   | 1.0495 | 0.0007 | 0.3159 |
| 0.01     | E048 | 11_BivFlnk | 18   | 1.0492 | 0.0002 | 0.3592 |
| 0.01     | E102 | 12_EnhBiv  | 60   | 1.0488 | 0.0006 | 0.3251 |
| 0.01     | E032 | 10_TssBiv  | 9    | 1.0486 | 0.0001 | 0.3578 |
| 0.01     | E071 | 10_TssBiv  | 106  | 1.0483 | 0.0011 | 0.2920 |
| 0.01     | E018 | 10_TssBiv  | 405  | 1.0481 | 0.0043 | 0.1654 |
| 0.01     | E092 | 1_TssA     | 534  | 1.0480 | 0.0056 | 0.1339 |
| 0.01     | E095 | 2_TssAFlnk | 154  | 1.0478 | 0.0016 | 0.2646 |
| 0.001    | E090 | 10_TssBiv  | 7    | 1.0477 | 0.0008 | 0.3539 |
| 0.001    | E108 | 11_BivFlnk | 11   | 1.0477 | 0.0012 | 0.3612 |
| 0.01     | E080 | 10_TssBiv  | 74   | 1.0474 | 0.0008 | 0.3179 |
| 0.01     | E123 | 11_BivFlnk | 9    | 1.0473 | 0.0001 | 0.3592 |
| 0.01     | E125 | 6_EnhG     | 207  | 1.0472 | 0.0022 | 0.2403 |
| 0.01     | E075 | 6_EnhG     | 123  | 1.0471 | 0.0013 | 0.2852 |
| 1.00E-04 | E121 | 2_TssAFlnk | 4    | 1.0470 | 0.0038 | 0.3361 |
| 1.00E-04 | E006 | 6_EnhG     | 11   | 1.0465 | 0.0105 | 0.3623 |
| 1.00E-04 | E084 | 7_Enh      | 35   | 1.0463 | 0.0336 | 0.3506 |
| 0.001    | E044 | 7_Enh      | 149  | 1.0461 | 0.0160 | 0.2726 |
| 0.001    | E089 | 1_TssA     | 50   | 1.0460 | 0.0054 | 0.3403 |
| 0.001    | E077 | 7_Enh      | 226  | 1.0457 | 0.0243 | 0.2359 |
| 0.01     | E069 | 1_TssA     | 808  | 1.0456 | 0.0085 | 0.0990 |
| 0.001    | E079 | 10_TssBiv  | 3    | 1.0455 | 0.0003 | 0.3235 |
| 1.00E-04 | E026 | 7_Enh      | 36   | 1.0454 | 0.0345 | 0.3516 |
| 0.01     | E014 | 10_TssBiv  | 299  | 1.0452 | 0.0031 | 0.2121 |
| 0.01     | E081 | 7_Enh      | 3167 | 1.0450 | 0.0333 | 0.0060 |
| 0.01     | E020 | 11_BivFlnk | 128  | 1.0448 | 0.0013 | 0.2906 |
| 1.00E-04 | E092 | 7_Enh      | 27   | 1.0446 | 0.0259 | 0.3605 |



|          |      |            |     |        |        |        |
|----------|------|------------|-----|--------|--------|--------|
| 0.001    | E027 | 3_TxFlnk   | 7   | 1.0446 | 0.0008 | 0.3568 |
| 0.01     | E121 | 1_TssA     | 771 | 1.0445 | 0.0081 | 0.1094 |
| 0.01     | E081 | 1_TssA     | 378 | 1.0443 | 0.0040 | 0.1915 |
| 0.01     | E112 | 11_BivFlnk | 80  | 1.0442 | 0.0008 | 0.3231 |
| 0.01     | E092 | 12_EnhBiv  | 590 | 1.0441 | 0.0062 | 0.1422 |
| 0.001    | E120 | 2_TssAFlnk | 37  | 1.0440 | 0.0040 | 0.3553 |
| 0.01     | E115 | 3_TxFlnk   | 213 | 1.0440 | 0.0022 | 0.2513 |
| 0.01     | E043 | 1_TssA     | 329 | 1.0438 | 0.0035 | 0.2089 |
| 0.001    | E076 | 10_TssBiv  | 7   | 1.0438 | 0.0008 | 0.3576 |
| 0.01     | E035 | 12_EnhBiv  | 97  | 1.0435 | 0.0010 | 0.3140 |
| 0.001    | E096 | 2_TssAFlnk | 13  | 1.0433 | 0.0014 | 0.3679 |
| 0.01     | E096 | 1_TssA     | 583 | 1.0433 | 0.0061 | 0.1477 |
| 0.01     | E122 | 1_TssA     | 444 | 1.0432 | 0.0047 | 0.1790 |
| 0.001    | E001 | 2_TssAFlnk | 22  | 1.0430 | 0.0024 | 0.3671 |
| 0.01     | E076 | 1_TssA     | 759 | 1.0426 | 0.0080 | 0.1212 |
| 0.01     | E042 | 6_EnhG     | 342 | 1.0425 | 0.0036 | 0.2111 |
| 0.01     | E050 | 2_TssAFlnk | 948 | 1.0421 | 0.0100 | 0.0988 |
| 0.01     | E085 | 1_TssA     | 630 | 1.0420 | 0.0066 | 0.1457 |
| 0.001    | E061 | 2_TssAFlnk | 37  | 1.0420 | 0.0040 | 0.3597 |
| 0.01     | E121 | 12_EnhBiv  | 47  | 1.0417 | 0.0005 | 0.3533 |
| 1.00E-04 | E111 | 2_TssAFlnk | 10  | 1.0416 | 0.0096 | 0.3669 |
| 0.01     | E005 | 2_TssAFlnk | 168 | 1.0412 | 0.0018 | 0.2835 |
| 0.01     | E084 | 12_EnhBiv  | 143 | 1.0410 | 0.0015 | 0.2968 |
| 0.001    | E011 | 2_TssAFlnk | 27  | 1.0408 | 0.0029 | 0.3685 |
| 1.00E-04 | E058 | 2_TssAFlnk | 6   | 1.0402 | 0.0058 | 0.3564 |
| 0.001    | E124 | 7_Enh      | 244 | 1.0395 | 0.0262 | 0.2571 |
| 0.01     | E109 | 6_EnhG     | 20  | 1.0389 | 0.0002 | 0.3746 |
| 0.001    | E027 | 2_TssAFlnk | 39  | 1.0389 | 0.0042 | 0.3651 |
| 0.01     | E041 | 1_TssA     | 479 | 1.0388 | 0.0050 | 0.1946 |
| 0.01     | E018 | 12_EnhBiv  | 242 | 1.0388 | 0.0025 | 0.2638 |
| 0.01     | E123 | 1_TssA     | 729 | 1.0386 | 0.0077 | 0.1479 |
| 0.001    | E037 | 1_TssA     | 48  | 1.0382 | 0.0052 | 0.3611 |
| 0.01     | E109 | 2_TssAFlnk | 30  | 1.0380 | 0.0003 | 0.3725 |
| 0.01     | E075 | 2_TssAFlnk | 365 | 1.0379 | 0.0038 | 0.2288 |
| 1.00E-05 | E121 | 7_Enh      | 3   | 1.0376 | 0.0316 | 0.3280 |
| 0.01     | E026 | 10_TssBiv  | 59  | 1.0376 | 0.0006 | 0.3561 |
| 0.01     | E057 | 12_EnhBiv  | 136 | 1.0373 | 0.0014 | 0.3147 |
| 0.001    | E079 | 2_TssAFlnk | 16  | 1.0372 | 0.0017 | 0.3773 |
| 0.01     | E046 | 2_TssAFlnk | 436 | 1.0369 | 0.0046 | 0.2160 |
| 0.001    | E056 | 12_EnhBiv  | 34  | 1.0368 | 0.0036 | 0.3726 |
| 0.01     | E024 | 1_TssA     | 662 | 1.0367 | 0.0070 | 0.1705 |
| 0.01     | E035 | 2_TssAFlnk | 754 | 1.0367 | 0.0079 | 0.1559 |
| 0.01     | E079 | 2_TssAFlnk | 163 | 1.0363 | 0.0017 | 0.3064 |

|          |      |            |      |        |        |        |
|----------|------|------------|------|--------|--------|--------|
| 0.01     | E026 | 1_TssA     | 760  | 1.0362 | 0.0080 | 0.1582 |
| 0.01     | E088 | 10_TssBiv  | 57   | 1.0361 | 0.0006 | 0.3613 |
| 0.01     | E032 | 1_TssA     | 344  | 1.0361 | 0.0036 | 0.2449 |
| 0.01     | E020 | 1_TssA     | 791  | 1.0359 | 0.0083 | 0.1553 |
| 0.01     | E055 | 11_BivFlnk | 200  | 1.0359 | 0.0021 | 0.2933 |
| 0.01     | E122 | 6_EnhG     | 293  | 1.0356 | 0.0031 | 0.2624 |
| 0.01     | E124 | 1_TssA     | 381  | 1.0356 | 0.0040 | 0.2373 |
| 1.00E-04 | E075 | 7_Enh      | 12   | 1.0354 | 0.0115 | 0.3770 |
| 0.01     | E107 | 6_EnhG     | 483  | 1.0353 | 0.0051 | 0.2149 |
| 0.01     | E025 | 2_TssAFlnk | 762  | 1.0352 | 0.0080 | 0.1645 |
| 0.001    | E038 | 2_TssAFlnk | 52   | 1.0351 | 0.0056 | 0.3665 |
| 0.01     | E120 | 2_TssAFlnk | 374  | 1.0351 | 0.0039 | 0.2424 |
| 0.01     | E082 | 10_TssBiv  | 172  | 1.0350 | 0.0018 | 0.3086 |
| 1.00E-04 | E053 | 6_EnhG     | 3    | 1.0348 | 0.0029 | 0.3301 |
| 0.01     | E126 | 6_EnhG     | 323  | 1.0344 | 0.0034 | 0.2600 |
| 1.00E-04 | E040 | 7_Enh      | 28   | 1.0341 | 0.0268 | 0.3799 |
| 0.001    | E072 | 2_TssAFlnk | 44   | 1.0340 | 0.0047 | 0.3736 |
| 0.001    | E078 | 11_BivFlnk | 8    | 1.0340 | 0.0009 | 0.3708 |
| 1.00E-05 | E083 | 7_Enh      | 5    | 1.0338 | 0.0526 | 0.3546 |
| 0.001    | E109 | 7_Enh      | 136  | 1.0337 | 0.0146 | 0.3282 |
| 0.01     | E104 | 1_TssA     | 1011 | 1.0337 | 0.0106 | 0.1412 |
| 0.01     | E068 | 6_EnhG     | 240  | 1.0333 | 0.0025 | 0.2914 |
| 0.01     | E021 | 6_EnhG     | 44   | 1.0333 | 0.0005 | 0.3757 |
| 0.01     | E106 | 1_TssA     | 545  | 1.0332 | 0.0057 | 0.2152 |
| 1.00E-04 | E011 | 2_TssAFlnk | 3    | 1.0330 | 0.0029 | 0.3313 |
| 1.00E-04 | E119 | 2_TssAFlnk | 6    | 1.0326 | 0.0058 | 0.3632 |
| 0.01     | E049 | 3_TxFlnk   | 59   | 1.0323 | 0.0006 | 0.3705 |
| 0.01     | E026 | 3_TxFlnk   | 75   | 1.0319 | 0.0008 | 0.3640 |
| 0.01     | E051 | 1_TssA     | 305  | 1.0318 | 0.0032 | 0.2796 |
| 0.01     | E121 | 2_TssAFlnk | 359  | 1.0317 | 0.0038 | 0.2659 |
| 0.01     | E052 | 12_EnhBiv  | 86   | 1.0317 | 0.0009 | 0.3595 |
| 0.01     | E024 | 10_TssBiv  | 57   | 1.0311 | 0.0006 | 0.3750 |
| 0.01     | E057 | 3_TxFlnk   | 118  | 1.0311 | 0.0012 | 0.3473 |
| 0.01     | E102 | 2_TssAFlnk | 554  | 1.0307 | 0.0058 | 0.2297 |
| 0.01     | E081 | 12_EnhBiv  | 339  | 1.0298 | 0.0036 | 0.2823 |
| 1.00E-04 | E093 | 2_TssAFlnk | 4    | 1.0296 | 0.0038 | 0.3486 |
| 0.01     | E070 | 10_TssBiv  | 214  | 1.0295 | 0.0023 | 0.3192 |
| 0.01     | E056 | 12_EnhBiv  | 344  | 1.0289 | 0.0036 | 0.2866 |
| 0.01     | E079 | 1_TssA     | 661  | 1.0287 | 0.0070 | 0.2259 |
| 0.01     | E082 | 2_TssAFlnk | 381  | 1.0286 | 0.0040 | 0.2801 |
| 0.001    | E088 | 12_EnhBiv  | 19   | 1.0286 | 0.0020 | 0.3914 |
| 0.01     | E011 | 3_TxFlnk   | 105  | 1.0283 | 0.0011 | 0.3631 |
| 0.001    | E003 | 11_BivFlnk | 15   | 1.0282 | 0.0016 | 0.3898 |

|          |      |            |      |        |        |        |
|----------|------|------------|------|--------|--------|--------|
| 0.01     | E095 | 1_TssA     | 740  | 1.0282 | 0.0078 | 0.2177 |
| 0.01     | E074 | 10_TssBiv  | 40   | 1.0278 | 0.0004 | 0.3903 |
| 0.001    | E042 | 12_EnhBiv  | 10   | 1.0278 | 0.0011 | 0.3832 |
| 0.01     | E006 | 2_TssAFlnk | 226  | 1.0275 | 0.0024 | 0.3260 |
| 0.001    | E088 | 2_TssAFlnk | 34   | 1.0271 | 0.0036 | 0.3934 |
| 0.01     | E021 | 11_BivFlnk | 31   | 1.0270 | 0.0003 | 0.3944 |
| 0.01     | E052 | 6_EnhG     | 378  | 1.0269 | 0.0040 | 0.2912 |
| 0.01     | E063 | 10_TssBiv  | 32   | 1.0267 | 0.0003 | 0.3949 |
| 0.001    | E104 | 7_Enh      | 248  | 1.0265 | 0.0266 | 0.3235 |
| 0.01     | E022 | 1_TssA     | 597  | 1.0262 | 0.0063 | 0.2549 |
| 0.001    | E081 | 7_Enh      | 305  | 1.0261 | 0.0327 | 0.3107 |
| 0.01     | E009 | 2_TssAFlnk | 286  | 1.0261 | 0.0030 | 0.3178 |
| 0.01     | E020 | 3_TxFlnk   | 71   | 1.0260 | 0.0007 | 0.3839 |
| 0.01     | E011 | 1_TssA     | 935  | 1.0260 | 0.0098 | 0.2097 |
| 1.00E-04 | E115 | 2_TssAFlnk | 8    | 1.0248 | 0.0077 | 0.3804 |
| 1.00E-04 | E028 | 7_Enh      | 43   | 1.0247 | 0.0412 | 0.3957 |
| 0.01     | E036 | 2_TssAFlnk | 742  | 1.0245 | 0.0078 | 0.2468 |
| 0.01     | E054 | 11_BivFlnk | 79   | 1.0244 | 0.0008 | 0.3864 |
| 0.01     | E066 | 2_TssAFlnk | 684  | 1.0242 | 0.0072 | 0.2579 |
| 0.001    | E028 | 12_EnhBiv  | 8    | 1.0240 | 0.0009 | 0.3813 |
| 1.00E-04 | E032 | 6_EnhG     | 7    | 1.0240 | 0.0067 | 0.3768 |
| 0.01     | E093 | 1_TssA     | 394  | 1.0239 | 0.0041 | 0.3080 |
| 0.001    | E117 | 2_TssAFlnk | 77   | 1.0238 | 0.0083 | 0.3886 |
| 0.01     | E050 | 1_TssA     | 256  | 1.0237 | 0.0027 | 0.3386 |
| 0.01     | E016 | 12_EnhBiv  | 195  | 1.0236 | 0.0021 | 0.3547 |
| 0.01     | E041 | 12_EnhBiv  | 167  | 1.0234 | 0.0018 | 0.3630 |
| 0.001    | E042 | 2_TssAFlnk | 57   | 1.0232 | 0.0061 | 0.3967 |
| 0.01     | E001 | 2_TssAFlnk | 220  | 1.0230 | 0.0023 | 0.3512 |
| 0.001    | E092 | 6_EnhG     | 62   | 1.0230 | 0.0067 | 0.3960 |
| 0.01     | E117 | 7_Enh      | 2591 | 1.0228 | 0.0273 | 0.1207 |
| 0.01     | E014 | 2_TssAFlnk | 318  | 1.0224 | 0.0033 | 0.3331 |
| 0.01     | E072 | 1_TssA     | 881  | 1.0218 | 0.0093 | 0.2531 |
| 0.01     | E010 | 2_TssAFlnk | 512  | 1.0217 | 0.0054 | 0.3036 |
| 1.00E-04 | E026 | 2_TssAFlnk | 8    | 1.0216 | 0.0077 | 0.3837 |
| 0.001    | E097 | 7_Enh      | 246  | 1.0209 | 0.0264 | 0.3555 |
| 1.00E-04 | E118 | 7_Enh      | 43   | 1.0205 | 0.0412 | 0.4061 |
| 0.01     | E031 | 1_TssA     | 284  | 1.0202 | 0.0030 | 0.3532 |
| 0.01     | E100 | 2_TssAFlnk | 127  | 1.0201 | 0.0013 | 0.3884 |
| 0.01     | E027 | 10_TssBiv  | 40   | 1.0197 | 0.0004 | 0.4096 |
| 1.00E-04 | E129 | 2_TssAFlnk | 8    | 1.0196 | 0.0077 | 0.3859 |
| 0.01     | E063 | 2_TssAFlnk | 839  | 1.0194 | 0.0088 | 0.2811 |
| 0.01     | E051 | 12_EnhBiv  | 208  | 1.0193 | 0.0022 | 0.3738 |
| 1.00E-04 | E007 | 1_TssA     | 7    | 1.0186 | 0.0067 | 0.3822 |

|          |      |            |      |        |        |        |
|----------|------|------------|------|--------|--------|--------|
| 0.01     | E046 | 1_TssA     | 346  | 1.0178 | 0.0036 | 0.3579 |
| 0.01     | E056 | 1_TssA     | 749  | 1.0177 | 0.0079 | 0.3072 |
| 0.001    | E082 | 7_Enh      | 155  | 1.0175 | 0.0166 | 0.3933 |
| 0.01     | E124 | 3_TxFlnk   | 73   | 1.0174 | 0.0008 | 0.4110 |
| 0.001    | E127 | 12_EnhBiv  | 8    | 1.0173 | 0.0009 | 0.3884 |
| 0.001    | E070 | 2_TssAFlnk | 41   | 1.0170 | 0.0044 | 0.4161 |
| 0.01     | E010 | 11_BivFlnk | 65   | 1.0169 | 0.0007 | 0.4138 |
| 0.001    | E018 | 1_TssA     | 85   | 1.0169 | 0.0091 | 0.4101 |
| 0.001    | E016 | 12_EnhBiv  | 19   | 1.0169 | 0.0020 | 0.4107 |
| 1.00E-04 | E102 | 2_TssAFlnk | 6    | 1.0167 | 0.0058 | 0.3778 |
| 0.001    | E113 | 2_TssAFlnk | 13   | 1.0160 | 0.0014 | 0.4045 |
| 1.00E-04 | E011 | 7_Enh      | 31   | 1.0159 | 0.0297 | 0.4173 |
| 0.01     | E107 | 10_TssBiv  | 91   | 1.0156 | 0.0010 | 0.4140 |
| 0.01     | E083 | 12_EnhBiv  | 118  | 1.0154 | 0.0012 | 0.4100 |
| 0.01     | E043 | 6_EnhG     | 532  | 1.0153 | 0.0056 | 0.3522 |
| 0.01     | E061 | 3_TxFlnk   | 58   | 1.0148 | 0.0006 | 0.4209 |
| 0.01     | E108 | 2_TssAFlnk | 782  | 1.0146 | 0.0082 | 0.3333 |
| 0.001    | E115 | 7_Enh      | 176  | 1.0145 | 0.0189 | 0.4039 |
| 0.01     | E080 | 7_Enh      | 3430 | 1.0141 | 0.0361 | 0.1996 |
| 0.001    | E110 | 11_BivFlnk | 3    | 1.0137 | 0.0003 | 0.3437 |
| 0.01     | E112 | 2_TssAFlnk | 315  | 1.0136 | 0.0033 | 0.3908 |
| 0.01     | E081 | 11_BivFlnk | 39   | 1.0135 | 0.0004 | 0.4244 |
| 0.01     | E073 | 2_TssAFlnk | 317  | 1.0133 | 0.0033 | 0.3923 |
| 0.001    | E106 | 7_Enh      | 165  | 1.0133 | 0.0177 | 0.4118 |
| 0.01     | E082 | 7_Enh      | 1573 | 1.0128 | 0.0166 | 0.3002 |
| 0.01     | E067 | 2_TssAFlnk | 307  | 1.0123 | 0.0032 | 0.4002 |
| 0.01     | E032 | 12_EnhBiv  | 262  | 1.0123 | 0.0028 | 0.4056 |
| 0.01     | E007 | 7_Enh      | 1881 | 1.0116 | 0.0198 | 0.3013 |
| 0.001    | E053 | 1_TssA     | 42   | 1.0114 | 0.0045 | 0.4301 |
| 0.01     | E025 | 3_TxFlnk   | 73   | 1.0112 | 0.0008 | 0.4313 |
| 0.01     | E061 | 2_TssAFlnk | 366  | 1.0109 | 0.0039 | 0.4039 |
| 1.00E-04 | E101 | 2_TssAFlnk | 6    | 1.0108 | 0.0058 | 0.3834 |
| 0.001    | E048 | 12_EnhBiv  | 6    | 1.0106 | 0.0006 | 0.3836 |
| 0.001    | E107 | 2_TssAFlnk | 77   | 1.0104 | 0.0083 | 0.4338 |
| 0.01     | E027 | 3_TxFlnk   | 69   | 1.0099 | 0.0007 | 0.4356 |
| 0.01     | E007 | 6_EnhG     | 36   | 1.0099 | 0.0004 | 0.4324 |
| 0.01     | E072 | 2_TssAFlnk | 438  | 1.0096 | 0.0046 | 0.4083 |
| 0.01     | E085 | 2_TssAFlnk | 245  | 1.0096 | 0.0026 | 0.4240 |
| 0.01     | E043 | 2_TssAFlnk | 730  | 1.0095 | 0.0077 | 0.3891 |
| 0.001    | E090 | 2_TssAFlnk | 33   | 1.0094 | 0.0035 | 0.4325 |
| 0.01     | E028 | 2_TssAFlnk | 164  | 1.0091 | 0.0017 | 0.4333 |
| 0.001    | E040 | 7_Enh      | 244  | 1.0088 | 0.0262 | 0.4278 |
| 0.001    | E047 | 7_Enh      | 261  | 1.0085 | 0.0280 | 0.4287 |

|          |      |            |      |        |        |        |
|----------|------|------------|------|--------|--------|--------|
| 0.01     | E112 | 1_TssA     | 563  | 1.0084 | 0.0059 | 0.4105 |
| 0.001    | E080 | 11_BivFlnk | 20   | 1.0083 | 0.0021 | 0.4263 |
| 0.001    | E107 | 7_Enh      | 303  | 1.0083 | 0.0325 | 0.4270 |
| 0.001    | E098 | 2_TssAFlnk | 27   | 1.0082 | 0.0029 | 0.4323 |
| 1.00E-04 | E110 | 7_Enh      | 35   | 1.0081 | 0.0336 | 0.4360 |
| 1.00E-04 | E017 | 7_Enh      | 36   | 1.0078 | 0.0345 | 0.4369 |
| 0.01     | E114 | 7_Enh      | 2467 | 1.0077 | 0.0260 | 0.3442 |
| 1.00E-04 | E043 | 2_TssAFlnk | 8    | 1.0076 | 0.0077 | 0.3990 |
| 1.00E-04 | E040 | 2_TssAFlnk | 5    | 1.0074 | 0.0048 | 0.3776 |
| 0.01     | E062 | 2_TssAFlnk | 513  | 1.0073 | 0.0054 | 0.4228 |
| 0.01     | E102 | 10_TssBiv  | 67   | 1.0073 | 0.0007 | 0.4440 |
| 0.001    | E058 | 6_EnhG     | 61   | 1.0071 | 0.0065 | 0.4440 |
| 0.01     | E057 | 1_TssA     | 606  | 1.0070 | 0.0064 | 0.4214 |
| 0.01     | E016 | 2_TssAFlnk | 231  | 1.0068 | 0.0024 | 0.4414 |
| 0.01     | E099 | 10_TssBiv  | 13   | 1.0068 | 0.0001 | 0.4173 |
| 0.01     | E040 | 2_TssAFlnk | 455  | 1.0066 | 0.0048 | 0.4320 |
| 0.001    | E018 | 12_EnhBiv  | 23   | 1.0065 | 0.0025 | 0.4324 |
| 0.01     | E087 | 10_TssBiv  | 44   | 1.0065 | 0.0005 | 0.4430 |
| 0.001    | E043 | 12_EnhBiv  | 14   | 1.0063 | 0.0015 | 0.4203 |
| 0.001    | E029 | 7_Enh      | 361  | 1.0062 | 0.0387 | 0.4387 |
| 1.00E-04 | E036 | 2_TssAFlnk | 8    | 1.0060 | 0.0077 | 0.4007 |
| 0.01     | E093 | 12_EnhBiv  | 232  | 1.0057 | 0.0024 | 0.4478 |
| 0.001    | E105 | 7_Enh      | 224  | 1.0049 | 0.0240 | 0.4529 |
| 1.00E-04 | E114 | 7_Enh      | 27   | 1.0045 | 0.0259 | 0.4397 |
| 1.00E-04 | E091 | 1_TssA     | 5    | 1.0038 | 0.0048 | 0.3807 |
| 0.01     | E075 | 1_TssA     | 689  | 1.0037 | 0.0073 | 0.4512 |
| 0.01     | E042 | 2_TssAFlnk | 570  | 1.0036 | 0.0060 | 0.4545 |
| 0.001    | E068 | 7_Enh      | 254  | 1.0036 | 0.0273 | 0.4602 |
| 0.01     | E110 | 7_Enh      | 3172 | 1.0031 | 0.0334 | 0.4241 |
| 0.01     | E061 | 10_TssBiv  | 66   | 1.0030 | 0.0007 | 0.4575 |
| 0.001    | E068 | 2_TssAFlnk | 46   | 1.0030 | 0.0049 | 0.4528 |
| 0.001    | E044 | 3_TxFlnk   | 10   | 1.0029 | 0.0011 | 0.4133 |
| 0.01     | E084 | 1_TssA     | 641  | 1.0028 | 0.0067 | 0.4610 |
| 0.01     | E089 | 12_EnhBiv  | 1367 | 1.0027 | 0.0144 | 0.4532 |
| 0.01     | E078 | 12_EnhBiv  | 75   | 1.0027 | 0.0008 | 0.4601 |
| 0.001    | E111 | 7_Enh      | 169  | 1.0022 | 0.0181 | 0.4679 |
| 0.01     | E041 | 11_BivFlnk | 82   | 1.0022 | 0.0009 | 0.4629 |
| 0.01     | E058 | 1_TssA     | 609  | 1.0021 | 0.0064 | 0.4683 |
| 0.001    | E089 | 12_EnhBiv  | 134  | 1.0021 | 0.0144 | 0.4673 |
| 0.01     | E090 | 2_TssAFlnk | 334  | 1.0021 | 0.0035 | 0.4703 |
| 0.001    | E056 | 7_Enh      | 187  | 1.0018 | 0.0201 | 0.4707 |
| 0.01     | E104 | 2_TssAFlnk | 151  | 1.0016 | 0.0016 | 0.4704 |
| 0.01     | E086 | 7_Enh      | 1570 | 1.0014 | 0.0165 | 0.4715 |

|          |      |            |      |        |        |        |
|----------|------|------------|------|--------|--------|--------|
| 0.01     | E115 | 12_EnhBiv  | 40   | 1.0011 | 0.0004 | 0.4552 |
| 0.001    | E062 | 2_TssAFlnk | 50   | 1.0010 | 0.0054 | 0.4597 |
| 0.001    | E093 | 3_TxFlnk   | 5    | 1.0009 | 0.0005 | 0.3832 |
| 0.01     | E006 | 7_Enh      | 2626 | 1.0008 | 0.0276 | 0.4785 |
| 0.01     | E059 | 1_TssA     | 718  | 1.0006 | 0.0076 | 0.4831 |
| 1.00E-04 | E087 | 1_TssA     | 12   | 1.0004 | 0.0115 | 0.4235 |
| 0.01     | E034 | 1_TssA     | 349  | 1.0000 | 0.0037 | 0.4860 |
| 0.001    | E101 | 2_TssAFlnk | 53   | 0.9995 | 0.0057 | 0.4650 |
| 0.01     | E119 | 6_EnhG     | 274  | 0.9994 | 0.0029 | 0.4877 |
| 0.001    | E100 | 10_TssBiv  | 8    | 0.9989 | 0.0009 | 0.4086 |
| 0.01     | E086 | 10_TssBiv  | 76   | 0.9986 | 0.0008 | 0.4743 |
| 1.00E-04 | E067 | 7_Enh      | 24   | 0.9986 | 0.0230 | 0.4487 |
| 0.01     | E055 | 7_Enh      | 3028 | 0.9979 | 0.0319 | 0.5422 |
| 1.00E-04 | E084 | 1_TssA     | 7    | 0.9974 | 0.0067 | 0.4040 |
| 0.01     | E052 | 2_TssAFlnk | 737  | 0.9970 | 0.0078 | 0.5225 |
| 0.01     | E037 | 12_EnhBiv  | 63   | 0.9968 | 0.0007 | 0.4767 |
| 0.01     | E072 | 7_Enh      | 2379 | 0.9966 | 0.0250 | 0.5609 |
| 0.01     | E048 | 7_Enh      | 2192 | 0.9964 | 0.0231 | 0.5615 |
| 1.00E-04 | E063 | 2_TssAFlnk | 9    | 0.9959 | 0.0086 | 0.4175 |
| 0.01     | E115 | 7_Enh      | 1761 | 0.9956 | 0.0185 | 0.5671 |
| 0.01     | E053 | 12_EnhBiv  | 207  | 0.9956 | 0.0022 | 0.5070 |
| 0.01     | E118 | 12_EnhBiv  | 433  | 0.9955 | 0.0046 | 0.5246 |
| 0.001    | E069 | 7_Enh      | 251  | 0.9955 | 0.0269 | 0.5124 |
| 0.01     | E018 | 2_TssAFlnk | 232  | 0.9954 | 0.0024 | 0.5108 |
| 0.01     | E096 | 6_EnhG     | 378  | 0.9952 | 0.0040 | 0.5238 |
| 0.01     | E049 | 2_TssAFlnk | 912  | 0.9951 | 0.0096 | 0.5501 |
| 0.01     | E040 | 6_EnhG     | 182  | 0.9950 | 0.0019 | 0.5071 |
| 0.01     | E069 | 7_Enh      | 2558 | 0.9950 | 0.0269 | 0.5955 |
| 0.001    | E094 | 7_Enh      | 149  | 0.9947 | 0.0160 | 0.5042 |
| 0.01     | E017 | 2_TssAFlnk | 293  | 0.9945 | 0.0031 | 0.5226 |
| 0.01     | E068 | 2_TssAFlnk | 465  | 0.9944 | 0.0049 | 0.5358 |
| 0.01     | E097 | 7_Enh      | 2443 | 0.9944 | 0.0257 | 0.6054 |
| 0.001    | E127 | 7_Enh      | 319  | 0.9941 | 0.0342 | 0.5280 |
| 0.01     | E015 | 2_TssAFlnk | 354  | 0.9940 | 0.0037 | 0.5310 |
| 0.001    | E041 | 7_Enh      | 263  | 0.9938 | 0.0282 | 0.5245 |
| 0.01     | E084 | 6_EnhG     | 362  | 0.9938 | 0.0038 | 0.5336 |
| 1.00E-04 | E030 | 7_Enh      | 27   | 0.9936 | 0.0259 | 0.4626 |
| 0.001    | E090 | 12_EnhBiv  | 63   | 0.9935 | 0.0068 | 0.4873 |
| 1.00E-04 | E074 | 7_Enh      | 31   | 0.9934 | 0.0297 | 0.4674 |
| 0.001    | E004 | 12_EnhBiv  | 4    | 0.9933 | 0.0004 | 0.3764 |
| 0.001    | E003 | 1_TssA     | 67   | 0.9933 | 0.0072 | 0.4896 |
| 0.01     | E032 | 2_TssAFlnk | 415  | 0.9933 | 0.0044 | 0.5417 |
| 0.01     | E014 | 12_EnhBiv  | 200  | 0.9931 | 0.0021 | 0.5206 |

|          |      |            |      |        |        |        |
|----------|------|------------|------|--------|--------|--------|
| 0.01     | E070 | 7_Enh      | 2075 | 0.9929 | 0.0218 | 0.6228 |
| 0.01     | E040 | 7_Enh      | 2448 | 0.9927 | 0.0258 | 0.6378 |
| 0.01     | E077 | 2_TssAFlnk | 631  | 0.9925 | 0.0066 | 0.5646 |
| 0.01     | E099 | 12_EnhBiv  | 101  | 0.9924 | 0.0011 | 0.5044 |
| 0.01     | E031 | 3_TxFlnk   | 41   | 0.9919 | 0.0004 | 0.4793 |
| 0.01     | E106 | 6_EnhG     | 196  | 0.9918 | 0.0021 | 0.5269 |
| 0.01     | E111 | 2_TssAFlnk | 867  | 0.9916 | 0.0091 | 0.5904 |
| 0.01     | E129 | 10_TssBiv  | 65   | 0.9912 | 0.0007 | 0.4955 |
| 0.01     | E116 | 3_TxFlnk   | 207  | 0.9909 | 0.0022 | 0.5344 |
| 0.01     | E053 | 2_TssAFlnk | 467  | 0.9907 | 0.0049 | 0.5683 |
| 0.001    | E074 | 6_EnhG     | 18   | 0.9906 | 0.0019 | 0.4537 |
| 1.00E-04 | E071 | 7_Enh      | 33   | 0.9906 | 0.0316 | 0.4760 |
| 0.001    | E006 | 6_EnhG     | 93   | 0.9905 | 0.0100 | 0.5095 |
| 0.01     | E046 | 6_EnhG     | 541  | 0.9904 | 0.0057 | 0.5782 |
| 0.01     | E109 | 7_Enh      | 1328 | 0.9900 | 0.0140 | 0.6368 |
| 0.01     | E091 | 12_EnhBiv  | 405  | 0.9900 | 0.0043 | 0.5675 |
| 1.00E-04 | E056 | 1_TssA     | 8    | 0.9899 | 0.0077 | 0.4188 |
| 0.01     | E123 | 12_EnhBiv  | 52   | 0.9896 | 0.0005 | 0.4933 |
| 0.01     | E045 | 7_Enh      | 1241 | 0.9894 | 0.0131 | 0.6411 |
| 0.01     | E031 | 2_TssAFlnk | 782  | 0.9892 | 0.0082 | 0.6108 |
| 0.01     | E074 | 7_Enh      | 2811 | 0.9890 | 0.0296 | 0.7197 |
| 1.00E-05 | E071 | 7_Enh      | 3    | 0.9887 | 0.0316 | 0.3606 |
| 0.001    | E114 | 6_EnhG     | 51   | 0.9882 | 0.0055 | 0.4969 |
| 0.01     | E054 | 2_TssAFlnk | 554  | 0.9881 | 0.0058 | 0.6007 |
| 0.01     | E089 | 7_Enh      | 2091 | 0.9879 | 0.0220 | 0.7083 |
| 0.01     | E125 | 7_Enh      | 2688 | 0.9879 | 0.0283 | 0.7356 |
| 0.01     | E067 | 7_Enh      | 2162 | 0.9878 | 0.0228 | 0.7145 |
| 0.001    | E002 | 1_TssA     | 71   | 0.9877 | 0.0076 | 0.5102 |
| 0.01     | E059 | 6_EnhG     | 401  | 0.9876 | 0.0042 | 0.5859 |
| 0.01     | E068 | 3_TxFlnk   | 19   | 0.9875 | 0.0002 | 0.4612 |
| 1.00E-04 | E106 | 7_Enh      | 18   | 0.9875 | 0.0173 | 0.4593 |
| 0.01     | E050 | 12_EnhBiv  | 200  | 0.9875 | 0.0021 | 0.5525 |
| 0.01     | E034 | 12_EnhBiv  | 487  | 0.9872 | 0.0051 | 0.6009 |
| 0.01     | E030 | 7_Enh      | 2443 | 0.9871 | 0.0257 | 0.7384 |
| 0.001    | E037 | 2_TssAFlnk | 45   | 0.9869 | 0.0048 | 0.4959 |
| 0.01     | E079 | 12_EnhBiv  | 65   | 0.9869 | 0.0007 | 0.5097 |
| 0.01     | E090 | 7_Enh      | 3935 | 0.9868 | 0.0414 | 0.7998 |
| 0.001    | E080 | 7_Enh      | 327  | 0.9857 | 0.0351 | 0.5908 |
| 0.01     | E012 | 10_TssBiv  | 234  | 0.9854 | 0.0025 | 0.5725 |
| 0.001    | E075 | 7_Enh      | 102  | 0.9852 | 0.0109 | 0.5341 |
| 0.01     | E103 | 2_TssAFlnk | 381  | 0.9852 | 0.0040 | 0.6018 |
| 0.01     | E123 | 7_Enh      | 2519 | 0.9852 | 0.0265 | 0.7729 |
| 0.01     | E119 | 11_BivFlnk | 48   | 0.9850 | 0.0005 | 0.5036 |

|          |      |            |      |        |        |        |
|----------|------|------------|------|--------|--------|--------|
| 0.01     | E115 | 2_TssAFlnk | 700  | 0.9845 | 0.0074 | 0.6518 |
| 0.01     | E053 | 7_Enh      | 3263 | 0.9843 | 0.0344 | 0.8185 |
| 0.001    | E120 | 6_EnhG     | 44   | 0.9842 | 0.0047 | 0.5025 |
| 0.01     | E037 | 7_Enh      | 2818 | 0.9839 | 0.0297 | 0.8057 |
| 0.01     | E123 | 6_EnhG     | 423  | 0.9839 | 0.0045 | 0.6189 |
| 0.01     | E051 | 2_TssAFlnk | 1395 | 0.9839 | 0.0147 | 0.7245 |
| 0.001    | E124 | 2_TssAFlnk | 137  | 0.9838 | 0.0147 | 0.5542 |
| 0.01     | E042 | 7_Enh      | 2129 | 0.9835 | 0.0224 | 0.7781 |
| 0.01     | E039 | 7_Enh      | 2469 | 0.9834 | 0.0260 | 0.7970 |
| 0.01     | E014 | 6_EnhG     | 126  | 0.9834 | 0.0013 | 0.5514 |
| 0.01     | E071 | 6_EnhG     | 281  | 0.9834 | 0.0030 | 0.5957 |
| 0.001    | E061 | 12_EnhBiv  | 14   | 0.9834 | 0.0015 | 0.4547 |
| 0.001    | E102 | 7_Enh      | 221  | 0.9831 | 0.0237 | 0.5841 |
| 0.001    | E110 | 6_EnhG     | 7    | 0.9831 | 0.0008 | 0.4192 |
| 0.01     | E054 | 7_Enh      | 2383 | 0.9829 | 0.0251 | 0.8001 |
| 0.01     | E110 | 12_EnhBiv  | 196  | 0.9826 | 0.0021 | 0.5791 |
| 0.001    | E036 | 7_Enh      | 294  | 0.9825 | 0.0316 | 0.6063 |
| 0.001    | E072 | 7_Enh      | 230  | 0.9824 | 0.0247 | 0.5910 |
| 0.01     | E073 | 7_Enh      | 1806 | 0.9823 | 0.0190 | 0.7749 |
| 1.00E-04 | E118 | 6_EnhG     | 6    | 0.9821 | 0.0058 | 0.4113 |
| 0.01     | E048 | 6_EnhG     | 160  | 0.9816 | 0.0017 | 0.5729 |
| 0.01     | E047 | 7_Enh      | 2590 | 0.9816 | 0.0273 | 0.8290 |
| 0.01     | E126 | 7_Enh      | 3717 | 0.9810 | 0.0391 | 0.8825 |
| 0.01     | E041 | 2_TssAFlnk | 766  | 0.9806 | 0.0081 | 0.6994 |
| 0.001    | E058 | 7_Enh      | 313  | 0.9799 | 0.0336 | 0.6287 |
| 0.001    | E056 | 10_TssBiv  | 13   | 0.9799 | 0.0014 | 0.4562 |
| 0.01     | E036 | 7_Enh      | 2989 | 0.9797 | 0.0315 | 0.8707 |
| 0.01     | E114 | 2_TssAFlnk | 733  | 0.9796 | 0.0077 | 0.7043 |
| 0.001    | E095 | 7_Enh      | 279  | 0.9793 | 0.0299 | 0.6239 |
| 0.01     | E057 | 2_TssAFlnk | 481  | 0.9790 | 0.0051 | 0.6697 |
| 0.01     | E030 | 12_EnhBiv  | 116  | 0.9788 | 0.0012 | 0.5677 |
| 0.001    | E050 | 1_TssA     | 24   | 0.9785 | 0.0026 | 0.4887 |
| 0.01     | E099 | 2_TssAFlnk | 116  | 0.9784 | 0.0012 | 0.5693 |
| 0.01     | E034 | 2_TssAFlnk | 480  | 0.9782 | 0.0051 | 0.6759 |
| 0.001    | E030 | 1_TssA     | 24   | 0.9779 | 0.0026 | 0.4899 |
| 1.00E-04 | E096 | 1_TssA     | 6    | 0.9779 | 0.0058 | 0.4156 |
| 0.01     | E085 | 6_EnhG     | 787  | 0.9777 | 0.0083 | 0.7309 |
| 0.01     | E107 | 7_Enh      | 2995 | 0.9775 | 0.0315 | 0.8957 |
| 0.01     | E031 | 7_Enh      | 2142 | 0.9770 | 0.0225 | 0.8597 |
| 0.01     | E061 | 1_TssA     | 505  | 0.9769 | 0.0053 | 0.6908 |
| 0.01     | E051 | 7_Enh      | 3205 | 0.9768 | 0.0337 | 0.9110 |
| 0.001    | E116 | 7_Enh      | 233  | 0.9766 | 0.0250 | 0.6272 |
| 0.001    | E055 | 6_EnhG     | 80   | 0.9766 | 0.0086 | 0.5555 |



|          |      |            |      |        |        |        |
|----------|------|------------|------|--------|--------|--------|
| 0.001    | E035 | 7_Enh      | 250  | 0.9760 | 0.0268 | 0.6366 |
| 0.01     | E009 | 12_EnhBiv  | 160  | 0.9759 | 0.0017 | 0.6015 |
| 0.001    | E070 | 7_Enh      | 200  | 0.9758 | 0.0215 | 0.6200 |
| 0.01     | E023 | 2_TssAFlnk | 829  | 0.9757 | 0.0087 | 0.7551 |
| 0.01     | E113 | 3_TxFlnk   | 19   | 0.9756 | 0.0002 | 0.4826 |
| 0.01     | E033 | 2_TssAFlnk | 639  | 0.9756 | 0.0067 | 0.7266 |
| 0.01     | E112 | 7_Enh      | 1311 | 0.9755 | 0.0138 | 0.8130 |
| 0.01     | E045 | 2_TssAFlnk | 379  | 0.9754 | 0.0040 | 0.6748 |
| 0.001    | E028 | 6_EnhG     | 32   | 0.9753 | 0.0034 | 0.5100 |
| 0.001    | E085 | 6_EnhG     | 77   | 0.9752 | 0.0083 | 0.5582 |
| 0.01     | E030 | 2_TssAFlnk | 847  | 0.9751 | 0.0089 | 0.7631 |
| 0.01     | E056 | 2_TssAFlnk | 453  | 0.9749 | 0.0048 | 0.6960 |
| 0.01     | E044 | 10_TssBiv  | 39   | 0.9745 | 0.0004 | 0.5222 |
| 0.01     | E026 | 2_TssAFlnk | 695  | 0.9745 | 0.0073 | 0.7458 |
| 0.01     | E092 | 7_Enh      | 2294 | 0.9745 | 0.0241 | 0.8933 |
| 0.01     | E071 | 2_TssAFlnk | 521  | 0.9744 | 0.0055 | 0.7145 |
| 0.01     | E108 | 12_EnhBiv  | 184  | 0.9737 | 0.0019 | 0.6237 |
| 0.01     | E123 | 3_TxFlnk   | 132  | 0.9735 | 0.0014 | 0.5998 |
| 0.001    | E016 | 1_TssA     | 72   | 0.9731 | 0.0077 | 0.5615 |
| 0.01     | E043 | 12_EnhBiv  | 138  | 0.9729 | 0.0015 | 0.6059 |
| 0.001    | E066 | 1_TssA     | 47   | 0.9725 | 0.0050 | 0.5383 |
| 0.01     | E050 | 7_Enh      | 3412 | 0.9724 | 0.0359 | 0.9516 |
| 0.001    | E101 | 1_TssA     | 91   | 0.9724 | 0.0098 | 0.5793 |
| 0.01     | E080 | 12_EnhBiv  | 648  | 0.9723 | 0.0068 | 0.7564 |
| 0.01     | E044 | 2_TssAFlnk | 627  | 0.9722 | 0.0066 | 0.7538 |
| 0.01     | E034 | 3_TxFlnk   | 46   | 0.9719 | 0.0005 | 0.5385 |
| 1.00E-04 | E029 | 7_Enh      | 39   | 0.9710 | 0.0374 | 0.5328 |
| 0.01     | E047 | 2_TssAFlnk | 396  | 0.9708 | 0.0042 | 0.7125 |
| 0.01     | E081 | 2_TssAFlnk | 243  | 0.9706 | 0.0026 | 0.6646 |
| 0.01     | E025 | 6_EnhG     | 499  | 0.9702 | 0.0053 | 0.7430 |
| 0.01     | E036 | 3_TxFlnk   | 79   | 0.9701 | 0.0008 | 0.5781 |
| 0.001    | E040 | 2_TssAFlnk | 43   | 0.9699 | 0.0046 | 0.5403 |
| 0.01     | E129 | 7_Enh      | 3170 | 0.9697 | 0.0334 | 0.9609 |
| 0.01     | E111 | 7_Enh      | 1667 | 0.9696 | 0.0175 | 0.8964 |
| 0.01     | E053 | 6_EnhG     | 256  | 0.9696 | 0.0027 | 0.6759 |
| 0.001    | E038 | 1_TssA     | 49   | 0.9695 | 0.0053 | 0.5493 |
| 0.01     | E057 | 6_EnhG     | 524  | 0.9695 | 0.0055 | 0.7539 |
| 0.01     | E104 | 7_Enh      | 2388 | 0.9695 | 0.0251 | 0.9370 |
| 0.01     | E119 | 2_TssAFlnk | 513  | 0.9694 | 0.0054 | 0.7518 |
| 0.01     | E101 | 2_TssAFlnk | 524  | 0.9692 | 0.0055 | 0.7556 |
| 0.01     | E114 | 6_EnhG     | 510  | 0.9692 | 0.0054 | 0.7525 |
| 0.01     | E107 | 2_TssAFlnk | 753  | 0.9691 | 0.0079 | 0.8010 |
| 0.01     | E076 | 2_TssAFlnk | 362  | 0.9688 | 0.0038 | 0.7164 |

|          |      |            |      |        |        |        |
|----------|------|------------|------|--------|--------|--------|
| 0.01     | E098 | 1_TssA     | 568  | 0.9681 | 0.0060 | 0.7739 |
| 0.01     | E118 | 2_TssAFlnk | 820  | 0.9680 | 0.0086 | 0.8206 |
| 0.01     | E010 | 6_EnhG     | 209  | 0.9677 | 0.0022 | 0.6669 |
| 0.01     | E003 | 6_EnhG     | 96   | 0.9675 | 0.0010 | 0.6018 |
| 0.001    | E102 | 2_TssAFlnk | 51   | 0.9674 | 0.0055 | 0.5579 |
| 0.01     | E122 | 7_Enh      | 2771 | 0.9674 | 0.0292 | 0.9615 |
| 0.001    | E116 | 11_BivFlnk | 3    | 0.9674 | 0.0003 | 0.3754 |
| 0.001    | E046 | 7_Enh      | 240  | 0.9673 | 0.0258 | 0.6853 |
| 0.01     | E025 | 7_Enh      | 4810 | 0.9672 | 0.0506 | 0.9913 |
| 0.001    | E095 | 10_TssBiv  | 4    | 0.9672 | 0.0004 | 0.3977 |
| 0.01     | E091 | 6_EnhG     | 454  | 0.9669 | 0.0048 | 0.7554 |
| 0.001    | E119 | 6_EnhG     | 26   | 0.9669 | 0.0028 | 0.5172 |
| 0.01     | E062 | 7_Enh      | 804  | 0.9667 | 0.0085 | 0.8279 |
| 0.001    | E048 | 1_TssA     | 48   | 0.9665 | 0.0052 | 0.5566 |
| 0.001    | E114 | 7_Enh      | 232  | 0.9662 | 0.0249 | 0.6878 |
| 0.001    | E082 | 1_TssA     | 71   | 0.9661 | 0.0076 | 0.5851 |
| 0.01     | E095 | 7_Enh      | 2806 | 0.9661 | 0.0295 | 0.9682 |
| 0.01     | E101 | 3_TxFlnk   | 45   | 0.9660 | 0.0005 | 0.5535 |
| 0.01     | E061 | 7_Enh      | 3346 | 0.9660 | 0.0352 | 0.9793 |
| 0.01     | E120 | 7_Enh      | 2574 | 0.9659 | 0.0271 | 0.9625 |
| 1.00E-04 | E016 | 1_TssA     | 8    | 0.9659 | 0.0077 | 0.4470 |
| 0.001    | E115 | 1_TssA     | 28   | 0.9659 | 0.0030 | 0.5240 |
| 0.001    | E051 | 1_TssA     | 28   | 0.9658 | 0.0030 | 0.5242 |
| 0.01     | E073 | 6_EnhG     | 200  | 0.9657 | 0.0021 | 0.6735 |
| 0.01     | E043 | 7_Enh      | 2521 | 0.9651 | 0.0265 | 0.9646 |
| 0.01     | E098 | 7_Enh      | 2618 | 0.9640 | 0.0276 | 0.9715 |
| 0.01     | E115 | 6_EnhG     | 444  | 0.9639 | 0.0047 | 0.7731 |
| 0.01     | E037 | 2_TssAFlnk | 448  | 0.9637 | 0.0047 | 0.7758 |
| 0.01     | E070 | 2_TssAFlnk | 396  | 0.9634 | 0.0042 | 0.7627 |
| 0.01     | E063 | 6_EnhG     | 362  | 0.9632 | 0.0038 | 0.7531 |
| 0.01     | E100 | 7_Enh      | 1979 | 0.9625 | 0.0208 | 0.9566 |
| 0.01     | E088 | 7_Enh      | 3436 | 0.9624 | 0.0362 | 0.9890 |
| 0.01     | E025 | 12_EnhBiv  | 123  | 0.9622 | 0.0013 | 0.6444 |
| 0.01     | E127 | 2_TssAFlnk | 671  | 0.9622 | 0.0071 | 0.8370 |
| 0.01     | E022 | 7_Enh      | 2654 | 0.9621 | 0.0279 | 0.9782 |
| 0.01     | E017 | 7_Enh      | 3129 | 0.9618 | 0.0329 | 0.9867 |
| 0.01     | E056 | 7_Enh      | 1830 | 0.9616 | 0.0193 | 0.9544 |
| 0.01     | E049 | 12_EnhBiv  | 81   | 0.9616 | 0.0009 | 0.6110 |
| 0.01     | E107 | 12_EnhBiv  | 345  | 0.9614 | 0.0036 | 0.7584 |
| 0.001    | E007 | 1_TssA     | 59   | 0.9611 | 0.0063 | 0.5878 |
| 0.01     | E053 | 11_BivFlnk | 110  | 0.9610 | 0.0012 | 0.6396 |
| 0.01     | E006 | 12_EnhBiv  | 203  | 0.9607 | 0.0021 | 0.7015 |
| 0.01     | E094 | 6_EnhG     | 298  | 0.9607 | 0.0031 | 0.7454 |

|          |      |            |      |        |        |        |
|----------|------|------------|------|--------|--------|--------|
| 0.01     | E038 | 7_Enh      | 2216 | 0.9606 | 0.0233 | 0.9721 |
| 0.01     | E038 | 6_EnhG     | 211  | 0.9605 | 0.0022 | 0.7072 |
| 0.01     | E011 | 2_TssAFlnk | 254  | 0.9603 | 0.0027 | 0.7287 |
| 0.01     | E010 | 7_Enh      | 2936 | 0.9599 | 0.0309 | 0.9880 |
| 0.01     | E076 | 7_Enh      | 2753 | 0.9598 | 0.0290 | 0.9857 |
| 0.01     | E039 | 6_EnhG     | 332  | 0.9597 | 0.0035 | 0.7643 |
| 0.001    | E069 | 11_BivFlnk | 4    | 0.9596 | 0.0004 | 0.4040 |
| 0.01     | E087 | 7_Enh      | 1202 | 0.9595 | 0.0127 | 0.9244 |
| 0.01     | E057 | 7_Enh      | 3019 | 0.9591 | 0.0318 | 0.9904 |
| 0.01     | E128 | 3_TxFlnk   | 64   | 0.9588 | 0.0007 | 0.6013 |
| 0.01     | E120 | 6_EnhG     | 437  | 0.9587 | 0.0046 | 0.8045 |
| 0.01     | E020 | 2_TssAFlnk | 378  | 0.9587 | 0.0040 | 0.7861 |
| 0.001    | E039 | 3_TxFlnk   | 15   | 0.9587 | 0.0016 | 0.4978 |
| 0.001    | E123 | 1_TssA     | 66   | 0.9587 | 0.0071 | 0.6045 |
| 0.01     | E091 | 7_Enh      | 3416 | 0.9585 | 0.0360 | 0.9943 |
| 0.001    | E024 | 11_BivFlnk | 9    | 0.9583 | 0.0010 | 0.4640 |
| 0.01     | E080 | 6_EnhG     | 672  | 0.9583 | 0.0071 | 0.8621 |
| 0.01     | E106 | 11_BivFlnk | 11   | 0.9582 | 0.0001 | 0.4778 |
| 0.01     | E092 | 6_EnhG     | 592  | 0.9580 | 0.0062 | 0.8478 |
| 0.01     | E128 | 7_Enh      | 2303 | 0.9577 | 0.0242 | 0.9822 |
| 0.001    | E097 | 2_TssAFlnk | 15   | 0.9577 | 0.0016 | 0.4995 |
| 1.00E-04 | E022 | 7_Enh      | 29   | 0.9575 | 0.0278 | 0.5464 |
| 0.01     | E113 | 7_Enh      | 2278 | 0.9573 | 0.0240 | 0.9826 |
| 0.01     | E034 | 7_Enh      | 2110 | 0.9572 | 0.0222 | 0.9791 |
| 0.01     | E118 | 7_Enh      | 3673 | 0.9571 | 0.0387 | 0.9967 |
| 0.001    | E113 | 1_TssA     | 39   | 0.9571 | 0.0042 | 0.5678 |
| 0.001    | E032 | 11_BivFlnk | 6    | 0.9570 | 0.0006 | 0.4369 |
| 0.01     | E088 | 2_TssAFlnk | 323  | 0.9570 | 0.0034 | 0.7762 |
| 0.01     | E041 | 7_Enh      | 2582 | 0.9569 | 0.0272 | 0.9885 |
| 0.01     | E066 | 10_TssBiv  | 5    | 0.9566 | 0.0001 | 0.4238 |
| 0.01     | E059 | 7_Enh      | 1679 | 0.9565 | 0.0177 | 0.9669 |
| 0.01     | E052 | 7_Enh      | 3298 | 0.9565 | 0.0347 | 0.9955 |
| 1.00E-05 | E026 | 7_Enh      | 3    | 0.9564 | 0.0316 | 0.3838 |
| 0.01     | E083 | 6_EnhG     | 108  | 0.9562 | 0.0011 | 0.6576 |
| 0.01     | E129 | 2_TssAFlnk | 683  | 0.9558 | 0.0072 | 0.8788 |
| 0.001    | E034 | 2_TssAFlnk | 46   | 0.9558 | 0.0049 | 0.5843 |
| 0.001    | E125 | 7_Enh      | 255  | 0.9555 | 0.0274 | 0.7586 |
| 0.01     | E068 | 7_Enh      | 2465 | 0.9553 | 0.0259 | 0.9895 |
| 0.001    | E076 | 2_TssAFlnk | 35   | 0.9550 | 0.0038 | 0.5649 |
| 0.01     | E103 | 7_Enh      | 1839 | 0.9548 | 0.0194 | 0.9775 |
| 0.01     | E009 | 7_Enh      | 2277 | 0.9547 | 0.0240 | 0.9876 |
| 1.00E-04 | E009 | 7_Enh      | 25   | 0.9547 | 0.0240 | 0.5418 |
| 1.00E-04 | E020 | 1_TssA     | 8    | 0.9542 | 0.0077 | 0.4611 |

|          |      |            |      |        |        |        |
|----------|------|------------|------|--------|--------|--------|
| 0.01     | E071 | 7_Enh      | 2894 | 0.9538 | 0.0305 | 0.9952 |
| 0.001    | E019 | 12_EnhBiv  | 24   | 0.9537 | 0.0026 | 0.5399 |
| 0.01     | E017 | 6_EnhG     | 825  | 0.9536 | 0.0087 | 0.9131 |
| 0.01     | E033 | 6_EnhG     | 349  | 0.9532 | 0.0037 | 0.8078 |
| 0.01     | E077 | 7_Enh      | 2100 | 0.9530 | 0.0221 | 0.9873 |
| 1.00E-05 | E057 | 7_Enh      | 3    | 0.9529 | 0.0316 | 0.3865 |
| 0.01     | E023 | 7_Enh      | 3625 | 0.9529 | 0.0382 | 0.9986 |
| 0.01     | E032 | 7_Enh      | 2732 | 0.9526 | 0.0288 | 0.9952 |
| 0.01     | E010 | 12_EnhBiv  | 170  | 0.9525 | 0.0018 | 0.7221 |
| 0.01     | E084 | 7_Enh      | 2902 | 0.9525 | 0.0305 | 0.9962 |
| 0.01     | E122 | 2_TssAFlnk | 632  | 0.9519 | 0.0067 | 0.8900 |
| 0.01     | E039 | 2_TssAFlnk | 609  | 0.9516 | 0.0064 | 0.8872 |
| 1.00E-04 | E124 | 7_Enh      | 25   | 0.9514 | 0.0240 | 0.5488 |
| 0.01     | E111 | 12_EnhBiv  | 136  | 0.9512 | 0.0014 | 0.7026 |
| 0.001    | E110 | 7_Enh      | 295  | 0.9512 | 0.0317 | 0.8004 |
| 0.01     | E019 | 12_EnhBiv  | 244  | 0.9510 | 0.0026 | 0.7737 |
| 0.01     | E038 | 2_TssAFlnk | 487  | 0.9508 | 0.0051 | 0.8633 |
| 0.01     | E085 | 12_EnhBiv  | 135  | 0.9502 | 0.0014 | 0.7062 |
| 0.01     | E011 | 12_EnhBiv  | 138  | 0.9502 | 0.0015 | 0.7089 |
| 0.01     | E096 | 7_Enh      | 1869 | 0.9498 | 0.0197 | 0.9878 |
| 0.001    | E117 | 7_Enh      | 236  | 0.9498 | 0.0253 | 0.7780 |
| 0.001    | E098 | 7_Enh      | 253  | 0.9498 | 0.0272 | 0.7873 |
| 0.001    | E033 | 2_TssAFlnk | 61   | 0.9495 | 0.0065 | 0.6274 |
| 1.00E-04 | E004 | 7_Enh      | 18   | 0.9493 | 0.0173 | 0.5278 |
| 0.01     | E108 | 7_Enh      | 3116 | 0.9490 | 0.0328 | 0.9986 |
| 0.01     | E111 | 3_TxFlnk   | 85   | 0.9490 | 0.0009 | 0.6613 |
| 0.001    | E042 | 3_TxFlnk   | 29   | 0.9486 | 0.0031 | 0.5654 |
| 0.01     | E002 | 7_Enh      | 1153 | 0.9486 | 0.0121 | 0.9641 |
| 0.01     | E119 | 7_Enh      | 3571 | 0.9485 | 0.0376 | 0.9994 |
| 0.01     | E125 | 2_TssAFlnk | 532  | 0.9480 | 0.0056 | 0.8883 |
| 0.01     | E028 | 7_Enh      | 3623 | 0.9479 | 0.0381 | 0.9995 |
| 0.01     | E102 | 7_Enh      | 2172 | 0.9477 | 0.0229 | 0.9945 |
| 0.01     | E026 | 7_Enh      | 2972 | 0.9476 | 0.0313 | 0.9986 |
| 1.00E-04 | E038 | 7_Enh      | 24   | 0.9475 | 0.0230 | 0.5538 |
| 0.01     | E041 | 6_EnhG     | 547  | 0.9475 | 0.0058 | 0.8942 |
| 1.00E-04 | E052 | 1_TssA     | 6    | 0.9471 | 0.0058 | 0.4475 |
| 0.01     | E046 | 12_EnhBiv  | 224  | 0.9471 | 0.0024 | 0.7818 |
| 0.01     | E044 | 7_Enh      | 1375 | 0.9468 | 0.0145 | 0.9795 |
| 0.01     | E058 | 3_TxFlnk   | 108  | 0.9466 | 0.0011 | 0.6958 |
| 0.01     | E124 | 7_Enh      | 2265 | 0.9464 | 0.0238 | 0.9961 |
| 0.001    | E054 | 2_TssAFlnk | 52   | 0.9456 | 0.0056 | 0.6244 |
| 0.01     | E127 | 7_Enh      | 3093 | 0.9454 | 0.0326 | 0.9993 |
| 0.01     | E012 | 7_Enh      | 2485 | 0.9451 | 0.0262 | 0.9979 |

|          |      |            |      |        |        |        |
|----------|------|------------|------|--------|--------|--------|
| 0.001    | E062 | 7_Enh      | 77   | 0.9440 | 0.0083 | 0.6694 |
| 0.001    | E056 | 2_TssAFlnk | 43   | 0.9435 | 0.0046 | 0.6124 |
| 0.001    | E026 | 2_TssAFlnk | 66   | 0.9435 | 0.0071 | 0.6546 |
| 0.001    | E055 | 10_TssBiv  | 9    | 0.9435 | 0.0010 | 0.4833 |
| 0.01     | E027 | 7_Enh      | 3969 | 0.9432 | 0.0418 | 0.9999 |
| 0.01     | E063 | 7_Enh      | 3111 | 0.9431 | 0.0328 | 0.9996 |
| 0.001    | E096 | 7_Enh      | 182  | 0.9430 | 0.0195 | 0.7760 |
| 0.001    | E073 | 7_Enh      | 170  | 0.9427 | 0.0182 | 0.7686 |
| 0.001    | E063 | 7_Enh      | 305  | 0.9426 | 0.0327 | 0.8467 |
| 1.00E-04 | E055 | 1_TssA     | 7    | 0.9423 | 0.0067 | 0.4651 |
| 0.01     | E090 | 12_EnhBiv  | 609  | 0.9420 | 0.0064 | 0.9291 |
| 0.01     | E083 | 7_Enh      | 4554 | 0.9416 | 0.0479 | 1.0000 |
| 1.00E-04 | E043 | 7_Enh      | 27   | 0.9414 | 0.0259 | 0.5773 |
| 0.01     | E024 | 7_Enh      | 3237 | 0.9413 | 0.0341 | 0.9998 |
| 1.00E-04 | E128 | 1_TssA     | 8    | 0.9412 | 0.0077 | 0.4771 |
| 0.01     | E027 | 6_EnhG     | 615  | 0.9407 | 0.0065 | 0.9346 |
| 0.01     | E013 | 2_TssAFlnk | 85   | 0.9405 | 0.0009 | 0.6914 |
| 0.01     | E078 | 10_TssBiv  | 140  | 0.9401 | 0.0015 | 0.7527 |
| 0.01     | E029 | 7_Enh      | 3439 | 0.9401 | 0.0362 | 0.9999 |
| 1.00E-04 | E022 | 1_TssA     | 6    | 0.9393 | 0.0058 | 0.4559 |
| 0.01     | E048 | 3_TxFlnk   | 20   | 0.9393 | 0.0002 | 0.5542 |
| 1.00E-04 | E098 | 7_Enh      | 28   | 0.9390 | 0.0268 | 0.5861 |
| 0.01     | E126 | 2_TssAFlnk | 386  | 0.9389 | 0.0041 | 0.8891 |
| 0.001    | E106 | 10_TssBiv  | 3    | 0.9388 | 0.0003 | 0.3965 |
| 0.001    | E004 | 7_Enh      | 159  | 0.9387 | 0.0171 | 0.7766 |
| 0.01     | E033 | 7_Enh      | 1868 | 0.9387 | 0.0197 | 0.9973 |
| 0.001    | E051 | 11_BivFlnk | 21   | 0.9387 | 0.0023 | 0.5597 |
| 0.01     | E056 | 6_EnhG     | 630  | 0.9385 | 0.0066 | 0.9439 |
| 0.01     | E095 | 6_EnhG     | 382  | 0.9385 | 0.0040 | 0.8894 |
| 0.01     | E090 | 6_EnhG     | 784  | 0.9384 | 0.0083 | 0.9628 |
| 0.001    | E090 | 7_Enh      | 367  | 0.9384 | 0.0394 | 0.8894 |
| 0.001    | E020 | 10_TssBiv  | 34   | 0.9382 | 0.0036 | 0.6042 |
| 0.001    | E086 | 10_TssBiv  | 7    | 0.9378 | 0.0008 | 0.4702 |
| 0.01     | E035 | 7_Enh      | 2449 | 0.9377 | 0.0258 | 0.9994 |
| 1.00E-04 | E045 | 2_TssAFlnk | 4    | 0.9376 | 0.0038 | 0.4231 |
| 0.001    | E009 | 1_TssA     | 58   | 0.9374 | 0.0062 | 0.6603 |
| 0.01     | E049 | 7_Enh      | 3399 | 0.9372 | 0.0358 | 0.9999 |
| 0.01     | E078 | 7_Enh      | 1566 | 0.9372 | 0.0165 | 0.9954 |
| 0.01     | E021 | 2_TssAFlnk | 48   | 0.9371 | 0.0005 | 0.6406 |
| 0.01     | E013 | 7_Enh      | 2525 | 0.9371 | 0.0266 | 0.9996 |
| 0.01     | E101 | 7_Enh      | 1270 | 0.9370 | 0.0134 | 0.9904 |
| 0.01     | E105 | 7_Enh      | 2129 | 0.9368 | 0.0224 | 0.9989 |
| 0.01     | E072 | 6_EnhG     | 251  | 0.9366 | 0.0026 | 0.8435 |

|          |      |            |      |        |        |        |
|----------|------|------------|------|--------|--------|--------|
| 1.00E-04 | E013 | 1_TssA     | 8    | 0.9366 | 0.0077 | 0.4830 |
| 0.001    | E023 | 2_TssAFlnk | 78   | 0.9360 | 0.0084 | 0.6981 |
| 0.01     | E121 | 7_Enh      | 2705 | 0.9356 | 0.0285 | 0.9998 |
| 0.01     | E093 | 2_TssAFlnk | 331  | 0.9355 | 0.0035 | 0.8835 |
| 0.01     | E127 | 3_TxFlnk   | 96   | 0.9347 | 0.0010 | 0.7266 |
| 0.001    | E119 | 7_Enh      | 345  | 0.9343 | 0.0370 | 0.8974 |
| 0.001    | E122 | 1_TssA     | 39   | 0.9343 | 0.0042 | 0.6275 |
| 0.01     | E089 | 2_TssAFlnk | 235  | 0.9339 | 0.0025 | 0.8457 |
| 0.01     | E022 | 12_EnhBiv  | 147  | 0.9339 | 0.0015 | 0.7838 |
| 0.01     | E006 | 6_EnhG     | 894  | 0.9339 | 0.0094 | 0.9802 |
| 0.01     | E074 | 6_EnhG     | 173  | 0.9338 | 0.0018 | 0.8056 |
| 0.01     | E022 | 2_TssAFlnk | 203  | 0.9336 | 0.0021 | 0.8276 |
| 0.01     | E044 | 12_EnhBiv  | 83   | 0.9331 | 0.0009 | 0.7145 |
| 0.01     | E020 | 7_Enh      | 2365 | 0.9328 | 0.0249 | 0.9997 |
| 1.00E-04 | E041 | 2_TssAFlnk | 8    | 0.9327 | 0.0077 | 0.4878 |
| 0.01     | E049 | 6_EnhG     | 389  | 0.9324 | 0.0041 | 0.9139 |
| 0.01     | E119 | 12_EnhBiv  | 53   | 0.9324 | 0.0006 | 0.6648 |
| 0.01     | E077 | 12_EnhBiv  | 82   | 0.9324 | 0.0009 | 0.7154 |
| 0.001    | E074 | 1_TssA     | 70   | 0.9323 | 0.0075 | 0.6975 |
| 0.001    | E100 | 7_Enh      | 188  | 0.9323 | 0.0202 | 0.8252 |
| 0.01     | E059 | 10_TssBiv  | 59   | 0.9321 | 0.0006 | 0.6777 |
| 0.001    | E115 | 2_TssAFlnk | 65   | 0.9321 | 0.0070 | 0.6895 |
| 0.01     | E027 | 12_EnhBiv  | 125  | 0.9320 | 0.0013 | 0.7700 |
| 0.01     | E003 | 2_TssAFlnk | 142  | 0.9316 | 0.0015 | 0.7883 |
| 0.01     | E066 | 7_Enh      | 3039 | 0.9315 | 0.0320 | 1.0000 |
| 0.01     | E069 | 2_TssAFlnk | 390  | 0.9313 | 0.0041 | 0.9180 |
| 0.01     | E011 | 7_Enh      | 2587 | 0.9309 | 0.0272 | 0.9999 |
| 0.01     | E093 | 6_EnhG     | 499  | 0.9308 | 0.0053 | 0.9448 |
| 0.01     | E113 | 6_EnhG     | 553  | 0.9308 | 0.0058 | 0.9540 |
| 0.01     | E012 | 12_EnhBiv  | 212  | 0.9306 | 0.0022 | 0.8450 |
| 0.01     | E005 | 7_Enh      | 2699 | 0.9304 | 0.0284 | 0.9999 |
| 0.01     | E059 | 12_EnhBiv  | 216  | 0.9297 | 0.0023 | 0.8511 |
| 0.01     | E128 | 2_TssAFlnk | 295  | 0.9293 | 0.0031 | 0.8923 |
| 1.00E-04 | E049 | 7_Enh      | 37   | 0.9292 | 0.0355 | 0.6381 |
| 0.001    | E103 | 1_TssA     | 84   | 0.9291 | 0.0090 | 0.7303 |
| 0.01     | E118 | 6_EnhG     | 517  | 0.9291 | 0.0054 | 0.9524 |
| 0.001    | E074 | 7_Enh      | 259  | 0.9291 | 0.0278 | 0.8801 |
| 0.01     | E099 | 7_Enh      | 1914 | 0.9288 | 0.0201 | 0.9995 |
| 0.01     | E076 | 12_EnhBiv  | 36   | 0.9286 | 0.0004 | 0.6334 |
| 0.01     | E058 | 7_Enh      | 3023 | 0.9283 | 0.0318 | 1.0000 |
| 0.01     | E022 | 6_EnhG     | 731  | 0.9281 | 0.0077 | 0.9786 |
| 1.00E-04 | E034 | 2_TssAFlnk | 5    | 0.9280 | 0.0048 | 0.4520 |
| 0.001    | E055 | 7_Enh      | 276  | 0.9274 | 0.0296 | 0.8943 |

|          |      |            |      |        |        |        |
|----------|------|------------|------|--------|--------|--------|
| 0.001    | E006 | 2_TssAFlnk | 20   | 0.9271 | 0.0021 | 0.5781 |
| 0.01     | E018 | 3_TxFlnk   | 26   | 0.9270 | 0.0003 | 0.6037 |
| 1.00E-04 | E094 | 1_TssA     | 6    | 0.9270 | 0.0058 | 0.4694 |
| 0.001    | E050 | 7_Enh      | 319  | 0.9269 | 0.0342 | 0.9133 |
| 0.001    | E126 | 1_TssA     | 70   | 0.9269 | 0.0075 | 0.7148 |
| 0.001    | E092 | 7_Enh      | 214  | 0.9269 | 0.0230 | 0.8631 |
| 0.01     | E013 | 3_TxFlnk   | 57   | 0.9268 | 0.0006 | 0.6896 |
| 0.001    | E045 | 1_TssA     | 53   | 0.9268 | 0.0057 | 0.6817 |
| 0.001    | E010 | 7_Enh      | 278  | 0.9267 | 0.0298 | 0.8975 |
| 0.001    | E088 | 10_TssBiv  | 5    | 0.9266 | 0.0005 | 0.4532 |
| 0.001    | E090 | 1_TssA     | 42   | 0.9262 | 0.0045 | 0.6566 |
| 0.01     | E014 | 7_Enh      | 2992 | 0.9262 | 0.0315 | 1.0000 |
| 0.001    | E094 | 2_TssAFlnk | 9    | 0.9262 | 0.0010 | 0.5063 |
| 0.01     | E051 | 6_EnhG     | 333  | 0.9261 | 0.0035 | 0.9172 |
| 0.001    | E108 | 2_TssAFlnk | 70   | 0.9260 | 0.0075 | 0.7176 |
| 0.01     | E015 | 11_BivFlnk | 143  | 0.9259 | 0.0015 | 0.8103 |
| 1.00E-04 | E057 | 7_Enh      | 32   | 0.9258 | 0.0307 | 0.6305 |
| 0.01     | E077 | 6_EnhG     | 255  | 0.9256 | 0.0027 | 0.8871 |
| 1.00E-04 | E042 | 7_Enh      | 22   | 0.9256 | 0.0211 | 0.5918 |
| 0.001    | E035 | 2_TssAFlnk | 66   | 0.9252 | 0.0071 | 0.7129 |
| 0.01     | E116 | 2_TssAFlnk | 1011 | 0.9252 | 0.0106 | 0.9938 |
| 0.01     | E116 | 7_Enh      | 2250 | 0.9250 | 0.0237 | 0.9999 |
| 0.01     | E070 | 12_EnhBiv  | 102  | 0.9250 | 0.0011 | 0.7685 |
| 0.001    | E005 | 1_TssA     | 42   | 0.9247 | 0.0045 | 0.6606 |
| 0.01     | E058 | 6_EnhG     | 571  | 0.9246 | 0.0060 | 0.9696 |
| 1.00E-04 | E051 | 1_TssA     | 3    | 0.9244 | 0.0029 | 0.4077 |
| 0.01     | E085 | 7_Enh      | 2555 | 0.9241 | 0.0269 | 1.0000 |
| 0.001    | E039 | 2_TssAFlnk | 58   | 0.9240 | 0.0062 | 0.7005 |
| 0.01     | E088 | 12_EnhBiv  | 174  | 0.9239 | 0.0018 | 0.8437 |
| 0.01     | E118 | 11_BivFlnk | 202  | 0.9236 | 0.0021 | 0.8644 |
| 0.001    | E051 | 7_Enh      | 297  | 0.9229 | 0.0319 | 0.9175 |
| 0.01     | E017 | 12_EnhBiv  | 192  | 0.9227 | 0.0020 | 0.8608 |
| 0.01     | E092 | 2_TssAFlnk | 187  | 0.9224 | 0.0020 | 0.8584 |
| 0.001    | E103 | 6_EnhG     | 10   | 0.9223 | 0.0011 | 0.5212 |
| 0.01     | E093 | 7_Enh      | 2559 | 0.9222 | 0.0269 | 1.0000 |
| 0.001    | E091 | 12_EnhBiv  | 37   | 0.9221 | 0.0040 | 0.6530 |
| 0.001    | E120 | 7_Enh      | 241  | 0.9221 | 0.0259 | 0.8948 |
| 0.01     | E028 | 10_TssBiv  | 25   | 0.9219 | 0.0003 | 0.6108 |
| 0.01     | E019 | 11_BivFlnk | 134  | 0.9213 | 0.0014 | 0.8175 |
| 0.01     | E013 | 6_EnhG     | 381  | 0.9212 | 0.0040 | 0.9444 |
| 0.001    | E127 | 2_TssAFlnk | 63   | 0.9211 | 0.0068 | 0.7195 |
| 0.01     | E058 | 12_EnhBiv  | 133  | 0.9210 | 0.0014 | 0.8175 |
| 0.01     | E001 | 6_EnhG     | 69   | 0.9209 | 0.0007 | 0.7309 |

|          |      |            |      |        |        |        |
|----------|------|------------|------|--------|--------|--------|
| 0.01     | E106 | 10_TssBiv  | 30   | 0.9208 | 0.0003 | 0.6326 |
| 0.01     | E094 | 7_Enh      | 1406 | 0.9207 | 0.0148 | 0.9992 |
| 0.001    | E033 | 1_TssA     | 46   | 0.9204 | 0.0049 | 0.6827 |
| 0.001    | E057 | 7_Enh      | 284  | 0.9198 | 0.0305 | 0.9211 |
| 1.00E-05 | E066 | 7_Enh      | 3    | 0.9195 | 0.0316 | 0.4124 |
| 0.001    | E013 | 7_Enh      | 243  | 0.9195 | 0.0261 | 0.9039 |
| 0.001    | E017 | 7_Enh      | 293  | 0.9183 | 0.0314 | 0.9289 |
| 1.00E-05 | E129 | 7_Enh      | 3    | 0.9176 | 0.0316 | 0.4139 |
| 0.001    | E070 | 11_BivFlnk | 13   | 0.9176 | 0.0014 | 0.5533 |
| 0.001    | E126 | 2_TssAFlnk | 37   | 0.9176 | 0.0040 | 0.6644 |
| 0.01     | E001 | 7_Enh      | 3148 | 0.9168 | 0.0331 | 1.0000 |
| 0.001    | E080 | 2_TssAFlnk | 29   | 0.9165 | 0.0031 | 0.6390 |
| 0.001    | E044 | 6_EnhG     | 34   | 0.9162 | 0.0036 | 0.6580 |
| 0.01     | E122 | 10_TssBiv  | 23   | 0.9160 | 0.0002 | 0.6143 |
| 0.01     | E106 | 7_Enh      | 1520 | 0.9156 | 0.0160 | 0.9998 |
| 0.01     | E039 | 12_EnhBiv  | 77   | 0.9155 | 0.0008 | 0.7619 |
| 0.01     | E003 | 7_Enh      | 2529 | 0.9155 | 0.0266 | 1.0000 |
| 0.01     | E079 | 7_Enh      | 1555 | 0.9153 | 0.0164 | 0.9998 |
| 0.01     | E046 | 7_Enh      | 2315 | 0.9151 | 0.0244 | 1.0000 |
| 0.01     | E067 | 6_EnhG     | 144  | 0.9150 | 0.0015 | 0.8480 |
| 0.001    | E126 | 7_Enh      | 340  | 0.9149 | 0.0365 | 0.9519 |
| 0.001    | E047 | 1_TssA     | 41   | 0.9144 | 0.0044 | 0.6848 |
| 0.001    | E077 | 2_TssAFlnk | 57   | 0.9141 | 0.0061 | 0.7270 |
| 0.001    | E088 | 7_Enh      | 320  | 0.9138 | 0.0343 | 0.9485 |
| 0.01     | E029 | 2_TssAFlnk | 390  | 0.9135 | 0.0041 | 0.9629 |
| 0.01     | E105 | 6_EnhG     | 323  | 0.9131 | 0.0034 | 0.9479 |
| 1.00E-04 | E099 | 1_TssA     | 5    | 0.9130 | 0.0048 | 0.4673 |
| 1.00E-04 | E013 | 7_Enh      | 27   | 0.9126 | 0.0259 | 0.6419 |
| 0.001    | E029 | 1_TssA     | 29   | 0.9123 | 0.0031 | 0.6485 |
| 0.001    | E016 | 10_TssBiv  | 33   | 0.9123 | 0.0035 | 0.6639 |
| 0.001    | E040 | 12_EnhBiv  | 12   | 0.9118 | 0.0013 | 0.5546 |
| 1.00E-04 | E056 | 3_TxFlnk   | 4    | 0.9117 | 0.0038 | 0.4465 |
| 0.01     | E121 | 6_EnhG     | 189  | 0.9116 | 0.0020 | 0.8935 |
| 0.01     | E089 | 6_EnhG     | 619  | 0.9114 | 0.0065 | 0.9900 |
| 0.001    | E085 | 3_TxFlnk   | 8    | 0.9114 | 0.0009 | 0.5148 |
| 0.01     | E014 | 11_BivFlnk | 93   | 0.9108 | 0.0010 | 0.8018 |
| 0.001    | E129 | 7_Enh      | 292  | 0.9107 | 0.0313 | 0.9467 |
| 0.001    | E009 | 7_Enh      | 213  | 0.9105 | 0.0229 | 0.9134 |
| 0.01     | E127 | 6_EnhG     | 410  | 0.9105 | 0.0043 | 0.9714 |
| 0.01     | E045 | 6_EnhG     | 121  | 0.9104 | 0.0013 | 0.8389 |
| 0.01     | E065 | 7_Enh      | 864  | 0.9100 | 0.0091 | 0.9975 |
| 0.001    | E108 | 7_Enh      | 293  | 0.9098 | 0.0314 | 0.9488 |
| 0.001    | E061 | 7_Enh      | 309  | 0.9095 | 0.0332 | 0.9542 |



|          |      |            |      |        |        |        |
|----------|------|------------|------|--------|--------|--------|
| 0.001    | E009 | 11_BivFlnk | 4    | 0.9095 | 0.0004 | 0.4484 |
| 0.01     | E124 | 2_TssAFlnk | 1291 | 0.9093 | 0.0136 | 0.9997 |
| 0.01     | E093 | 10_TssBiv  | 55   | 0.9090 | 0.0006 | 0.7362 |
| 0.01     | E016 | 7_Enh      | 2862 | 0.9087 | 0.0301 | 1.0000 |
| 0.001    | E125 | 2_TssAFlnk | 50   | 0.9084 | 0.0054 | 0.7258 |
| 0.001    | E068 | 1_TssA     | 86   | 0.9084 | 0.0092 | 0.7994 |
| 1.00E-04 | E123 | 1_TssA     | 7    | 0.9083 | 0.0067 | 0.5058 |
| 0.01     | E050 | 6_EnhG     | 276  | 0.9081 | 0.0029 | 0.9443 |
| 1.00E-04 | E057 | 1_TssA     | 6    | 0.9080 | 0.0058 | 0.4907 |
| 0.01     | E008 | 7_Enh      | 1423 | 0.9076 | 0.0150 | 0.9999 |
| 0.001    | E055 | 3_TxFlnk   | 25   | 0.9076 | 0.0027 | 0.6418 |
| 0.001    | E071 | 10_TssBiv  | 9    | 0.9075 | 0.0010 | 0.5318 |
| 0.01     | E018 | 7_Enh      | 2819 | 0.9070 | 0.0297 | 1.0000 |
| 0.001    | E091 | 7_Enh      | 317  | 0.9069 | 0.0340 | 0.9612 |
| 0.01     | E014 | 3_TxFlnk   | 43   | 0.9065 | 0.0005 | 0.7107 |
| 0.001    | E059 | 7_Enh      | 156  | 0.9061 | 0.0167 | 0.8871 |
| 0.001    | E127 | 6_EnhG     | 40   | 0.9057 | 0.0043 | 0.7039 |
| 0.001    | E088 | 1_TssA     | 49   | 0.9051 | 0.0053 | 0.7318 |
| 0.01     | E004 | 7_Enh      | 1563 | 0.9051 | 0.0165 | 1.0000 |
| 1.00E-05 | E053 | 7_Enh      | 3    | 0.9049 | 0.0316 | 0.4243 |
| 0.01     | E078 | 6_EnhG     | 139  | 0.9049 | 0.0015 | 0.8736 |
| 0.01     | E096 | 10_TssBiv  | 5    | 0.9048 | 0.0001 | 0.4755 |
| 0.001    | E004 | 1_TssA     | 57   | 0.9045 | 0.0061 | 0.7539 |
| 0.001    | E027 | 6_EnhG     | 58   | 0.9045 | 0.0062 | 0.7563 |
| 0.01     | E069 | 12_EnhBiv  | 57   | 0.9045 | 0.0006 | 0.7533 |
| 0.001    | E055 | 1_TssA     | 60   | 0.9042 | 0.0064 | 0.7617 |
| 0.001    | E027 | 7_Enh      | 373  | 0.9037 | 0.0400 | 0.9772 |
| 0.01     | E112 | 3_TxFlnk   | 39   | 0.9034 | 0.0004 | 0.7059 |
| 0.001    | E128 | 12_EnhBiv  | 3    | 0.9033 | 0.0003 | 0.4244 |
| 0.01     | E015 | 7_Enh      | 3062 | 0.9032 | 0.0322 | 1.0000 |
| 0.01     | E035 | 6_EnhG     | 127  | 0.9015 | 0.0013 | 0.8712 |
| 0.01     | E020 | 6_EnhG     | 109  | 0.9010 | 0.0011 | 0.8522 |
| 0.001    | E089 | 7_Enh      | 187  | 0.9008 | 0.0201 | 0.9225 |
| 0.001    | E054 | 1_TssA     | 59   | 0.9005 | 0.0063 | 0.7696 |
| 0.01     | E028 | 6_EnhG     | 301  | 0.8998 | 0.0032 | 0.9663 |
| 0.01     | E042 | 1_TssA     | 241  | 0.8996 | 0.0025 | 0.9487 |
| 0.01     | E102 | 3_TxFlnk   | 21   | 0.8996 | 0.0002 | 0.6375 |
| 1.00E-04 | E011 | 1_TssA     | 9    | 0.8995 | 0.0086 | 0.5434 |
| 0.001    | E094 | 1_TssA     | 52   | 0.8994 | 0.0056 | 0.7551 |
| 0.01     | E005 | 12_EnhBiv  | 91   | 0.8992 | 0.0010 | 0.8325 |
| 0.01     | E011 | 11_BivFlnk | 36   | 0.8991 | 0.0004 | 0.7059 |
| 0.001    | E017 | 1_TssA     | 54   | 0.8990 | 0.0058 | 0.7613 |
| 0.01     | E116 | 6_EnhG     | 360  | 0.8989 | 0.0038 | 0.9787 |

|          |      |            |      |        |        |        |
|----------|------|------------|------|--------|--------|--------|
| 0.001    | E051 | 2_TssAFlnk | 125  | 0.8988 | 0.0134 | 0.8779 |
| 0.001    | E011 | 7_Enh      | 245  | 0.8988 | 0.0263 | 0.9538 |
| 0.01     | E077 | 10_TssBiv  | 78   | 0.8986 | 0.0008 | 0.8128 |
| 1.00E-04 | E116 | 7_Enh      | 24   | 0.8986 | 0.0230 | 0.6581 |
| 1.00E-04 | E103 | 7_Enh      | 19   | 0.8984 | 0.0182 | 0.6297 |
| 0.01     | E061 | 6_EnhG     | 552  | 0.8975 | 0.0058 | 0.9949 |
| 0.001    | E119 | 12_EnhBiv  | 5    | 0.8968 | 0.0005 | 0.4840 |
| 0.01     | E005 | 6_EnhG     | 450  | 0.8968 | 0.0047 | 0.9901 |
| 0.001    | E049 | 1_TssA     | 50   | 0.8966 | 0.0054 | 0.7570 |
| 1.00E-04 | E109 | 1_TssA     | 5    | 0.8965 | 0.0048 | 0.4846 |
| 0.001    | E072 | 12_EnhBiv  | 4    | 0.8963 | 0.0004 | 0.4609 |
| 0.01     | E054 | 12_EnhBiv  | 66   | 0.8959 | 0.0007 | 0.7966 |
| 0.01     | E111 | 6_EnhG     | 343  | 0.8957 | 0.0036 | 0.9796 |
| 0.01     | E021 | 7_Enh      | 1322 | 0.8955 | 0.0139 | 1.0000 |
| 0.001    | E011 | 1_TssA     | 80   | 0.8950 | 0.0086 | 0.8270 |
| 0.01     | E019 | 7_Enh      | 2911 | 0.8949 | 0.0306 | 1.0000 |
| 0.01     | E003 | 12_EnhBiv  | 258  | 0.8945 | 0.0027 | 0.9630 |
| 0.001    | E034 | 6_EnhG     | 60   | 0.8945 | 0.0064 | 0.7879 |
| 1.00E-04 | E062 | 2_TssAFlnk | 5    | 0.8942 | 0.0048 | 0.4870 |
| 0.001    | E086 | 12_EnhBiv  | 4    | 0.8940 | 0.0004 | 0.4631 |
| 0.01     | E075 | 7_Enh      | 943  | 0.8934 | 0.0099 | 0.9998 |
| 0.01     | E116 | 12_EnhBiv  | 44   | 0.8933 | 0.0005 | 0.7469 |
| 0.001    | E084 | 1_TssA     | 56   | 0.8932 | 0.0060 | 0.7814 |
| 1.00E-04 | E047 | 2_TssAFlnk | 4    | 0.8931 | 0.0038 | 0.4641 |
| 0.001    | E113 | 6_EnhG     | 52   | 0.8923 | 0.0056 | 0.7733 |
| 1.00E-04 | E017 | 1_TssA     | 6    | 0.8923 | 0.0058 | 0.5088 |
| 0.001    | E076 | 7_Enh      | 251  | 0.8922 | 0.0269 | 0.9663 |
| 0.01     | E015 | 6_EnhG     | 171  | 0.8922 | 0.0018 | 0.9296 |
| 0.001    | E089 | 2_TssAFlnk | 22   | 0.8914 | 0.0024 | 0.6598 |
| 0.01     | E055 | 6_EnhG     | 744  | 0.8908 | 0.0078 | 0.9993 |
| 0.01     | E051 | 10_TssBiv  | 17   | 0.8905 | 0.0002 | 0.6294 |
| 1.00E-04 | E037 | 7_Enh      | 28   | 0.8904 | 0.0268 | 0.6960 |
| 0.001    | E023 | 1_TssA     | 74   | 0.8895 | 0.0079 | 0.8306 |
| 0.01     | E105 | 11_BivFlnk | 29   | 0.8893 | 0.0003 | 0.6999 |
| 0.001    | E055 | 2_TssAFlnk | 58   | 0.8892 | 0.0062 | 0.7968 |
| 0.001    | E025 | 1_TssA     | 79   | 0.8889 | 0.0085 | 0.8413 |
| 0.01     | E028 | 3_TxFlnk   | 13   | 0.8884 | 0.0001 | 0.6009 |
| 0.001    | E028 | 7_Enh      | 333  | 0.8883 | 0.0357 | 0.9866 |
| 0.01     | E032 | 6_EnhG     | 553  | 0.8882 | 0.0058 | 0.9976 |
| 0.001    | E079 | 7_Enh      | 148  | 0.8881 | 0.0159 | 0.9239 |
| 0.001    | E015 | 10_TssBiv  | 28   | 0.8881 | 0.0030 | 0.6981 |
| 0.01     | E102 | 6_EnhG     | 165  | 0.8878 | 0.0017 | 0.9345 |
| 0.01     | E054 | 3_TxFlnk   | 23   | 0.8873 | 0.0002 | 0.6735 |

|          |      |            |     |        |        |        |
|----------|------|------------|-----|--------|--------|--------|
| 1.00E-05 | E080 | 7_Enh      | 3   | 0.8869 | 0.0316 | 0.4394 |
| 0.01     | E009 | 6_EnhG     | 167 | 0.8868 | 0.0018 | 0.9377 |
| 0.001    | E056 | 1_TssA     | 64  | 0.8866 | 0.0069 | 0.8174 |
| 0.001    | E025 | 2_TssAFlnk | 64  | 0.8864 | 0.0069 | 0.8177 |
| 1.00E-04 | E023 | 7_Enh      | 37  | 0.8858 | 0.0355 | 0.7458 |
| 0.001    | E065 | 1_TssA     | 73  | 0.8855 | 0.0078 | 0.8386 |
| 0.001    | E121 | 7_Enh      | 251 | 0.8852 | 0.0269 | 0.9751 |
| 0.001    | E067 | 7_Enh      | 190 | 0.8850 | 0.0204 | 0.9546 |
| 0.01     | E031 | 12_EnhBiv  | 79  | 0.8849 | 0.0008 | 0.8500 |
| 1.00E-05 | E015 | 7_Enh      | 3   | 0.8848 | 0.0316 | 0.4411 |
| 0.001    | E008 | 1_TssA     | 85  | 0.8846 | 0.0091 | 0.8620 |
| 0.001    | E092 | 12_EnhBiv  | 49  | 0.8841 | 0.0053 | 0.7854 |
| 0.01     | E019 | 6_EnhG     | 79  | 0.8837 | 0.0008 | 0.8531 |
| 0.001    | E029 | 2_TssAFlnk | 37  | 0.8836 | 0.0040 | 0.7466 |
| 0.01     | E101 | 6_EnhG     | 154 | 0.8823 | 0.0016 | 0.9377 |
| 0.01     | E048 | 2_TssAFlnk | 389 | 0.8813 | 0.0041 | 0.9941 |
| 1.00E-04 | E036 | 6_EnhG     | 5   | 0.8808 | 0.0048 | 0.5014 |
| 0.001    | E107 | 12_EnhBiv  | 31  | 0.8808 | 0.0033 | 0.7281 |
| 0.01     | E054 | 10_TssBiv  | 34  | 0.8804 | 0.0004 | 0.7414 |
| 1.00E-04 | E015 | 1_TssA     | 8   | 0.8804 | 0.0077 | 0.5564 |
| 0.001    | E125 | 1_TssA     | 50  | 0.8801 | 0.0054 | 0.7979 |
| 0.01     | E016 | 6_EnhG     | 115 | 0.8799 | 0.0012 | 0.9102 |
| 1.00E-04 | E102 | 1_TssA     | 6   | 0.8796 | 0.0058 | 0.5237 |
| 0.001    | E039 | 1_TssA     | 32  | 0.8793 | 0.0034 | 0.7357 |
| 0.001    | E001 | 1_TssA     | 81  | 0.8790 | 0.0087 | 0.8685 |
| 0.001    | E121 | 2_TssAFlnk | 30  | 0.8790 | 0.0032 | 0.7273 |
| 0.001    | E054 | 7_Enh      | 209 | 0.8789 | 0.0224 | 0.9704 |
| 0.001    | E067 | 1_TssA     | 74  | 0.8788 | 0.0079 | 0.8568 |
| 0.001    | E107 | 11_BivFlnk | 15  | 0.8788 | 0.0016 | 0.6350 |
| 0.001    | E095 | 1_TssA     | 62  | 0.8783 | 0.0067 | 0.8330 |
| 0.001    | E024 | 1_TssA     | 55  | 0.8782 | 0.0059 | 0.8161 |
| 0.001    | E087 | 1_TssA     | 94  | 0.8772 | 0.0101 | 0.8923 |
| 0.001    | E036 | 12_EnhBiv  | 12  | 0.8772 | 0.0013 | 0.6095 |
| 0.01     | E065 | 10_TssBiv  | 12  | 0.8771 | 0.0001 | 0.6095 |
| 1.00E-04 | E113 | 1_TssA     | 4   | 0.8769 | 0.0038 | 0.4798 |
| 0.001    | E085 | 1_TssA     | 52  | 0.8769 | 0.0056 | 0.8111 |
| 0.001    | E118 | 7_Enh      | 330 | 0.8768 | 0.0354 | 0.9930 |
| 0.01     | E018 | 11_BivFlnk | 103 | 0.8764 | 0.0011 | 0.9042 |
| 0.001    | E011 | 6_EnhG     | 19  | 0.8759 | 0.0020 | 0.6710 |
| 0.001    | E104 | 1_TssA     | 84  | 0.8757 | 0.0090 | 0.8810 |
| 0.01     | E112 | 6_EnhG     | 209 | 0.8755 | 0.0022 | 0.9727 |
| 0.001    | E014 | 1_TssA     | 65  | 0.8754 | 0.0070 | 0.8463 |
| 0.001    | E108 | 3_TxFlnk   | 4   | 0.8753 | 0.0004 | 0.4811 |

|          |      |            |     |        |        |        |
|----------|------|------------|-----|--------|--------|--------|
| 0.001    | E044 | 11_BivFlnk | 10  | 0.8753 | 0.0011 | 0.5899 |
| 0.01     | E094 | 3_TxFlnk   | 10  | 0.8752 | 0.0001 | 0.5899 |
| 0.001    | E010 | 2_TssAFlnk | 43  | 0.8748 | 0.0046 | 0.7883 |
| 0.001    | E040 | 1_TssA     | 33  | 0.8746 | 0.0035 | 0.7505 |
| 0.01     | E067 | 10_TssBiv  | 47  | 0.8744 | 0.0005 | 0.8016 |
| 0.001    | E019 | 2_TssAFlnk | 27  | 0.8743 | 0.0029 | 0.7226 |
| 1.00E-04 | E102 | 7_Enh      | 22  | 0.8742 | 0.0211 | 0.6966 |
| 0.001    | E050 | 2_TssAFlnk | 78  | 0.8742 | 0.0084 | 0.8743 |
| 0.001    | E129 | 1_TssA     | 54  | 0.8740 | 0.0058 | 0.8231 |
| 1.00E-04 | E021 | 1_TssA     | 7   | 0.8740 | 0.0067 | 0.5489 |
| 0.01     | E123 | 10_TssBiv  | 9   | 0.8735 | 0.0001 | 0.5795 |
| 0.001    | E058 | 2_TssAFlnk | 45  | 0.8734 | 0.0048 | 0.7982 |
| 0.001    | E112 | 7_Enh      | 115 | 0.8725 | 0.0123 | 0.9261 |
| 1.00E-05 | E024 | 7_Enh      | 3   | 0.8723 | 0.0316 | 0.4520 |
| 0.001    | E114 | 2_TssAFlnk | 64  | 0.8721 | 0.0069 | 0.8518 |
| 1.00E-04 | E032 | 2_TssAFlnk | 4   | 0.8720 | 0.0038 | 0.4846 |
| 0.01     | E085 | 10_TssBiv  | 104 | 0.8716 | 0.0011 | 0.9149 |
| 0.01     | E127 | 10_TssBiv  | 68  | 0.8710 | 0.0007 | 0.8616 |
| 0.001    | E059 | 3_TxFlnk   | 6   | 0.8703 | 0.0006 | 0.5344 |
| 0.001    | E104 | 3_TxFlnk   | 10  | 0.8699 | 0.0011 | 0.5979 |
| 0.001    | E075 | 2_TssAFlnk | 30  | 0.8698 | 0.0032 | 0.7473 |
| 0.001    | E052 | 7_Enh      | 294 | 0.8693 | 0.0316 | 0.9931 |
| 0.001    | E128 | 1_TssA     | 66  | 0.8693 | 0.0071 | 0.8622 |
| 0.001    | E006 | 1_TssA     | 40  | 0.8693 | 0.0043 | 0.7902 |
| 0.01     | E098 | 6_EnhG     | 285 | 0.8682 | 0.0030 | 0.9920 |
| 1.00E-04 | E034 | 7_Enh      | 21  | 0.8676 | 0.0201 | 0.7031 |
| 0.01     | E078 | 3_TxFlnk   | 26  | 0.8675 | 0.0003 | 0.7310 |
| 0.001    | E003 | 10_TssBiv  | 18  | 0.8675 | 0.0019 | 0.6795 |
| 0.01     | E074 | 2_TssAFlnk | 299 | 0.8668 | 0.0031 | 0.9938 |
| 1.00E-04 | E009 | 1_TssA     | 6   | 0.8662 | 0.0058 | 0.5398 |
| 0.01     | E002 | 12_EnhBiv  | 88  | 0.8662 | 0.0009 | 0.9053 |
| 1.00E-04 | E025 | 2_TssAFlnk | 7   | 0.8661 | 0.0067 | 0.5591 |
| 0.001    | E042 | 11_BivFlnk | 3   | 0.8656 | 0.0003 | 0.4560 |
| 0.001    | E028 | 1_TssA     | 49  | 0.8640 | 0.0053 | 0.8313 |
| 0.001    | E108 | 12_EnhBiv  | 16  | 0.8632 | 0.0017 | 0.6710 |
| 0.001    | E109 | 1_TssA     | 43  | 0.8631 | 0.0046 | 0.8144 |
| 1.00E-04 | E052 | 2_TssAFlnk | 7   | 0.8625 | 0.0067 | 0.5637 |
| 0.001    | E116 | 1_TssA     | 71  | 0.8622 | 0.0076 | 0.8868 |
| 0.001    | E075 | 1_TssA     | 58  | 0.8614 | 0.0062 | 0.8609 |
| 1.00E-04 | E025 | 7_Enh      | 47  | 0.8608 | 0.0451 | 0.8383 |
| 1.00E-04 | E128 | 2_TssAFlnk | 3   | 0.8607 | 0.0029 | 0.4604 |
| 0.001    | E010 | 1_TssA     | 43  | 0.8606 | 0.0046 | 0.8195 |
| 0.001    | E084 | 7_Enh      | 257 | 0.8600 | 0.0276 | 0.9934 |

|          |      |            |     |        |        |        |
|----------|------|------------|-----|--------|--------|--------|
| 0.001    | E111 | 10_TssBiv  | 8   | 0.8599 | 0.0009 | 0.5837 |
| 0.001    | E032 | 1_TssA     | 28  | 0.8598 | 0.0030 | 0.7579 |
| 0.001    | E093 | 7_Enh      | 234 | 0.8598 | 0.0251 | 0.9909 |
| 0.001    | E004 | 10_TssBiv  | 9   | 0.8597 | 0.0010 | 0.5993 |
| 1.00E-04 | E023 | 2_TssAFlnk | 8   | 0.8576 | 0.0077 | 0.5876 |
| 1.00E-04 | E076 | 7_Enh      | 27  | 0.8573 | 0.0259 | 0.7609 |
| 0.01     | E063 | 12_EnhBiv  | 141 | 0.8571 | 0.0015 | 0.9661 |
| 0.001    | E079 | 1_TssA     | 54  | 0.8568 | 0.0058 | 0.8603 |
| 0.001    | E080 | 12_EnhBiv  | 56  | 0.8567 | 0.0060 | 0.8656 |
| 0.001    | E107 | 1_TssA     | 44  | 0.8562 | 0.0047 | 0.8321 |
| 0.01     | E043 | 10_TssBiv  | 11  | 0.8562 | 0.0001 | 0.6312 |
| 0.001    | E052 | 12_EnhBiv  | 7   | 0.8561 | 0.0008 | 0.5714 |
| 0.001    | E089 | 6_EnhG     | 57  | 0.8557 | 0.0061 | 0.8701 |
| 0.001    | E002 | 7_Enh      | 102 | 0.8556 | 0.0109 | 0.9410 |
| 0.001    | E014 | 10_TssBiv  | 24  | 0.8554 | 0.0026 | 0.7439 |
| 0.01     | E033 | 10_TssBiv  | 82  | 0.8552 | 0.0009 | 0.9169 |
| 0.001    | E052 | 2_TssAFlnk | 62  | 0.8552 | 0.0067 | 0.8826 |
| 0.001    | E063 | 2_TssAFlnk | 69  | 0.8547 | 0.0074 | 0.8974 |
| 0.001    | E108 | 6_EnhG     | 35  | 0.8543 | 0.0038 | 0.8022 |
| 0.001    | E122 | 7_Enh      | 240 | 0.8543 | 0.0258 | 0.9938 |
| 0.001    | E083 | 7_Enh      | 405 | 0.8538 | 0.0435 | 0.9995 |
| 0.01     | E028 | 12_EnhBiv  | 68  | 0.8537 | 0.0007 | 0.8965 |
| 1.00E-04 | E029 | 2_TssAFlnk | 4   | 0.8533 | 0.0038 | 0.5034 |
| 0.01     | E004 | 12_EnhBiv  | 35  | 0.8525 | 0.0004 | 0.8055 |
| 0.01     | E065 | 12_EnhBiv  | 4   | 0.8524 | 0.0000 | 0.5040 |
| 0.01     | E083 | 2_TssAFlnk | 296 | 0.8522 | 0.0031 | 0.9974 |
| 0.01     | E055 | 12_EnhBiv  | 303 | 0.8516 | 0.0032 | 0.9978 |
| 0.001    | E111 | 2_TssAFlnk | 73  | 0.8512 | 0.0078 | 0.9107 |
| 0.001    | E015 | 6_EnhG     | 16  | 0.8511 | 0.0017 | 0.6925 |
| 0.001    | E024 | 2_TssAFlnk | 14  | 0.8510 | 0.0015 | 0.6734 |
| 1.00E-04 | E004 | 1_TssA     | 6   | 0.8505 | 0.0058 | 0.5589 |
| 1.00E-04 | E079 | 1_TssA     | 6   | 0.8504 | 0.0058 | 0.5590 |
| 0.001    | E122 | 3_TxFlnk   | 3   | 0.8501 | 0.0003 | 0.4696 |
| 0.01     | E096 | 12_EnhBiv  | 53  | 0.8492 | 0.0006 | 0.8719 |
| 0.001    | E004 | 2_TssAFlnk | 3   | 0.8491 | 0.0003 | 0.4705 |
| 0.001    | E025 | 7_Enh      | 414 | 0.8488 | 0.0444 | 0.9998 |
| 0.001    | E052 | 1_TssA     | 48  | 0.8482 | 0.0052 | 0.8606 |
| 0.01     | E079 | 6_EnhG     | 232 | 0.8475 | 0.0024 | 0.9947 |
| 0.001    | E049 | 12_EnhBiv  | 7   | 0.8472 | 0.0008 | 0.5831 |
| 0.001    | E070 | 1_TssA     | 45  | 0.8472 | 0.0048 | 0.8535 |
| 0.01     | E006 | 3_TxFlnk   | 29  | 0.8471 | 0.0003 | 0.7882 |
| 0.001    | E022 | 7_Enh      | 229 | 0.8464 | 0.0246 | 0.9952 |
| 0.001    | E029 | 6_EnhG     | 26  | 0.8464 | 0.0028 | 0.7734 |

|          |      |            |     |        |        |        |
|----------|------|------------|-----|--------|--------|--------|
| 0.01     | E065 | 2_TssAFlnk | 29  | 0.8463 | 0.0003 | 0.7897 |
| 0.01     | E008 | 12_EnhBiv  | 34  | 0.8462 | 0.0004 | 0.8137 |
| 0.001    | E080 | 1_TssA     | 35  | 0.8461 | 0.0038 | 0.8188 |
| 0.01     | E001 | 3_TxFlnk   | 23  | 0.8452 | 0.0002 | 0.7569 |
| 0.01     | E101 | 10_TssBiv  | 75  | 0.8435 | 0.0008 | 0.9256 |
| 0.01     | E086 | 6_EnhG     | 46  | 0.8433 | 0.0005 | 0.8632 |
| 0.001    | E110 | 1_TssA     | 38  | 0.8432 | 0.0041 | 0.8366 |
| 0.01     | E023 | 6_EnhG     | 291 | 0.8429 | 0.0031 | 0.9985 |
| 0.001    | E078 | 7_Enh      | 138 | 0.8420 | 0.0148 | 0.9794 |
| 0.01     | E114 | 3_TxFlnk   | 128 | 0.8420 | 0.0013 | 0.9743 |
| 0.001    | E026 | 7_Enh      | 259 | 0.8419 | 0.0278 | 0.9979 |
| 0.01     | E103 | 6_EnhG     | 93  | 0.8413 | 0.0010 | 0.9505 |
| 0.001    | E073 | 1_TssA     | 72  | 0.8409 | 0.0077 | 0.9258 |
| 0.001    | E059 | 2_TssAFlnk | 21  | 0.8404 | 0.0023 | 0.7524 |
| 0.001    | E085 | 2_TssAFlnk | 20  | 0.8403 | 0.0021 | 0.7451 |
| 0.001    | E041 | 1_TssA     | 38  | 0.8402 | 0.0041 | 0.8422 |
| 0.01     | E067 | 11_BivFlnk | 12  | 0.8397 | 0.0001 | 0.6696 |
| 1.00E-04 | E099 | 7_Enh      | 19  | 0.8397 | 0.0182 | 0.7408 |
| 0.001    | E066 | 2_TssAFlnk | 55  | 0.8396 | 0.0059 | 0.8949 |
| 0.001    | E091 | 11_BivFlnk | 6   | 0.8394 | 0.0006 | 0.5721 |
| 0.001    | E013 | 1_TssA     | 64  | 0.8388 | 0.0069 | 0.9154 |
| 0.01     | E110 | 10_TssBiv  | 27  | 0.8387 | 0.0003 | 0.7935 |
| 0.001    | E021 | 1_TssA     | 60  | 0.8386 | 0.0064 | 0.9077 |
| 0.001    | E086 | 1_TssA     | 64  | 0.8385 | 0.0069 | 0.9158 |
| 1.00E-04 | E104 | 1_TssA     | 9   | 0.8381 | 0.0086 | 0.6315 |
| 0.01     | E080 | 2_TssAFlnk | 270 | 0.8369 | 0.0028 | 0.9986 |
| 0.001    | E071 | 7_Enh      | 249 | 0.8367 | 0.0267 | 0.9982 |
| 1.00E-04 | E008 | 1_TssA     | 9   | 0.8367 | 0.0086 | 0.6335 |
| 0.01     | E120 | 12_EnhBiv  | 18  | 0.8366 | 0.0002 | 0.7355 |
| 0.001    | E053 | 7_Enh      | 272 | 0.8366 | 0.0292 | 0.9988 |
| 0.001    | E081 | 12_EnhBiv  | 27  | 0.8363 | 0.0029 | 0.7984 |
| 0.01     | E082 | 12_EnhBiv  | 52  | 0.8360 | 0.0005 | 0.8930 |
| 0.001    | E093 | 2_TssAFlnk | 29  | 0.8357 | 0.0031 | 0.8104 |
| 0.001    | E128 | 2_TssAFlnk | 26  | 0.8351 | 0.0028 | 0.7949 |
| 0.001    | E120 | 1_TssA     | 61  | 0.8348 | 0.0065 | 0.9158 |
| 0.01     | E086 | 12_EnhBiv  | 38  | 0.8330 | 0.0004 | 0.8550 |
| 1.00E-04 | E042 | 6_EnhG     | 3   | 0.8329 | 0.0029 | 0.4854 |
| 0.001    | E123 | 2_TssAFlnk | 52  | 0.8329 | 0.0056 | 0.8990 |
| 0.001    | E117 | 1_TssA     | 53  | 0.8324 | 0.0057 | 0.9021 |
| 0.001    | E124 | 1_TssA     | 30  | 0.8314 | 0.0032 | 0.8234 |
| 0.001    | E018 | 2_TssAFlnk | 19  | 0.8311 | 0.0020 | 0.7537 |
| 0.01     | E010 | 10_TssBiv  | 32  | 0.8305 | 0.0003 | 0.8344 |
| 0.001    | E057 | 6_EnhG     | 44  | 0.8300 | 0.0047 | 0.8816 |

|          |      |            |     |        |        |        |
|----------|------|------------|-----|--------|--------|--------|
| 0.001    | E090 | 6_EnhG     | 68  | 0.8298 | 0.0073 | 0.9353 |
| 0.01     | E030 | 3_TxFlnk   | 39  | 0.8292 | 0.0004 | 0.8654 |
| 0.001    | E032 | 3_TxFlnk   | 3   | 0.8290 | 0.0003 | 0.4888 |
| 0.01     | E051 | 3_TxFlnk   | 43  | 0.8290 | 0.0005 | 0.8795 |
| 0.001    | E013 | 3_TxFlnk   | 5   | 0.8289 | 0.0005 | 0.5596 |
| 0.001    | E121 | 1_TssA     | 60  | 0.8287 | 0.0064 | 0.9229 |
| 0.001    | E073 | 10_TssBiv  | 7   | 0.8285 | 0.0008 | 0.6078 |
| 0.001    | E127 | 11_BivFlnk | 5   | 0.8279 | 0.0005 | 0.5607 |
| 0.001    | E020 | 1_TssA     | 62  | 0.8278 | 0.0067 | 0.9280 |
| 0.001    | E104 | 6_EnhG     | 3   | 0.8278 | 0.0003 | 0.4899 |
| 0.001    | E020 | 2_TssAFlnk | 32  | 0.8275 | 0.0034 | 0.8402 |
| 0.01     | E024 | 12_EnhBiv  | 157 | 0.8274 | 0.0017 | 0.9919 |
| 1.00E-05 | E049 | 7_Enh      | 3   | 0.8271 | 0.0316 | 0.4931 |
| 0.001    | E023 | 6_EnhG     | 28  | 0.8269 | 0.0030 | 0.8211 |
| 0.001    | E123 | 7_Enh      | 207 | 0.8254 | 0.0222 | 0.9978 |
| 0.001    | E022 | 1_TssA     | 47  | 0.8237 | 0.0050 | 0.9005 |
| 1.00E-04 | E085 | 7_Enh      | 25  | 0.8235 | 0.0240 | 0.8132 |
| 0.01     | E022 | 10_TssBiv  | 29  | 0.8224 | 0.0003 | 0.8340 |
| 0.01     | E062 | 6_EnhG     | 208 | 0.8222 | 0.0022 | 0.9980 |
| 0.001    | E005 | 2_TssAFlnk | 13  | 0.8215 | 0.0014 | 0.7112 |
| 0.001    | E071 | 6_EnhG     | 23  | 0.8207 | 0.0025 | 0.8019 |
| 0.001    | E102 | 1_TssA     | 50  | 0.8206 | 0.0054 | 0.9130 |
| 0.001    | E006 | 12_EnhBiv  | 17  | 0.8203 | 0.0018 | 0.7552 |
| 0.01     | E061 | 12_EnhBiv  | 119 | 0.8198 | 0.0013 | 0.9855 |
| 0.01     | E009 | 3_TxFlnk   | 54  | 0.8196 | 0.0006 | 0.9230 |
| 1.00E-04 | E086 | 1_TssA     | 7   | 0.8192 | 0.0067 | 0.6210 |
| 1.00E-04 | E127 | 1_TssA     | 5   | 0.8192 | 0.0048 | 0.5714 |
| 0.001    | E050 | 11_BivFlnk | 13  | 0.8190 | 0.0014 | 0.7152 |
| 0.001    | E111 | 1_TssA     | 61  | 0.8184 | 0.0065 | 0.9387 |
| 0.001    | E012 | 7_Enh      | 211 | 0.8182 | 0.0226 | 0.9987 |
| 0.001    | E066 | 6_EnhG     | 33  | 0.8181 | 0.0035 | 0.8609 |
| 0.001    | E015 | 7_Enh      | 272 | 0.8180 | 0.0292 | 0.9997 |
| 0.001    | E034 | 1_TssA     | 28  | 0.8180 | 0.0030 | 0.8368 |
| 0.001    | E084 | 11_BivFlnk | 6   | 0.8175 | 0.0006 | 0.5997 |
| 1.00E-04 | E056 | 12_EnhBiv  | 3   | 0.8172 | 0.0029 | 0.5000 |
| 0.001    | E020 | 7_Enh      | 203 | 0.8164 | 0.0218 | 0.9986 |
| 0.001    | E049 | 7_Enh      | 290 | 0.8153 | 0.0311 | 0.9999 |
| 0.001    | E077 | 6_EnhG     | 22  | 0.8142 | 0.0024 | 0.8062 |
| 0.001    | E128 | 7_Enh      | 192 | 0.8140 | 0.0206 | 0.9984 |
| 0.001    | E122 | 2_TssAFlnk | 53  | 0.8139 | 0.0057 | 0.9292 |
| 0.01     | E065 | 6_EnhG     | 55  | 0.8138 | 0.0006 | 0.9328 |
| 1.00E-04 | E112 | 7_Enh      | 12  | 0.8132 | 0.0115 | 0.7134 |
| 0.01     | E024 | 3_TxFlnk   | 11  | 0.8129 | 0.0001 | 0.6985 |

|          |      |            |     |        |        |        |
|----------|------|------------|-----|--------|--------|--------|
| 0.001    | E012 | 1_TssA     | 47  | 0.8111 | 0.0050 | 0.9190 |
| 0.001    | E077 | 11_BivFlnk | 6   | 0.8086 | 0.0006 | 0.6110 |
| 0.001    | E107 | 6_EnhG     | 37  | 0.8086 | 0.0040 | 0.8922 |
| 0.001    | E048 | 2_TssAFlnk | 35  | 0.8085 | 0.0038 | 0.8848 |
| 0.001    | E017 | 3_TxFlnk   | 5   | 0.8074 | 0.0005 | 0.5848 |
| 0.01     | E082 | 6_EnhG     | 95  | 0.8070 | 0.0010 | 0.9823 |
| 0.01     | E019 | 3_TxFlnk   | 32  | 0.8067 | 0.0003 | 0.8745 |
| 0.001    | E099 | 7_Enh      | 163 | 0.8064 | 0.0175 | 0.9977 |
| 0.001    | E034 | 12_EnhBiv  | 39  | 0.8060 | 0.0042 | 0.9029 |
| 0.001    | E031 | 1_TssA     | 22  | 0.8058 | 0.0024 | 0.8203 |
| 0.001    | E084 | 2_TssAFlnk | 19  | 0.8053 | 0.0020 | 0.7980 |
| 0.001    | E097 | 1_TssA     | 66  | 0.8053 | 0.0071 | 0.9603 |
| 0.001    | E084 | 10_TssBiv  | 10  | 0.8051 | 0.0011 | 0.6955 |
| 0.01     | E054 | 6_EnhG     | 141 | 0.8050 | 0.0015 | 0.9956 |
| 0.001    | E009 | 2_TssAFlnk | 22  | 0.8047 | 0.0024 | 0.8221 |
| 0.001    | E052 | 3_TxFlnk   | 6   | 0.8040 | 0.0006 | 0.6168 |
| 0.001    | E085 | 7_Enh      | 218 | 0.8039 | 0.0234 | 0.9996 |
| 0.01     | E066 | 6_EnhG     | 330 | 0.8024 | 0.0035 | 1.0000 |
| 0.001    | E116 | 2_TssAFlnk | 86  | 0.8024 | 0.0092 | 0.9804 |
| 0.001    | E057 | 3_TxFlnk   | 9   | 0.8018 | 0.0010 | 0.6835 |
| 0.001    | E100 | 1_TssA     | 64  | 0.7996 | 0.0069 | 0.9630 |
| 0.001    | E109 | 10_TssBiv  | 3   | 0.7982 | 0.0003 | 0.5180 |
| 0.001    | E071 | 1_TssA     | 61  | 0.7981 | 0.0065 | 0.9604 |
| 0.001    | E022 | 2_TssAFlnk | 17  | 0.7971 | 0.0018 | 0.7936 |
| 0.01     | E036 | 6_EnhG     | 412 | 0.7969 | 0.0043 | 1.0000 |
| 1.00E-05 | E119 | 7_Enh      | 3   | 0.7968 | 0.0316 | 0.5225 |
| 0.001    | E021 | 2_TssAFlnk | 4   | 0.7962 | 0.0004 | 0.5637 |
| 0.001    | E093 | 12_EnhBiv  | 18  | 0.7956 | 0.0019 | 0.8052 |
| 1.00E-04 | E003 | 1_TssA     | 6   | 0.7946 | 0.0058 | 0.6295 |
| 1.00E-04 | E024 | 7_Enh      | 30  | 0.7945 | 0.0288 | 0.8882 |
| 0.001    | E033 | 7_Enh      | 155 | 0.7941 | 0.0166 | 0.9985 |
| 0.01     | E080 | 3_TxFlnk   | 21  | 0.7938 | 0.0002 | 0.8321 |
| 0.001    | E010 | 10_TssBiv  | 3   | 0.7938 | 0.0003 | 0.5223 |
| 1.00E-04 | E110 | 1_TssA     | 4   | 0.7928 | 0.0038 | 0.5678 |
| 0.001    | E001 | 7_Enh      | 267 | 0.7928 | 0.0287 | 1.0000 |
| 0.001    | E083 | 1_TssA     | 29  | 0.7927 | 0.0031 | 0.8822 |
| 0.001    | E015 | 11_BivFlnk | 12  | 0.7921 | 0.0013 | 0.7448 |
| 0.001    | E055 | 11_BivFlnk | 15  | 0.7921 | 0.0016 | 0.7813 |
| 0.01     | E067 | 3_TxFlnk   | 7   | 0.7919 | 0.0001 | 0.6570 |
| 0.01     | E116 | 11_BivFlnk | 25  | 0.7907 | 0.0003 | 0.8634 |
| 0.01     | E042 | 10_TssBiv  | 11  | 0.7898 | 0.0001 | 0.7338 |
| 1.00E-04 | E039 | 6_EnhG     | 3   | 0.7898 | 0.0029 | 0.5265 |
| 0.001    | E013 | 2_TssAFlnk | 7   | 0.7897 | 0.0008 | 0.6600 |



|          |      |            |     |        |        |        |
|----------|------|------------|-----|--------|--------|--------|
| 0.01     | E101 | 12_EnhBiv  | 50  | 0.7896 | 0.0005 | 0.9505 |
| 0.01     | E072 | 11_BivFlnk | 29  | 0.7894 | 0.0003 | 0.8866 |
| 0.01     | E049 | 10_TssBiv  | 41  | 0.7889 | 0.0004 | 0.9308 |
| 0.001    | E124 | 11_BivFlnk | 14  | 0.7887 | 0.0015 | 0.7753 |
| 0.001    | E103 | 7_Enh      | 149 | 0.7887 | 0.0160 | 0.9986 |
| 1.00E-04 | E028 | 1_TssA     | 5   | 0.7876 | 0.0048 | 0.6092 |
| 0.001    | E005 | 7_Enh      | 224 | 0.7873 | 0.0240 | 0.9999 |
| 0.001    | E118 | 10_TssBiv  | 26  | 0.7873 | 0.0028 | 0.8745 |
| 0.001    | E014 | 2_TssAFlnk | 24  | 0.7867 | 0.0026 | 0.8637 |
| 0.001    | E074 | 10_TssBiv  | 3   | 0.7859 | 0.0003 | 0.5300 |
| 1.00E-05 | E028 | 7_Enh      | 3   | 0.7849 | 0.0316 | 0.5345 |
| 0.001    | E070 | 10_TssBiv  | 16  | 0.7848 | 0.0017 | 0.8033 |
| 0.001    | E053 | 12_EnhBiv  | 16  | 0.7846 | 0.0017 | 0.8036 |
| 0.001    | E096 | 1_TssA     | 43  | 0.7845 | 0.0046 | 0.9414 |
| 1.00E-04 | E070 | 7_Enh      | 18  | 0.7845 | 0.0173 | 0.8253 |
| 0.001    | E076 | 1_TssA     | 56  | 0.7843 | 0.0060 | 0.9654 |
| 1.00E-04 | E056 | 2_TssAFlnk | 4   | 0.7840 | 0.0038 | 0.5776 |
| 0.001    | E022 | 3_TxFlnk   | 10  | 0.7830 | 0.0011 | 0.7283 |
| 0.001    | E089 | 11_BivFlnk | 17  | 0.7830 | 0.0018 | 0.8158 |
| 0.001    | E024 | 7_Enh      | 264 | 0.7827 | 0.0283 | 1.0000 |
| 0.001    | E021 | 7_Enh      | 113 | 0.7804 | 0.0121 | 0.9966 |
| 0.001    | E023 | 7_Enh      | 291 | 0.7799 | 0.0312 | 1.0000 |
| 0.001    | E046 | 1_TssA     | 26  | 0.7798 | 0.0028 | 0.8852 |
| 0.001    | E014 | 7_Enh      | 247 | 0.7795 | 0.0265 | 1.0000 |
| 0.01     | E010 | 3_TxFlnk   | 36  | 0.7789 | 0.0004 | 0.9278 |
| 0.001    | E013 | 12_EnhBiv  | 3   | 0.7784 | 0.0003 | 0.5375 |
| 0.001    | E069 | 1_TssA     | 59  | 0.7784 | 0.0063 | 0.9734 |
| 0.001    | E026 | 1_TssA     | 56  | 0.7784 | 0.0060 | 0.9699 |
| 0.001    | E108 | 1_TssA     | 40  | 0.7760 | 0.0043 | 0.9429 |
| 0.01     | E124 | 10_TssBiv  | 28  | 0.7759 | 0.0003 | 0.9002 |
| 0.01     | E066 | 3_TxFlnk   | 18  | 0.7757 | 0.0002 | 0.8357 |
| 1.00E-04 | E001 | 1_TssA     | 8   | 0.7755 | 0.0077 | 0.7028 |
| 0.001    | E029 | 11_BivFlnk | 6   | 0.7748 | 0.0006 | 0.6545 |
| 1.00E-04 | E010 | 7_Enh      | 26  | 0.7742 | 0.0249 | 0.8962 |
| 0.001    | E106 | 6_EnhG     | 15  | 0.7739 | 0.0016 | 0.8093 |
| 0.001    | E065 | 7_Enh      | 72  | 0.7732 | 0.0077 | 0.9867 |
| 0.01     | E070 | 6_EnhG     | 95  | 0.7721 | 0.0010 | 0.9949 |
| 0.001    | E058 | 1_TssA     | 46  | 0.7717 | 0.0049 | 0.9599 |
| 0.001    | E090 | 11_BivFlnk | 14  | 0.7714 | 0.0015 | 0.8018 |
| 0.001    | E012 | 2_TssAFlnk | 9   | 0.7712 | 0.0010 | 0.7277 |
| 0.001    | E129 | 2_TssAFlnk | 54  | 0.7705 | 0.0058 | 0.9728 |
| 0.01     | E024 | 6_EnhG     | 164 | 0.7692 | 0.0017 | 0.9997 |
| 0.001    | E072 | 1_TssA     | 65  | 0.7687 | 0.0070 | 0.9842 |

|          |      |            |     |        |        |        |
|----------|------|------------|-----|--------|--------|--------|
| 1.00E-04 | E055 | 12_EnhBiv  | 3   | 0.7679 | 0.0029 | 0.5484 |
| 0.01     | E008 | 6_EnhG     | 31  | 0.7677 | 0.0003 | 0.9232 |
| 0.001    | E112 | 1_TssA     | 42  | 0.7670 | 0.0045 | 0.9561 |
| 1.00E-04 | E062 | 7_Enh      | 7   | 0.7666 | 0.0067 | 0.6924 |
| 0.001    | E102 | 10_TssBiv  | 5   | 0.7664 | 0.0005 | 0.6345 |
| 0.01     | E100 | 3_TxFlnk   | 5   | 0.7656 | 0.0001 | 0.6354 |
| 0.001    | E027 | 1_TssA     | 60  | 0.7653 | 0.0064 | 0.9820 |
| 0.001    | E046 | 6_EnhG     | 41  | 0.7652 | 0.0044 | 0.9554 |
| 0.001    | E016 | 3_TxFlnk   | 4   | 0.7643 | 0.0004 | 0.5995 |
| 0.001    | E044 | 10_TssBiv  | 3   | 0.7643 | 0.0003 | 0.5518 |
| 0.01     | E088 | 3_TxFlnk   | 22  | 0.7637 | 0.0002 | 0.8830 |
| 0.01     | E018 | 6_EnhG     | 41  | 0.7632 | 0.0004 | 0.9568 |
| 1.00E-04 | E078 | 7_Enh      | 14  | 0.7631 | 0.0134 | 0.8161 |
| 0.001    | E057 | 1_TssA     | 45  | 0.7624 | 0.0048 | 0.9655 |
| 1.00E-04 | E059 | 1_TssA     | 6   | 0.7616 | 0.0058 | 0.6725 |
| 0.001    | E017 | 2_TssAFlnk | 22  | 0.7613 | 0.0024 | 0.8865 |
| 0.001    | E092 | 1_TssA     | 38  | 0.7604 | 0.0041 | 0.9527 |
| 0.001    | E027 | 12_EnhBiv  | 10  | 0.7602 | 0.0011 | 0.7616 |
| 0.01     | E121 | 3_TxFlnk   | 15  | 0.7598 | 0.0002 | 0.8298 |
| 1.00E-04 | E095 | 1_TssA     | 6   | 0.7593 | 0.0058 | 0.6755 |
| 0.001    | E018 | 6_EnhG     | 4   | 0.7591 | 0.0004 | 0.6055 |
| 0.001    | E020 | 6_EnhG     | 9   | 0.7585 | 0.0010 | 0.7458 |
| 0.001    | E019 | 7_Enh      | 242 | 0.7585 | 0.0260 | 1.0000 |
| 0.01     | E039 | 10_TssBiv  | 16  | 0.7583 | 0.0002 | 0.8422 |
| 0.001    | E078 | 1_TssA     | 62  | 0.7583 | 0.0067 | 0.9866 |
| 0.01     | E075 | 12_EnhBiv  | 59  | 0.7580 | 0.0006 | 0.9842 |
| 0.01     | E023 | 12_EnhBiv  | 42  | 0.7571 | 0.0004 | 0.9636 |
| 0.001    | E099 | 1_TssA     | 37  | 0.7563 | 0.0040 | 0.9538 |
| 0.001    | E016 | 2_TssAFlnk | 17  | 0.7554 | 0.0018 | 0.8560 |
| 0.001    | E077 | 1_TssA     | 57  | 0.7552 | 0.0061 | 0.9842 |
| 1.00E-04 | E081 | 1_TssA     | 3   | 0.7548 | 0.0029 | 0.5619 |
| 0.001    | E018 | 7_Enh      | 230 | 0.7545 | 0.0247 | 1.0000 |
| 0.001    | E103 | 10_TssBiv  | 8   | 0.7544 | 0.0009 | 0.7311 |
| 0.001    | E106 | 1_TssA     | 39  | 0.7538 | 0.0042 | 0.9605 |
| 1.00E-04 | E005 | 7_Enh      | 24  | 0.7535 | 0.0230 | 0.9112 |
| 0.001    | E028 | 2_TssAFlnk | 12  | 0.7528 | 0.0013 | 0.8031 |
| 0.001    | E127 | 1_TssA     | 41  | 0.7520 | 0.0044 | 0.9659 |
| 0.001    | E041 | 3_TxFlnk   | 10  | 0.7517 | 0.0011 | 0.7736 |
| 1.00E-04 | E035 | 2_TssAFlnk | 6   | 0.7513 | 0.0058 | 0.6858 |
| 0.001    | E119 | 1_TssA     | 41  | 0.7494 | 0.0044 | 0.9677 |
| 1.00E-04 | E018 | 1_TssA     | 7   | 0.7481 | 0.0067 | 0.7174 |
| 0.001    | E114 | 1_TssA     | 63  | 0.7471 | 0.0068 | 0.9910 |
| 0.01     | E053 | 3_TxFlnk   | 9   | 0.7465 | 0.0001 | 0.7626 |

|          |      |            |     |        |        |        |
|----------|------|------------|-----|--------|--------|--------|
| 0.01     | E029 | 3_TxFlnk   | 13  | 0.7462 | 0.0001 | 0.8256 |
| 0.001    | E059 | 12_EnhBiv  | 17  | 0.7460 | 0.0018 | 0.8686 |
| 0.01     | E086 | 11_BivFlnk | 15  | 0.7453 | 0.0002 | 0.8500 |
| 0.001    | E055 | 12_EnhBiv  | 26  | 0.7450 | 0.0028 | 0.9276 |
| 0.01     | E110 | 6_EnhG     | 54  | 0.7438 | 0.0006 | 0.9862 |
| 0.001    | E044 | 1_TssA     | 27  | 0.7438 | 0.0029 | 0.9333 |
| 0.001    | E010 | 12_EnhBiv  | 13  | 0.7427 | 0.0014 | 0.8307 |
| 1.00E-04 | E041 | 7_Enh      | 22  | 0.7426 | 0.0211 | 0.9123 |
| 0.01     | E099 | 3_TxFlnk   | 3   | 0.7425 | 0.0000 | 0.5744 |
| 1.00E-04 | E052 | 6_EnhG     | 3   | 0.7423 | 0.0029 | 0.5750 |
| 0.001    | E084 | 12_EnhBiv  | 10  | 0.7422 | 0.0011 | 0.7870 |
| 0.001    | E093 | 1_TssA     | 28  | 0.7419 | 0.0030 | 0.9392 |
| 0.001    | E003 | 7_Enh      | 201 | 0.7418 | 0.0216 | 1.0000 |
| 1.00E-04 | E114 | 1_TssA     | 7   | 0.7415 | 0.0067 | 0.7263 |
| 0.001    | E008 | 7_Enh      | 114 | 0.7413 | 0.0122 | 0.9996 |
| 0.001    | E036 | 11_BivFlnk | 6   | 0.7405 | 0.0006 | 0.6991 |
| 1.00E-04 | E121 | 1_TssA     | 6   | 0.7403 | 0.0058 | 0.7002 |
| 0.01     | E095 | 12_EnhBiv  | 51  | 0.7396 | 0.0005 | 0.9854 |
| 0.001    | E092 | 10_TssBiv  | 10  | 0.7395 | 0.0011 | 0.7907 |
| 0.001    | E105 | 1_TssA     | 60  | 0.7393 | 0.0064 | 0.9916 |
| 0.001    | E059 | 1_TssA     | 52  | 0.7389 | 0.0056 | 0.9868 |
| 0.001    | E050 | 6_EnhG     | 22  | 0.7380 | 0.0024 | 0.9147 |
| 1.00E-04 | E058 | 6_EnhG     | 5   | 0.7374 | 0.0048 | 0.6712 |
| 0.001    | E114 | 10_TssBiv  | 5   | 0.7355 | 0.0005 | 0.6728 |
| 0.01     | E040 | 10_TssBiv  | 4   | 0.7352 | 0.0000 | 0.6332 |
| 0.01     | E001 | 11_BivFlnk | 33  | 0.7346 | 0.0003 | 0.9608 |
| 0.01     | E082 | 3_TxFlnk   | 22  | 0.7343 | 0.0002 | 0.9184 |
| 0.01     | E091 | 10_TssBiv  | 14  | 0.7342 | 0.0001 | 0.8538 |
| 1.00E-04 | E030 | 2_TssAFlnk | 7   | 0.7340 | 0.0067 | 0.7364 |
| 0.001    | E083 | 2_TssAFlnk | 25  | 0.7339 | 0.0027 | 0.9344 |
| 1.00E-04 | E120 | 1_TssA     | 6   | 0.7335 | 0.0058 | 0.7091 |
| 0.01     | E031 | 6_EnhG     | 232 | 0.7324 | 0.0024 | 1.0000 |
| 0.001    | E081 | 1_TssA     | 26  | 0.7323 | 0.0028 | 0.9402 |
| 1.00E-04 | E089 | 7_Enh      | 17  | 0.7315 | 0.0163 | 0.8894 |
| 0.001    | E090 | 3_TxFlnk   | 3   | 0.7306 | 0.0003 | 0.5871 |
| 0.01     | E081 | 6_EnhG     | 20  | 0.7303 | 0.0002 | 0.9105 |
| 0.001    | E012 | 10_TssBiv  | 17  | 0.7299 | 0.0018 | 0.8890 |
| 0.001    | E098 | 1_TssA     | 42  | 0.7298 | 0.0045 | 0.9805 |
| 1.00E-04 | E082 | 1_TssA     | 6   | 0.7293 | 0.0058 | 0.7146 |
| 0.01     | E048 | 10_TssBiv  | 8   | 0.7288 | 0.0001 | 0.7660 |
| 0.001    | E039 | 11_BivFlnk | 4   | 0.7272 | 0.0004 | 0.6427 |
| 0.001    | E057 | 2_TssAFlnk | 35  | 0.7263 | 0.0038 | 0.9712 |
| 1.00E-04 | E015 | 7_Enh      | 27  | 0.7253 | 0.0259 | 0.9528 |

|          |      |            |     |        |        |        |
|----------|------|------------|-----|--------|--------|--------|
| 1.00E-04 | E003 | 7_Enh      | 22  | 0.7253 | 0.0211 | 0.9306 |
| 0.001    | E035 | 6_EnhG     | 10  | 0.7237 | 0.0011 | 0.8121 |
| 0.01     | E021 | 12_EnhBiv  | 60  | 0.7232 | 0.0006 | 0.9950 |
| 0.001    | E042 | 1_TssA     | 19  | 0.7231 | 0.0020 | 0.9120 |
| 0.01     | E002 | 11_BivFlnk | 5   | 0.7230 | 0.0001 | 0.6884 |
| 0.01     | E004 | 2_TssAFlnk | 26  | 0.7218 | 0.0003 | 0.9491 |
| 0.01     | E081 | 3_TxFlnk   | 3   | 0.7215 | 0.0000 | 0.5968 |
| 0.001    | E032 | 6_EnhG     | 44  | 0.7205 | 0.0047 | 0.9865 |
| 0.001    | E092 | 3_TxFlnk   | 3   | 0.7201 | 0.0003 | 0.5984 |
| 0.001    | E016 | 7_Enh      | 222 | 0.7186 | 0.0238 | 1.0000 |
| 0.001    | E007 | 7_Enh      | 131 | 0.7183 | 0.0141 | 1.0000 |
| 1.00E-04 | E077 | 2_TssAFlnk | 5   | 0.7163 | 0.0048 | 0.6976 |
| 0.001    | E036 | 1_TssA     | 24  | 0.7148 | 0.0026 | 0.9472 |
| 1.00E-04 | E074 | 1_TssA     | 6   | 0.7138 | 0.0058 | 0.7347 |
| 0.001    | E102 | 6_EnhG     | 13  | 0.7132 | 0.0014 | 0.8689 |
| 1.00E-04 | E024 | 1_TssA     | 5   | 0.7132 | 0.0048 | 0.7016 |
| 0.01     | E013 | 12_EnhBiv  | 28  | 0.7126 | 0.0003 | 0.9627 |
| 0.001    | E103 | 2_TssAFlnk | 27  | 0.7118 | 0.0029 | 0.9605 |
| 0.001    | E062 | 11_BivFlnk | 5   | 0.7111 | 0.0005 | 0.7034 |
| 0.001    | E124 | 3_TxFlnk   | 5   | 0.7105 | 0.0005 | 0.7042 |
| 0.001    | E100 | 6_EnhG     | 3   | 0.7104 | 0.0003 | 0.6089 |
| 1.00E-04 | E040 | 1_TssA     | 3   | 0.7103 | 0.0029 | 0.6094 |
| 1.00E-04 | E093 | 1_TssA     | 3   | 0.7100 | 0.0029 | 0.6097 |
| 0.001    | E079 | 6_EnhG     | 19  | 0.7077 | 0.0020 | 0.9278 |
| 0.001    | E039 | 6_EnhG     | 24  | 0.7073 | 0.0026 | 0.9532 |
| 1.00E-04 | E069 | 1_TssA     | 6   | 0.7071 | 0.0058 | 0.7433 |
| 0.001    | E003 | 12_EnhBiv  | 20  | 0.7070 | 0.0021 | 0.9345 |
| 1.00E-04 | E051 | 2_TssAFlnk | 11  | 0.7066 | 0.0105 | 0.8520 |
| 0.001    | E041 | 6_EnhG     | 40  | 0.7064 | 0.0043 | 0.9875 |
| 0.01     | E005 | 3_TxFlnk   | 18  | 0.7064 | 0.0002 | 0.9222 |
| 0.001    | E075 | 11_BivFlnk | 7   | 0.7060 | 0.0008 | 0.7722 |
| 0.001    | E118 | 12_EnhBiv  | 30  | 0.7032 | 0.0032 | 0.9738 |
| 0.01     | E012 | 3_TxFlnk   | 7   | 0.7019 | 0.0001 | 0.7773 |
| 1.00E-04 | E050 | 2_TssAFlnk | 7   | 0.7008 | 0.0067 | 0.7800 |
| 0.001    | E118 | 11_BivFlnk | 15  | 0.6992 | 0.0016 | 0.9059 |
| 0.001    | E033 | 6_EnhG     | 25  | 0.6961 | 0.0027 | 0.9647 |
| 0.001    | E001 | 12_EnhBiv  | 13  | 0.6956 | 0.0014 | 0.8895 |
| 0.001    | E077 | 12_EnhBiv  | 6   | 0.6956 | 0.0006 | 0.7571 |
| 0.001    | E095 | 2_TssAFlnk | 10  | 0.6937 | 0.0011 | 0.8505 |
| 0.001    | E056 | 11_BivFlnk | 13  | 0.6931 | 0.0014 | 0.8923 |
| 1.00E-04 | E031 | 2_TssAFlnk | 6   | 0.6913 | 0.0058 | 0.7636 |
| 0.001    | E049 | 2_TssAFlnk | 62  | 0.6898 | 0.0067 | 0.9989 |
| 0.001    | E120 | 3_TxFlnk   | 4   | 0.6886 | 0.0004 | 0.6886 |

|          |      |            |     |        |        |        |
|----------|------|------------|-----|--------|--------|--------|
| 0.001    | E116 | 6_EnhG     | 27  | 0.6874 | 0.0029 | 0.9752 |
| 0.001    | E015 | 2_TssAFlnk | 24  | 0.6871 | 0.0026 | 0.9670 |
| 1.00E-04 | E007 | 7_Enh      | 14  | 0.6857 | 0.0134 | 0.9124 |
| 0.001    | E062 | 6_EnhG     | 17  | 0.6851 | 0.0018 | 0.9354 |
| 0.01     | E126 | 3_TxFlnk   | 26  | 0.6837 | 0.0003 | 0.9744 |
| 0.001    | E085 | 10_TssBiv  | 8   | 0.6836 | 0.0009 | 0.8247 |
| 0.001    | E107 | 3_TxFlnk   | 7   | 0.6831 | 0.0008 | 0.8013 |
| 1.00E-04 | E117 | 7_Enh      | 19  | 0.6831 | 0.0182 | 0.9510 |
| 0.001    | E043 | 1_TssA     | 21  | 0.6793 | 0.0023 | 0.9611 |
| 0.001    | E109 | 12_EnhBiv  | 3   | 0.6783 | 0.0003 | 0.6446 |
| 0.001    | E121 | 12_EnhBiv  | 3   | 0.6779 | 0.0003 | 0.6450 |
| 0.001    | E015 | 12_EnhBiv  | 15  | 0.6772 | 0.0016 | 0.9277 |
| 0.001    | E123 | 3_TxFlnk   | 9   | 0.6767 | 0.0010 | 0.8533 |
| 0.01     | E076 | 6_EnhG     | 128 | 0.6758 | 0.0013 | 1.0000 |
| 0.001    | E129 | 3_TxFlnk   | 4   | 0.6747 | 0.0004 | 0.7053 |
| 0.001    | E119 | 2_TssAFlnk | 35  | 0.6743 | 0.0038 | 0.9918 |
| 1.00E-04 | E018 | 7_Enh      | 23  | 0.6740 | 0.0221 | 0.9731 |
| 0.001    | E093 | 10_TssBiv  | 4   | 0.6740 | 0.0004 | 0.7062 |
| 1.00E-04 | E059 | 6_EnhG     | 3   | 0.6729 | 0.0029 | 0.6511 |
| 0.001    | E045 | 11_BivFlnk | 3   | 0.6728 | 0.0003 | 0.6508 |
| 0.01     | E074 | 11_BivFlnk | 12  | 0.6719 | 0.0001 | 0.9031 |
| 1.00E-04 | E101 | 1_TssA     | 7   | 0.6682 | 0.0067 | 0.8210 |
| 0.001    | E093 | 6_EnhG     | 35  | 0.6656 | 0.0038 | 0.9935 |
| 0.001    | E112 | 11_BivFlnk | 5   | 0.6654 | 0.0005 | 0.7603 |
| 1.00E-04 | E075 | 1_TssA     | 5   | 0.6634 | 0.0048 | 0.7636 |
| 0.001    | E010 | 3_TxFlnk   | 3   | 0.6618 | 0.0003 | 0.6633 |
| 0.001    | E043 | 6_EnhG     | 34  | 0.6616 | 0.0036 | 0.9936 |
| 0.001    | E015 | 3_TxFlnk   | 5   | 0.6613 | 0.0005 | 0.7653 |
| 0.01     | E096 | 11_BivFlnk | 7   | 0.6608 | 0.0001 | 0.8285 |
| 0.001    | E087 | 2_TssAFlnk | 9   | 0.6597 | 0.0010 | 0.8728 |
| 0.001    | E063 | 1_TssA     | 29  | 0.6579 | 0.0031 | 0.9897 |
| 0.001    | E094 | 6_EnhG     | 20  | 0.6574 | 0.0021 | 0.9702 |
| 0.001    | E053 | 6_EnhG     | 17  | 0.6564 | 0.0018 | 0.9574 |
| 1.00E-04 | E093 | 7_Enh      | 20  | 0.6564 | 0.0192 | 0.9723 |
| 0.001    | E043 | 11_BivFlnk | 5   | 0.6561 | 0.0005 | 0.7716 |
| 1.00E-04 | E118 | 1_TssA     | 3   | 0.6559 | 0.0029 | 0.6706 |
| 0.001    | E082 | 11_BivFlnk | 5   | 0.6552 | 0.0005 | 0.7727 |
| 0.001    | E075 | 12_EnhBiv  | 5   | 0.6549 | 0.0005 | 0.7730 |
| 1.00E-04 | E119 | 1_TssA     | 4   | 0.6531 | 0.0038 | 0.7320 |
| 1.00E-04 | E127 | 2_TssAFlnk | 5   | 0.6530 | 0.0048 | 0.7763 |
| 0.001    | E127 | 10_TssBiv  | 5   | 0.6530 | 0.0005 | 0.7754 |
| 0.001    | E051 | 6_EnhG     | 23  | 0.6521 | 0.0025 | 0.9814 |
| 0.01     | E081 | 10_TssBiv  | 18  | 0.6512 | 0.0002 | 0.9654 |

|          |      |            |    |        |        |        |
|----------|------|------------|----|--------|--------|--------|
| 0.001    | E061 | 1_TssA     | 33 | 0.6509 | 0.0035 | 0.9947 |
| 1.00E-04 | E046 | 2_TssAFlnk | 3  | 0.6498 | 0.0029 | 0.6776 |
| 0.01     | E128 | 12_EnhBiv  | 22 | 0.6497 | 0.0002 | 0.9798 |
| 1.00E-04 | E046 | 7_Enh      | 18 | 0.6480 | 0.0173 | 0.9689 |
| 1.00E-04 | E080 | 1_TssA     | 3  | 0.6478 | 0.0029 | 0.6799 |
| 1.00E-04 | E053 | 1_TssA     | 3  | 0.6453 | 0.0029 | 0.6828 |
| 1.00E-04 | E122 | 1_TssA     | 3  | 0.6420 | 0.0029 | 0.6867 |
| 0.001    | E111 | 12_EnhBiv  | 9  | 0.6418 | 0.0010 | 0.8919 |
| 0.001    | E062 | 1_TssA     | 14 | 0.6404 | 0.0015 | 0.9497 |
| 0.001    | E073 | 6_EnhG     | 13 | 0.6400 | 0.0014 | 0.9421 |
| 1.00E-04 | E001 | 7_Enh      | 24 | 0.6366 | 0.0230 | 0.9895 |
| 1.00E-04 | E123 | 6_EnhG     | 3  | 0.6355 | 0.0029 | 0.6941 |
| 0.01     | E012 | 6_EnhG     | 25 | 0.6351 | 0.0003 | 0.9902 |
| 1.00E-04 | E017 | 6_EnhG     | 6  | 0.6316 | 0.0058 | 0.8362 |
| 0.01     | E105 | 12_EnhBiv  | 25 | 0.6282 | 0.0003 | 0.9918 |
| 1.00E-04 | E118 | 12_EnhBiv  | 3  | 0.6282 | 0.0029 | 0.7027 |
| 1.00E-04 | E012 | 7_Enh      | 18 | 0.6235 | 0.0173 | 0.9803 |
| 0.001    | E118 | 6_EnhG     | 34 | 0.6230 | 0.0036 | 0.9981 |
| 0.001    | E033 | 3_TxFlnk   | 3  | 0.6229 | 0.0003 | 0.7083 |
| 0.001    | E098 | 6_EnhG     | 20 | 0.6212 | 0.0021 | 0.9854 |
| 0.001    | E116 | 12_EnhBiv  | 3  | 0.6210 | 0.0003 | 0.7105 |
| 1.00E-04 | E014 | 7_Enh      | 22 | 0.6202 | 0.0211 | 0.9904 |
| 0.001    | E061 | 10_TssBiv  | 4  | 0.6198 | 0.0004 | 0.7712 |
| 0.001    | E063 | 12_EnhBiv  | 10 | 0.6198 | 0.0011 | 0.9272 |
| 0.001    | E101 | 11_BivFlnk | 3  | 0.6167 | 0.0003 | 0.7155 |
| 1.00E-04 | E012 | 1_TssA     | 4  | 0.6167 | 0.0038 | 0.7757 |
| 0.001    | E123 | 6_EnhG     | 26 | 0.6166 | 0.0028 | 0.9949 |
| 1.00E-04 | E019 | 7_Enh      | 22 | 0.6159 | 0.0211 | 0.9914 |
| 0.01     | E103 | 3_TxFlnk   | 14 | 0.6158 | 0.0001 | 0.9651 |
| 0.001    | E122 | 12_EnhBiv  | 4  | 0.6148 | 0.0004 | 0.7771 |
| 0.001    | E045 | 6_EnhG     | 8  | 0.6137 | 0.0009 | 0.9020 |
| 0.001    | E110 | 12_EnhBiv  | 12 | 0.6133 | 0.0013 | 0.9528 |
| 0.001    | E128 | 3_TxFlnk   | 4  | 0.6110 | 0.0004 | 0.7816 |
| 1.00E-04 | E063 | 1_TssA     | 3  | 0.6080 | 0.0029 | 0.7263 |
| 1.00E-04 | E085 | 1_TssA     | 4  | 0.6025 | 0.0038 | 0.7923 |
| 0.001    | E003 | 2_TssAFlnk | 9  | 0.6020 | 0.0010 | 0.9287 |
| 1.00E-04 | E054 | 7_Enh      | 16 | 0.6010 | 0.0153 | 0.9822 |
| 1.00E-04 | E058 | 1_TssA     | 4  | 0.5995 | 0.0038 | 0.7959 |
| 1.00E-04 | E111 | 1_TssA     | 5  | 0.5992 | 0.0048 | 0.8394 |
| 0.001    | E112 | 6_EnhG     | 14 | 0.5980 | 0.0015 | 0.9743 |
| 0.001    | E127 | 3_TxFlnk   | 6  | 0.5956 | 0.0006 | 0.8746 |
| 0.001    | E009 | 6_EnhG     | 11 | 0.5955 | 0.0012 | 0.9558 |
| 0.001    | E062 | 10_TssBiv  | 4  | 0.5943 | 0.0004 | 0.8011 |

|          |      |            |    |        |        |        |
|----------|------|------------|----|--------|--------|--------|
| 0.001    | E036 | 6_EnhG     | 30 | 0.5916 | 0.0032 | 0.9989 |
| 0.001    | E095 | 12_EnhBiv  | 4  | 0.5914 | 0.0004 | 0.8044 |
| 0.001    | E118 | 2_TssAFlnk | 49 | 0.5897 | 0.0053 | 1.0000 |
| 0.001    | E049 | 10_TssBiv  | 3  | 0.5886 | 0.0003 | 0.7484 |
| 1.00E-04 | E071 | 1_TssA     | 5  | 0.5844 | 0.0048 | 0.8556 |
| 0.001    | E022 | 12_EnhBiv  | 9  | 0.5830 | 0.0010 | 0.9433 |
| 0.001    | E012 | 12_EnhBiv  | 13 | 0.5818 | 0.0014 | 0.9764 |
| 0.001    | E018 | 10_TssBiv  | 22 | 0.5804 | 0.0024 | 0.9964 |
| 0.001    | E031 | 6_EnhG     | 18 | 0.5794 | 0.0019 | 0.9921 |
| 1.00E-04 | E129 | 1_TssA     | 4  | 0.5784 | 0.0038 | 0.8201 |
| 0.01     | E098 | 3_TxFlnk   | 7  | 0.5755 | 0.0001 | 0.9174 |
| 0.001    | E024 | 6_EnhG     | 12 | 0.5739 | 0.0013 | 0.9745 |
| 0.001    | E046 | 11_BivFlnk | 3  | 0.5736 | 0.0003 | 0.7659 |
| 0.01     | E003 | 3_TxFlnk   | 15 | 0.5735 | 0.0002 | 0.9868 |
| 0.001    | E044 | 12_EnhBiv  | 5  | 0.5731 | 0.0005 | 0.8666 |
| 1.00E-04 | E123 | 2_TssAFlnk | 4  | 0.5723 | 0.0038 | 0.8270 |
| 0.001    | E068 | 6_EnhG     | 13 | 0.5707 | 0.0014 | 0.9808 |
| 0.001    | E019 | 6_EnhG     | 5  | 0.5702 | 0.0005 | 0.8696 |
| 0.001    | E063 | 6_EnhG     | 21 | 0.5697 | 0.0023 | 0.9967 |
| 1.00E-04 | E027 | 1_TssA     | 5  | 0.5697 | 0.0048 | 0.8711 |
| 0.001    | E058 | 12_EnhBiv  | 8  | 0.5648 | 0.0009 | 0.9429 |
| 0.001    | E035 | 1_TssA     | 16 | 0.5626 | 0.0017 | 0.9918 |
| 0.001    | E011 | 12_EnhBiv  | 8  | 0.5616 | 0.0009 | 0.9452 |
| 0.001    | E042 | 6_EnhG     | 18 | 0.5594 | 0.0019 | 0.9953 |
| 1.00E-04 | E100 | 1_TssA     | 5  | 0.5580 | 0.0048 | 0.8829 |
| 0.001    | E038 | 6_EnhG     | 12 | 0.5569 | 0.0013 | 0.9812 |
| 0.001    | E023 | 3_TxFlnk   | 3  | 0.5568 | 0.0003 | 0.7853 |
| 0.001    | E037 | 6_EnhG     | 11 | 0.5567 | 0.0012 | 0.9760 |
| 1.00E-04 | E057 | 2_TssAFlnk | 3  | 0.5561 | 0.0029 | 0.7868 |
| 0.001    | E082 | 10_TssBiv  | 9  | 0.5521 | 0.0010 | 0.9628 |
| 0.001    | E023 | 12_EnhBiv  | 3  | 0.5514 | 0.0003 | 0.7916 |
| 1.00E-04 | E053 | 7_Enh      | 20 | 0.5495 | 0.0192 | 0.9981 |
| 0.001    | E078 | 10_TssBiv  | 8  | 0.5477 | 0.0009 | 0.9543 |
| 0.01     | E026 | 11_BivFlnk | 10 | 0.5462 | 0.0001 | 0.9740 |
| 1.00E-04 | E054 | 1_TssA     | 4  | 0.5453 | 0.0038 | 0.8564 |
| 1.00E-04 | E055 | 6_EnhG     | 5  | 0.5452 | 0.0048 | 0.8953 |
| 1.00E-04 | E097 | 1_TssA     | 5  | 0.5450 | 0.0048 | 0.8956 |
| 0.001    | E118 | 3_TxFlnk   | 3  | 0.5446 | 0.0003 | 0.7993 |
| 0.001    | E057 | 12_EnhBiv  | 7  | 0.5444 | 0.0008 | 0.9420 |
| 0.001    | E001 | 6_EnhG     | 4  | 0.5443 | 0.0004 | 0.8566 |
| 1.00E-04 | E116 | 1_TssA     | 5  | 0.5424 | 0.0048 | 0.8980 |
| 0.01     | E026 | 12_EnhBiv  | 16 | 0.5381 | 0.0002 | 0.9956 |
| 1.00E-04 | E118 | 2_TssAFlnk | 5  | 0.5376 | 0.0048 | 0.9024 |

|          |      |            |    |        |        |        |
|----------|------|------------|----|--------|--------|--------|
| 0.001    | E102 | 12_EnhBiv  | 3  | 0.5347 | 0.0003 | 0.8106 |
| 0.01     | E110 | 3_TxFlnk   | 3  | 0.5316 | 0.0000 | 0.8141 |
| 1.00E-04 | E025 | 6_EnhG     | 3  | 0.5312 | 0.0029 | 0.8152 |
| 0.01     | E116 | 10_TssBiv  | 14 | 0.5292 | 0.0001 | 0.9939 |
| 1.00E-04 | E061 | 1_TssA     | 3  | 0.5286 | 0.0029 | 0.8182 |
| 0.001    | E047 | 6_EnhG     | 9  | 0.5233 | 0.0010 | 0.9765 |
| 0.01     | E038 | 10_TssBiv  | 5  | 0.5227 | 0.0001 | 0.9146 |
| 0.001    | E067 | 6_EnhG     | 8  | 0.5183 | 0.0009 | 0.9703 |
| 1.00E-04 | E106 | 1_TssA     | 3  | 0.5180 | 0.0029 | 0.8300 |
| 0.001    | E057 | 11_BivFlnk | 6  | 0.5142 | 0.0006 | 0.9451 |
| 1.00E-04 | E020 | 7_Enh      | 14 | 0.5029 | 0.0134 | 0.9973 |
| 0.001    | E085 | 12_EnhBiv  | 7  | 0.5023 | 0.0008 | 0.9673 |
| 0.01     | E076 | 3_TxFlnk   | 10 | 0.5006 | 0.0001 | 0.9891 |
| 1.00E-04 | E076 | 1_TssA     | 4  | 0.5004 | 0.0038 | 0.9009 |
| 1.00E-04 | E116 | 2_TssAFlnk | 6  | 0.5001 | 0.0058 | 0.9550 |
| 0.001    | E020 | 11_BivFlnk | 6  | 0.4993 | 0.0006 | 0.9547 |
| 0.001    | E070 | 6_EnhG     | 6  | 0.4972 | 0.0006 | 0.9560 |
| 1.00E-04 | E049 | 2_TssAFlnk | 5  | 0.4969 | 0.0048 | 0.9361 |
| 0.001    | E112 | 10_TssBiv  | 7  | 0.4957 | 0.0008 | 0.9705 |
| 0.001    | E072 | 6_EnhG     | 13 | 0.4946 | 0.0014 | 0.9967 |
| 1.00E-04 | E103 | 1_TssA     | 5  | 0.4940 | 0.0048 | 0.9382 |
| 0.01     | E126 | 11_BivFlnk | 6  | 0.4937 | 0.0001 | 0.9579 |
| 0.001    | E021 | 12_EnhBiv  | 4  | 0.4916 | 0.0004 | 0.9081 |
| 0.001    | E019 | 11_BivFlnk | 7  | 0.4907 | 0.0008 | 0.9728 |
| 1.00E-04 | E112 | 1_TssA     | 3  | 0.4894 | 0.0029 | 0.8608 |
| 0.001    | E116 | 3_TxFlnk   | 10 | 0.4880 | 0.0011 | 0.9918 |
| 0.001    | E115 | 6_EnhG     | 22 | 0.4870 | 0.0024 | 0.9999 |
| 1.00E-04 | E114 | 2_TssAFlnk | 4  | 0.4869 | 0.0038 | 0.9129 |
| 0.001    | E024 | 12_EnhBiv  | 9  | 0.4836 | 0.0010 | 0.9891 |
| 1.00E-04 | E042 | 2_TssAFlnk | 3  | 0.4811 | 0.0029 | 0.8694 |
| 0.001    | E010 | 11_BivFlnk | 3  | 0.4785 | 0.0003 | 0.8713 |
| 1.00E-04 | E117 | 2_TssAFlnk | 4  | 0.4751 | 0.0038 | 0.9228 |
| 1.00E-04 | E077 | 1_TssA     | 4  | 0.4734 | 0.0038 | 0.9242 |
| 0.01     | E036 | 10_TssBiv  | 5  | 0.4725 | 0.0001 | 0.9520 |
| 0.001    | E010 | 6_EnhG     | 10 | 0.4721 | 0.0011 | 0.9944 |
| 1.00E-04 | E068 | 1_TssA     | 5  | 0.4718 | 0.0048 | 0.9532 |
| 0.001    | E016 | 11_BivFlnk | 4  | 0.4705 | 0.0004 | 0.9258 |
| 0.001    | E114 | 3_TxFlnk   | 7  | 0.4695 | 0.0008 | 0.9811 |
| 1.00E-04 | E045 | 1_TssA     | 3  | 0.4686 | 0.0029 | 0.8820 |
| 0.001    | E016 | 6_EnhG     | 6  | 0.4681 | 0.0006 | 0.9713 |
| 1.00E-04 | E098 | 1_TssA     | 3  | 0.4657 | 0.0029 | 0.8849 |
| 0.001    | E054 | 6_EnhG     | 8  | 0.4657 | 0.0009 | 0.9887 |
| 0.001    | E079 | 12_EnhBiv  | 3  | 0.4644 | 0.0003 | 0.8855 |



|          |      |            |    |        |        |        |
|----------|------|------------|----|--------|--------|--------|
| 1.00E-04 | E016 | 7_Enh      | 16 | 0.4627 | 0.0153 | 0.9997 |
| 0.001    | E111 | 3_TxFlnk   | 4  | 0.4553 | 0.0004 | 0.9374 |
| 0.001    | E107 | 10_TssBiv  | 4  | 0.4551 | 0.0004 | 0.9376 |
| 0.001    | E065 | 6_EnhG     | 3  | 0.4526 | 0.0003 | 0.8968 |
| 0.001    | E040 | 6_EnhG     | 8  | 0.4459 | 0.0009 | 0.9927 |
| 0.01     | E087 | 6_EnhG     | 3  | 0.4455 | 0.0000 | 0.9033 |
| 0.001    | E053 | 11_BivFlnk | 5  | 0.4454 | 0.0005 | 0.9673 |
| 0.001    | E020 | 3_TxFlnk   | 3  | 0.4420 | 0.0003 | 0.9065 |
| 1.00E-04 | E105 | 1_TssA     | 4  | 0.4403 | 0.0038 | 0.9486 |
| 0.001    | E048 | 6_EnhG     | 7  | 0.4378 | 0.0008 | 0.9900 |
| 1.00E-04 | E078 | 1_TssA     | 4  | 0.4370 | 0.0038 | 0.9507 |
| 0.001    | E018 | 11_BivFlnk | 5  | 0.4338 | 0.0005 | 0.9728 |
| 0.001    | E082 | 6_EnhG     | 5  | 0.4331 | 0.0005 | 0.9731 |
| 1.00E-04 | E021 | 7_Enh      | 7  | 0.4319 | 0.0067 | 0.9916 |
| 0.001    | E076 | 6_EnhG     | 8  | 0.4307 | 0.0009 | 0.9950 |
| 1.00E-04 | E123 | 7_Enh      | 12 | 0.4274 | 0.0115 | 0.9995 |
| 1.00E-04 | E067 | 1_TssA     | 4  | 0.4243 | 0.0038 | 0.9585 |
| 1.00E-04 | E072 | 1_TssA     | 4  | 0.4225 | 0.0038 | 0.9595 |
| 1.00E-04 | E117 | 1_TssA     | 3  | 0.4209 | 0.0029 | 0.9253 |
| 1.00E-04 | E073 | 1_TssA     | 4  | 0.4173 | 0.0038 | 0.9625 |
| 0.01     | E083 | 3_TxFlnk   | 3  | 0.4085 | 0.0000 | 0.9345 |
| 0.001    | E058 | 10_TssBiv  | 4  | 0.4049 | 0.0004 | 0.9685 |
| 0.001    | E005 | 12_EnhBiv  | 4  | 0.4030 | 0.0004 | 0.9694 |
| 0.001    | E002 | 12_EnhBiv  | 4  | 0.4014 | 0.0004 | 0.9701 |
| 0.001    | E115 | 3_TxFlnk   | 8  | 0.3998 | 0.0009 | 0.9979 |
| 0.001    | E014 | 6_EnhG     | 5  | 0.3979 | 0.0005 | 0.9858 |
| 0.001    | E054 | 11_BivFlnk | 3  | 0.3966 | 0.0003 | 0.9434 |
| 0.001    | E041 | 11_BivFlnk | 3  | 0.3738 | 0.0003 | 0.9584 |
| 0.001    | E070 | 12_EnhBiv  | 4  | 0.3698 | 0.0004 | 0.9830 |
| 0.001    | E069 | 6_EnhG     | 8  | 0.3638 | 0.0009 | 0.9994 |
| 0.001    | E058 | 3_TxFlnk   | 4  | 0.3575 | 0.0004 | 0.9868 |
| 0.001    | E077 | 10_TssBiv  | 3  | 0.3524 | 0.0003 | 0.9702 |
| 1.00E-04 | E008 | 7_Enh      | 6  | 0.3485 | 0.0058 | 0.9983 |
| 0.001    | E033 | 10_TssBiv  | 3  | 0.3190 | 0.0003 | 0.9841 |
| 1.00E-04 | E033 | 7_Enh      | 6  | 0.2746 | 0.0058 | 0.9999 |
| 0.001    | E009 | 12_EnhBiv  | 4  | 0.2488 | 0.0004 | 0.9996 |

| q-value | Roadmap Gr    | Roadmap Epi    | Anatomy            |
|---------|---------------|----------------|--------------------|
| 0.0024  | Other         | Ovary          | OVARY              |
| 0.0007  | ES-deriv      | H1 BMP4 Der    | ESC_DERIVED        |
| 0.0001  | Blood & T-cel | Primary T cell | BLOOD              |
| 0.0092  | HSC & B-cell  | Primary hem    | BLOOD              |
| 0.0000  | Brain         | Brain Hippoc   | BRAIN              |
| 0.0002  | Mesench       | Mesenchyma     | STROMAL_CONNECTIVE |
| 0.0024  | Mesench       | Mesenchyma     | FAT                |
| 0.0032  | Myosat        | Muscle Satell  | MUSCLE             |
| 0.0018  | Blood & T-cel | Primary mon    | BLOOD              |
| 0.0018  | Brain         | Brain Cingula  | BRAIN              |
| 0.0000  | HSC & B-cell  | Primary neut   | BLOOD              |
| 0.0006  | HSC & B-cell  | Primary hem    | BLOOD              |
| 0.0007  | Blood & T-cel | Primary T CD   | BLOOD              |
| 0.0085  | Muscle        | Fetal Muscle   | MUSCLE             |
| 0.0344  | Neurosph      | Ganglion Emi   | BRAIN              |
| 0.0094  | ENCODE2012    | Osteoblast Pr  | BONE               |
| 0.0094  | ENCODE2012    | HSMM Skelet    | MUSCLE             |
| 0.0254  | Muscle        | Fetal Muscle   | MUSCLE_LEG         |
| 0.0085  | HSC & B-cell  | Primary B cell | BLOOD              |
| 0.0140  | Muscle        | Fetal Muscle   | MUSCLE_LEG         |
| 0.0001  | HSC & B-cell  | Primary hem    | BLOOD              |
| 0.0459  | ES-deriv      | H1 BMP4 Der    | ESC_DERIVED        |
| 0.0465  | ENCODE2012    | HSMM cell de   | MUSCLE             |
| 0.0484  | ENCODE2012    | NH-A Astrocy   | BRAIN              |
| 0.0363  | Muscle        | Fetal Muscle   | MUSCLE_LEG         |
| 0.0535  | Brain         | Brain Angular  | BRAIN              |
| 0.0548  | ESC           | ES-UCSF4 Cel   | ESC                |
| 0.0170  | Other         | Ovary          | OVARY              |
| 0.0579  | IMR90         | IMR90 fetal l  | LUNG               |
| 0.0600  | Epithelial    | Breast Myoe    | BREAST             |
| 0.0607  | Brain         | Brain Anterio  | BRAIN              |
| 0.0007  | HSC & B-cell  | Primary B cell | BLOOD              |
| 0.0126  | Brain         | Fetal Brain Fe | BRAIN              |
| 0.0610  | Other         | Fetal Adrenal  | ADRENAL            |
| 0.0094  | Blood & T-cel | Primary T hel  | BLOOD              |
| 0.0036  | HSC & B-cell  | Primary hem    | BLOOD              |
| 0.0363  | ES-deriv      | hESC Derived   | ESC_DERIVED        |
| 0.0151  | ENCODE2012    | Monocytes-C    | BLOOD              |
| 0.0000  | Mesench       | Mesenchyma     | STROMAL_CONNECTIVE |
| 0.0661  | ENCODE2012    | NH-A Astrocy   | BRAIN              |
| 0.0016  | ENCODE2012    | Monocytes-C    | BLOOD              |
| 0.0679  | ES-deriv      | H9 Derived N   | ESC_DERIVED        |

|        |               |                |             |
|--------|---------------|----------------|-------------|
| 0.0002 | Sm. Muscle    | Stomach Smo    | GI_STOMACH  |
| 0.0691 | Digestive     | Sigmoid Coloi  | GI_COLON    |
| 0.0462 | iPSC          | iPS DF 6.9 Cel | IPSC        |
| 0.0713 | Muscle        | Skeletal Musc  | MUSCLE      |
| 0.0092 | HSC & B-cell  | Primary Natu   | BLOOD       |
| 0.0760 | Neurosph      | Ganglion Emi   | BRAIN       |
| 0.0628 | Brain         | Brain Cingula  | BRAIN       |
| 0.0288 | IMR90         | IMR90 fetal lu | LUNG        |
| 0.0198 | HSC & B-cell  | Primary monc   | BLOOD       |
| 0.0306 | ENCODE2012    | A549 EtOH 0.   | LUNG        |
| 0.0852 | Epithelial    | Breast varian  | BREAST      |
| 0.0865 | Brain         | Brain Inferior | BRAIN       |
| 0.0578 | Epithelial    | Breast Myoe    | BREAST      |
| 0.0881 | Muscle        | Psoas Muscle   | MUSCLE      |
| 0.0602 | Digestive     | Gastric        | GI_STOMACH  |
| 0.0602 | ESC           | ES-WA7 Cells   | ESC         |
| 0.0973 | Brain         | Brain_Dorsol   | BRAIN       |
| 0.0982 | Other         | Spleen         | SPLEEN      |
| 0.1000 | ES-deriv      | hESC Derived   | ESC_DERIVED |
| 0.0092 | Muscle        | Skeletal Musc  | MUSCLE      |
| 0.1072 | Heart         | Right Atrium   | HEART       |
| 0.0848 | ENCODE2012    | HMEC Mamr      | BREAST      |
| 0.0344 | Brain         | Fetal Brain M  | BRAIN       |
| 0.0848 | Digestive     | Rectal Mucos   | GI_RECTUM   |
| 0.0548 | ES-deriv      | hESC Derived   | ESC_DERIVED |
| 0.0627 | Brain         | Brain Germin   | BRAIN       |
| 0.1146 | Mesench       | Adipose Deriv  | FAT         |
| 0.0008 | Brain         | Brain Hippoca  | BRAIN       |
| 0.1211 | Other         | Pancreas       | PANCREAS    |
| 0.1276 | Other         | Placenta Amr   | PLACENTA    |
| 0.0849 | ESC           | H9 Cells       | ESC         |
| 0.0330 | Other         | Liver          | LIVER       |
| 0.0508 | HSC & B-cell  | Primary monc   | BLOOD       |
| 0.0018 | Other         | Ovary          | OVARY       |
| 0.0874 | Sm. Muscle    | Rectal Smoot   | GI_RECTUM   |
| 0.0253 | Blood & T-cel | Primary T cell | BLOOD       |
| 0.1110 | iPSC          | iPS DF 19.11   | IPSC        |
| 0.1115 | ES-deriv      | hESC Derived   | ESC_DERIVED |
| 0.0610 | ENCODE2012    | HUVEC Umbil    | VASCULAR    |
| 0.1389 | ES-deriv      | H1 BMP4 Der    | ESC_DERIVED |
| 0.0681 | Heart         | Right Ventricl | HEART       |
| 0.0451 | Mesench       | Mesenchyma     | FAT         |
| 0.0486 | ENCODE2012    | HSMM Skelet    | MUSCLE      |

0.1183 Epithelial Foreskin Mel; SKIN  
 0.1441 ES-deriv hESC Derived ESC\_DERIVED  
 0.1460 ESC ES-WA7 Cells ESC  
 0.0330 IMR90 IMR90 fetal L LUNG  
 0.0486 Blood & T-cel Primary T cell BLOOD  
 0.0567 iPSC iPS DF 6.9 Cell IPSC  
 0.1099 Other Fetal Lung LUNG  
 0.1306 Digestive Esophagus GI\_ESOPHAGUS  
 0.1605 Heart Fetal Heart HEART  
 0.1334 Sm. Muscle Stomach Smo GI\_STOMACH  
 0.1000 Digestive Gastric GI\_STOMACH  
 0.0293 Epithelial Foreskin Fibro SKIN  
 0.1656 HSC & B-cell Primary neutro BLOOD  
 0.1656 Other Placenta Amr PLACENTA  
 0.0375 Other Spleen SPLEEN  
 0.1428 Brain Brain Inferior BRAIN  
 0.1695 iPSC iPS-20b Cells IPSC  
 0.1251 Digestive Fetal Stomach GI\_STOMACH  
 0.0679 ES-deriv hESC Derived ESC\_DERIVED  
 0.1737 Muscle Fetal Muscle MUSCLE  
 0.1579 ENCODE2012 A549 EtOH 0. LUNG  
 0.0094 Other Ovary OVARY  
 0.1183 Digestive Esophagus GI\_ESOPHAGUS  
 0.0892 Brain Brain Substar BRAIN  
 0.0001 ENCODE2012 HUVEC Umbil VASCULAR  
 0.1100 Brain Brain Angular BRAIN  
 0.1108 HSC & B-cell Primary hem; BLOOD  
 0.1236 ENCODE2012 HUVEC Umbil VASCULAR  
 0.0422 iPSC iPS DF 19.11 IPSC  
 0.1146 ENCODE2012 HeLa-S3 Cervi CERVIX  
 0.0486 Other Placenta Amr PLACENTA  
 0.1205 Brain Brain\_Dorsol; BRAIN  
 0.0065 Other Fetal Kidney KIDNEY  
 0.1164 Myosat Muscle Satell MUSCLE  
 0.2003 Sm. Muscle Rectal Smoot GI\_RECTUM  
 0.2003 Epithelial Foreskin Mel; SKIN  
 0.0983 Heart Left Ventricle HEART  
 0.1788 Digestive Stomach Muc GI\_STOMACH  
 0.0124 Muscle Fetal Muscle MUSCLE  
 0.0008 Heart Right Ventricle HEART  
 0.0997 Other Placenta PLACENTA  
 0.0737 Blood & T-cel Primary mono BLOOD  
 0.0681 ENCODE2012 HSMM Skelet MUSCLE

|        |              |                |              |
|--------|--------------|----------------|--------------|
| 0.1428 | Epithelial   | Foreskin Fibr  | SKIN         |
| 0.1303 | Other        | Fetal Adrenal  | ADRENAL      |
| 0.2077 | HSC & B-cell | Primary hem    | BLOOD        |
| 0.0635 | Other        | Fetal Adrenal  | ADRENAL      |
| 0.0818 | Brain        | Brain Cingula  | BRAIN        |
| 0.0745 | ES-deriv     | H1 Derived N   | ESC_DERIVED  |
| 0.0991 | Other        | Placenta       | PLACENTA     |
| 0.1931 | Muscle       | Skeletal Musc  | MUSCLE       |
| 0.1951 | Muscle       | Psoas Muscle   | MUSCLE       |
| 0.0770 | Digestive    | Fetal Stomac   | GI_STOMACH   |
| 0.1963 | Heart        | Right Ventricl | HEART        |
| 0.1605 | Brain        | Brain Hippoc   | BRAIN        |
| 0.2166 | Epithelial   | Foreskin Kera  | SKIN         |
| 0.2166 | Sm. Muscle   | Stomach Smo    | GI_STOMACH   |
| 0.1968 | Epithelial   | Foreskin Fibr  | SKIN         |
| 0.1628 | ES-deriv     | H1 BMP4 Der    | ESC_DERIVED  |
| 0.0435 | Other        | Ovary          | OVARY        |
| 0.1080 | ES-deriv     | H1 BMP4 Der    | ESC_DERIVED  |
| 0.0242 | Other        | Liver          | LIVER        |
| 0.1788 | ENCODE2012   | HSMM Skelet    | MUSCLE       |
| 0.2025 | ENCODE2012   | HeLa-S3 Cervi  | CERVIX       |
| 0.0094 | Epithelial   | Foreskin Fibr  | SKIN         |
| 0.0787 | ENCODE2012   | HeLa-S3 Cervi  | CERVIX       |
| 0.0643 | HSC & B-cell | Primary hem    | BLOOD        |
| 0.1253 | ENCODE2012   | NH-A Astrocy   | BRAIN        |
| 0.0094 | Neurosph     | Cortex derive  | BRAIN        |
| 0.0947 | ENCODE2012   | NH-A Astrocy   | BRAIN        |
| 0.2250 | Other        | Liver          | LIVER        |
| 0.2283 | ESC          | H1 Cells       | ESC          |
| 0.1605 | Heart        | Fetal Heart    | HEART        |
| 0.1712 | Muscle       | Skeletal Musc  | MUSCLE       |
| 0.1724 | Adipose      | Adipose Nucl   | FAT          |
| 0.0459 | Other        | Pancreatic Isl | PANCREAS     |
| 0.1236 | ES-deriv     | H1 BMP4 Der    | ESC_DERIVED  |
| 0.1915 | iPSC         | iPS DF 19.11   | (IPSC        |
| 0.2336 | Heart        | Right Atrium   | HEART        |
| 0.0060 | Digestive    | Esophagus      | GI_ESOPHAGUS |
| 0.0987 | Neurosph     | Ganglion Emi   | BRAIN        |
| 0.2351 | Sm. Muscle   | Duodenum Sr    | GI_DUODENUM  |
| 0.1861 | Heart        | Aorta          | VASCULAR     |
| 0.1101 | Digestive    | Sigmoid Color  | GI_COLON     |
| 0.2415 | Sm. Muscle   | Duodenum Sr    | GI_DUODENUM  |
| 0.0085 | Heart        | Right Atrium   | HEART        |

0.1902 iPSC iPSC-18 Cells IPSC  
 0.2243 Brain Brain\_Dorsol B BRAIN  
 0.2247 Other Liver LIVER  
 0.0679 iPSC iPSC DF 6.9 Cell IPSC  
 0.1776 Digestive Fetal Intestine GI\_INTESTINE  
 0.0330 Blood & T-cell Primary T cell BLOOD  
 0.2243 Digestive Rectal Mucosa GI\_RECTUM  
 0.2056 Sm. Muscle Colon Smooth GI\_COLON  
 0.2506 Brain Brain Angular BRAIN  
 0.0018 Epithelial Foreskin Mel SKIN  
 0.1985 Other Placenta PLACENTA  
 0.1715 Heart Right Atrium HEART  
 0.2547 ES-deriv hESC Derived ESC\_DERIVED  
 0.1892 Sm. Muscle Colon Smooth GI\_COLON  
 0.1774 ENCODE2012 HSMM cell de MUSCLE  
 0.1776 Myosat Muscle Satell MUSCLE  
 0.1664 Other Ovary OVARY  
 0.2211 Brain Brain Inferior BRAIN  
 0.0206 HSC & B-cell Primary neut BLOOD  
 0.2079 ENCODE2012 NH-A Astrocyte BRAIN  
 0.2040 Other Fetal Lung LUNG  
 0.1724 Blood & T-cell Primary T cell BLOOD  
 0.0707 ENCODE2012 NHLF Lung Fil LUNG  
 0.0462 Blood & T-cell Primary T cell BLOOD  
 0.2705 Adipose Adipose Nucl FAT  
 0.2034 Sm. Muscle Rectal Smooth GI\_RECTUM  
 0.0032 HSC & B-cell Primary B cell BLOOD  
 0.2211 Muscle Fetal Muscle MUSCLE\_LEG  
 0.1347 ES-deriv hESC Derived ESC\_DERIVED  
 0.1059 Heart Fetal Heart HEART  
 0.0601 ENCODE2012 HeLa-S3 Cervix CERVIX  
 0.0128 Other Liver LIVER  
 0.1596 ES-deriv H1 BMP4 Der ESC\_DERIVED  
 0.0115 Other Fetal Adrenal ADRENAL  
 0.0026 HSC & B-cell Primary Natu BLOOD  
 0.1784 Digestive Fetal Stomach GI\_STOMACH  
 0.1520 Brain Brain Hippoc BRAIN  
 0.1605 Muscle Fetal Muscle MUSCLE  
 0.1641 Blood & T-cell Primary T cell BLOOD  
 0.2703 HSC & B-cell Primary hem BLOOD  
 0.0627 ENCODE2012 Dnd41 TCell L BLOOD  
 0.2529 ESC HUES48 Cells ESC  
 0.0643 Sm. Muscle Stomach Smooth GI\_STOMACH

0.1419 Blood & T-cell Primary T CD8 BLOOD  
 0.0092 Other Placenta PLACENTA  
 0.2391 Brain Brain Substar BRAIN  
 0.2397 Neurosph Ganglion Emi BRAIN  
 0.1554 HSC & B-cell Primary hemæ BLOOD  
 0.2049 Blood & T-cell Primary T hel BLOOD  
 0.2629 Heart Right Ventricle HEART  
 0.1426 ENCODE2012 HSMM Skelet MUSCLE  
 0.2183 Muscle Skeletal Musc MUSCLE  
 0.0132 ES-deriv H1 Derived N ESC\_DERIVED  
 0.2211 ENCODE2012 NHLF Lung Fil LUNG  
 0.0456 Blood & T-cell Primary T hel BLOOD  
 0.1883 Blood & T-cell Primary T reg BLOOD  
 0.0209 Digestive Duodenum M GI\_DUODENUM  
 0.2351 Brain Brain Germin BRAIN  
 0.1895 Muscle Fetal Muscle MUSCLE\_LEG  
 0.2234 Neurosph Cortex derive BRAIN  
 0.1014 Digestive Rectal Mucos GI\_RECTUM  
 0.2530 Heart Right Ventricle HEART  
 0.0486 Blood & T-cell Primary T hel BLOOD  
 0.2410 Brain Brain\_Dorsolæ BRAIN  
 0.2692 Epithelial Foreskin Kera SKIN  
 0.1963 Epithelial Breast Myoeç BREAST  
 0.2590 ESC ES-I3 Cells ESC  
 0.1054 Brain Brain Cingulaæ BRAIN  
 0.0145 ENCODE2012 HUVEC Umbil VASCULAR  
 0.1902 Brain Brain Inferior BRAIN  
 0.2625 HSC & B-cell Primary hemæ BLOOD  
 0.0002 Epithelial Foreskin Melæ SKIN  
 0.0344 ENCODE2012 Osteoblast Pr BONE  
 0.3199 Other Ovary OVARY  
 0.0558 Adipose Adipose Nuclæ FAT  
 0.0858 HSC & B-cell Primary hemæ BLOOD  
 0.0114 Heart Fetal Heart HEART  
 0.0486 Heart Left Ventricle HEART  
 0.1372 Epithelial Foreskin Melæ SKIN  
 0.2558 Other Fetal Lung LUNG  
 0.3267 Blood & T-cell Primary T hel BLOOD  
 0.0865 HSC & B-cell Primary hemæ BLOOD  
 0.2735 ENCODE2012 Dnd41 TCell L BLOOD  
 0.2209 ENCODE2012 HeLa-S3 Cervi CERVIX  
 0.0946 ENCODE2012 NH-A Astrocy BRAIN  
 0.2449 Other Fetal Kidney KIDNEY

0.3288 HSC & B-cell Primary hemæ BLOOD  
 0.1579 ESC H9 Cells ESC  
 0.2024 Mesench Bone Marrow STROMAL\_CONNECTIVE  
 0.3306 Blood & T-cel Primary T CD8 BLOOD  
 0.2475 ENCODE2012 Osteoblast Pr BONE  
 0.2954 ES-deriv H1 Derived M ESC\_DERIVED  
 0.0671 Brain Brain Inferior BRAIN  
 0.0252 ES-deriv H1 Derived M ESC\_DERIVED  
 0.3108 ES-deriv hESC Derived ESC\_DERIVED  
 0.2805 ENCODE2012 HMEC Mamr BREAST  
 0.0630 Brain Brain Anterio BRAIN  
 0.2805 ESC HUES64 Cells ESC  
 0.2815 iPSC iPS-20b Cells IPSC  
 0.0486 Other Lung LUNG  
 0.0737 Heart Left Ventricle HEART  
 0.3033 ES-deriv H1 Derived N ESC\_DERIVED  
 0.2439 Other Lung LUNG  
 0.0641 ENCODE2012 HSMM Skelet MUSCLE  
 0.2705 Brain Brain Inferior BRAIN  
 0.2451 Heart Aorta VASCULAR  
 0.2731 ENCODE2012 HMEC Mamr BREAST  
 0.1641 Other Spleen SPLEEN  
 0.3402 Epithelial Foreskin Kera SKIN  
 0.3278 Brain Brain\_Dorsol: BRAIN  
 0.3398 Other Placenta Amr PLACENTA  
 0.3288 Brain Fetal Brain M BRAIN  
 0.0002 Epithelial Foreskin Mel: SKIN  
 0.2205 Other Liver LIVER  
 0.0386 Epithelial Breast Myoe: BREAST  
 0.0679 Mesench Bone Marrow STROMAL\_CONNECTIVE  
 0.0151 ENCODE2012 HSMM Skelet MUSCLE  
 0.0894 Digestive Duodenum M GI\_DUODENUM  
 0.2829 Blood & T-cel Primary T CD4 BLOOD  
 0.3000 Blood & T-cel Primary T reg BLOOD  
 0.0517 ENCODE2012 Dnd41 TCell L BLOOD  
 0.2560 Mesench Mesenchyma STROMAL\_CONNECTIVE  
 0.0635 Epithelial Foreskin Fibr: SKIN  
 0.3345 Blood & T-cel Primary mon: BLOOD  
 0.0105 ES-deriv H1 BMP4 Der ESC\_DERIVED  
 0.0210 HSC & B-cell Primary B cell BLOOD  
 0.0635 ENCODE2012 NHLF Lung Fil LUNG  
 0.2086 ESC H1 Cells ESC  
 0.1285 Other Fetal Lung LUNG



0.2752 Mesench Mesenchyma STROMAL\_CONNECTIVE  
 0.0538 Muscle Fetal Muscle MUSCLE\_LEG  
 0.0432 Digestive Rectal Mucos GI\_RECTUM  
 0.2919 ENCODE2012 HUVEC Umbil VASCULAR  
 0.1668 Digestive Small Intestin GI\_INTESTINE  
 0.1790 ESC ES-WA7 Cells ESC  
 0.2808 Blood & T-cel Primary T hel BLOOD  
 0.0094 HSC & B-cell Primary neut BLOOD  
 0.3596 ENCODE2012 HSMM Skelet MUSCLE  
 0.1825 Blood & T-cel Primary T CD8 BLOOD  
 0.2696 Blood & T-cel Primary T hel BLOOD  
 0.1255 Sm. Muscle Rectal Smoot GI\_RECTUM  
 0.3623 Epithelial Foreskin Fibro SKIN  
 0.3031 ES-deriv H1 Derived M ESC\_DERIVED  
 0.3331 Sm. Muscle Duodenum Sr GI\_DUODENUM  
 0.2415 Other Spleen SPLEEN  
 0.0979 Other Ovary OVARY  
 0.0414 HSC & B-cell Primary hem BLOOD  
 0.0579 ES-deriv H9 Derived N ESC\_DERIVED  
 0.2115 Heart Fetal Heart HEART  
 0.1815 Blood & T-cel Primary T hel BLOOD  
 0.1769 Other Fetal Kidney KIDNEY  
 0.2821 ENCODE2012 Osteoblast Pr BONE  
 0.1470 HSC & B-cell Primary hem BLOOD  
 0.1251 ENCODE2012 A549 EtOH 0. LUNG  
 0.0607 Blood & T-cel Primary T cell BLOOD  
 0.1613 ENCODE2012 A549 EtOH 0. LUNG  
 0.1401 Other Lung LUNG  
 0.3743 Neurosph Cortex derive BRAIN  
 0.0085 Muscle Skeletal Musc MUSCLE  
 0.0548 Mesench Adipose Deriv FAT  
 0.1915 Sm. Muscle Rectal Smoot GI\_RECTUM  
 0.3647 Heart Right Ventricl HEART  
 0.0892 Muscle Psoas Muscle MUSCLE  
 0.1170 Digestive Fetal Intestin GI\_INTESTINE  
 0.0847 ENCODE2012 Osteoblast Pr BONE  
 0.2510 Digestive Sigmoid Coloi GI\_COLON  
 0.1213 Other Spleen SPLEEN  
 0.3794 Brain Brain Angular BRAIN  
 0.3819 Brain Brain Hippoc BRAIN  
 0.1041 ENCODE2012 HUVEC Umbil VASCULAR  
 0.3049 ENCODE2012 HSMM cell de MUSCLE  
 0.2910 Other Fetal Adrenal ADRENAL

0.1410 Blood & T-cel Primary T CD8 BLOOD  
 0.0888 ENCODE2012 Osteoblast Pr BONE  
 0.0834 ENCODE2012 NHDF-Ad Adu SKIN  
 0.3778 Brain Brain Anterio BRAIN  
 0.1432 Blood & T-cel Primary mono BLOOD  
 0.0079 iPSC iPS DF 19.11 (IPSC  
 0.1024 ENCODE2012 NH-A Astrocy BRAIN  
 0.1485 Muscle Fetal Muscle MUSCLE  
 0.2243 ENCODE2012 Monocytes-C BLOOD  
 0.0465 Other Placenta PLACENTA  
 0.1716 Brain Brain Hippoc BRAIN  
 0.1641 Other Placenta Amr PLACENTA  
 0.1314 ENCODE2012 NH-A Astrocy BRAIN  
 0.0375 Digestive Fetal Intestine GI\_INTESTINE  
 0.1867 Brain Brain\_Dorsol BRAIN  
 0.0085 Blood & T-cel Primary T cell BLOOD  
 0.3896 Other Pancreas PANCREAS  
 0.0706 Blood & T-cel Primary T cell BLOOD  
 0.0558 Sm. Muscle Colon Smooth GI\_COLON  
 0.1005 Heart Left Ventricle HEART  
 0.1181 HSC & B-cell Primary B cell BLOOD  
 0.1963 ENCODE2012 HSMM cell de MUSCLE  
 0.3237 Epithelial Breast varian BREAST  
 0.1621 ENCODE2012 NHLF Lung Fil LUNG  
 0.2949 Brain Brain Cingula BRAIN  
 0.1144 Myosat Muscle Satell MUSCLE  
 0.0865 ES-deriv H1 BMP4 Der ESC\_DERIVED  
 0.4028 Heart Right Ventricle HEART  
 0.1099 Mesench Mesenchyma STROMAL\_CONNECTIVE  
 0.0484 HSC & B-cell Primary hem BLOOD  
 0.0459 Brain Brain Hippoc BRAIN  
 0.4059 ENCODE2012 HSMM cell de MUSCLE  
 0.2555 ENCODE2012 HMEC Mamr BREAST  
 0.4074 Brain Brain Germin BRAIN  
 0.4074 Neurosph Cortex derive BRAIN  
 0.2020 Heart Right Ventricle HEART  
 0.0548 Blood & T-cel Primary T hel BLOOD  
 0.3987 Digestive Fetal Intestine GI\_INTESTINE  
 0.2295 Digestive Gastric GI\_STOMACH  
 0.0085 Blood & T-cel Primary T hel BLOOD  
 0.1428 Muscle Skeletal Musc MUSCLE  
 0.2605 Blood & T-cel Primary T cell BLOOD  
 0.1399 ENCODE2012 HUVEC Umbil VASCULAR

0.1579 ES-deriv H1 BMP4 Der ESC\_DERIVED  
 0.3752 Epithelial Breast Myoe $\xi$  BREAST  
 0.3853 Brain Brain Cingula $\xi$  BRAIN  
 0.3933 ENCODE2012 HepG2 Hepat LIVER  
 0.3119 Other Placenta Amr PLACENTA  
 0.3547 Muscle Skeletal Musc MUSCLE  
 0.1384 Brain Brain Substar BRAIN  
 0.3233 Heart Aorta VASCULAR  
 0.3331 Muscle Skeletal Musc MUSCLE  
 0.3162 ESC HUES48 Cells ESC  
 0.1152 Blood & T-cel Primary T cell BLOOD  
 0.1415 Adipose Adipose Nucl $\xi$  FAT  
 0.0344 Blood & T-cel Primary T reg BLOOD  
 0.3931 Myosat Muscle Satell MUSCLE  
 0.4027 Digestive Colonic Muco GI\_COLON  
 0.4172 ES-deriv H1 Derived M ESC\_DERIVED  
 0.2324 Digestive Esophagus GI\_ESOPHAGUS  
 0.0628 HSC & B-cell Primary mon $\xi$  BLOOD  
 0.1664 ENCODE2012 HSMM cell de MUSCLE  
 0.4180 ESC H1 Cells ESC  
 0.0628 Digestive Colonic Muco GI\_COLON  
 0.3417 Muscle Skeletal Musc MUSCLE  
 0.2207 Blood & T-cel Primary T cell BLOOD  
 0.4070 ENCODE2012 NHDF-Ad Ad $\xi$  SKIN  
 0.2554 Digestive Rectal Mucos GI\_RECTUM  
 0.2449 Mesench Mesenchyma FAT  
 0.3376 Mesench Adipose Deriv FAT  
 0.3916 ESC H9 Cells ESC  
 0.0833 ENCODE2012 HUVEC Umbil VASCULAR  
 0.1071 Epithelial Breast Myoe $\xi$  BREAST  
 0.2545 Blood & T-cel Primary T hel BLOOD  
 0.0018 Heart Right Ventricl HEART  
 0.2788 Blood & T-cel Primary T hel BLOOD  
 0.0385 Other Lung LUNG  
 0.4163 ES-deriv hESC Derived ESC\_DERIVED  
 0.1314 ENCODE2012 HSMM cell de MUSCLE  
 0.3328 Adipose Adipose Nucl $\xi$  FAT  
 0.1366 Myosat Muscle Satell MUSCLE  
 0.2476 HSC & B-cell Primary hem $\xi$  BLOOD  
 0.4180 Muscle Skeletal Musc MUSCLE  
 0.3455 Epithelial Foreskin Mel $\xi$  SKIN  
 0.4263 Digestive Stomach Muc GI\_STOMACH  
 0.3211 ES-deriv H1 Derived N ESC\_DERIVED

0.1438 Muscle Skeletal Musc MUSCLE  
0.1183 Blood & T-cel Primary T hel BLOOD  
0.2901 ES-deriv hESC Derived ESC\_DERIVED  
0.0085 HSC & B-cell Primary B cell BLOOD  
0.2056 Digestive Esophagus GI\_ESOPHAGUS  
0.1968 Sm. Muscle Duodenum Sr GI\_DUODENUM  
0.2304 Brain Fetal Brain M BRAIN  
0.1664 HSC & B-cell Primary Natu BLOOD  
0.1668 ENCODE2012 HMEC Mamr BREAST  
0.4251 Epithelial Foreskin Mel: SKIN  
0.2663 Digestive Fetal Stomac GI\_STOMACH  
0.4098 Other Pancreatic Isl: PANCREAS  
0.4100 HSC & B-cell Primary hem: BLOOD  
0.0679 Blood & T-cel Primary T CD: BLOOD  
0.3966 Blood & T-cel Primary T cell BLOOD  
0.1880 Sm. Muscle Stomach Smo GI\_STOMACH  
0.2997 Blood & T-cel Primary T hel BLOOD  
0.2249 Brain Brain\_Dorsol: BRAIN  
0.0189 ENCODE2012 HeLa-S3 Cervi CERVIX  
0.4164 Mesench Mesenchyma STROMAL\_CONNECTIVE  
0.1915 Muscle Skeletal Musc MUSCLE  
0.1769 Brain Brain Cingula: BRAIN  
0.1980 Myosat Muscle Satell MUSCLE  
0.3415 Brain Brain Substar BRAIN  
0.2827 Epithelial Foreskin Mel: SKIN  
0.2025 Blood & T-cel Primary T hel BLOOD  
0.3850 Digestive Fetal Intestin: GI\_INTESTINE  
0.2248 Brain Brain Angular BRAIN  
0.3242 Digestive Fetal Stomac GI\_STOMACH  
0.4452 Other Placenta Amr PLACENTA  
0.3997 Digestive Sigmoid Color GI\_COLON  
0.2271 Brain Brain\_Dorsol: BRAIN  
0.3303 ESC ES-WA7 Cells ESC  
0.0152 HSC & B-cell Primary hem: BLOOD  
0.1303 Blood & T-cel Primary T cell BLOOD  
0.4117 Epithelial Foreskin Fibrc SKIN  
0.0848 ESC ES-UCSF4 Cel ESC  
0.4289 Muscle Fetal Muscle : MUSCLE  
0.2166 Digestive Fetal Intestin: GI\_INTESTINE  
0.0094 Other Pancreas PANCREAS  
0.2025 Epithelial Foreskin Mel: SKIN  
0.4456 Brain Fetal Brain Fe BRAIN  
0.3547 iPSC iPS DF 19.11 (IPSC

0.3720 Muscle Psoas Muscle MUSCLE  
 0.4167 Other Liver LIVER  
 0.4413 ENCODE2012 NHDF-Ad Adu SKIN  
 0.1985 ENCODE2012 NH-A Astrocy BRAIN  
 0.2284 HSC & B-cell Primary hemæ BLOOD  
 0.1780 Thymus Thymus THYMUS  
 0.0834 Thymus Fetal Thymus THYMUS  
 0.4524 ENCODE2012 NHEK-Epiderr SKIN  
 0.0018 Epithelial Foreskin Fibrc SKIN  
 0.2786 HSC & B-cell Primary B cell BLOOD  
 0.1236 Brain Fetal Brain Fe BRAIN  
 0.1788 ENCODE2012 NHLF Lung Fil LUNG  
 0.3521 HSC & B-cell Primary monç BLOOD  
 0.2155 HSC & B-cell Primary hemæ BLOOD  
 0.3529 ES-deriv hESC Derived ESC\_DERIVED  
 0.2818 Sm. Muscle Colon Smoothf GI\_COLON  
 0.4577 Brain Brain Cingulaç BRAIN  
 0.4562 Heart Right Atrium HEART  
 0.1481 ENCODE2012 HeLa-S3 Cervi CERVIX  
 0.1664 Blood & T-cel Primary T helç BLOOD  
 0.1915 ENCODE2012 NH-A Astrocy BRAIN  
 0.0538 HSC & B-cell Primary hemæ BLOOD  
 0.0959 Brain Brain Cingulaç BRAIN  
 0.4214 iPSC iPS DF 6.9 Cel IPSC  
 0.3755 Epithelial Foreskin Kera SKIN  
 0.0826 Heart Right Atrium HEART  
 0.2086 Muscle Fetal Muscle MUSCLE\_LEG  
 0.3204 HSC & B-cell Primary B cell BLOOD  
 0.4214 HSC & B-cell Primary hemæ BLOOD  
 0.2215 Muscle Psoas Muscle MUSCLE  
 0.2844 ENCODE2012 Monocytes-C BLOOD  
 0.0344 HSC & B-cell Primary monç BLOOD  
 0.3101 HSC & B-cell Primary B cell BLOOD  
 0.4048 HSC & B-cell Primary neutç BLOOD  
 0.0708 Epithelial Foreskin Kera SKIN  
 0.4312 ESC HUES48 Cells ESC  
 0.4676 Sm. Muscle Colon Smoothf GI\_COLON  
 0.2611 Brain Fetal Brain M BRAIN  
 0.2274 ENCODE2012 NHDF-Ad Adu SKIN  
 0.1819 ENCODE2012 NHEK-Epiderr SKIN  
 0.2336 Digestive Fetal Stomacç GI\_STOMACH  
 0.3211 Brain Brain Angular BRAIN  
 0.0085 Blood & T-cel Primary T reg BLOOD

0.4709 Muscle Psoas Muscle MUSCLE  
 0.4682 Other Lung LUNG  
 0.2213 Other Fetal Lung LUNG  
 0.4241 ES-deriv hESC Derived ESC\_DERIVED  
 0.0761 ENCODE2012 Monocytes-C BLOOD  
 0.3331 Muscle Psoas Muscle MUSCLE  
 0.3241 Brain Brain Anterio BRAIN  
 0.1579 Brain Brain Inferior BRAIN  
 0.4617 Brain Brain Anterio BRAIN  
 0.2021 Mesench Mesenchyma STROMAL\_CONNECTIVE  
 0.4416 HSC & B-cell Primary Natu BLOOD  
 0.4703 Blood & T-cel Primary T hel BLOOD  
 0.4562 ENCODE2012 Dnd41 TCell L BLOOD  
 0.0722 Digestive Fetal Stomacl GI\_STOMACH  
 0.2992 Digestive Stomach Muc GI\_STOMACH  
 0.2056 ENCODE2012 HepG2 Hepat LIVER  
 0.4634 Brain Brain Hippocæ BRAIN  
 0.3374 Digestive Colonic Muco GI\_COLON  
 0.0628 Digestive Stomach Muc GI\_STOMACH  
 0.0548 Other Fetal Adrenal ADRENAL  
 0.4659 Blood & T-cel Primary T hel BLOOD  
 0.4738 Epithelial Breast Myoeç BREAST  
 0.1715 Digestive Duodenum V GI\_DUODENUM  
 0.4490 HSC & B-cell Primary neutç BLOOD  
 0.4722 Epithelial Breast Myoeç BREAST  
 0.4748 Heart Left Ventricle HEART  
 0.4722 Thymus Thymus THYMUS  
 0.0865 Thymus Thymus THYMUS  
 0.2191 ENCODE2012 Osteoblast Pr BONE  
 0.0628 Other Fetal Lung LUNG  
 0.3153 HSC & B-cell Primary hemæ BLOOD  
 0.1847 Blood & T-cel Primary monç BLOOD  
 0.4771 Thymus Fetal Thymus THYMUS  
 0.1286 Sm. Muscle Rectal Smoot GI\_RECTUM  
 0.4535 ENCODE2012 NHDF-Ad Adç SKIN  
 0.3326 Heart Right Ventricle HEART  
 0.0578 ES-deriv hESC Derived ESC\_DERIVED  
 0.4776 ES-deriv H1 BMP4 Der ESC\_DERIVED  
 0.3867 Digestive Esophagus GI\_ESOPHAGUS  
 0.4787 ES-deriv H1 Derived N ESC\_DERIVED  
 0.3966 Brain Brain Inferior BRAIN  
 0.4824 iPSC iPS-15b Cells IPSC  
 0.0607 Blood & T-cel Primary T CDç BLOOD

0.4246 Blood & T-cel Primary T cell BLOOD  
 0.1943 Digestive Fetal Intestine GI\_INTESTINE  
 0.3842 IMR90 IMR90 fetal lu LUNG  
 0.4813 Blood & T-cel Primary T hel BLOOD  
 0.2676 Digestive Small Intestine GI\_INTESTINE  
 0.2922 Epithelial Foreskin Fibro SKIN  
 0.1759 ES-deriv hESC Derived ESC\_DERIVED  
 0.3740 HSC & B-cell Primary mono BLOOD  
 0.2856 Other Fetal Lung LUNG  
 0.1732 Digestive Fetal Intestine GI\_INTESTINE  
 0.4871 Thymus Thymus THYMUS  
 0.1245 Sm. Muscle Stomach Smooth GI\_STOMACH  
 0.2899 HSC & B-cell Primary B cell BLOOD  
 0.0965 Other Ovary OVARY  
 0.0997 Other Fetal Kidney KIDNEY  
 0.2332 IMR90 IMR90 fetal lu LUNG  
 0.3106 ENCODE2012 NHEK-Epidermal SKIN  
 0.4871 Brain Brain Anterior BRAIN  
 0.4295 Heart Left Ventricle HEART  
 0.0705 ESC H1 Cells ESC  
 0.0821 iPSC iPSC-20b Cells IPSC  
 0.4849 HSC & B-cell Primary Natural BLOOD  
 0.2021 Sm. Muscle Duodenum Superior GI\_DUODENUM  
 0.0875 ENCODE2012 Monocytes-C BLOOD  
 0.0443 Mesenchymal Bone Marrow STROMAL\_CONNECTIVE  
 0.2215 Blood & T-cel Primary mono BLOOD  
 0.2056 iPSC iPSC DF 19.11 IPSC  
 0.4898 ESC ES-13 Cells ESC  
 0.4898 ES-deriv H1 Derived M ESC\_DERIVED  
 0.2846 Brain Brain\_Dorsolateral BRAIN  
 0.3886 HSC & B-cell Primary Natural BLOOD  
 0.4878 Brain Brain Anterior BRAIN  
 0.3748 Brain Brain Germinal BRAIN  
 0.1975 HSC & B-cell Primary neutrophil BLOOD  
 0.1689 ES-deriv H1 BMP4 Derived ESC\_DERIVED  
 0.4810 Digestive Colonic Mucosa GI\_COLON  
 0.1328 Digestive Fetal Stomach GI\_STOMACH  
 0.1579 Epithelial Foreskin Keratin SKIN  
 0.2336 Muscle Fetal Muscle MUSCLE\_LEG  
 0.4695 Thymus Fetal Thymus THYMUS  
 0.0505 Blood & T-cel Primary T hel BLOOD  
 0.2642 IMR90 IMR90 fetal lu LUNG  
 0.2401 ES-deriv H1 Derived N ESC\_DERIVED

|        |               |                          |
|--------|---------------|--------------------------|
| 0.4964 | iPSC          | iPS DF 19.11 (IPSC       |
| 0.2199 | Other         | Placenta Amr PLACENTA    |
| 0.2658 | Muscle        | Fetal Muscle MUSCLE      |
| 0.4939 | Other         | Fetal Lung LUNG          |
| 0.4956 | Epithelial    | Foreskin Mel:SKIN        |
| 0.1972 | Mesench       | Adipose Deriv FAT        |
| 0.2491 | Epithelial    | Foreskin Fibr:SKIN       |
| 0.2183 | Brain         | Brain Hippoc: BRAIN      |
| 0.3605 | Brain         | Brain Substar BRAIN      |
| 0.0483 | ESC           | ES-13 Cells ESC          |
| 0.4772 | Heart         | Aorta VASCULAR           |
| 0.2506 | Digestive     | Sigmoid Color GI_COLON   |
| 0.4953 | ES-deriv      | hESC Derived ESC_DERIVED |
| 0.5005 | HSC & B-cell  | Primary B cell BLOOD     |
| 0.4562 | Heart         | Right Atrium HEART       |
| 0.0394 | Muscle        | Skeletal Musc MUSCLE     |
| 0.3836 | Thymus        | Thymus THYMUS            |
| 0.4475 | Other         | Placenta PLACENTA        |
| 0.3261 | Neurosph      | Cortex derive BRAIN      |
| 0.0681 | HSC & B-cell  | Primary B cell BLOOD     |
| 0.3106 | Brain         | Brain Hippoc: BRAIN      |
| 0.0879 | Other         | Spleen SPLEEN            |
| 0.3107 | ESC           | HUES64 Cells ESC         |
| 0.0443 | Neurosph      | Cortex derive BRAIN      |
| 0.3235 | ENCODE2012    | NHDF-Ad Ad: SKIN         |
| 0.3940 | ENCODE2012    | NHDF-Ad Ad: SKIN         |
| 0.1926 | iPSC          | iPS DF 6.9 Cel IPSC      |
| 0.4953 | HSC & B-cell  | Primary B cell BLOOD     |
| 0.2183 | Digestive     | Gastric GI_STOMACH       |
| 0.1772 | Blood & T-cel | Primary T hel: BLOOD     |
| 0.4626 | ESC           | H9 Cells ESC             |
| 0.5047 | Blood & T-cel | Primary T hel: BLOOD     |
| 0.4301 | HSC & B-cell  | Primary neut: BLOOD      |
| 0.0705 | iPSC          | iPS-18 Cells IPSC        |
| 0.3778 | HSC & B-cell  | Primary hem: BLOOD       |
| 0.5094 | Brain         | Brain Angular BRAIN      |
| 0.2213 | Digestive     | Colonic Muco GI_COLON    |
| 0.5086 | Neurosph      | Ganglion Emi BRAIN       |
| 0.5093 | ENCODE2012    | NH-A Astrocy BRAIN       |
| 0.1769 | Brain         | Brain Germin BRAIN       |
| 0.0929 | ES-deriv      | H1 Derived M ESC_DERIVED |
| 0.4170 | Brain         | Brain Cingula: BRAIN     |
| 0.5108 | ESC           | HUES6 Cells ESC          |



|        |               |                |                    |
|--------|---------------|----------------|--------------------|
| 0.2615 | Other         | Spleen         | SPLEEN             |
| 0.5149 | Blood & T-cel | Primary T hel  | BLOOD              |
| 0.0486 | Muscle        | Fetal Muscle   | MUSCLE             |
| 0.4988 | Digestive     | Colonic Muco   | GI_COLON           |
| 0.3277 | Blood & T-cel | Primary mon    | BLOOD              |
| 0.5154 | Epithelial    | Foreskin Mel   | SKIN               |
| 0.5154 | Digestive     | Rectal Mucos   | GI_RECTUM          |
| 0.0425 | Other         | Fetal Lung     | LUNG               |
| 0.2815 | Muscle        | Psoas Muscle   | MUSCLE             |
| 0.3722 | Myosat        | Muscle Satell  | MUSCLE             |
| 0.5152 | ENCODE2012    | Osteoblast Pr  | BONE               |
| 0.3142 | ENCODE2012    | A549 EtOH 0.   | LUNG               |
| 0.3372 | ENCODE2012    | Osteoblast Pr  | BONE               |
| 0.4871 | Blood & T-cel | Primary T hel  | BLOOD              |
| 0.1212 | HSC & B-cell  | Primary neut   | BLOOD              |
| 0.4380 | Blood & T-cel | Primary T hel  | BLOOD              |
| 0.1624 | Epithelial    | Foreskin Fibr  | SKIN               |
| 0.4167 | Heart         | Right Ventricl | HEART              |
| 0.0922 | HSC & B-cell  | Primary mon    | BLOOD              |
| 0.1409 | Blood & T-cel | Primary T cell | BLOOD              |
| 0.5083 | ES-deriv      | hESC Derived   | ESC_DERIVED        |
| 0.2240 | Other         | Ovary          | OVARY              |
| 0.1888 | Other         | Fetal Kidney   | KIDNEY             |
| 0.3046 | Blood & T-cel | Primary T hel  | BLOOD              |
| 0.5185 | Mesench       | Bone Marrow    | STROMAL_CONNECTIVE |
| 0.4095 | Digestive     | Small Intestin | GI_INTESTINE       |
| 0.5216 | Muscle        | Fetal Muscle   | MUSCLE             |
| 0.2249 | Digestive     | Fetal Intestin | GI_INTESTINE       |
| 0.2528 | Muscle        | Skeletal Musc  | MUSCLE             |
| 0.2184 | Digestive     | Rectal Mucos   | GI_RECTUM          |
| 0.5011 | ESC           | ES-WA7 Cells   | ESC                |
| 0.0151 | iPSC          | iPS-15b Cells  | IPSC               |
| 0.4931 | Brain         | Brain_Dorsol   | BRAIN              |
| 0.1236 | Blood & T-cel | Primary T hel  | BLOOD              |
| 0.3308 | Other         | Fetal Adrenal  | ADRENAL            |
| 0.3807 | Thymus        | Fetal Thymus   | THYMUS             |
| 0.5198 | ESC           | ES-WA7 Cells   | ESC                |
| 0.0113 | Digestive     | Rectal Mucos   | GI_RECTUM          |
| 0.5108 | Other         | Placenta Amr   | PLACENTA           |
| 0.5094 | Mesench       | Adipose Deriv  | FAT                |
| 0.0233 | ESC           | HUES6 Cells    | ESC                |
| 0.5108 | Sm. Muscle    | Stomach Smo    | GI_STOMACH         |
| 0.4527 | HSC & B-cell  | Primary Natu   | BLOOD              |

0.4964 Brain Fetal Brain Fe BRAIN  
 0.3818 ESC H9 Cells ESC  
 0.4901 ESC HUES48 Cells ESC  
 0.0679 Blood & T-cel Primary T hel BLOOD  
 0.4251 Digestive Rectal Mucos GI\_RECTUM  
 0.4436 ESC ES-13 Cells ESC  
 0.4524 HSC & B-cell Primary B cell BLOOD  
 0.1459 HSC & B-cell Primary neutri BLOOD  
 0.5306 Other Liver LIVER  
 0.1612 Blood & T-cel Primary T hel BLOOD  
 0.5306 iPSC iPS-18 Cells IPSC  
 0.2056 Muscle Fetal Muscle MUSCLE\_LEG  
 0.1195 ENCODE2012 HepG2 Hepat LIVER  
 0.1064 Blood & T-cel Primary T reg BLOOD  
 0.0901 Other Fetal Adrenal ADRENAL  
 0.0708 ES-deriv H9 Derived N ESC\_DERIVED  
 0.5325 ESC ES-UCSF4 Cel ESC  
 0.1100 ESC HUES64 Cells ESC  
 0.5284 Mesench Adipose Deriv FAT  
 0.1083 Epithelial Breast Myoeç BREAST  
 0.3966 Brain Brain Anterio BRAIN  
 0.5203 Heart Right Atrium HEART  
 0.4748 Blood & T-cel Primary T CD8 BLOOD  
 0.0486 ESC ES-WA7 Cells ESC  
 0.0459 Other Fetal Kidney KIDNEY  
 0.2336 ESC ES-UCSF4 Cel ESC  
 0.0628 Digestive Rectal Mucos GI\_RECTUM  
 0.3676 ESC HUES6 Cells ESC  
 0.3306 Digestive Sigmoid Color GI\_COLON  
 0.5207 ENCODE2012 NH-A Astrocy BRAIN  
 0.1203 Blood & T-cel Primary T hel BLOOD  
 0.0628 ENCODE2012 Osteoblast Pr BONE  
 0.3244 Blood & T-cel Primary T reg BLOOD  
 0.4523 ENCODE2012 HepG2 Hepat LIVER  
 0.4659 Brain Fetal Brain Fe BRAIN  
 0.1684 Epithelial Foreskin Fibrc SKIN  
 0.0624 Neurosph Ganglion Emi BRAIN  
 0.0821 Muscle Skeletal Musc MUSCLE  
 0.3867 Blood & T-cel Primary T hel BLOOD  
 0.5292 Other Lung LUNG  
 0.0865 Blood & T-cel Primary T cell BLOOD  
 0.3376 Blood & T-cel Primary T hel BLOOD  
 0.4871 Brain Brain Anterio BRAIN

0.2834 Blood & T-cel Primary T hel BLOOD  
 0.0749 Epithelial Breast varian BREAST  
 0.4948 Blood & T-cel Primary T cell BLOOD  
 0.1183 Other Spleen SPLEEN  
 0.0484 Mesench Mesenchyma FAT  
 0.3776 ENCODE2012 NHEK-Epiderr SKIN  
 0.0865 Muscle Skeletal Musc MUSCLE  
 0.5408 ENCODE2012 HUVEC Umbil VASCULAR  
 0.1579 Sm. Muscle Duodenum Sr GI\_DUODENUM  
 0.3547 Sm. Muscle Stomach Smo GI\_STOMACH  
 0.3850 HSC & B-cell Primary B cell BLOOD  
 0.2779 ESC H1 Cells ESC  
 0.4663 Brain Brain Cingula BRAIN  
 0.4904 Other Placenta PLACENTA  
 0.2697 ES-deriv hESC Derived ESC\_DERIVED  
 0.4247 Epithelial Foreskin Mel SKIN  
 0.0681 ESC H1 Cells ESC  
 0.3441 ES-deriv hESC Derived ESC\_DERIVED  
 0.3033 Other Pancreatic Isl PANCREAS  
 0.4427 Mesench Mesenchyma FAT  
 0.2415 Blood & T-cel Primary T hel BLOOD  
 0.3033 iPSC iPS DF 19.11 (IPSC  
 0.3620 Epithelial Foreskin Kera SKIN  
 0.5283 HSC & B-cell Primary neut BLOOD  
 0.5219 Other Ovary OVARY  
 0.0942 ENCODE2012 HMEC Mamr BREAST  
 0.5267 ESC H9 Cells ESC  
 0.2513 ESC ES-13 Cells ESC  
 0.2558 Epithelial Foreskin Kera SKIN  
 0.5461 Blood & T-cel Primary T hel BLOOD  
 0.4062 Myosat Muscle Satell MUSCLE  
 0.5284 Epithelial Foreskin Kera SKIN  
 0.1083 Blood & T-cel Primary T hel BLOOD  
 0.0783 iPSC iPS-18 Cells IPSC  
 0.5325 ENCODE2012 Monocytes-C BLOOD  
 0.5473 Sm. Muscle Duodenum Sr GI\_DUODENUM  
 0.5460 ES-deriv H9 Derived N ESC\_DERIVED  
 0.0542 Mesench Adipose Deriv FAT  
 0.5461 Muscle Fetal Muscle MUSCLE\_LEG  
 0.0997 ENCODE2012 NHEK-Epiderr SKIN  
 0.1314 Other Placenta PLACENTA  
 0.0691 Brain Brain Substar BRAIN  
 0.1806 HSC & B-cell Primary hem BLOOD

0.1772 ENCODE2012 NHLF Lung Fil LUNG  
 0.2056 HSC & B-cell Primary hem; BLOOD  
 0.2073 ENCODE2012 Monocytes-C BLOOD  
 0.5306 Muscle Fetal Muscle MUSCLE  
 0.0567 ESC H9 Cells ESC  
 0.1099 Myosat Muscle Satell MUSCLE  
 0.1310 Blood & T-cel Primary T CD; BLOOD  
 0.3650 ES-deriv hESC Derived ESC\_DERIVED  
 0.1046 IMR90 IMR90 fetal l; LUNG  
 0.4117 IMR90 IMR90 fetal l; LUNG  
 0.4180 ESC HUES6 Cells ESC  
 0.4351 HSC & B-cell Primary hem; BLOOD  
 0.5220 Heart Right Ventricl HEART  
 0.0783 ENCODE2012 HeLa-S3 Cervi CERVIX  
 0.1542 Adipose Adipose Nucl; FAT  
 0.0770 ES-deriv hESC Derived ESC\_DERIVED  
 0.5326 Muscle Psoas Muscle MUSCLE  
 0.2534 Blood & T-cel Primary T hel; BLOOD  
 0.0698 ENCODE2012 A549 EtOH 0. LUNG  
 0.1057 ES-deriv H9 Derived N ESC\_DERIVED  
 0.0636 ESC ES-13 Cells ESC  
 0.1183 Blood & T-cel Primary T cell BLOOD  
 0.1288 Brain Brain Germin BRAIN  
 0.5437 ENCODE2012 HepG2 Hepat LIVER  
 0.5408 iPSC iPS-20b Cells IPSC  
 0.5562 ENCODE2012 HeLa-S3 Cervi CERVIX  
 0.4936 Mesench Mesenchyma FAT  
 0.0737 Brain Brain Angular BRAIN  
 0.4699 ENCODE2012 HSMM Skelet MUSCLE  
 0.3163 Muscle Skeletal Musc MUSCLE  
 0.1108 ES-deriv H1 BMP4 Der ESC\_DERIVED  
 0.4278 Other Liver LIVER  
 0.0866 ENCODE2012 NHLF Lung Fil LUNG  
 0.4109 Epithelial Foreskin Fibr; SKIN  
 0.2160 ESC HUES6 Cells ESC  
 0.3642 Epithelial Foreskin Fibr; SKIN  
 0.5458 Other Fetal Lung LUNG  
 0.4901 Blood & T-cel Primary T cell BLOOD  
 0.0987 iPSC iPS DF 6.9 Cel IPSC  
 0.2830 Blood & T-cel Primary T hel; BLOOD  
 0.2166 Other Liver LIVER  
 0.0843 Heart Aorta VASCULAR  
 0.1914 ENCODE2012 Osteoblast Pr BONE

|        |               |                |                    |
|--------|---------------|----------------|--------------------|
| 0.0973 | ESC           | HUES48 Cells   | ESC                |
| 0.4002 | Adipose       | Adipose Nucl   | FAT                |
| 0.1716 | Muscle        | Fetal Muscle   | MUSCLE_LEG         |
| 0.5104 | Heart         | Left Ventricle | HEART              |
| 0.4732 | IMR90         | IMR90 fetal lu | LUNG               |
| 0.5012 | Brain         | Brain Inferior | BRAIN              |
| 0.1724 | ES-deriv      | H1 Derived M   | ESC_DERIVED        |
| 0.5293 | ES-deriv      | H1 Derived M   | ESC_DERIVED        |
| 0.0973 | Epithelial    | Breast Myoe    | BREAST             |
| 0.5588 | Mesench       | Bone Marrow    | STROMAL_CONNECTIVE |
| 0.2700 | Epithelial    | Foreskin Mel   | SKIN               |
| 0.2970 | Muscle        | Fetal Muscle   | MUSCLE             |
| 0.5562 | ESC           | HUES48 Cells   | ESC                |
| 0.3987 | Other         | Pancreatic Isl | PANCREAS           |
| 0.4871 | Blood & T-cel | Primary T CD   | BLOOD              |
| 0.2372 | HSC & B-cell  | Primary mon    | BLOOD              |
| 0.5641 | Mesench       | Mesenchyma     | FAT                |
| 0.5154 | Other         | Placenta       | PLACENTA           |
| 0.3966 | Other         | Spleen         | SPLEEN             |
| 0.2025 | ENCODE2012    | HepG2 Hepat    | LIVER              |
| 0.4516 | ESC           | HUES64 Cells   | ESC                |
| 0.5634 | Blood & T-cel | Primary T cell | BLOOD              |
| 0.4036 | Blood & T-cel | Primary T cell | BLOOD              |
| 0.5647 | Heart         | Fetal Heart    | HEART              |
| 0.5577 | HSC & B-cell  | Primary B cell | BLOOD              |
| 0.0729 | Other         | Pancreatic Isl | PANCREAS           |
| 0.5546 | Blood & T-cel | Primary T CD   | BLOOD              |
| 0.1664 | ES-deriv      | hESC Derived   | ESC_DERIVED        |
| 0.5564 | Blood & T-cel | Primary T cell | BLOOD              |
| 0.5612 | Digestive     | Stomach Muc    | GI_STOMACH         |
| 0.5352 | ES-deriv      | H1 Derived N   | ESC_DERIVED        |
| 0.1700 | Digestive     | Gastric        | GI_STOMACH         |
| 0.1329 | ESC           | HUES64 Cells   | ESC                |
| 0.4074 | HSC & B-cell  | Primary hem    | BLOOD              |
| 0.1621 | ENCODE2012    | K562 Leukem    | BLOOD              |
| 0.5709 | Digestive     | Fetal Intestin | GI_INTESTINE       |
| 0.3175 | HSC & B-cell  | Primary neut   | BLOOD              |
| 0.4931 | Epithelial    | Foreskin Mel   | SKIN               |
| 0.5647 | ES-deriv      | H1 Derived M   | ESC_DERIVED        |
| 0.2025 | Other         | Placenta Amr   | PLACENTA           |
| 0.2167 | Digestive     | Stomach Muc    | GI_STOMACH         |
| 0.5669 | Blood & T-cel | Primary T reg  | BLOOD              |
| 0.1745 | ES-deriv      | H1 Derived N   | ESC_DERIVED        |

0.5321 ENCODE2012 HMEC Mamr BREAST  
 0.2586 Heart Fetal Heart HEART  
 0.3393 Digestive Fetal Intestine GI\_INTESTINE  
 0.1964 Mesench Mesenchyma STROMAL\_CONNECTIVE  
 0.5450 Epithelial Foreskin Kera SKIN  
 0.3612 ESC HUES6 Cells ESC  
 0.4344 ESC ES-WA7 Cells ESC  
 0.1515 Muscle Psoas Muscle MUSCLE  
 0.1463 ENCODE2012 GM12878 Lyr BLOOD  
 0.5737 ES-deriv H9 Derived N ESC\_DERIVED  
 0.5746 Sm. Muscle Duodenum Sr GI\_DUODENUM  
 0.3046 Other Placenta PLACENTA  
 0.3686 Brain Brain Cingula BRAIN  
 0.1699 Brain Fetal Brain Fe BRAIN  
 0.2809 iPSC iPS-20b Cells IPSC  
 0.2445 Blood & T-cel Primary T CD8 BLOOD  
 0.4095 Blood & T-cel Primary T CD4 BLOOD  
 0.5461 ES-deriv hESC Derived ESC\_DERIVED  
 0.1965 ENCODE2012 HeLa-S3 Cervi CERVIX  
 0.5595 Brain Fetal Brain M BRAIN  
 0.1716 ENCODE2012 NHDF-Ad Adu SKIN  
 0.1767 Sm. Muscle Stomach Smo GI\_STOMACH  
 0.5220 Blood & T-cel Primary T reg BLOOD  
 0.1642 Other Ovary OVARY  
 0.1792 ENCODE2012 HSMM Skelet MUSCLE  
 0.3842 Blood & T-cel Primary monc BLOOD  
 0.1953 Blood & T-cel Primary T cell BLOOD  
 0.2056 Epithelial Foreskin Fibrc SKIN  
 0.5255 ES-deriv H9 Derived N ESC\_DERIVED  
 0.5089 Brain Brain\_Dorsolc BRAIN  
 0.5511 Other Placenta PLACENTA  
 0.2709 ES-deriv H1 BMP4 Der ESC\_DERIVED  
 0.3565 ENCODE2012 Dnd41 TCell L BLOOD  
 0.5617 Heart Right Atrium HEART  
 0.2127 Epithelial Foreskin Fibrc SKIN  
 0.1776 Brain Brain\_Dorsolc BRAIN  
 0.2405 ENCODE2012 NH-A Astrocy BRAIN  
 0.5332 iPSC iPS-18 Cells IPSC  
 0.5866 Blood & T-cel Primary T CD8 BLOOD  
 0.3731 Blood & T-cel Primary T hel BLOOD  
 0.5720 Mesench Adipose Deriv FAT  
 0.2779 Other Liver LIVER  
 0.2726 Digestive Small Intestine GI\_INTESTINE

|        |                 |                   |                    |
|--------|-----------------|-------------------|--------------------|
| 0.4535 | ESC             | H9 Cells          | ESC                |
| 0.2705 | Epithelial      | Foreskin Kera     | SKIN               |
| 0.1985 | Heart           | Right Ventricle   | HEART              |
| 0.2079 | Brain           | Brain Hippocampus | BRAIN              |
| 0.5647 | Sm. Muscle      | Colon Smooth      | GI_COLON           |
| 0.5756 | iPSC            | iPS-18 Cells      | IPSC               |
| 0.1815 | Brain           | Brain Anterior    | BRAIN              |
| 0.5647 | Mesench         | Mesenchyma        | FAT                |
| 0.3748 | iPSC            | iPS-18 Cells      | IPSC               |
| 0.3460 | Blood & T-cell  | Primary T helper  | BLOOD              |
| 0.1967 | Sm. Muscle      | Rectal Smooth     | GI_RECTUM          |
| 0.2240 | Digestive       | Duodenum IV       | GI_DUODENUM        |
| 0.5714 | Blood & T-cell  | Primary T CD4     | BLOOD              |
| 0.5425 | Muscle          | Skeletal Muscle   | MUSCLE             |
| 0.2146 | Sm. Muscle      | Duodenum Sr       | GI_DUODENUM        |
| 0.5737 | Blood & T-cell  | Primary T cell    | BLOOD              |
| 0.5475 | ENCODE2012 NH-A | Astrocyte         | BRAIN              |
| 0.5904 | Blood & T-cell  | Primary T CD4     | BLOOD              |
| 0.5577 | Digestive       | Rectal Mucosa     | GI_RECTUM          |
| 0.5894 | HSC & B-cell    | Primary B cell    | BLOOD              |
| 0.5227 | Brain           | Brain Hippocampus | BRAIN              |
| 0.3627 | iPSC            | iPS-15b Cells     | IPSC               |
| 0.3116 | Digestive       | Fetal Stomach     | GI_STOMACH         |
| 0.4948 | Heart           | Left Ventricle    | HEART              |
| 0.5866 | Muscle          | Fetal Muscle      | MUSCLE_LEG         |
| 0.5922 | Muscle          | Skeletal Muscle   | MUSCLE             |
| 0.5503 | Other           | Fetal Adrenal     | ADRENAL            |
| 0.5904 | ENCODE2012 K562 | Leukemia          | BLOOD              |
| 0.4664 | ENCODE2012 NH-A | Astrocyte         | BRAIN              |
| 0.5154 | Digestive       | Colonic Mucosa    | GI_COLON           |
| 0.5684 | ENCODE2012 HSMM | cell derived      | MUSCLE             |
| 0.5935 | ES-deriv        | H1 Derived M      | ESC_DERIVED        |
| 0.5836 | Digestive       | Fetal Intestine   | GI_INTESTINE       |
| 0.5024 | Blood & T-cell  | Primary T reg     | BLOOD              |
| 0.5737 | Muscle          | Fetal Muscle      | MUSCLE             |
| 0.4606 | Digestive       | Duodenum IV       | GI_DUODENUM        |
| 0.2539 | Brain           | Brain Cingulate   | BRAIN              |
| 0.5562 | Digestive       | Esophagus         | GI_ESOPHAGUS       |
| 0.5845 | Mesench         | Bone Marrow       | STROMAL_CONNECTIVE |
| 0.4265 | ESC             | HUES48 Cells      | ESC                |
| 0.0643 | Brain           | Fetal Brain M     | BRAIN              |
| 0.5216 | iPSC            | iPS-20b Cells     | IPSC               |
| 0.5916 | Digestive       | Fetal Stomach     | GI_STOMACH         |

0.5891 Epithelial Breast Myoep BREAST  
 0.2705 ENCODE2012 HSMM cell de MUSCLE  
 0.4001 Brain Fetal Brain M BRAIN  
 0.5562 Thymus Thymus THYMUS  
 0.3255 Digestive Fetal Stomach GI\_STOMACH  
 0.5879 ENCODE2012 HSMM Skelet MUSCLE  
 0.4794 ENCODE2012 Dnd41 TCell L BLOOD  
 0.4231 Blood & T-cell Primary T hel BLOOD  
 0.5894 Sm. Muscle Colon Smooth GI\_COLON  
 0.5459 HSC & B-cell Primary hem BLOOD  
 0.5990 Other Lung LUNG  
 0.3331 Other Lung LUNG  
 0.3828 ENCODE2012 HUVEC Umbil VASCULAR  
 0.5981 ESC ES-13 Cells ESC  
 0.2899 Sm. Muscle Colon Smooth GI\_COLON  
 0.4252 Blood & T-cell Primary T hel BLOOD  
 0.2534 HSC & B-cell Primary hem BLOOD  
 0.3306 Digestive Fetal Intestine GI\_INTESTINE  
 0.5906 Epithelial Foreskin Mel SKIN  
 0.5861 ENCODE2012 HSMM cell de MUSCLE  
 0.5980 Sm. Muscle Stomach Smooth GI\_STOMACH  
 0.5145 ES-deriv H1 BMP4 Der ESC\_DERIVED  
 0.5284 Digestive Fetal Intestine GI\_INTESTINE  
 0.5994 ES-deriv hESC Derived ESC\_DERIVED  
 0.5887 Epithelial Foreskin Kera SKIN  
 0.4871 ENCODE2012 Monocytes-C BLOOD  
 0.6055 Digestive Small Intestine GI\_INTESTINE  
 0.5958 Epithelial Breast Myoep BREAST  
 0.4046 Blood & T-cell Primary T hel BLOOD  
 0.4938 iPSC iPS-15b Cells IPSC  
 0.3333 ENCODE2012 K562 Leukem BLOOD  
 0.5922 Blood & T-cell Primary T hel BLOOD  
 0.6033 Digestive Small Intestine GI\_INTESTINE  
 0.4513 Digestive Colonic Mucosa GI\_COLON  
 0.5605 ENCODE2012 HSMM cell de MUSCLE  
 0.5884 Mesench Bone Marrow STROMAL\_CONNECTIVE  
 0.5461 Epithelial Foreskin Kera SKIN  
 0.6075 Digestive Esophagus GI\_ESOPHAGUS  
 0.4316 HSC & B-cell Primary Natu BLOOD  
 0.6033 Epithelial Foreskin Fibro SKIN  
 0.3711 ESC ES-UCSF4 Cell ESC  
 0.3465 HSC & B-cell Primary hem BLOOD  
 0.5385 Digestive Esophagus GI\_ESOPHAGUS



|        |               |                |                    |
|--------|---------------|----------------|--------------------|
| 0.3506 | Mesench       | Bone Marrow    | STROMAL_CONNECTIVE |
| 0.5923 | Other         | Fetal Lung     | LUNG               |
| 0.4721 | HSC & B-cell  | Primary B cell | BLOOD              |
| 0.3455 | iPSC          | iPS-20b Cells  | IPSC               |
| 0.5242 | Epithelial    | Foreskin Fibrc | SKIN               |
| 0.4925 | ENCODE2012    | HUVEC Umbil    | VASCULAR           |
| 0.4625 | ENCODE2012    | Monocytes-C    | BLOOD              |
| 0.6071 | Digestive     | Colonic Muco   | GI_COLON           |
| 0.4305 | Muscle        | Skeletal Musc  | MUSCLE             |
| 0.3615 | Mesench       | Adipose Deriv  | FAT                |
| 0.5977 | Blood & T-cel | Primary T hel  | BLOOD              |
| 0.4693 | ENCODE2012    | HSMM Skelet    | MUSCLE             |
| 0.5406 | Brain         | Fetal Brain Fe | BRAIN              |
| 0.5630 | Neurosph      | Cortex derive  | BRAIN              |
| 0.4898 | ENCODE2012    | NHDF-Ad Adu    | SKIN               |
| 0.6107 | Blood & T-cel | Primary T hel  | BLOOD              |
| 0.6044 | Brain         | Brain Inferior | BRAIN              |
| 0.6014 | Sm. Muscle    | Duodenum Sr    | GI_DUODENUM        |
| 0.5873 | Heart         | Fetal Heart    | HEART              |
| 0.5606 | Digestive     | Small Intestin | GI_INTESTINE       |
| 0.3241 | Heart         | Right Atrium   | HEART              |
| 0.5220 | Brain         | Brain Anterio  | BRAIN              |
| 0.6064 | iPSC          | iPS DF 6.9 Cel | IPSC               |
| 0.4306 | Digestive     | Sigmoid Color  | GI_COLON           |
| 0.5641 | ES-deriv      | hESC Derived   | ESC_DERIVED        |
| 0.5941 | ENCODE2012    | HMEC Mamr      | BREAST             |
| 0.6014 | Mesench       | Mesenchyma     | STROMAL_CONNECTIVE |
| 0.5945 | Mesench       | Bone Marrow    | STROMAL_CONNECTIVE |
| 0.5106 | HSC & B-cell  | Primary hemz   | BLOOD              |
| 0.4956 | ENCODE2012    | HSMM cell de   | MUSCLE             |
| 0.5906 | Myosat        | Muscle Satell  | MUSCLE             |
| 0.6059 | ESC           | ES-UCSF4 Cel   | ESC                |
| 0.5794 | Epithelial    | Foreskin Kera  | SKIN               |
| 0.4523 | Digestive     | Rectal Mucos   | GI_RECTUM          |
| 0.5128 | Brain         | Fetal Brain M  | BRAIN              |
| 0.5811 | Thymus        | Fetal Thymus   | THYMUS             |
| 0.5516 | Brain         | Brain Germin   | BRAIN              |
| 0.5169 | Epithelial    | Foreskin Fibrc | SKIN               |
| 0.4469 | Digestive     | Esophagus      | GI_ESOPHAGUS       |
| 0.5108 | Brain         | Fetal Brain Fe | BRAIN              |
| 0.6213 | Other         | Fetal Lung     | LUNG               |
| 0.5941 | ES-deriv      | hESC Derived   | ESC_DERIVED        |
| 0.6203 | ESC           | H1 Cells       | ESC                |

0.4345 Heart Left Ventricle HEART  
 0.6204 Brain Brain Substar BRAIN  
 0.6147 Blood & T-cel Primary T hel BLOOD  
 0.5588 ES-deriv H1 Derived M ESC\_DERIVED  
 0.6232 Other Fetal Lung LUNG  
 0.6239 iPSC iPS DF 6.9 Cell IPSC  
 0.5220 Myosat Muscle Satell MUSCLE  
 0.6245 Adipose Adipose Nucl FAT  
 0.5562 Heart Right Atrium HEART  
 0.4845 iPSC iPS DF 19.11 (IPSC  
 0.5423 Brain Fetal Brain M BRAIN  
 0.5503 ES-deriv H9 Derived N ESC\_DERIVED  
 0.6149 iPSC iPS-20b Cells IPSC  
 0.4241 ES-deriv hESC Derived ESC\_DERIVED  
 0.6113 ENCODE2012 Dnd41 TCell L BLOOD  
 0.6255 Epithelial Breast varian BREAST  
 0.4737 HSC & B-cell Primary hem BLOOD  
 0.6179 Neurosph Ganglion Emi BRAIN  
 0.4871 Other Liver LIVER  
 0.6122 Epithelial Breast varian BREAST  
 0.6071 HSC & B-cell Primary B cell BLOOD  
 0.5401 Thymus Fetal Thymus THYMUS  
 0.6199 ENCODE2012 HeLa-S3 Cervi CERVIX  
 0.5714 HSC & B-cell Primary hem BLOOD  
 0.5873 ESC HUES64 Cells ESC  
 0.5941 Blood & T-cel Primary T hel BLOOD  
 0.6264 Blood & T-cel Primary T hel BLOOD  
 0.5844 ESC ES-13 Cells ESC  
 0.6258 Digestive Fetal Stomach GI\_STOMACH  
 0.2890 ENCODE2012 HeLa-S3 Cervi CERVIX  
 0.5651 ESC HUES48 Cells ESC  
 0.4816 Brain Brain Inferior BRAIN  
 0.5347 ES-deriv H9 Derived N ESC\_DERIVED  
 0.6149 Mesench Bone Marrow STROMAL\_CONNECTIVE  
 0.5880 Other Ovary OVARY  
 0.6351 ENCODE2012 HepG2 Hepat LIVER  
 0.5861 HSC & B-cell Primary B cell BLOOD  
 0.6199 Muscle Psoas Muscle MUSCLE  
 0.6386 Epithelial Breast Myoe BREAST  
 0.6176 ENCODE2012 Osteoblast Pr BONE  
 0.5113 Adipose Adipose Nucl FAT  
 0.6046 HSC & B-cell Primary hem BLOOD  
 0.6135 ES-deriv H1 Derived N ESC\_DERIVED

0.5894 HSC & B-cell Primary Natu BLOOD  
 0.5396 Epithelial Foreskin Fibr SKIN  
 0.6232 Brain Fetal Brain Fe BRAIN  
 0.6392 ENCODE2012 Monocytes-C BLOOD  
 0.6199 ENCODE2012 NHEK-Epiderr SKIN  
 0.6444 Brain Brain Germin BRAIN  
 0.6422 ES-deriv H9 Derived N ESC\_DERIVED  
 0.6387 iPSC iPS-15b Cells IPSC  
 0.6392 ESC HUES64 Cells ESC  
 0.6078 Digestive Rectal Mucos GI\_RECTUM  
 0.6337 Other Spleen SPLEEN  
 0.6454 ES-deriv hESC Derived ESC\_DERIVED  
 0.6422 Muscle Skeletal Musc MUSCLE  
 0.6387 Heart Fetal Heart HEART  
 0.5851 Blood & T-cel Primary T hel BLOOD  
 0.6483 Epithelial Foreskin Mel SKIN  
 0.5651 Muscle Skeletal Musc MUSCLE  
 0.6335 ENCODE2012 Dnd41 TCell L BLOOD  
 0.4104 Other Fetal Adrenal ADRENAL  
 0.5757 Digestive Stomach Muc GI\_STOMACH  
 0.6206 Thymus Thymus THYMUS  
 0.6508 Brain Fetal Brain M BRAIN  
 0.6224 Brain Brain\_Dorsol BRAIN  
 0.6400 Digestive Sigmoid Color GI\_COLON  
 0.5307 Brain Fetal Brain Fe BRAIN  
 0.6299 Brain Brain Angular BRAIN  
 0.6347 HSC & B-cell Primary B cell BLOOD  
 0.5319 ES-deriv H1 Derived N ESC\_DERIVED  
 0.6563 Neurosph Cortex derive BRAIN  
 0.6573 Mesench Adipose Deriv FAT  
 0.6335 Epithelial Foreskin Mel SKIN  
 0.6148 Digestive Rectal Mucos GI\_RECTUM  
 0.6149 Blood & T-cel Primary T CD BLOOD  
 0.6592 Muscle Skeletal Musc MUSCLE  
 0.6609 Epithelial Breast Myoe BREAST  
 0.6580 ES-deriv H1 Derived N ESC\_DERIVED  
 0.6377 Brain Brain Inferior BRAIN  
 0.6508 Digestive Fetal Intestin GI\_INTESTINE  
 0.6199 Blood & T-cel Primary T hel BLOOD  
 0.6580 Muscle Fetal Muscle MUSCLE\_LEG  
 0.6587 Epithelial Breast varian BREAST  
 0.6543 Blood & T-cel Primary T hel BLOOD  
 0.6547 Blood & T-cel Primary T CD BLOOD

0.6391 Thymus Thymus THYMUS  
 0.6528 Other Fetal Adrenal ADRENAL  
 0.6537 Muscle Skeletal Musc MUSCLE  
 0.6580 Other Pancreas PANCREAS  
 0.6613 Digestive Stomach Muc GI\_STOMACH  
 0.6624 IMR90 IMR90 fetal l LUNG  
 0.5759 ENCODE2012 A549 EtOH 0. LUNG  
 0.6292 Blood & T-cel Primary T hel BLOOD  
 0.6076 Blood & T-cel Primary T hel BLOOD  
 0.6499 Blood & T-cel Primary monc BLOOD  
 0.6695 Digestive Rectal Mucos GI\_RECTUM  
 0.6695 Epithelial Foreskin Kera SKIN  
 0.6488 Epithelial Foreskin Kera SKIN  
 0.6670 ESC HUES64 Cells ESC  
 0.6454 Other Placenta Amr PLACENTA  
 0.6580 Blood & T-cel Primary T hel BLOOD  
 0.6580 iPSC iPS-15b Cells IPSC  
 0.6688 Other Pancreatic Isl PANCREAS  
 0.6478 Blood & T-cel Primary T hel BLOOD  
 0.6645 HSC & B-cell Primary monc BLOOD  
 0.6301 HSC & B-cell Primary hemc BLOOD  
 0.6735 Thymus Fetal Thymus THYMUS  
 0.6784 Heart Right Ventricle HEART  
 0.6654 ENCODE2012 A549 EtOH 0. LUNG  
 0.6117 Other Placenta PLACENTA  
 0.6779 Digestive Colonic Muco GI\_COLON  
 0.6797 Blood & T-cel Primary T hel BLOOD  
 0.6844 Brain Brain Anterio BRAIN  
 0.6508 Digestive Stomach Muc GI\_STOMACH  
 0.6820 Epithelial Foreskin Melc SKIN  
 0.6784 Brain Brain Anterio BRAIN  
 0.6419 Blood & T-cel Primary T reg BLOOD  
 0.6847 Digestive Fetal Intestin GI\_INTESTINE  
 0.6784 Muscle Fetal Muscle MUSCLE  
 0.6844 Sm. Muscle Duodenum Sr GI\_DUODENUM  
 0.6898 Sm. Muscle Stomach Smo GI\_STOMACH  
 0.6863 Blood & T-cel Primary T hel BLOOD  
 0.6901 Epithelial Foreskin Kera SKIN  
 0.6892 Muscle Fetal Muscle MUSCLE  
 0.6912 Muscle Fetal Muscle MUSCLE\_LEG  
 0.6913 Epithelial Foreskin Fibrc SKIN  
 0.6912 Heart Right Atrium HEART  
 0.6920 Other Fetal Kidney KIDNEY

0.6801 ENCODE2012 Dnd41 TCell L BLOOD  
 0.6844 Blood & T-cel Primary monr BLOOD  
 0.6147 Thymus Fetal Thymus THYMUS  
 0.6979 ES-deriv H1 Derived M ESC\_DERIVED  
 0.7024 Epithelial Foreskin Mel SKIN  
 0.6506 Other Pancreatic Isl PANCREAS  
 0.7045 Blood & T-cel Primary T cell BLOOD  
 0.6876 Digestive Rectal Mucos GI\_RECTUM  
 0.7056 ENCODE2012 HMEC Mamr BREAST  
 0.6379 Muscle Psoas Muscle MUSCLE  
 0.6944 Other Fetal Kidney KIDNEY  
 0.6744 Brain Brain Angular BRAIN  
 0.7506 Epithelial Foreskin Fibr SKIN  
 0.6335 Digestive Fetal Intestin GI\_INTESTINE  
 0.7366 Myosat Muscle Satell MUSCLE  
 0.6961 Blood & T-cel Primary T hel BLOOD  
 0.7666 Brain Brain Inferior BRAIN  
 0.7670 Blood & T-cel Primary T CD8 BLOOD  
 0.6454 Adipose Adipose Nucl FAT  
 0.7708 ENCODE2012 Dnd41 TCell L BLOOD  
 0.7238 Neurosph Cortex derive BRAIN  
 0.7373 ENCODE2012 HepG2 Hepat LIVER  
 0.7289 Brain Brain Cingula BRAIN  
 0.7273 iPSC iPS-15b Cells IPSC  
 0.7373 Other Lung LUNG  
 0.7581 Mesench Mesenchyma STROMAL\_CONNECTIVE  
 0.7238 Blood & T-cel Primary T hel BLOOD  
 0.7940 Brain Brain Cingula BRAIN  
 0.7212 Digestive Gastric GI\_STOMACH  
 0.7366 IMR90 IMR90 fetal l LUNG  
 0.7461 Brain Brain Anterio BRAIN  
 0.8005 Other Ovary OVARY  
 0.7398 ENCODE2012 NHEK-Epiderr SKIN  
 0.7421 ESC HUES6 Cells ESC  
 0.7373 Blood & T-cel Primary T hel BLOOD  
 0.7445 Digestive Fetal Intestin GI\_INTESTINE  
 0.6861 HSC & B-cell Primary neutr BLOOD  
 0.7053 Muscle Fetal Muscle MUSCLE\_LEG  
 0.6892 Brain Brain Substar BRAIN  
 0.6071 ES-deriv H1 BMP4 Der ESC\_DERIVED  
 0.7073 ESC H1 Cells ESC  
 0.7506 HSC & B-cell Primary B cell BLOOD  
 0.7358 ESC HUES48 Cells ESC

0.8167 Brain Brain Germin BRAIN  
 0.8286 Blood & T-cel Primary T hel BLOOD  
 0.7691 Digestive Duodenum M GI\_DUODENUM  
 0.7212 Other Placenta Amr PLACENTA  
 0.6987 HSC & B-cell Primary B cell BLOOD  
 0.7392 Digestive Sigmoid Color GI\_COLON  
 0.7888 Sm. Muscle Stomach Smo GI\_STOMACH  
 0.7135 ENCODE2012 Osteoblast Pr BONE  
 0.7448 ENCODE2012 GM12878 Lyr BLOOD  
 0.7710 Neurosph Cortex derive BRAIN  
 0.6787 Brain Brain Substar BRAIN  
 0.6956 Brain Brain Hippocæ BRAIN  
 0.7264 ES-deriv H1 Derived M ESC\_DERIVED  
 0.7784 HSC & B-cell Primary Natu BLOOD  
 0.8277 Digestive Small Intestin GI\_INTESTINE  
 0.7709 Other Placenta PLACENTA  
 0.6467 Epithelial Foreskin Fibr SKIN  
 0.7108 ENCODE2012 K562 Leukem BLOOD  
 0.8312 Blood & T-cel Primary T cell BLOOD  
 0.8044 HSC & B-cell Primary B cell BLOOD  
 0.8932 Brain Brain Substar BRAIN  
 0.5916 Brain Brain Hippocæ BRAIN  
 0.7147 ENCODE2012 A549 EtOH O. LUNG  
 0.7976 Neurosph Ganglion Emi BRAIN  
 0.8859 Muscle Fetal Muscle MUSCLE  
 0.9041 ENCODE2012 NH-A Astrocy BRAIN  
 0.8904 Brain Brain Angular BRAIN  
 0.7266 ESC ES-WA7 Cells ESC  
 0.7847 Epithelial Foreskin Mel SKIN  
 0.6847 Brain Brain Anterio BRAIN  
 0.6841 Digestive Sigmoid Color GI\_COLON  
 0.7603 HSC & B-cell Primary hemæ BLOOD  
 0.7976 Blood & T-cel Primary T cell BLOOD  
 0.9065 HSC & B-cell Primary neut BLOOD  
 0.7138 Blood & T-cel Primary T hel BLOOD  
 0.7265 Digestive Esophagus GI\_ESOPHAGUS  
 0.9436 Muscle Fetal Muscle MUSCLE\_LEG  
 0.7889 Other Fetal Adrenal ADRENAL  
 0.7741 ES-deriv hESC Derived ESC\_DERIVED  
 0.7448 Digestive Colonic Muco GI\_COLON  
 0.7979 Sm. Muscle Rectal Smoot GI\_RECTUM  
 0.9270 ENCODE2012 K562 Leukem BLOOD  
 0.7211 ENCODE2012 HMEC Mamr BREAST

0.8419 ENCODE2012 Dnd41 TCell L BLOOD  
 0.9548 Neurosph Cortex derive BRAIN  
 0.7200 ENCODE2012 HSMM Skelet MUSCLE  
 0.9463 Blood & T-cel Primary T hel BLOOD  
 0.8127 ENCODE2012 K562 Leukem BLOOD  
 0.8971 HSC & B-cell Primary hemæ BLOOD  
 0.7613 ENCODE2012 Monocytes-C BLOOD  
 0.9280 Blood & T-cel Primary T hel BLOOD  
 0.9420 Blood & T-cel Primary T hel BLOOD  
 0.7594 ESC HUES48 Cells ESC  
 0.7940 Brain Brain Hippocæ BRAIN  
 0.6797 Epithelial Foreskin Melæ SKIN  
 0.7831 Digestive Rectal Mucos GI\_RECTUM  
 0.6470 Digestive Stomach Muc GI\_STOMACH  
 0.9437 Neurosph Ganglion Emi BRAIN  
 0.7790 Digestive Stomach Muc GI\_STOMACH  
 0.8012 HSC & B-cell Primary hemæ BLOOD  
 0.7891 Brain Brain Inferior BRAIN  
 0.9272 Brain Brain\_Dorsolæ BRAIN  
 0.6396 ENCODE2012 HepG2 Hepat LIVER  
 0.7744 Blood & T-cel Primary T CD8 BLOOD  
 0.9613 Blood & T-cel Primary T CD8 BLOOD  
 0.9937 ENCODE2012 NHDF-Ad Adu SKIN  
 0.8803 Blood & T-cel Primary T hel BLOOD  
 0.8210 Epithelial Foreskin Kera SKIN  
 0.6807 Epithelial Foreskin Fibræ SKIN  
 0.9880 HSC & B-cell Primary hemæ BLOOD  
 0.8832 ENCODE2012 A549 EtOH 0. LUNG  
 0.8172 Heart Left Ventricle HEART  
 0.8587 Epithelial Foreskin Kera SKIN  
 0.7709 HSC & B-cell Primary neutri BLOOD  
 0.7065 HSC & B-cell Primary hemæ BLOOD  
 0.7716 Other Placenta Amr PLACENTA  
 0.8616 Blood & T-cel Primary T cell BLOOD  
 0.7073 HSC & B-cell Primary neutri BLOOD  
 0.6440 Other Lung LUNG  
 0.9004 Digestive Fetal Intestinæ GI\_INTESTINE  
 0.9987 Muscle Skeletal Musc MUSCLE  
 0.9826 HSC & B-cell Primary B cell BLOOD  
 0.8758 Epithelial Foreskin Melæ SKIN  
 1.0000 HSC & B-cell Primary hemæ BLOOD  
 0.8201 ENCODE2012 GM12878 Lyr BLOOD  
 0.7627 Epithelial Foreskin Fibræ SKIN

0.8277 HSC & B-cell Primary hemæ BLOOD  
 0.7979 ES-deriv H9 Derived N ESC\_DERIVED  
 0.8137 Brain Brain Germin BRAIN  
 0.9169 Mesench Mesenchyma FAT  
 0.7022 Other Spleen SPLEEN  
 0.8979 Blood & T-cel Primary T cell BLOOD  
 0.9521 Thymus Thymus THYMUS  
 0.8611 Blood & T-cel Primary T cell BLOOD  
 0.7266 Epithelial Breast varian BREAST  
 0.7652 Digestive Fetal Intestin GI\_INTESTINE  
 0.9210 HSC & B-cell Primary neut BLOOD  
 0.8786 Epithelial Foreskin Fibr SKIN  
 0.7366 Blood & T-cel Primary T reg BLOOD  
 0.9105 Mesench Bone Marrow STROMAL\_CONNECTIVE  
 0.9980 Digestive Fetal Stomac GI\_STOMACH  
 0.8904 Brain Brain Hippocæ BRAIN  
 0.8172 Muscle Skeletal Musc MUSCLE  
 0.7968 ENCODE2012 K562 Leukem BLOOD  
 0.7670 ESC HUES64 Cells ESC  
 0.8009 Blood & T-cel Primary T hel BLOOD  
 0.7482 Other Liver LIVER  
 1.0000 HSC & B-cell Primary hemæ BLOOD  
 0.7790 Digestive Rectal Mucos GI\_RECTUM  
 0.9172 Other Fetal Adrenal ADRENAL  
 0.9162 Blood & T-cel Primary T reg BLOOD  
 0.7482 Blood & T-cel Primary T cell BLOOD  
 0.7436 HSC & B-cell Primary mon BLOOD  
 0.8894 Blood & T-cel Primary T CD8 BLOOD  
 0.8541 Brain Fetal Brain M BRAIN  
 0.9097 Mesench Adipose Deriv FAT  
 0.7784 HSC & B-cell Primary hemæ BLOOD  
 0.7492 Blood & T-cel Primary T hel BLOOD  
 1.0000 ENCODE2012 Osteoblast Pr BONE  
 0.9988 Sm. Muscle Stomach Smo GI\_STOMACH  
 0.8616 Neurosph Cortex derive BRAIN  
 0.7579 Blood & T-cel Primary T hel BLOOD  
 0.9162 Epithelial Foreskin Kera SKIN  
 1.0000 Heart Right Atrium HEART  
 0.9158 ENCODE2012 HMEC Mamr BREAST  
 0.9170 Digestive Rectal Mucos GI\_RECTUM  
 0.9160 ENCODE2012 A549 EtOH 0. LUNG  
 0.9441 Muscle Skeletal Musc MUSCLE  
 0.8909 Sm. Muscle Colon Smoot GI\_COLON



0.9270 Other Pancreas PANCREAS  
 0.9557 ENCODE2012 HepG2 Hepat LIVER  
 0.8559 ES-deriv H9 Derived N ESC\_DERIVED  
 0.7979 ESC H1 Cells ESC  
 0.7652 Digestive Rectal Mucos GI\_RECTUM  
 1.0000 ENCODE2012 HUVEC Umbil VASCULAR  
 0.6062 ENCODE2012 GM12878 Lyr BLOOD  
 0.8710 HSC & B-cell Primary Natu BLOOD  
 1.0000 Mesench Adipose Deriv FAT  
 0.6278 Heart Left Ventricle HEART  
 0.9170 Other Placenta PLACENTA  
 0.7333 ENCODE2012 HMEC Mamr BREAST  
 0.9606 Blood & T-cel Primary monc BLOOD  
 0.7638 Blood & T-cel Primary T CD8 BLOOD  
 0.8733 ENCODE2012 A549 EtOH 0. LUNG  
 0.7838 Brain Fetal Brain Fe BRAIN  
 1.0000 Heart Left Ventricle HEART  
 0.7612 Digestive Rectal Mucos GI\_RECTUM  
 1.0000 Epithelial Foreskin Melc SKIN  
 1.0000 ENCODE2012 HSMM Skelet MUSCLE  
 0.6728 ESC HUES64 Cells ESC  
 0.7373 ENCODE2012 Dnd41 TCell L BLOOD  
 0.7373 HSC & B-cell Primary hemc BLOOD  
 0.8603 Brain Brain\_Dorsolc BRAIN  
 1.0000 Blood & T-cel Primary T hel BLOOD  
 1.0000 Other Pancreas PANCREAS  
 0.9270 ENCODE2012 Dnd41 TCell L BLOOD  
 0.9272 Blood & T-cel Primary T hel BLOOD  
 0.9208 Brain Brain Germin BRAIN  
 0.9162 Adipose Adipose Nuclc FAT  
 1.0000 Muscle Psoas Muscle MUSCLE  
 1.0000 Other Fetal Lung LUNG  
 0.8347 Mesench Adipose Deriv FAT  
 0.9670 ENCODE2012 NHEK-Epiderr SKIN  
 1.0000 iPSC iPS DF 19.11 (IPSC  
 1.0000 IMR90 IMR90 fetal l LUNG  
 1.0000 Epithelial Foreskin Fibr SKIN  
 0.8044 Mesench Mesenchyma STROMAL\_CONNECTIVE  
 0.9184 Muscle Skeletal Musc MUSCLE  
 0.7865 ES-deriv H1 Derived N ESC\_DERIVED  
 0.8299 Neurosph Cortex derive BRAIN  
 0.8819 ES-deriv H1 Derived M ESC\_DERIVED  
 0.9105 Digestive Gastric GI\_STOMACH

1.0000 Blood & T-cel Primary T hel BLOOD  
 0.8850 Blood & T-cel Primary T hel BLOOD  
 0.8990 ES-deriv hESC Derived ESC\_DERIVED  
 1.0000 ES-deriv H9 Derived N ESC\_DERIVED  
 1.0000 Sm. Muscle Colon Smooth GI\_COLON  
 0.9219 Blood & T-cel Primary T hel BLOOD  
 0.6335 Brain Brain Cingula BRAIN  
 1.0000 Other Pancreatic Isl PANCREAS  
 1.0000 Epithelial Foreskin Kera SKIN  
 0.7979 ENCODE2012 NHLF Lung Fit LUNG  
 0.9458 ENCODE2012 HSMM Skelet MUSCLE  
 0.9346 iPSC iPS-20b Cells IPSC  
 0.7156 Blood & T-cel Primary T hel BLOOD  
 0.7999 ENCODE2012 K562 Leukem BLOOD  
 1.0000 Other Placenta PLACENTA  
 0.6872 ESC ES-UCSF4 Cell ESC  
 0.9831 Other Fetal Adrenal ADRENAL  
 0.6973 Digestive Sigmoid Color GI\_COLON  
 0.9753 Digestive Fetal Stomach GI\_STOMACH  
 1.0000 ENCODE2012 NHLF Lung Fit LUNG  
 0.7172 Other Ovary OVARY  
 0.7551 iPSC iPS DF 19.11 IPSC  
 1.0000 Other Spleen SPLEEN  
 1.0000 Blood & T-cel Primary T cell BLOOD  
 1.0000 ENCODE2012 HepG2 Hepat LIVER  
 0.7709 Other Spleen SPLEEN  
 0.6624 HSC & B-cell Primary B cell BLOOD  
 0.9272 Other Fetal Lung LUNG  
 1.0000 Blood & T-cel Primary T hel BLOOD  
 0.6508 Other Liver LIVER  
 1.0000 Epithelial Foreskin Mel SKIN  
 1.0000 Myosat Muscle Satell MUSCLE  
 0.6149 Mesench Bone Marrow STROMAL\_CONNECTIVE  
 0.8476 Heart Fetal Heart HEART  
 0.9919 ENCODE2012 Osteoblast Pr BONE  
 0.7831 Blood & T-cel Primary T cell BLOOD  
 0.9184 ENCODE2012 NH-A Astrocy BRAIN  
 1.0000 Brain Brain Anterio BRAIN  
 0.7691 Sm. Muscle Colon Smooth GI\_COLON  
 1.0000 Sm. Muscle Rectal Smoot GI\_RECTUM  
 1.0000 ES-deriv H9 Derived N ESC\_DERIVED  
 0.7506 ES-deriv H9 Derived N ESC\_DERIVED  
 0.6847 iPSC iPS-20b Cells IPSC

1.0000 Brain Brain Hippoc BRAIN  
 0.7490 iPSC iPSC-18 Cells IPSC  
 1.0000 IMR90 IMR90 fetal lu LUNG  
 0.9482 Blood & T-cel Primary T cell BLOOD  
 1.0000 Digestive Duodenum M GI\_DUODENUM  
 0.6179 Epithelial Foreskin Kera SKIN  
 1.0000 Mesench Mesenchyma FAT  
 1.0000 HSC & B-cell Primary B cell BLOOD  
 0.8954 ES-deriv H9 Derived N ESC\_DERIVED  
 1.0000 Digestive Fetal Intestin GI\_INTESTINE  
 0.9968 ENCODE2012 HUVEC Umbil VASCULAR  
 0.9961 Blood & T-cel Primary T hel BLOOD  
 0.7575 ENCODE2012 Monocytes-C BLOOD  
 0.8826 Sm. Muscle Stomach Smo GI\_STOMACH  
 0.9438 Digestive Stomach Muc GI\_STOMACH  
 0.9270 iPSC iPSC-18 Cells IPSC  
 0.9836 Blood & T-cel Primary T hel BLOOD  
 0.8841 Digestive Fetal Intestin GI\_INTESTINE  
 0.8861 ES-deriv hESC Derived ESC\_DERIVED  
 1.0000 Other Lung LUNG  
 0.9280 ENCODE2012 HeLa-S3 Cervi CERVIX  
 0.9353 Other Pancreas PANCREAS  
 0.8201 Blood & T-cel Primary T cell BLOOD  
 0.7398 ES-deriv H1 BMP4 Der ESC\_DERIVED  
 1.0000 Muscle Skeletal Musc MUSCLE  
 0.8507 Sm. Muscle Stomach Smo GI\_STOMACH  
 0.7697 Blood & T-cel Primary T hel BLOOD  
 1.0000 ESC ES-WA7 Cells ESC  
 1.0000 ENCODE2012 HMEC Mamr BREAST  
 0.9966 ENCODE2012 NH-A Astrocy BRAIN  
 1.0000 Epithelial Breast varian BREAST  
 1.0000 Digestive Rectal Mucos GI\_RECTUM  
 1.0000 Mesench Bone Marrow STROMAL\_CONNECTIVE  
 0.7613 Blood & T-cel Primary T hel BLOOD  
 0.9982 Blood & T-cel Primary T hel BLOOD  
 0.6731 Myosat Muscle Satell MUSCLE  
 0.9310 HSC & B-cell Primary Natu BLOOD  
 1.0000 Blood & T-cel Primary T reg BLOOD  
 0.8786 Epithelial Foreskin Kera SKIN  
 1.0000 ENCODE2012 Monocytes-C BLOOD  
 0.8176 Neurosph Ganglion Emi BRAIN  
 1.0000 ENCODE2012 NHEK-Epiderr SKIN  
 1.0000 ES-deriv hESC Derived ESC\_DERIVED

0.8587 Blood & T-cell Primary mon BLOOD  
 0.8057 Epithelial Foreskin Fibro SKIN  
 0.8446 Mesench Bone Marrow STROMAL\_CONNECTIVE  
 0.7025 Epithelial Foreskin Fibro SKIN  
 1.0000 Epithelial Breast Myoep BREAST  
 1.0000 Adipose Adipose Nucl FAT  
 0.9272 Other Lung LUNG  
 0.9248 Brain Brain\_Dorsol BRAIN  
 0.9742 Adipose Adipose Nucl FAT  
 0.6876 Epithelial Foreskin Fibro SKIN  
 1.0000 Muscle Fetal Muscle MUSCLE\_LEG  
 1.0000 Heart Fetal Heart HEART  
 0.7781 Blood & T-cell Primary T cell BLOOD  
 1.0000 ESC ES-UCSF4 Cell ESC  
 0.6964 ENCODE2012 NHLF Lung Fibro LUNG  
 1.0000 Epithelial Breast Myoep BREAST  
 0.8760 ES-deriv hESC Derived ESC\_DERIVED  
 0.9161 Sm. Muscle Duodenum Sr GI\_DUODENUM  
 1.0000 HSC & B-cell Primary mon BLOOD  
 0.6807 iPSC iPS DF 19.11 (IPSC  
 0.7613 Blood & T-cell Primary T CD8 BLOOD  
 0.7847 Other Pancreas PANCREAS  
 0.9966 ENCODE2012 NHDF-Ad Ad SKIN  
 0.6263 Digestive Sigmoid Colon GI\_COLON  
 0.9274 ES-deriv H1 BMP4 Der ESC\_DERIVED  
 1.0000 Blood & T-cell Primary T cell BLOOD  
 0.7658 HSC & B-cell Primary hem BLOOD  
 1.0000 Epithelial Foreskin Fibro SKIN  
 0.9966 Heart Left Ventricle HEART  
 1.0000 Muscle Fetal Muscle MUSCLE\_LEG  
 0.9966 Muscle Fetal Muscle MUSCLE\_LEG  
 0.7998 iPSC iPS-20b Cells IPSC  
 0.6912 Other Fetal Kidney KIDNEY  
 1.0000 HSC & B-cell Primary hem BLOOD  
 0.6502 Blood & T-cell Primary T cell BLOOD  
 0.8499 ES-deriv H9 Derived N ESC\_DERIVED  
 1.0000 Mesench Mesenchyma STROMAL\_CONNECTIVE  
 1.0000 Sm. Muscle Duodenum Sr GI\_DUODENUM  
 0.8308 iPSC iPS DF 6.9 Cell IPSC  
 1.0000 ES-deriv hESC Derived ESC\_DERIVED  
 1.0000 Digestive Rectal Mucos GI\_RECTUM  
 1.0000 Heart Right Ventricle HEART  
 0.9718 Brain Brain Inferior BRAIN

0.7024 ES-deriv hESC Derived ESC\_DERIVED  
 0.8796 Mesench Mesenchyma FAT  
 1.0000 ENCODE2012 HSMM cell de MUSCLE  
 0.9941 Thymus Fetal Thymus THYMUS  
 0.8979 ENCODE2012 NHEK-Epiderr SKIN  
 0.9990 ENCODE2012 HMEC Mamr BREAST  
 0.8201 ENCODE2012 HUVEC Umbil VASCULAR  
 0.9738 Muscle Fetal Muscle MUSCLE  
 0.9327 iPSC iPS DF 19.11 (IPSC  
 1.0000 ES-deriv H1 Derived M ESC\_DERIVED  
 0.9463 Brain Brain Substar BRAIN  
 0.9605 iPSC iPS DF 19.11 (IPSC  
 0.8904 Blood & T-cel Primary T reg BLOOD  
 1.0000 iPSC iPS-20b Cells IPSC  
 0.7056 Blood & T-cel Primary T hel BLOOD  
 1.0000 Mesench Mesenchyma STROMAL\_CONNECTIVE  
 0.8541 ENCODE2012 HMEC Mamr BREAST  
 0.8905 Digestive Duodenum V GI\_DUODENUM  
 0.8796 Brain Brain Substar BRAIN  
 0.9591 Muscle Psoas Muscle MUSCLE  
 0.8633 Epithelial Foreskin Mel SKIN  
 0.8747 ENCODE2012 Dnd41 TCell L BLOOD  
 0.9253 Epithelial Breast Myoe BREAST  
 0.9356 ESC H1 Cells ESC  
 1.0000 Other Liver LIVER  
 1.0000 Brain Brain Cingula BRAIN  
 1.0000 ES-deriv hESC Derived ESC\_DERIVED  
 1.0000 Thymus Fetal Thymus THYMUS  
 1.0000 Other Spleen SPLEEN  
 0.9732 ES-deriv hESC Derived ESC\_DERIVED  
 1.0000 ES-deriv H1 BMP4 Der ESC\_DERIVED  
 0.9777 Epithelial Foreskin Mel SKIN  
 0.9976 ENCODE2012 NHLF Lung Fil LUNG  
 0.8288 Mesench Mesenchyma STROMAL\_CONNECTIVE  
 0.9004 Sm. Muscle Rectal Smoot GI\_RECTUM  
 1.0000 ENCODE2012 HepG2 Hepat LIVER  
 0.9926 Brain Brain Substar BRAIN  
 1.0000 Other Placenta Amr PLACENTA  
 0.8248 Sm. Muscle Colon Smoot GI\_COLON  
 1.0000 Epithelial Foreskin Kera SKIN  
 1.0000 iPSC iPS DF 19.11 (IPSC  
 0.6783 Blood & T-cel Primary T cell BLOOD  
 0.9982 Epithelial Foreskin Fibrc SKIN

0.7784 ES-deriv H1 Derived M ESC\_DERIVED  
 0.7995 iPSC iPS-15b Cells IPSC  
 0.6907 Digestive Gastric GI\_STOMACH  
 1.0000 HSC & B-cell Primary hemꜰ BLOOD  
 0.8905 ENCODE2012 NHDF-Ad Adꜰ SKIN  
 0.9836 Digestive Fetal Stomacꜰ GI\_STOMACH  
 0.8747 ES-deriv hESC Derived ESC\_DERIVED  
 0.8677 Blood & T-cel Primary T cell BLOOD  
 0.9990 ES-deriv H9 Derived N ESC\_DERIVED  
 0.6784 Other Fetal Lung LUNG  
 0.8468 Muscle Fetal Muscle MUSCLE\_LEG  
 1.0000 ESC HUES48 Cells ESC  
 0.7231 Digestive Gastric GI\_STOMACH  
 1.0000 HSC & B-cell Primary hemꜰ BLOOD  
 0.8918 Muscle Skeletal Musc MUSCLE  
 0.9506 ESC HUES6 Cells ESC  
 0.8221 Epithelial Foreskin Kera SKIN  
 0.9961 Digestive Duodenum IV GI\_DUODENUM  
 0.7897 Blood & T-cel Primary T hel BLOOD  
 0.8896 HSC & B-cell Primary hemꜰ BLOOD  
 1.0000 ENCODE2012 GM12878 Lyr BLOOD  
 1.0000 ENCODE2012 GM12878 Lyr BLOOD  
 0.9248 Brain Brain Germin BRAIN  
 0.8500 ES-deriv H1 BMP4 Der ESC\_DERIVED  
 1.0000 Epithelial Foreskin Kera SKIN  
 0.6370 HSC & B-cell Primary hemꜰ BLOOD  
 1.0000 Digestive Fetal Intestinꜰ GI\_INTESTINE  
 0.8811 Blood & T-cel Primary T hel BLOOD  
 0.9718 Other Fetal Lung LUNG  
 0.9841 ENCODE2012 HepG2 Hepat LIVER  
 1.0000 HSC & B-cell Primary hemꜰ BLOOD  
 0.9826 IMR90 IMR90 fetal lꜰ LUNG  
 0.9821 Digestive Fetal Stomacꜰ GI\_STOMACH  
 0.7359 Sm. Muscle Rectal Smoot GI\_RECTUM  
 1.0000 Thymus Fetal Thymus THYMUS  
 0.8430 Other Placenta PLACENTA  
 0.9985 ENCODE2012 HSMM Skelet MUSCLE  
 0.8044 Epithelial Breast varianꜰ BREAST  
 0.9543 iPSC iPS-18 Cells IPSC  
 1.0000 ES-deriv hESC Derived ESC\_DERIVED  
 0.8932 ENCODE2012 NHEK-Epiderr SKIN  
 0.9543 Epithelial Foreskin Kera SKIN  
 0.9004 ESC ES-13 Cells ESC

0.8242 Digestive Sigmoid Color GI\_COLON  
 1.0000 Digestive Gastric GI\_STOMACH  
 0.8687 Blood & T-cell Primary T cell BLOOD  
 1.0000 Epithelial Foreskin Kera SKIN  
 0.6407 Other Liver LIVER  
 1.0000 ES-deriv hESC Derived ESC\_DERIVED  
 1.0000 IMR90 IMR90 fetal LUNG  
 0.6422 ENCODE2012 Osteoblast Pr BONE  
 0.7611 Brain Brain Germin BRAIN  
 0.8541 ENCODE2012 NHDF-Ad Ad SKIN  
 1.0000 ESC ES-13 Cells ESC  
 0.8294 Other Fetal Adrenal ADRENAL  
 0.8479 Blood & T-cell Primary T reg BLOOD  
 0.8079 ENCODE2012 HUVEC Umbil VASCULAR  
 1.0000 Digestive Sigmoid Color GI\_COLON  
 0.9203 Blood & T-cell Primary T hel BLOOD  
 1.0000 ESC H1 Cells ESC  
 1.0000 Digestive Esophagus GI\_ESOPHAGUS  
 1.0000 HSC & B-cell Primary Natu BLOOD  
 0.9753 Brain Brain Angular BRAIN  
 1.0000 ENCODE2012 NHDF-Ad Ad SKIN  
 0.8708 Blood & T-cell Primary T CD4 BLOOD  
 0.8982 Digestive Duodenum V GI\_DUODENUM  
 1.0000 Other Fetal Lung LUNG  
 1.0000 HSC & B-cell Primary mon BLOOD  
 1.0000 Heart Right Ventricl HEART  
 0.6892 Other Placenta Amr PLACENTA  
 0.8319 ES-deriv hESC Derived ESC\_DERIVED  
 0.8394 HSC & B-cell Primary mon BLOOD  
 0.8536 ESC HUES64 Cells ESC  
 0.7617 Blood & T-cell Primary T hel BLOOD  
 0.6723 Epithelial Foreskin Fibr SKIN  
 0.9981 ENCODE2012 HSMM cell de MUSCLE  
 1.0000 Muscle Fetal Muscle MUSCLE  
 0.7312 Digestive Fetal Intestin GI\_INTESTINE  
 0.9441 ESC HUES48 Cells ESC  
 1.0000 ENCODE2012 Osteoblast Pr BONE  
 1.0000 ES-deriv H9 Derived N ESC\_DERIVED  
 1.0000 ENCODE2012 NHEK-Epiderr SKIN  
 0.9683 Blood & T-cell Primary T cell BLOOD  
 1.0000 Heart Aorta VASCULAR  
 1.0000 Muscle Skeletal Musc MUSCLE  
 1.0000 Epithelial Foreskin Mel SKIN

0.6742 ES-deriv H9 Derived N ESC\_DERIVED  
 1.0000 ENCODE2012 Monocytes-C BLOOD  
 0.9044 Thymus Fetal Thymus THYMUS  
 1.0000 ESC HUES64 Cells ESC  
 0.8977 ENCODE2012 NH-A Astrocy BRAIN  
 0.9434 Brain Brain Anterio BRAIN  
 0.7225 ENCODE2012 K562 Leukem BLOOD  
 1.0000 HSC & B-cell Primary hemæ BLOOD  
 0.7081 Epithelial Foreskin Kera SKIN  
 1.0000 ESC H9 Cells ESC  
 0.8319 Epithelial Foreskin Fibrc SKIN  
 0.7428 Brain Brain Hippocæ BRAIN  
 1.0000 iPSC iPS-15b Cells IPSC  
 1.0000 Other Placenta PLACENTA  
 0.8877 ESC HUES48 Cells ESC  
 0.9961 Epithelial Foreskin Melæ SKIN  
 0.8831 ENCODE2012 NHEK-Epiderr SKIN  
 0.9008 Other Fetal Lung LUNG  
 1.0000 ES-deriv H1 BMP4 Der ESC\_DERIVED  
 0.6508 Neurosph Cortex derive BRAIN  
 0.9893 Sm. Muscle Duodenum Sr GI\_DUODENUM  
 0.6954 Other Lung LUNG  
 0.9162 ES-deriv H1 BMP4 Der ESC\_DERIVED  
 0.9172 Epithelial Breast Myoeæ BREAST  
 0.9162 Brain Brain Cingulaæ BRAIN  
 0.9203 Epithelial Foreskin Fibrc SKIN  
 1.0000 Epithelial Breast Myoeæ BREAST  
 0.8841 Thymus Thymus THYMUS  
 0.6508 ENCODE2012 NHLF Lung Fil LUNG  
 1.0000 ESC HUES6 Cells ESC  
 0.9880 HSC & B-cell Primary hemæ BLOOD  
 0.9782 iPSC iPS-20b Cells IPSC  
 1.0000 Muscle Fetal Muscle MUSCLE  
 0.9253 Neurosph Ganglion Emi BRAIN  
 1.0000 Epithelial Breast varianæ BREAST  
 1.0000 Blood & T-cel Primary T hel BLOOD  
 0.8285 Digestive Rectal Mucos GI\_RECTUM  
 0.7518 ES-deriv hESC Derived ESC\_DERIVED  
 0.9169 Digestive Gastric GI\_STOMACH  
 0.9636 ES-deriv H1 BMP4 Der ESC\_DERIVED  
 0.8841 ES-deriv hESC Derived ESC\_DERIVED  
 0.9203 IMR90 IMR90 fetal lt LUNG  
 1.0000 ENCODE2012 GM12878 Lyr BLOOD



0.9911 HSC & B-cell Primary hemæ BLOOD  
 1.0000 ES-deriv hESC Derived ESC\_DERIVED  
 0.9521 Digestive Duodenum M GI\_DUODENUM  
 0.8479 ENCODE2012 GM12878 Lyr BLOOD  
 0.8214 Sm. Muscle Rectal Smoot GI\_RECTUM  
 1.0000 Epithelial Foreskin Melc SKIN  
 0.7032 ENCODE2012 HMEC Mamr BREAST  
 1.0000 ES-deriv H1 BMP4 Der ESC\_DERIVED  
 0.9174 Mesench Mesenchyma STROMAL\_CONNECTIVE  
 0.7038 Digestive Small Intestin GI\_INTESTINE  
 0.6847 Brain Brain Inferior BRAIN  
 0.9420 Neurosph Ganglion Emi BRAIN  
 1.0000 Sm. Muscle Stomach Smo GI\_STOMACH  
 1.0000 iPSC iPS DF 6.9 Cel IPSC  
 0.9602 ES-deriv hESC Derived ESC\_DERIVED  
 1.0000 iPSC iPS-18 Cells IPSC  
 1.0000 ESC H1 Cells ESC  
 0.9356 Blood & T-cel Primary T cell BLOOD  
 0.7051 Blood & T-cel Primary monc BLOOD  
 0.6864 Other Fetal Kidney KIDNEY  
 1.0000 Digestive Colonic Muco GI\_COLON  
 0.9114 ENCODE2012 GM12878 Lyr BLOOD  
 0.9310 Digestive Fetal Intestin GI\_INTESTINE  
 0.6872 Blood & T-cel Primary T CDc BLOOD  
 0.9270 Other Spleen SPLEEN  
 0.7259 IMR90 IMR90 fetal lu LUNG  
 1.0000 Sm. Muscle Colon Smootf GI\_COLON  
 1.0000 ESC HUES6 Cells ESC  
 0.8496 Muscle Fetal Muscle MUSCLE  
 1.0000 Epithelial Foreskin Fibr SKIN  
 0.8214 HSC & B-cell Primary hemæ BLOOD  
 0.8786 Blood & T-cel Primary T hel BLOOD  
 0.9623 Mesench Mesenchyma FAT  
 0.8808 Heart Right Ventricl HEART  
 0.9420 Epithelial Foreskin Fibr SKIN  
 0.9703 Mesench Adipose Deriv FAT  
 0.7976 Epithelial Breast varian BREAST  
 1.0000 Epithelial Breast varian BREAST  
 1.0000 HSC & B-cell Primary B cell BLOOD  
 1.0000 Digestive Esophagus GI\_ESOPHAGUS  
 0.8796 ESC HUES6 Cells ESC  
 1.0000 Digestive Rectal Mucos GI\_RECTUM  
 0.8603 Neurosph Ganglion Emi BRAIN

0.6651 Other Fetal Adrenal ADRENAL  
 1.0000 ES-deriv H9 Derived N ESC\_DERIVED  
 0.9543 Epithelial Foreskin Fibro SKIN  
 0.9543 Mesench Adipose Deriv FAT  
 0.9105 Mesench Mesenchyma FAT  
 0.9683 Heart Aorta VASCULAR  
 1.0000 ENCODE2012 HSMM cell de MUSCLE  
 1.0000 Brain Brain Angular BRAIN  
 0.9770 HSC & B-cell Primary B cell BLOOD  
 0.6667 ESC HUES6 Cells ESC  
 0.9831 ESC H9 Cells ESC  
 0.9340 Digestive Fetal Stomach GI\_STOMACH  
 0.9789 iPSC iPS-18 Cells IPSC  
 0.9113 HSC & B-cell Primary mono BLOOD  
 1.0000 Digestive Rectal Mucos GI\_RECTUM  
 1.0000 Blood & T-cell Primary T CD8 BLOOD  
 0.7187 HSC & B-cell Primary hemato BLOOD  
 0.8988 Muscle Skeletal Musc MUSCLE  
 0.9086 Neurosph Ganglion Emi BRAIN  
 0.7637 ESC HUES6 Cells ESC  
 0.9425 ENCODE2012 NH-A Astrocy BRAIN  
 1.0000 ESC HUES64 Cells ESC  
 0.7373 Digestive Rectal Mucos GI\_RECTUM  
 0.9041 Blood & T-cell Primary T hel BLOOD  
 0.9870 ESC ES-13 Cells ESC  
 0.8983 ENCODE2012 HSMM cell de MUSCLE  
 1.0000 Neurosph Ganglion Emi BRAIN  
 0.9805 Brain Brain Angular BRAIN  
 0.8263 Muscle Skeletal Musc MUSCLE  
 0.9639 Heart Left Ventricle HEART  
 0.9533 ESC ES-UCSF4 Cell ESC  
 0.9976 Other Pancreatic Isl PANCREAS  
 0.8041 HSC & B-cell Primary hemato BLOOD  
 0.8041 Heart Aorta VASCULAR  
 0.6991 Other Spleen SPLEEN  
 0.9509 Digestive Fetal Intestine GI\_INTESTINE  
 1.0000 ENCODE2012 HepG2 Hepat LIVER  
 1.0000 iPSC iPS-15b Cells IPSC  
 0.8590 ES-deriv hESC Derived ESC\_DERIVED  
 0.9934 Heart Right Atrium HEART  
 1.0000 Thymus Thymus THYMUS  
 0.9740 ESC HUES48 Cells ESC  
 0.7009 Muscle Skeletal Musc MUSCLE

0.7884 Blood & T-cel Primary T reg BLOOD  
 0.7884 Digestive Gastric GI\_STOMACH  
 0.9356 ES-deriv H9 Derived N ESC\_DERIVED  
 0.9149 Blood & T-cel Primary T hel BLOOD  
 0.9441 Brain Brain Angular BRAIN  
 0.8957 iPSC iPS-18 Cells IPSC  
 0.8789 Digestive Rectal Mucos GI\_RECTUM  
 0.9893 HSC & B-cell Primary hemæ BLOOD  
 0.9574 ENCODE2012 Osteoblast Pr BONE  
 0.7575 iPSC iPS DF 6.9 Cel IPSC  
 0.7790 ENCODE2012 K562 Leukem BLOOD  
 0.9425 Epithelial Foreskin Kera SKIN  
 1.0000 Thymus Thymus THYMUS  
 0.6783 ESC ES-UCSF4 Cel ESC  
 0.9782 ENCODE2012 A549 EtOH 0. LUNG  
 0.7038 HSC & B-cell Primary B cell BLOOD  
 1.0000 Digestive Fetal Intestin GI\_INTESTINE  
 0.9831 ENCODE2012 NHEK-Epider SKIN  
 0.7448 Epithelial Foreskin Mel SKIN  
 0.7961 Heart Right Atrium HEART  
 0.9117 Digestive Colonic Muco GI\_COLON  
 1.0000 Myosat Muscle Satell MUSCLE  
 0.9831 ENCODE2012 NHLF Lung Fil LUNG  
 0.9371 ES-deriv H1 Derived M ESC\_DERIVED  
 1.0000 Other Pancreas PANCREAS  
 0.8826 Blood & T-cel Primary T cell BLOOD  
 0.9004 Sm. Muscle Duodenum Sr GI\_DUODENUM  
 0.8653 ESC H1 Cells ESC  
 1.0000 Brain Brain Substar BRAIN  
 0.7490 ES-deriv H9 Derived N ESC\_DERIVED  
 1.0000 ESC ES-WA7 Cells ESC  
 0.7655 Mesench Adipose Deriv FAT  
 0.6807 Blood & T-cel Primary T hel BLOOD  
 0.9629 Epithelial Breast varian BREAST  
 0.8590 Muscle Skeletal Musc MUSCLE  
 0.9524 Digestive Small Intestin GI\_INTESTINE  
 0.7690 Myosat Muscle Satell MUSCLE  
 0.9961 ENCODE2012 GM12878 Lyr BLOOD  
 0.9826 Digestive Colonic Muco GI\_COLON  
 0.9683 Mesench Adipose Deriv FAT  
 0.6844 ENCODE2012 NHLF Lung Fil LUNG  
 0.9551 ES-deriv H9 Derived N ESC\_DERIVED  
 1.0000 Digestive Fetal Intestin GI\_INTESTINE

0.7829 Sm. Muscle Stomach Smo GI\_STOMACH  
 0.9180 HSC & B-cell Primary B cell BLOOD  
 1.0000 Thymus Fetal Thymus THYMUS  
 0.7968 ES-deriv H1 BMP4 Der ESC\_DERIVED  
 0.7863 Mesench Mesenchyma FAT  
 0.9201 Sm. Muscle Colon Smooth GI\_COLON  
 1.0000 Adipose Adipose Nucl FAT  
 0.9826 Digestive Esophagus GI\_ESOPHAGUS  
 0.9851 Other Fetal Adrenal ADRENAL  
 0.9633 Muscle Skeletal Musc MUSCLE  
 0.8229 Blood & T-cell Primary T hel BLOOD  
 0.7731 Myosat Muscle Satell MUSCLE  
 0.9875 Muscle Fetal Muscle MUSCLE  
 1.0000 ESC ES-WA7 Cells ESC  
 0.9103 ESC HUES48 Cells ESC  
 1.0000 Blood & T-cell Primary T cell BLOOD  
 0.9937 Myosat Muscle Satell MUSCLE  
 0.9990 Adipose Adipose Nucl FAT  
 0.9442 Muscle Skeletal Musc MUSCLE  
 1.0000 ENCODE2012 HUVEC Umbil VASCULAR  
 1.0000 Heart Fetal Heart HEART  
 0.9988 Epithelial Breast varian BREAST  
 0.7210 HSC & B-cell Primary mon BLOOD  
 0.9463 ES-deriv H1 BMP4 Der ESC\_DERIVED  
 0.7212 Heart Aorta VASCULAR  
 1.0000 Heart Fetal Heart HEART  
 1.0000 Epithelial Foreskin Fibr SKIN  
 1.0000 Sm. Muscle Stomach Smo GI\_STOMACH  
 0.8764 ESC HUES6 Cells ESC  
 0.8603 ESC ES-UCSF4 Cel ESC  
 0.7655 ES-deriv H1 BMP4 Der ESC\_DERIVED  
 0.7655 Digestive Esophagus GI\_ESOPHAGUS  
 0.6909 ENCODE2012 HUVEC Umbil VASCULAR  
 0.9884 Other Lung LUNG  
 0.6912 ES-deriv H1 BMP4 Der ESC\_DERIVED  
 1.0000 Mesench Adipose Deriv FAT  
 0.9826 Myosat Muscle Satell MUSCLE  
 1.0000 Digestive Esophagus GI\_ESOPHAGUS  
 0.7824 Mesench Mesenchyma STROMAL\_CONNECTIVE  
 0.9789 Brain Brain Germin BRAIN  
 0.9356 ES-deriv H1 Derived M ESC\_DERIVED  
 1.0000 iPSC iPS DF 19.11 (IPSC  
 0.9270 HSC & B-cell Primary mon BLOOD

|        |               |                |                    |
|--------|---------------|----------------|--------------------|
| 0.9371 | Heart         | Aorta          | VASCULAR           |
| 0.9522 | ESC           | H9 Cells       | ESC                |
| 0.9549 | Other         | Fetal Adrenal  | ADRENAL            |
| 0.9174 | ESC           | ES-I3 Cells    | ESC                |
| 1.0000 | Digestive     | Rectal Mucos   | GI_RECTUM          |
| 0.9836 | Other         | Fetal Kidney   | KIDNEY             |
| 0.9670 | Digestive     | Stomach Muc    | GI_STOMACH         |
| 1.0000 | Mesench       | Mesenchyma     | FAT                |
| 1.0000 | Sm. Muscle    | Duodenum Sr    | GI_DUODENUM        |
| 1.0000 | ENCODE2012    | A549 EtOH 0.   | LUNG               |
| 1.0000 | Mesench       | Bone Marrow    | STROMAL_CONNECTIVE |
| 1.0000 | Sm. Muscle    | Rectal Smoot   | GI_RECTUM          |
| 1.0000 | Brain         | Brain_Dorsol   | BRAIN              |
| 0.9160 | Epithelial    | Foreskin Mel   | SKIN               |
| 0.9105 | Digestive     | Fetal Intestin | GI_INTESTINE       |
| 0.9706 | Blood & T-cel | Primary T hel  | BLOOD              |
| 0.8587 | Brain         | Brain Angular  | BRAIN              |
| 0.9084 | Other         | Placenta Amr   | PLACENTA           |
| 0.9985 | Other         | Liver          | LIVER              |
| 0.7738 | Other         | Placenta       | PLACENTA           |
| 1.0000 | ES-deriv      | hESC Derived   | ESC_DERIVED        |
| 0.9397 | Digestive     | Stomach Muc    | GI_STOMACH         |
| 1.0000 | iPSC          | iPS DF 6.9 Cel | IPSC               |
| 1.0000 | Other         | Fetal Kidney   | KIDNEY             |
| 0.8230 | Heart         | Right Atrium   | HEART              |
| 1.0000 | Other         | Fetal Adrenal  | ADRENAL            |
| 1.0000 | Brain         | Brain Hippoc   | BRAIN              |
| 0.8248 | ESC           | H9 Cells       | ESC                |
| 0.9041 | ENCODE2012    | HSMM Skelet    | MUSCLE             |
| 1.0000 | Neurosph      | Cortex derive  | BRAIN              |
| 0.9426 | Brain         | Fetal Brain M  | BRAIN              |
| 0.9979 | Brain         | Fetal Brain Fe | BRAIN              |
| 0.9506 | Thymus        | Fetal Thymus   | THYMUS             |
| 0.9408 | ENCODE2012    | NHLF Lung Fil  | LUNG               |
| 1.0000 | ENCODE2012    | HSMM Skelet    | MUSCLE             |
| 0.9798 | Other         | Fetal Kidney   | KIDNEY             |
| 0.7043 | Blood & T-cel | Primary T hel  | BLOOD              |
| 0.9997 | ENCODE2012    | K562 Leukem    | BLOOD              |
| 1.0000 | ENCODE2012    | HeLa-S3 Cervi  | CERVIX             |
| 0.9577 | ENCODE2012    | Monocytes-C    | BLOOD              |
| 0.9162 | iPSC          | iPS-15b Cells  | IPSC               |
| 0.9651 | ES-deriv      | H9 Derived N   | ESC_DERIVED        |
| 0.9936 | Epithelial    | Foreskin Kera  | SKIN               |

1.0000 Muscle Fetal Muscle MUSCLE\_LEG  
 0.9850 HSC & B-cell Primary neutri BLOOD  
 0.7065 HSC & B-cell Primary B cell BLOOD  
 0.9924 HSC & B-cell Primary hemæ BLOOD  
 0.7658 ES-deriv hESC Derived ESC\_DERIVED  
 1.0000 ENCODE2012 HSMM cell de MUSCLE  
 0.8031 Brain Brain\_Dorsolæ BRAIN  
 0.7665 ENCODE2012 NHEK-Epiderr SKIN  
 1.0000 iPSC iPS-20b Cells IPSC  
 0.7073 Heart Right Atrium HEART  
 0.9694 iPSC iPS-20b Cells IPSC  
 1.0000 ESC ES-UCSF4 Cel ESC  
 0.7106 Mesench Mesenchyma STROMAL\_CONNECTIVE  
 0.9558 Mesench Mesenchyma FAT  
 1.0000 ENCODE2012 K562 Leukem BLOOD  
 1.0000 iPSC iPS DF 19.11 (IPSC  
 0.9521 Digestive Fetal Intestinæ GI\_INTESTINE  
 0.9648 iPSC iPS DF 19.11 (IPSC  
 1.0000 Blood & T-cel Primary monæ BLOOD  
 0.8882 ES-deriv H1 BMP4 Der ESC\_DERIVED  
 0.9441 Brain Brain Hippocæ BRAIN  
 1.0000 Digestive Rectal Mucosæ GI\_RECTUM  
 0.9169 ES-deriv H1 Derived M ESC\_DERIVED  
 1.0000 Epithelial Foreskin Melæ SKIN  
 1.0000 ES-deriv H9 Derived N ESC\_DERIVED  
 0.8146 Other Fetal Kidney KIDNEY  
 0.7731 ENCODE2012 NHEK-Epiderr SKIN  
 0.8905 HSC & B-cell Primary hemæ BLOOD  
 1.0000 Sm. Muscle Stomach Smoæ GI\_STOMACH  
 1.0000 ES-deriv hESC Derived ESC\_DERIVED  
 0.9826 Other Liver LIVER  
 1.0000 ESC HUES6 Cells ESC  
 0.9670 Blood & T-cel Primary T cell BLOOD  
 0.7968 Digestive Fetal Intestinæ GI\_INTESTINE  
 0.7177 Epithelial Foreskin Fibræ SKIN  
 1.0000 iPSC iPS-20b Cells IPSC  
 1.0000 Mesench Mesenchyma STROMAL\_CONNECTIVE  
 0.9465 Digestive Duodenum Mæ GI\_DUODENUM  
 1.0000 ENCODE2012 NHLF Lung Fil LUNG  
 1.0000 ENCODE2012 HUVEC Umbil VASCULAR  
 1.0000 Heart Aorta VASCULAR  
 0.8900 Thymus Thymus THYMUS  
 0.8797 ESC ES-UCSF4 Cel ESC

|        |               |                             |
|--------|---------------|-----------------------------|
| 1.0000 | ES-deriv      | hESC Derived ESC_DERIVED    |
| 0.8044 | Digestive     | Duodenum M GI_DUODENUM      |
| 0.9976 | Muscle        | Skeletal Musc MUSCLE        |
| 0.9952 | Blood & T-cel | Primary T CD4 BLOOD         |
| 0.7837 | IMR90         | IMR90 fetal lu LUNG         |
| 1.0000 | Brain         | Fetal Brain Fe BRAIN        |
| 0.9893 | iPSC          | iPS-18 Cells IPSC           |
| 1.0000 | Other         | Placenta Amr PLACENTA       |
| 1.0000 | Blood & T-cel | Primary T cell BLOOD        |
| 0.9556 | HSC & B-cell  | Primary B cell BLOOD        |
| 0.9425 | Digestive     | Fetal Intestin GI_INTESTINE |
| 1.0000 | Other         | Ovary OVARY                 |
| 0.8786 | Digestive     | Fetal Intestin GI_INTESTINE |
| 1.0000 | Neurosph      | Ganglion Emi BRAIN          |
| 0.9565 | ES-deriv      | H9 Derived N ESC_DERIVED    |
| 0.8102 | Myosat        | Muscle Satell MUSCLE        |
| 1.0000 | Digestive     | Fetal Intestin GI_INTESTINE |
| 1.0000 | Other         | Liver LIVER                 |
| 1.0000 | ENCODE2012    | GM12878 Lyr BLOOD           |
| 0.8694 | Epithelial    | Foreskin Kera SKIN          |
| 1.0000 | Muscle        | Psoas Muscle MUSCLE         |
| 0.7337 | Digestive     | Small Intestin GI_INTESTINE |
| 1.0000 | Brain         | Brain Hippocæ BRAIN         |
| 0.9397 | iPSC          | iPS DF 19.11 (IPSC          |
| 1.0000 | HSC & B-cell  | Primary hemæ BLOOD          |
| 0.7366 | ENCODE2012    | HMEC Mamr BREAST            |
| 0.7690 | iPSC          | iPS DF 6.9 Cel IPSC         |
| 0.9463 | Thymus        | Fetal Thymus THYMUS         |
| 0.8214 | ESC           | H1 Cells ESC                |
| 0.9966 | ESC           | ES-UCSF4 Cel ESC            |
| 1.0000 | Blood & T-cel | Primary T cell BLOOD        |
| 0.9633 | Other         | Fetal Adrenal ADRENAL       |
| 0.7366 | ES-deriv      | H9 Derived N ESC_DERIVED    |
| 0.7709 | Digestive     | Stomach Muc GI_STOMACH      |
| 1.0000 | ESC           | ES-I3 Cells ESC             |
| 0.9937 | Heart         | Fetal Heart HEART           |
| 0.9105 | ESC           | HUES6 Cells ESC             |
| 0.9310 | Epithelial    | Foreskin Fibr SKIN          |
| 0.8471 | Brain         | Brain Angular BRAIN         |
| 0.9836 | ENCODE2012    | GM12878 Lyr BLOOD           |
| 0.9028 | Blood & T-cel | Primary T hel BLOOD         |
| 0.7391 | Blood & T-cel | Primary T hel BLOOD         |
| 0.8497 | ES-deriv      | hESC Derived ESC_DERIVED    |

1.0000 Digestive Rectal Mucos GI\_RECTUM  
 0.9961 Brain Brain Inferior BRAIN  
 1.0000 Mesench Mesenchyma STROMAL\_CONNECTIVE  
 0.9272 ENCODE2012 Monocytes-C BLOOD  
 1.0000 Sm. Muscle Rectal Smoot GI\_RECTUM  
 0.8041 Epithelial Breast varian BREAST  
 1.0000 ES-deriv H1 BMP4 Der ESC\_DERIVED  
 0.9893 ENCODE2012 HepG2 Hepat LIVER  
 0.9836 ESC HUES48 Cells ESC  
 0.7414 Brain Brain Substar BRAIN  
 0.7448 Epithelial Breast varian BREAST  
 0.9450 Brain Brain Germin BRAIN  
 0.9452 Neurosph Cortex derive BRAIN  
 1.0000 Other Lung LUNG  
 0.9591 Brain Brain Germin BRAIN  
 1.0000 Sm. Muscle Colon Smoot GI\_COLON  
 0.7784 Epithelial Foreskin Fibr SKIN  
 0.8988 iPSC iPS DF 19.11 (IPSC  
 0.9533 Muscle Fetal Muscle MUSCLE  
 1.0000 ESC ES-UCSF4 Cel ESC  
 1.0000 iPSC iPS DF 6.9 Cel IPSC  
 1.0000 Mesench Mesenchyma FAT  
 0.9953 HSC & B-cell Primary Natu BLOOD  
 1.0000 ESC HUES48 Cells ESC  
 1.0000 ES-deriv H9 Derived N ESC\_DERIVED  
 0.7473 ES-deriv hESC Derived ESC\_DERIVED  
 1.0000 Brain Brain Cingula BRAIN  
 1.0000 Mesench Bone Marrow STROMAL\_CONNECTIVE  
 1.0000 Muscle Skeletal Musc MUSCLE  
 1.0000 ENCODE2012 Monocytes-C BLOOD  
 0.9664 Other Liver LIVER  
 0.8826 ESC ES-13 Cells ESC  
 0.8446 HSC & B-cell Primary mon BLOOD  
 0.9988 ES-deriv H9 Derived N ESC\_DERIVED  
 0.9498 Digestive Sigmoid Color GI\_COLON  
 1.0000 Heart Aorta VASCULAR  
 1.0000 Brain Brain Germin BRAIN  
 1.0000 Epithelial Foreskin Kera SKIN  
 0.9441 Muscle Fetal Muscle MUSCLE\_LEG  
 0.8986 ES-deriv hESC Derived ESC\_DERIVED  
 1.0000 ENCODE2012 Osteoblast Pr BONE  
 1.0000 ESC ES-UCSF4 Cel ESC  
 1.0000 Brain Brain Inferior BRAIN



|        |                |                |             |
|--------|----------------|----------------|-------------|
| 0.7573 | Epithelial     | Foreskin Fibro | SKIN        |
| 1.0000 | ESC            | H9 Cells       | ESC         |
| 1.0000 | Thymus         | Thymus         | THYMUS      |
| 0.8764 | Blood & T-cell | Primary mono   | BLOOD       |
| 0.8259 | Digestive      | Rectal Mucosa  | GI_RECTUM   |
| 0.8266 | Muscle         | Psoas Muscle   | MUSCLE      |
| 1.0000 | Epithelial     | Breast Myoepi  | BREAST      |
| 1.0000 | HSC & B-cell   | Primary Natu   | BLOOD       |
| 0.7968 | ESC            | HUES64 Cells   | ESC         |
| 0.7596 | Blood & T-cell | Primary T reg  | BLOOD       |
| 0.9937 | Other          | Fetal Lung     | LUNG        |
| 1.0000 | iPSC           | iPS-15b Cells  | IPSC        |
| 0.9533 | Sm. Muscle     | Duodenum Sr    | GI_DUODENUM |
| 1.0000 | Epithelial     | Foreskin Kera  | SKIN        |
| 0.8600 | Epithelial     | Foreskin Mel   | SKIN        |
| 0.9961 | IMR90          | IMR90 fetal l  | LUNG        |
| 1.0000 | Digestive      | Fetal Stomach  | GI_STOMACH  |
| 0.9203 | Epithelial     | Breast Myoepi  | BREAST      |
| 0.9619 | ENCODE2012     | HSMM cell de   | MUSCLE      |
| 0.8615 | Heart          | Left Ventricle | HEART       |
| 0.8005 | iPSC           | iPS-15b Cells  | IPSC        |
| 0.9105 | iPSC           | iPS-20b Cells  | IPSC        |
| 1.0000 | iPSC           | iPS-18 Cells   | IPSC        |
| 0.9706 | Blood & T-cell | Primary T hel  | BLOOD       |
| 1.0000 | Sm. Muscle     | Duodenum Sr    | GI_DUODENUM |
| 1.0000 | Digestive      | Colonic Mucosa | GI_COLON    |
| 1.0000 | Mesench        | Mesenchyma     | FAT         |
| 1.0000 | Other          | Placenta Amr   | PLACENTA    |
| 0.9803 | ESC            | HUES64 Cells   | ESC         |
| 1.0000 | Digestive      | Duodenum IV    | GI_DUODENUM |
| 0.7673 | Brain          | Fetal Brain M  | BRAIN       |
| 1.0000 | iPSC           | iPS-15b Cells  | IPSC        |
| 0.9004 | Sm. Muscle     | Rectal Smooth  | GI_RECTUM   |
| 1.0000 | Digestive      | Sigmoid Colon  | GI_COLON    |
| 1.0000 | ES-deriv       | H1 BMP4 Der    | ESC_DERIVED |
| 0.9450 | Epithelial     | Breast varian  | BREAST      |
| 1.0000 | ENCODE2012     | NHEK-Epiderr   | SKIN        |
| 0.9270 | Blood & T-cell | Primary T hel  | BLOOD       |
| 0.8712 | HSC & B-cell   | Primary hem    | BLOOD       |
| 1.0000 | ENCODE2012     | HMEC Mamr      | BREAST      |
| 0.8917 | iPSC           | iPS-15b Cells  | IPSC        |
| 1.0000 | ENCODE2012     | A549 EtOH O.   | LUNG        |
| 0.9208 | Neurosph       | Cortex derive  | BRAIN       |

0.9593 HSC & B-cell Primary monc BLOOD  
 0.9870 Epithelial Foreskin Melc SKIN  
 0.9770 Other Fetal Kidney KIDNEY  
 1.0000 Epithelial Foreskin Fibr SKIN  
 1.0000 Digestive Stomach Muc GI\_STOMACH  
 1.0000 Blood & T-cel Primary T reg BLOOD  
 0.9623 ES-deriv H9 Derived N ESC\_DERIVED  
 1.0000 Blood & T-cel Primary T hel BLOOD  
 0.7754 Other Placenta Amr PLACENTA  
 0.7756 Myosat Muscle Satell MUSCLE  
 0.9351 Digestive Fetal Intestin GI\_INTESTINE  
 1.0000 Thymus Fetal Thymus THYMUS  
 1.0000 ESC H1 Cells ESC  
 0.8979 ENCODE2012 A549 EtOH 0. LUNG  
 1.0000 ESC H9 Cells ESC  
 0.8802 HSC & B-cell Primary hemc BLOOD  
 0.8809 ENCODE2012 HSMM cell de MUSCLE  
 1.0000 Heart Left Ventricle HEART  
 0.9374 Digestive Fetal Stomach GI\_STOMACH  
 1.0000 Heart Right Ventricle HEART  
 1.0000 Epithelial Foreskin Melc SKIN  
 1.0000 HSC & B-cell Primary hemc BLOOD  
 0.8590 Epithelial Foreskin Kera SKIN  
 0.8600 ENCODE2012 A549 EtOH 0. LUNG  
 0.8247 Blood & T-cel Primary T hel BLOOD  
 1.0000 ESC ES-13 Cells ESC  
 1.0000 Brain Fetal Brain Fe BRAIN  
 0.9790 Other Placenta PLACENTA  
 0.9044 HSC & B-cell Primary neut BLOOD  
 1.0000 Heart Fetal Heart HEART  
 0.8862 ENCODE2012 HSMM Skelet MUSCLE  
 1.0000 HSC & B-cell Primary B cell BLOOD  
 1.0000 Brain Fetal Brain M BRAIN  
 0.9966 Muscle Fetal Muscle MUSCLE  
 0.7859 Muscle Fetal Muscle MUSCLE\_LEG  
 1.0000 Brain Fetal Brain M BRAIN  
 0.9966 ES-deriv hESC Derived ESC\_DERIVED  
 1.0000 Other Pancreas PANCREAS  
 0.8904 Brain Fetal Brain Fe BRAIN  
 0.9230 Blood & T-cel Primary T CD8 BLOOD  
 0.8326 Blood & T-cel Primary T hel BLOOD  
 1.0000 Epithelial Foreskin Kera SKIN  
 1.0000 ESC HUES6 Cells ESC

1.0000 ESC H1 Cells ESC  
 0.9517 HSC & B-cell Primary hemꜰ BLOOD  
 1.0000 iPSC iPS DF 6.9 Cel IPSC  
 1.0000 Blood & T-cel Primary T hel BLOOD  
 0.8738 ESC ES-WA7 Cells ESC  
 1.0000 ES-deriv H1 BMP4 Der ESC\_DERIVED  
 0.7951 Brain Fetal Brain M BRAIN  
 1.0000 HSC & B-cell Primary B cell BLOOD  
 0.7966 Digestive Fetal Stomac GI\_STOMACH  
 1.0000 ESC HUES64 Cells ESC  
 1.0000 ES-deriv H1 Derived N ESC\_DERIVED  
 0.8796 Digestive Duodenum M GI\_DUODENUM  
 1.0000 HSC & B-cell Primary hemꜰ BLOOD  
 0.9036 Brain Brain Substar BRAIN  
 0.9870 Digestive Rectal Mucos GI\_RECTUM  
 0.8819 ESC ES-UCSF4 Cel ESC  
 1.0000 ES-deriv hESC Derived ESC\_DERIVED  
 1.0000 Sm. Muscle Rectal Smoot GI\_RECTUM  
 0.8827 Blood & T-cel Primary monꜰ BLOOD  
 0.8832 ENCODE2012 Monocytes-C BLOOD  
 0.8040 Muscle Psoas Muscle MUSCLE  
 0.8041 Blood & T-cel Primary T hel BLOOD  
 0.8041 Thymus Fetal Thymus THYMUS  
 1.0000 Digestive Esophagus GI\_ESOPHAGUS  
 1.0000 Blood & T-cel Primary T hel BLOOD  
 0.9099 Brain Brain Cingulaꜰ BRAIN  
 1.0000 ESC H1 Cells ESC  
 0.9782 HSC & B-cell Primary hemꜰ BLOOD  
 1.0000 Blood & T-cel Primary T hel BLOOD  
 1.0000 ES-deriv H1 BMP4 Der ESC\_DERIVED  
 0.9270 Digestive Colonic Muco GI\_COLON  
 1.0000 ENCODE2012 HepG2 Hepat LIVER  
 0.9278 ES-deriv hESC Derived ESC\_DERIVED  
 0.9300 HSC & B-cell Primary hemꜰ BLOOD  
 1.0000 ENCODE2012 HepG2 Hepat LIVER  
 1.0000 Blood & T-cel Primary T cell BLOOD  
 0.9966 ESC ES-I3 Cells ESC  
 0.9174 Digestive Duodenum M GI\_DUODENUM  
 0.9773 Heart Left Ventricle HEART  
 0.9976 Epithelial Foreskin Fibrꜰ SKIN  
 0.9212 HSC & B-cell Primary B cell BLOOD  
 1.0000 Mesench Mesenchyma STROMAL\_CONNECTIVE  
 0.8739 ENCODE2012 HSMM Skelet MUSCLE

1.0000 ENCODE2012 GM12878 Lyr BLOOD  
 1.0000 ESC HUES6 Cells ESC  
 1.0000 ES-deriv H1 Derived N ESC\_DERIVED  
 1.0000 Blood & T-cel Primary mon BLOOD  
 1.0000 ENCODE2012 NHDF-Ad Ad SKIN  
 0.9589 Digestive Fetal Intestin GI\_INTESTINE  
 0.9441 Muscle Skeletal Musc MUSCLE  
 1.0000 ENCODE2012 HeLa-S3 Cervi CERVIX  
 1.0000 Blood & T-cel Primary T hel BLOOD  
 0.8347 Digestive Small Intestin GI\_INTESTINE  
 0.8350 ENCODE2012 HSMM cell de MUSCLE  
 1.0000 ESC HUES6 Cells ESC  
 0.9789 ENCODE2012 K562 Leukem BLOOD  
 1.0000 Sm. Muscle Colon Smooth GI\_COLON  
 0.8841 ENCODE2012 Osteoblast Pr BONE  
 1.0000 ENCODE2012 HMEC Mamr BREAST  
 1.0000 iPSC iPS-15b Cells IPSC  
 0.8841 Thymus Fetal Thymus THYMUS  
 0.8414 Epithelial Foreskin Mel SKIN  
 0.8412 Blood & T-cel Primary T cell BLOOD  
 1.0000 Brain Brain Substar BRAIN  
 0.9558 Digestive Rectal Mucos GI\_RECTUM  
 1.0000 Thymus Fetal Thymus THYMUS  
 0.9201 Thymus Thymus THYMUS  
 0.9212 Digestive Colonic Muco GI\_COLON  
 0.8531 ES-deriv H9 Derived N ESC\_DERIVED  
 1.0000 Blood & T-cel Primary T hel BLOOD  
 0.9227 ESC HUES6 Cells ESC  
 0.9611 Other Lung LUNG  
 0.9893 Other Pancreatic Isl PANCREAS  
 1.0000 Adipose Adipose Nucl FAT  
 1.0000 Digestive Gastric GI\_STOMACH  
 1.0000 Neurosph Cortex derive BRAIN  
 1.0000 Thymus Fetal Thymus THYMUS  
 0.9267 Blood & T-cel Primary T hel BLOOD  
 0.8590 ENCODE2012 HepG2 Hepat LIVER  
 0.9270 Brain Fetal Brain Fe BRAIN  
 0.9270 Digestive Colonic Muco GI\_COLON  
 0.9009 ENCODE2012 HMEC Mamr BREAST  
 0.9272 ENCODE2012 NHEK-Epiderr SKIN  
 0.9272 ENCODE2012 NHEK-Epiderr SKIN  
 1.0000 HSC & B-cell Primary hem BLOOD  
 1.0000 Brain Fetal Brain M BRAIN

1.0000 Epithelial Foreskin Mel; SKIN  
 0.8633 HSC & B-cell Primary Natu BLOOD  
 1.0000 ENCODE2012 NHLF Lung Fil LUNG  
 1.0000 HSC & B-cell Primary Natu BLOOD  
 0.8656 Other Fetal Adrenal ADRENAL  
 0.8687 Neurosph Cortex derive BRAIN  
 0.8721 ENCODE2012 HUVEC Umbil VASCULAR  
 0.9976 Sm. Muscle Stomach Smo GI\_STOMACH  
 1.0000 Blood & T-cel Primary monc BLOOD  
 1.0000 Brain Brain\_Dorsol; BRAIN  
 1.0000 ESC ES-I3 Cells ESC  
 0.8778 ENCODE2012 K562 Leukem BLOOD  
 1.0000 ES-deriv hESC Derived ESC\_DERIVED  
 0.9668 IMR90 IMR90 fetal l; LUNG  
 1.0000 Heart Right Ventricl HEART  
 0.8826 ENCODE2012 HepG2 Hepat LIVER  
 1.0000 ES-deriv hESC Derived ESC\_DERIVED  
 1.0000 ENCODE2012 HepG2 Hepat LIVER  
 0.8859 Blood & T-cel Primary T cell BLOOD  
 1.0000 Other Pancreas PANCREAS  
 0.8877 ENCODE2012 GM12878 Lyr BLOOD  
 1.0000 ESC HUES48 Cells ESC  
 0.9266 Epithelial Foreskin Mel; SKIN  
 1.0000 Adipose Adipose Nucl; FAT  
 0.8905 Digestive Rectal Mucos GI\_RECTUM  
 0.9272 ES-deriv hESC Derived ESC\_DERIVED  
 1.0000 ENCODE2012 K562 Leukem BLOOD  
 1.0000 iPSC iPS-18 Cells IPSC  
 1.0000 Sm. Muscle Rectal Smoot GI\_RECTUM  
 0.9278 ENCODE2012 HUVEC Umbil VASCULAR  
 1.0000 Blood & T-cel Primary T cell BLOOD  
 1.0000 Digestive Stomach Muc GI\_STOMACH  
 0.9310 ENCODE2012 NHLF Lung Fil LUNG  
 0.8979 Adipose Adipose Nucl; FAT  
 0.9387 Digestive Fetal Intestin; GI\_INTESTINE  
 1.0000 ESC H1 Cells ESC  
 1.0000 Neurosph Ganglion Emi BRAIN  
 0.9413 Epithelial Foreskin Kera SKIN  
 0.9687 Sm. Muscle Stomach Smo GI\_STOMACH  
 1.0000 Thymus Thymus THYMUS  
 0.9893 ENCODE2012 NHEK-Epiderr SKIN  
 1.0000 ES-deriv H9 Derived N ESC\_DERIVED  
 0.9441 Blood & T-cel Primary monc BLOOD

1.0000 HSC & B-cell Primary hemæ BLOOD  
 0.9458 Heart Left Ventricle HEART  
 1.0000 ENCODE2012 HepG2 Hepat LIVER  
 0.9129 Mesench Mesenchyma STROMAL\_CONNECTIVE  
 0.9801 Brain Brain Hippocæ BRAIN  
 1.0000 iPSC iPS DF 19.11 (IPSC  
 1.0000 ES-deriv hESC Derived ESC\_DERIVED  
 1.0000 iPSC iPS-15b Cells IPSC  
 1.0000 HSC & B-cell Primary B cell BLOOD  
 0.9556 ENCODE2012 Osteoblast Pr BONE  
 1.0000 Other Pancreas PANCREAS  
 1.0000 ESC ES-UCSF4 Cel ESC  
 0.9230 HSC & B-cell Primary Natu BLOOD  
 1.0000 ESC H1 Cells ESC  
 0.9856 Blood & T-cel Primary T reg BLOOD  
 0.9602 ENCODE2012 K562 Leukem BLOOD  
 1.0000 Brain Brain Anterio BRAIN  
 0.9874 iPSC iPS-18 Cells IPSC  
 1.0000 Adipose Adipose Nucl FAT  
 0.9880 Epithelial Breast Myoeç BREAST  
 1.0000 Epithelial Foreskin Kera SKIN  
 1.0000 HSC & B-cell Primary hemæ BLOOD  
 1.0000 ES-deriv hESC Derived ESC\_DERIVED  
 1.0000 Blood & T-cel Primary T hel BLOOD  
 0.9937 Muscle Psoas Muscle MUSCLE  
 1.0000 Blood & T-cel Primary T hel BLOOD  
 0.9340 Mesench Mesenchyma FAT  
 1.0000 Blood & T-cel Primary T hel BLOOD  
 0.9351 Epithelial Foreskin Kera SKIN  
 1.0000 Brain Fetal Brain Fe BRAIN  
 0.9381 Mesench Mesenchyma FAT  
 1.0000 Neurosph Cortex derive BRAIN  
 1.0000 Sm. Muscle Duodenum Sr GI\_DUODENUM  
 1.0000 Mesench Bone Marrow STROMAL\_CONNECTIVE  
 0.9805 Neurosph Ganglion Emi BRAIN  
 0.9987 Epithelial Foreskin Fibrc SKIN  
 0.9987 Other Ovary OVARY  
 0.9434 ENCODE2012 HepG2 Hepat LIVER  
 1.0000 Epithelial Foreskin Kera SKIN  
 0.9805 ESC ES-I3 Cells ESC  
 0.9990 ENCODE2012 GM12878 Lyr BLOOD  
 1.0000 Mesench Bone Marrow STROMAL\_CONNECTIVE  
 1.0000 ENCODE2012 HepG2 Hepat LIVER

0.9506 Digestive Rectal Mucos GI\_RECTUM  
 0.9524 Digestive Stomach Muc GI\_STOMACH  
 0.9529 Mesench Adipose Deriv FAT  
 1.0000 ENCODE2012 GM12878 Lyr BLOOD  
 0.9546 Epithelial Foreskin Mel SKIN  
 1.0000 Blood & T-cell Primary T CD8 BLOOD  
 1.0000 Blood & T-cell Primary T hel BLOOD  
 1.0000 Brain Brain Angular BRAIN  
 0.9620 Digestive Sigmoid Color GI\_COLON  
 1.0000 Epithelial Foreskin Kera SKIN  
 1.0000 iPSC iPS-20b Cells IPSC  
 1.0000 Digestive Fetal Intestin GI\_INTESTINE  
 1.0000 Sm. Muscle Colon Smooth GI\_COLON  
 1.0000 Sm. Muscle Colon Smooth GI\_COLON  
 1.0000 ENCODE2012 GM12878 Lyr BLOOD  
 1.0000 iPSC iPS-20b Cells IPSC  
 1.0000 Brain Brain Germin BRAIN  
 1.0000 Mesench Mesenchyma STROMAL\_CONNECTIVE  
 1.0000 Thymus Thymus THYMUS  
 1.0000 Brain Brain Inferior BRAIN  
 1.0000 Sm. Muscle Rectal Smooth GI\_RECTUM  
 1.0000 ENCODE2012 NHDF-Ad Ad SKIN  
 1.0000 iPSC iPS DF 6.9 Cell IPSC  
 1.0000 iPSC iPS-18 Cells IPSC  
 0.9826 Thymus Thymus THYMUS  
 1.0000 ENCODE2012 GM12878 Lyr BLOOD  
 1.0000 ENCODE2012 Dnd41 TCell L BLOOD  
 1.0000 ENCODE2012 A549 EtOH 0. LUNG  
 1.0000 ESC ES-UCSF4 Cell ESC  
 0.9874 Blood & T-cell Primary T hel BLOOD  
 0.9880 ES-deriv H9 Derived N ESC\_DERIVED  
 1.0000 ENCODE2012 HeLa-S3 Cervi CERVIX  
 1.0000 Digestive Duodenum M GI\_DUODENUM  
 1.0000 HSC & B-cell Primary hem BLOOD  
 1.0000 ES-deriv H9 Derived N ESC\_DERIVED  
 1.0000 Brain Brain Anterio BRAIN  
 1.0000 ESC HUES64 Cells ESC  
 1.0000 ENCODE2012 A549 EtOH 0. LUNG  
 0.9937 Blood & T-cell Primary T cell BLOOD  
 1.0000 ESC HUES64 Cells ESC  
 0.9952 Other Pancreas PANCREAS  
 1.0000 Neurosph Ganglion Emi BRAIN  
 0.9954 Digestive Esophagus GI\_ESOPHAGUS

1.0000 ESC HUES64 Cells ESC  
 1.0000 Sm. Muscle Stomach Smo GI\_STOMACH  
 1.0000 Muscle Skeletal Musc MUSCLE  
 0.9988 Heart Aorta VASCULAR  
 1.0000 Blood & T-cel Primary T hel BLOOD  
 1.0000 Other Pancreatic Isl PANCREAS  
 1.0000 Neurosph Cortex derive BRAIN  
 1.0000 iPSC iPS-20b Cells IPSC  
 1.0000 Heart Right Ventricl HEART  
 1.0000 Blood & T-cel Primary T CD8 BLOOD  
 1.0000 Sm. Muscle Duodenum Sr GI\_DUODENUM  
 1.0000 iPSC iPS-15b Cells IPSC  
 1.0000 Brain Fetal Brain Fe BRAIN  
 1.0000 iPSC iPS DF 6.9 Cel IPSC  
 1.0000 Sm. Muscle Colon Smooth GI\_COLON  
 1.0000 ENCODE2012 K562 Leukem BLOOD  
 1.0000 Brain Brain Angular BRAIN  
 1.0000 Brain Brain Inferior BRAIN  
 1.0000 ENCODE2012 HeLa-S3 Cervi CERVIX  
 1.0000 Brain Brain\_Dorsol: BRAIN  
 1.0000 Heart Fetal Heart HEART  
 1.0000 Epithelial Foreskin Kera SKIN  
 1.0000 ES-deriv H1 BMP4 Der ESC\_DERIVED  
 1.0000 ESC ES-WA7 Cells ESC  
 1.0000 ENCODE2012 Dnd41 TCell L BLOOD  
 1.0000 ESC HUES48 Cells ESC  
 1.0000 Neurosph Ganglion Emi BRAIN  
 1.0000 Blood & T-cel Primary T hel BLOOD  
 1.0000 Brain Brain Germin BRAIN  
 1.0000 Brain Brain Cingula: BRAIN  
 1.0000 Epithelial Foreskin Kera SKIN  
 1.0000 Digestive Duodenum IV GI\_DUODENUM  
 1.0000 ESC H9 Cells ESC  
 1.0000 Blood & T-cel Primary T cell BLOOD  
 1.0000 Blood & T-cel Primary T cell BLOOD  
 1.0000 ES-deriv H9 Derived N ESC\_DERIVED



| GWAS p-value | Roadmap EID | Roadmap Type | Marker Count | Enrichment Score | Proportion | p-value |
|--------------|-------------|--------------|--------------|------------------|------------|---------|
| 1.00E-05     | E082        | H3K4me1_En   | 21           | 2.4863           | 0.2211     | 0.0000  |
| 1.00E-05     | E088        | H3K4me3_Pr   | 9            | 2.3770           | 0.0947     | 0.0047  |
| 1.00E-05     | E113        | H3K4me1_En   | 27           | 2.1450           | 0.2842     | 0.0000  |
| 1.00E-05     | E002        | H3K4me1_En   | 15           | 2.1009           | 0.1579     | 0.0019  |
| 1.00E-05     | E045        | H3K4me1_En   | 15           | 2.0685           | 0.1579     | 0.0022  |
| 1.00E-05     | E081        | H3K4me1_En   | 20           | 2.0532           | 0.2105     | 0.0005  |
| 1.00E-05     | E073        | H3K4me3_Pr   | 9            | 2.0526           | 0.0947     | 0.0124  |
| 1.00E-05     | E070        | H3K4me1_En   | 12           | 2.0461           | 0.1263     | 0.0056  |
| 1.00E-04     | E104        | H3K27ac_Enr  | 104          | 2.0431           | 0.0997     | 0.0000  |
| 1.00E-04     | E113        | H3K27ac_Enr  | 140          | 2.0231           | 0.1342     | 0.0000  |
| 1.00E-05     | E048        | H3K4me1_En   | 17           | 2.0154           | 0.1789     | 0.0016  |
| 1.00E-05     | E079        | H3K4me1_En   | 19           | 2.0028           | 0.2000     | 0.0010  |
| 1.00E-05     | E008        | H3K9ac_Pro   | 9            | 1.9629           | 0.0947     | 0.0165  |
| 1.00E-05     | E094        | H3K4me1_En   | 18           | 1.9514           | 0.1895     | 0.0018  |
| 1.00E-05     | E043        | H3K27ac_Enr  | 9            | 1.9118           | 0.0947     | 0.0194  |
| 1.00E-05     | E044        | H3K4me1_En   | 15           | 1.9092           | 0.1579     | 0.0048  |
| 1.00E-05     | E008        | H3K27ac_Enr  | 11           | 1.8970           | 0.1158     | 0.0130  |
| 1.00E-05     | E104        | H3K4me1_En   | 17           | 1.8798           | 0.1789     | 0.0035  |
| 1.00E-05     | E103        | H3K4me1_En   | 13           | 1.8631           | 0.1368     | 0.0095  |
| 1.00E-05     | E039        | H3K4me1_En   | 17           | 1.8398           | 0.1789     | 0.0044  |
| 1.00E-05     | E082        | H3K4me3_Pr   | 4            | 1.8337           | 0.0421     | 0.0682  |
| 1.00E-05     | E038        | H3K4me1_En   | 15           | 1.8277           | 0.1579     | 0.0073  |
| 1.00E-04     | E066        | H3K27ac_Enr  | 142          | 1.8248           | 0.1361     | 0.0000  |
| 1.00E-05     | E007        | H3K9ac_Pro   | 18           | 1.8065           | 0.1895     | 0.0043  |
| 1.00E-05     | E042        | H3K4me1_En   | 15           | 1.7961           | 0.1579     | 0.0086  |
| 1.00E-04     | E096        | H3K27ac_Enr  | 140          | 1.7809           | 0.1342     | 0.0000  |
| 1.00E-05     | E034        | H3K4me1_En   | 16           | 1.7611           | 0.1684     | 0.0084  |
| 1.00E-05     | E041        | H3K4me1_En   | 18           | 1.7561           | 0.1895     | 0.0058  |
| 1.00E-05     | E040        | H3K4me1_En   | 15           | 1.7496           | 0.1579     | 0.0108  |
| 1.00E-05     | E112        | H3K4me1_En   | 9            | 1.7359           | 0.0947     | 0.0346  |
| 1.00E-05     | E105        | H3K4me1_En   | 22           | 1.7224           | 0.2316     | 0.0033  |
| 1.00E-05     | E059        | H3K27ac_Enr  | 9            | 1.7216           | 0.0947     | 0.0363  |
| 1.00E-05     | E111        | H3K4me3_Pr   | 8            | 1.7108           | 0.0842     | 0.0446  |
| 1.00E-05     | E037        | H3K4me1_En   | 15           | 1.6954           | 0.1579     | 0.0143  |
| 1.00E-05     | E047        | H3K4me1_En   | 15           | 1.6631           | 0.1579     | 0.0169  |
| 1.00E-05     | E056        | H3K27ac_Enr  | 20           | 1.6541           | 0.2105     | 0.0077  |
| 1.00E-05     | E122        | H3K4me1_En   | 10           | 1.6312           | 0.1053     | 0.0425  |
| 1.00E-05     | E111        | H3K9ac_Pro   | 7            | 1.6282           | 0.0737     | 0.0664  |
| 1.00E-05     | E076        | H3K27ac_Enr  | 13           | 1.6163           | 0.1368     | 0.0291  |
| 1.00E-05     | E043        | H3K4me1_En   | 15           | 1.6071           | 0.1579     | 0.0226  |
| 1.00E-04     | E059        | H3K4me1_En   | 111          | 1.5942           | 0.1064     | 0.0000  |
| 1.00E-04     | E095        | H3K27ac_Enr  | 102          | 1.5900           | 0.0978     | 0.0000  |

|          |      |             |     |        |        |        |
|----------|------|-------------|-----|--------|--------|--------|
| 1.00E-04 | E059 | H3K27ac_Enr | 91  | 1.5855 | 0.0872 | 0.0000 |
| 1.00E-04 | E055 | H3K4me3_Pr  | 86  | 1.5772 | 0.0825 | 0.0000 |
| 1.00E-05 | E027 | H3K9ac_Pro  | 15  | 1.5759 | 0.1579 | 0.0266 |
| 1.00E-05 | E016 | H3K9ac_Pro  | 7   | 1.5718 | 0.0737 | 0.0779 |
| 1.00E-05 | E093 | H3K4me1_En  | 16  | 1.5703 | 0.1684 | 0.0239 |
| 1.00E-05 | E006 | H3K4me3_Pr  | 7   | 1.5658 | 0.0737 | 0.0792 |
| 1.00E-05 | E093 | H3K27ac_Enr | 8   | 1.5645 | 0.0842 | 0.0702 |
| 1.00E-05 | E089 | H3K4me1_En  | 19  | 1.5608 | 0.2000 | 0.0166 |
| 1.00E-04 | E097 | H3K27ac_Enr | 80  | 1.5528 | 0.0767 | 0.0001 |
| 1.00E-04 | E065 | H3K27ac_Enr | 68  | 1.5508 | 0.0652 | 0.0002 |
| 1.00E-05 | E075 | H3K9ac_Pro  | 8   | 1.5491 | 0.0842 | 0.0737 |
| 1.00E-04 | E104 | H3K4me1_En  | 152 | 1.5309 | 0.1457 | 0.0000 |
| 1.00E-05 | E055 | H3K27ac_Enr | 18  | 1.5291 | 0.1895 | 0.0232 |
| 1.00E-04 | E100 | H3K27ac_Enr | 79  | 1.5229 | 0.0757 | 0.0001 |
| 1.00E-05 | E092 | H3K27ac_Enr | 9   | 1.5171 | 0.0947 | 0.0728 |
| 1.00E-04 | E086 | H3K4me1_En  | 76  | 1.5154 | 0.0729 | 0.0002 |
| 1.00E-04 | E005 | H3K4me3_Pr  | 64  | 1.4989 | 0.0614 | 0.0007 |
| 1.00E-04 | E056 | H3K4me3_Pr  | 113 | 1.4982 | 0.1083 | 0.0000 |
| 1.00E-05 | E118 | H3K4me3_Pr  | 4   | 1.4978 | 0.0421 | 0.1299 |
| 1.00E-05 | E083 | H3K9ac_Pro  | 12  | 1.4950 | 0.1263 | 0.0566 |
| 1.00E-04 | E105 | H3K4me1_En  | 208 | 1.4833 | 0.1994 | 0.0000 |
| 1.00E-05 | E115 | H3K27ac_Enr | 8   | 1.4766 | 0.0842 | 0.0926 |
| 1.00E-04 | E029 | H3K27ac_Enr | 52  | 1.4734 | 0.0499 | 0.0027 |
| 1.00E-04 | E113 | H3K4me3_Pr  | 175 | 1.4636 | 0.1678 | 0.0000 |
| 1.00E-05 | E075 | H3K4me1_En  | 14  | 1.4627 | 0.1474 | 0.0531 |
| 1.00E-05 | E100 | H3K4me1_En  | 11  | 1.4621 | 0.1158 | 0.0722 |
| 1.00E-05 | E063 | H3K27ac_Enr | 12  | 1.4607 | 0.1263 | 0.0657 |
| 1.00E-05 | E125 | H3K4me3_Pr  | 5   | 1.4601 | 0.0526 | 0.1288 |
| 1.00E-04 | E073 | H3K4me3_Pr  | 70  | 1.4541 | 0.0671 | 0.0009 |
| 1.00E-04 | E105 | H3K27ac_Enr | 133 | 1.4526 | 0.1275 | 0.0000 |
| 1.00E-04 | E080 | H3K4me1_En  | 160 | 1.4486 | 0.1534 | 0.0000 |
| 1.00E-05 | E092 | H3K4me1_En  | 18  | 1.4471 | 0.1895 | 0.0382 |
| 1.00E-04 | E087 | H3K27ac_Enr | 49  | 1.4380 | 0.0470 | 0.0054 |
| 1.00E-04 | E080 | H3K27ac_Enr | 121 | 1.4350 | 0.1160 | 0.0000 |
| 1.00E-05 | E055 | H3K4me1_En  | 21  | 1.4347 | 0.2211 | 0.0303 |
| 1.00E-04 | E100 | H3K4me1_En  | 118 | 1.4286 | 0.1131 | 0.0000 |
| 1.00E-04 | E108 | H3K27ac_Enr | 114 | 1.4257 | 0.1093 | 0.0001 |
| 1.00E-04 | E066 | H3K9ac_Pro  | 93  | 1.4236 | 0.0892 | 0.0003 |
| 1.00E-05 | E027 | H3K4me3_Pr  | 4   | 1.4084 | 0.0421 | 0.1558 |
| 1.00E-04 | E109 | H3K27ac_Enr | 102 | 1.4050 | 0.0978 | 0.0003 |
| 1.00E-04 | E073 | H3K27ac_Enr | 178 | 1.4040 | 0.1707 | 0.0000 |
| 1.00E-04 | E113 | H3K4me1_En  | 194 | 1.4038 | 0.1860 | 0.0000 |
| 1.00E-04 | E034 | H3K4me1_En  | 140 | 1.4036 | 0.1342 | 0.0000 |

|          |      |             |     |        |        |        |
|----------|------|-------------|-----|--------|--------|--------|
| 1.00E-05 | E083 | H3K4me1_En  | 15  | 1.3968 | 0.1579 | 0.0671 |
| 1.00E-04 | E098 | H3K27ac_Enf | 62  | 1.3894 | 0.0594 | 0.0046 |
| 1.00E-05 | E063 | H3K4me1_En  | 17  | 1.3849 | 0.1789 | 0.0604 |
| 1.00E-04 | E072 | H3K4me1_En  | 116 | 1.3770 | 0.1112 | 0.0002 |
| 1.00E-04 | E096 | H3K4me1_En  | 167 | 1.3762 | 0.1601 | 0.0000 |
| 1.00E-05 | E053 | H3K4me1_En  | 12  | 1.3741 | 0.1263 | 0.0952 |
| 1.00E-05 | E125 | H3K4me1_En  | 14  | 1.3717 | 0.1474 | 0.0825 |
| 1.00E-04 | E030 | H3K4me1_En  | 93  | 1.3650 | 0.0892 | 0.0012 |
| 1.00E-05 | E076 | H3K4me3_Pr  | 7   | 1.3636 | 0.0737 | 0.1419 |
| 1.00E-04 | E047 | H3K4me1_En  | 135 | 1.3633 | 0.1294 | 0.0001 |
| 1.00E-05 | E111 | H3K4me1_En  | 14  | 1.3513 | 0.1474 | 0.0911 |
| 1.00E-05 | E101 | H3K4me1_En  | 13  | 1.3457 | 0.1368 | 0.1003 |
| 1.00E-05 | E047 | H3K9ac_Pro  | 7   | 1.3448 | 0.0737 | 0.1499 |
| 1.00E-05 | E118 | H3K9ac_Pro  | 4   | 1.3437 | 0.0421 | 0.1781 |
| 1.00E-04 | E065 | H3K4me1_En  | 96  | 1.3436 | 0.0920 | 0.0016 |
| 1.00E-05 | E088 | H3K9ac_Pro  | 8   | 1.3403 | 0.0842 | 0.1428 |
| 1.00E-04 | E075 | H3K27ac_Enf | 102 | 1.3395 | 0.0978 | 0.0013 |
| 1.00E-04 | E038 | H3K4me1_En  | 120 | 1.3318 | 0.1151 | 0.0007 |
| 1.00E-04 | E039 | H3K4me1_En  | 135 | 1.3307 | 0.1294 | 0.0003 |
| 1.00E-04 | E096 | H3K4me3_Pr  | 53  | 1.3253 | 0.0508 | 0.0179 |
| 1.00E-04 | E062 | H3K9ac_Pro  | 116 | 1.3241 | 0.1112 | 0.0010 |
| 1.00E-05 | E068 | H3K4me1_En  | 17  | 1.3203 | 0.1789 | 0.0870 |
| 1.00E-05 | E102 | H3K4me1_En  | 13  | 1.3199 | 0.1368 | 0.1127 |
| 1.00E-04 | E067 | H3K9ac_Pro  | 104 | 1.3179 | 0.0997 | 0.0020 |
| 1.00E-04 | E124 | H3K4me1_En  | 121 | 1.3178 | 0.1160 | 0.0009 |
| 1.00E-04 | E043 | H3K4me1_En  | 135 | 1.3175 | 0.1294 | 0.0005 |
| 1.00E-04 | E073 | H3K4me1_En  | 170 | 1.3171 | 0.1630 | 0.0001 |
| 1.00E-04 | E011 | H3K9ac_Pro  | 48  | 1.3156 | 0.0460 | 0.0253 |
| 1.00E-04 | E111 | H3K9ac_Pro  | 62  | 1.3135 | 0.0594 | 0.0140 |
| 1.00E-05 | E011 | H3K27ac_Enf | 12  | 1.3103 | 0.1263 | 0.1249 |
| 1.00E-04 | E091 | H3K27ac_Enf | 87  | 1.3093 | 0.0834 | 0.0051 |
| 1.00E-05 | E043 | H3K4me3_Pr  | 4   | 1.3081 | 0.0421 | 0.1919 |
| 1.00E-05 | E077 | H3K4me1_En  | 15  | 1.3071 | 0.1579 | 0.1059 |
| 1.00E-04 | E006 | H3K4me3_Pr  | 64  | 1.3039 | 0.0614 | 0.0148 |
| 1.00E-05 | E075 | H3K27ac_Enf | 9   | 1.2976 | 0.0947 | 0.1551 |
| 1.00E-04 | E097 | H3K4me1_En  | 122 | 1.2974 | 0.1170 | 0.0015 |
| 1.00E-05 | E067 | H3K4me1_En  | 15  | 1.2959 | 0.1579 | 0.1120 |
| 1.00E-04 | E108 | H3K4me1_En  | 177 | 1.2933 | 0.1697 | 0.0002 |
| 1.00E-04 | E069 | H3K9ac_Pro  | 74  | 1.2931 | 0.0709 | 0.0116 |
| 1.00E-05 | E080 | H3K4me1_En  | 13  | 1.2922 | 0.1368 | 0.1276 |
| 1.00E-04 | E083 | H3K4me1_En  | 152 | 1.2892 | 0.1457 | 0.0005 |
| 1.00E-05 | E102 | H3K4me3_Pr  | 5   | 1.2880 | 0.0526 | 0.1931 |
| 1.00E-04 | E069 | H3K4me1_En  | 165 | 1.2873 | 0.1582 | 0.0003 |

|          |      |             |      |        |        |        |
|----------|------|-------------|------|--------|--------|--------|
| 1.00E-04 | E059 | H3K4me3_Pr  | 48   | 1.2873 | 0.0460 | 0.0348 |
| 1.00E-04 | E079 | H3K4me1_En  | 134  | 1.2866 | 0.1285 | 0.0012 |
| 1.00E-04 | E073 | H3K9ac_Pro  | 67   | 1.2850 | 0.0642 | 0.0173 |
| 1.00E-04 | E091 | H3K4me1_En  | 128  | 1.2842 | 0.1227 | 0.0017 |
| 1.00E-04 | E045 | H3K4me1_En  | 102  | 1.2812 | 0.0978 | 0.0049 |
| 1.00E-04 | E041 | H3K4me1_En  | 144  | 1.2796 | 0.1381 | 0.0010 |
| 1.00E-05 | E077 | H3K4me3_Pr  | 6    | 1.2777 | 0.0632 | 0.1903 |
| 1.00E-04 | E069 | H3K4me3_Pr  | 60   | 1.2773 | 0.0575 | 0.0251 |
| 1.00E-04 | E067 | H3K4me3_Pr  | 55   | 1.2740 | 0.0527 | 0.0314 |
| 1.00E-04 | E083 | H3K9ac_Pro  | 112  | 1.2710 | 0.1074 | 0.0043 |
| 1.00E-05 | E128 | H3K4me1_En  | 8    | 1.2693 | 0.0842 | 0.1788 |
| 1.00E-05 | E113 | H3K27ac_Enf | 8    | 1.2692 | 0.0842 | 0.1789 |
| 1.00E-04 | E125 | H3K4me1_En  | 142  | 1.2672 | 0.1361 | 0.0016 |
| 1.00E-04 | E094 | H3K4me1_En  | 128  | 1.2639 | 0.1227 | 0.0029 |
| 0.01     | E016 | H3K4me3_Pr  | 4103 | 1.2635 | 0.0432 | 0.0000 |
| 1.00E-04 | E115 | H3K27ac_Enf | 75   | 1.2609 | 0.0719 | 0.0189 |
| 1.00E-04 | E071 | H3K4me3_Pr  | 69   | 1.2568 | 0.0662 | 0.0246 |
| 1.00E-04 | E106 | H3K27ac_Enf | 89   | 1.2537 | 0.0853 | 0.0136 |
| 1.00E-04 | E127 | H3K4me3_Pr  | 50   | 1.2484 | 0.0479 | 0.0501 |
| 1.00E-04 | E115 | H3K4me1_En  | 81   | 1.2475 | 0.0777 | 0.0194 |
| 1.00E-05 | E068 | H3K4me3_Pr  | 6    | 1.2473 | 0.0632 | 0.2062 |
| 1.00E-04 | E083 | H3K4me3_Pr  | 88   | 1.2452 | 0.0844 | 0.0164 |
| 1.00E-04 | E092 | H3K4me1_En  | 170  | 1.2448 | 0.1630 | 0.0012 |
| 1.00E-04 | E049 | H3K4me3_Pr  | 50   | 1.2440 | 0.0479 | 0.0526 |
| 1.00E-04 | E115 | H3K4me3_Pr  | 32   | 1.2406 | 0.0307 | 0.0941 |
| 1.00E-04 | E095 | H3K4me1_En  | 128  | 1.2404 | 0.1227 | 0.0054 |
| 1.00E-04 | E063 | H3K4me1_En  | 167  | 1.2392 | 0.1601 | 0.0017 |
| 1.00E-05 | E027 | H3K4me1_En  | 17   | 1.2374 | 0.1789 | 0.1373 |
| 1.00E-04 | E072 | H3K27ac_Enf | 160  | 1.2347 | 0.1534 | 0.0024 |
| 1.00E-04 | E089 | H3K4me1_En  | 165  | 1.2346 | 0.1582 | 0.0020 |
| 1.00E-04 | E122 | H3K4me1_En  | 83   | 1.2331 | 0.0796 | 0.0234 |
| 1.00E-05 | E054 | H3K4me3_Pr  | 3    | 1.2315 | 0.0316 | 0.2273 |
| 1.00E-04 | E050 | H3K4me1_En  | 133  | 1.2307 | 0.1275 | 0.0060 |
| 1.00E-04 | E072 | H3K9ac_Pro  | 109  | 1.2299 | 0.1045 | 0.0120 |
| 0.01     | E014 | H3K4me3_Pr  | 5281 | 1.2275 | 0.0556 | 0.0000 |
| 1.00E-04 | E051 | H3K4me1_En  | 108  | 1.2272 | 0.1035 | 0.0130 |
| 1.00E-04 | E022 | H3K4me1_En  | 133  | 1.2243 | 0.1275 | 0.0070 |
| 1.00E-04 | E056 | H3K27ac_Enf | 162  | 1.2204 | 0.1553 | 0.0035 |
| 1.00E-05 | E028 | H3K4me3_Pr  | 3    | 1.2185 | 0.0316 | 0.2328 |
| 1.00E-04 | E075 | H3K4me1_En  | 128  | 1.2181 | 0.1227 | 0.0094 |
| 1.00E-04 | E124 | H3K27ac_Enf | 130  | 1.2149 | 0.1246 | 0.0097 |
| 1.00E-04 | E111 | H3K4me1_En  | 138  | 1.2132 | 0.1323 | 0.0082 |
| 1.00E-04 | E002 | H3K4me1_En  | 95   | 1.2119 | 0.0911 | 0.0248 |

|          |      |             |      |        |        |        |
|----------|------|-------------|------|--------|--------|--------|
| 1.00E-05 | E126 | H3K4me1_En  | 8    | 1.2110 | 0.0842 | 0.2149 |
| 1.00E-04 | E048 | H3K4me1_En  | 112  | 1.2094 | 0.1074 | 0.0172 |
| 1.00E-04 | E129 | H3K4me1_En  | 131  | 1.2087 | 0.1256 | 0.0110 |
| 1.00E-05 | E055 | H3K4me3_Pr  | 6    | 1.2081 | 0.0632 | 0.2288 |
| 1.00E-05 | E105 | H3K4me3_Pr  | 3    | 1.2068 | 0.0316 | 0.2379 |
| 1.00E-04 | E044 | H3K27ac_Enf | 67   | 1.2065 | 0.0642 | 0.0527 |
| 1.00E-04 | E120 | H3K4me3_Pr  | 27   | 1.2039 | 0.0259 | 0.1403 |
| 1.00E-05 | E103 | H3K27ac_Enf | 7    | 1.2036 | 0.0737 | 0.2260 |
| 1.00E-04 | E120 | H3K9ac_Pro  | 30   | 1.1989 | 0.0288 | 0.1349 |
| 1.00E-04 | E089 | H3K27ac_Enf | 75   | 1.1980 | 0.0719 | 0.0495 |
| 1.00E-04 | E107 | H3K4me3_Pr  | 45   | 1.1955 | 0.0431 | 0.0987 |
| 1.00E-05 | E109 | H3K4me1_En  | 12   | 1.1922 | 0.1263 | 0.2040 |
| 1.00E-05 | E118 | H3K27ac_Enf | 4    | 1.1922 | 0.0421 | 0.2453 |
| 1.00E-04 | E055 | H3K27ac_Enf | 154  | 1.1916 | 0.1477 | 0.0101 |
| 1.00E-04 | E038 | H3K27ac_Enf | 46   | 1.1905 | 0.0441 | 0.1012 |
| 1.00E-04 | E108 | H3K4me3_Pr  | 56   | 1.1905 | 0.0537 | 0.0820 |
| 1.00E-04 | E052 | H3K4me1_En  | 126  | 1.1871 | 0.1208 | 0.0205 |
| 1.00E-04 | E063 | H3K27ac_Enf | 107  | 1.1863 | 0.1026 | 0.0308 |
| 1.00E-05 | E115 | H3K4me1_En  | 7    | 1.1836 | 0.0737 | 0.2394 |
| 1.00E-04 | E092 | H3K27ac_Enf | 77   | 1.1822 | 0.0738 | 0.0597 |
| 1.00E-05 | E084 | H3K4me1_En  | 12   | 1.1816 | 0.1263 | 0.2129 |
| 1.00E-04 | E029 | H3K4me1_En  | 87   | 1.1814 | 0.0834 | 0.0498 |
| 1.00E-04 | E066 | H3K4me1_En  | 129  | 1.1812 | 0.1237 | 0.0221 |
| 1.00E-04 | E067 | H3K4me1_En  | 150  | 1.1804 | 0.1438 | 0.0148 |
| 1.00E-04 | E027 | H3K4me1_En  | 178  | 1.1801 | 0.1707 | 0.0085 |
| 1.00E-05 | E059 | H3K4me3_Pr  | 4    | 1.1777 | 0.0421 | 0.2531 |
| 1.00E-04 | E067 | H3K27ac_Enf | 134  | 1.1768 | 0.1285 | 0.0222 |
| 0.01     | E063 | H3K4me3_Pr  | 5272 | 1.1766 | 0.0555 | 0.0000 |
| 1.00E-04 | E107 | H3K9ac_Pro  | 100  | 1.1750 | 0.0959 | 0.0435 |
| 0.01     | E020 | H3K4me3_Pr  | 5730 | 1.1743 | 0.0603 | 0.0000 |
| 1.00E-05 | E102 | H3K9ac_Pro  | 6    | 1.1741 | 0.0632 | 0.2504 |
| 1.00E-04 | E046 | H3K4me1_En  | 99   | 1.1738 | 0.0949 | 0.0452 |
| 0.01     | E019 | H3K4me3_Pr  | 4552 | 1.1731 | 0.0479 | 0.0000 |
| 1.00E-05 | E007 | H3K4me1_En  | 10   | 1.1720 | 0.1053 | 0.2323 |
| 1.00E-04 | E049 | H3K9ac_Pro  | 78   | 1.1683 | 0.0748 | 0.0715 |
| 1.00E-04 | E005 | H3K4me1_En  | 130  | 1.1635 | 0.1246 | 0.0323 |
| 1.00E-05 | E008 | H3K4me3_Pr  | 3    | 1.1605 | 0.0316 | 0.2595 |
| 1.00E-04 | E049 | H3K27ac_Enf | 88   | 1.1598 | 0.0844 | 0.0687 |
| 1.00E-04 | E018 | H3K9ac_Pro  | 86   | 1.1555 | 0.0825 | 0.0757 |
| 1.00E-04 | E035 | H3K4me1_En  | 62   | 1.1550 | 0.0594 | 0.1100 |
| 1.00E-04 | E082 | H3K4me1_En  | 107  | 1.1539 | 0.1026 | 0.0565 |
| 1.00E-04 | E037 | H3K4me1_En  | 112  | 1.1530 | 0.1074 | 0.0532 |
| 1.00E-05 | E069 | H3K9ac_Pro  | 6    | 1.1511 | 0.0632 | 0.2660 |

|          |      |             |      |        |        |        |
|----------|------|-------------|------|--------|--------|--------|
| 1.00E-04 | E077 | H3K4me1_En  | 145  | 1.1509 | 0.1390 | 0.0339 |
| 1.00E-04 | E044 | H3K4me1_En  | 99   | 1.1477 | 0.0949 | 0.0706 |
| 1.00E-04 | E061 | H3K4me1_En  | 158  | 1.1472 | 0.1515 | 0.0306 |
| 0.001    | E029 | H3K27ac_Enf | 361  | 1.1451 | 0.0387 | 0.0047 |
| 1.00E-04 | E055 | H3K4me1_En  | 184  | 1.1450 | 0.1764 | 0.0221 |
| 1.00E-04 | E006 | H3K4me1_En  | 130  | 1.1438 | 0.1246 | 0.0492 |
| 1.00E-04 | E121 | H3K27ac_Enf | 70   | 1.1421 | 0.0671 | 0.1141 |
| 1.00E-04 | E107 | H3K4me1_En  | 112  | 1.1417 | 0.1074 | 0.0655 |
| 1.00E-04 | E017 | H3K4me1_En  | 128  | 1.1409 | 0.1227 | 0.0537 |
| 0.01     | E078 | H3K4me3_Pri | 5891 | 1.1389 | 0.0620 | 0.0000 |
| 1.00E-04 | E090 | H3K27ac_Enf | 73   | 1.1387 | 0.0700 | 0.1144 |
| 1.00E-05 | E052 | H3K4me1_En  | 11   | 1.1378 | 0.1158 | 0.2580 |
| 1.00E-04 | E052 | H3K4me3_Pri | 43   | 1.1375 | 0.0412 | 0.1717 |
| 0.01     | E066 | H3K4me3_Pri | 5364 | 1.1372 | 0.0565 | 0.0000 |
| 1.00E-05 | E038 | H3K27ac_Enf | 4    | 1.1366 | 0.0421 | 0.2764 |
| 1.00E-05 | E063 | H3K9ac_Pro  | 9    | 1.1363 | 0.0947 | 0.2676 |
| 1.00E-04 | E124 | H3K9ac_Pro  | 79   | 1.1337 | 0.0757 | 0.1132 |
| 1.00E-04 | E023 | H3K9ac_Pro  | 89   | 1.1318 | 0.0853 | 0.1030 |
| 1.00E-05 | E019 | H3K9ac_Pro  | 5    | 1.1302 | 0.0526 | 0.2818 |
| 0.001    | E066 | H3K27ac_Enf | 785  | 1.1293 | 0.0843 | 0.0002 |
| 1.00E-04 | E056 | H3K4me1_En  | 194  | 1.1283 | 0.1860 | 0.0314 |
| 0.001    | E030 | H3K4me3_Pri | 293  | 1.1253 | 0.0314 | 0.0201 |
| 0.01     | E012 | H3K4me3_Pri | 2690 | 1.1253 | 0.0283 | 0.0000 |
| 0.001    | E032 | H3K4me3_Pri | 184  | 1.1250 | 0.0197 | 0.0513 |
| 1.00E-05 | E084 | H3K27ac_Enf | 6    | 1.1247 | 0.0632 | 0.2852 |
| 1.00E-04 | E007 | H3K9ac_Pro  | 123  | 1.1244 | 0.1179 | 0.0789 |
| 1.00E-05 | E120 | H3K27ac_Enf | 4    | 1.1237 | 0.0421 | 0.2842 |
| 1.00E-05 | E108 | H3K4me1_En  | 14   | 1.1231 | 0.1474 | 0.2606 |
| 1.00E-05 | E121 | H3K4me1_En  | 12   | 1.1217 | 0.1263 | 0.2701 |
| 1.00E-05 | E076 | H3K4me1_En  | 11   | 1.1208 | 0.1158 | 0.2748 |
| 1.00E-05 | E012 | H3K4me1_En  | 15   | 1.1167 | 0.1579 | 0.2641 |
| 1.00E-04 | E121 | H3K9ac_Pro  | 62   | 1.1167 | 0.0594 | 0.1674 |
| 1.00E-04 | E062 | H3K27ac_Enf | 30   | 1.1166 | 0.0288 | 0.2340 |
| 1.00E-05 | E061 | H3K4me1_En  | 14   | 1.1160 | 0.1474 | 0.2688 |
| 0.01     | E071 | H3K4me3_Pri | 5579 | 1.1157 | 0.0587 | 0.0000 |
| 1.00E-04 | E078 | H3K4me1_En  | 132  | 1.1156 | 0.1266 | 0.0848 |
| 1.00E-04 | E040 | H3K4me1_En  | 105  | 1.1155 | 0.1007 | 0.1108 |
| 1.00E-05 | E120 | H3K4me1_En  | 8    | 1.1155 | 0.0842 | 0.2891 |
| 1.00E-04 | E032 | H3K27ac_Enf | 43   | 1.1149 | 0.0412 | 0.2066 |
| 0.01     | E102 | H3K4me3_Pri | 4324 | 1.1139 | 0.0455 | 0.0000 |
| 0.001    | E071 | H3K4me3_Pri | 546  | 1.1133 | 0.0586 | 0.0052 |
| 1.00E-04 | E081 | H3K4me1_En  | 119  | 1.1127 | 0.1141 | 0.1014 |
| 1.00E-04 | E128 | H3K4me1_En  | 77   | 1.1127 | 0.0738 | 0.1510 |

|          |      |             |      |        |        |        |
|----------|------|-------------|------|--------|--------|--------|
| 1.00E-04 | E098 | H3K4me1_En  | 127  | 1.1120 | 0.1218 | 0.0953 |
| 0.01     | E083 | H3K4me3_Pr  | 7156 | 1.1118 | 0.0753 | 0.0000 |
| 1.00E-04 | E032 | H3K4me1_En  | 98   | 1.1116 | 0.0940 | 0.1258 |
| 1.00E-04 | E051 | H3K4me3_Pr  | 45   | 1.1112 | 0.0431 | 0.2086 |
| 1.00E-04 | E068 | H3K4me1_En  | 157  | 1.1106 | 0.1505 | 0.0737 |
| 0.01     | E077 | H3K4me3_Pr  | 5210 | 1.1095 | 0.0548 | 0.0000 |
| 0.01     | E091 | H3K4me3_Pr  | 1601 | 1.1084 | 0.0169 | 0.0000 |
| 1.00E-05 | E013 | H3K27ac_Enf | 10   | 1.1084 | 0.1053 | 0.2906 |
| 0.01     | E100 | H3K4me3_Pr  | 2168 | 1.1052 | 0.0228 | 0.0000 |
| 0.01     | E097 | H3K4me3_Pr  | 2099 | 1.1052 | 0.0221 | 0.0000 |
| 1.00E-05 | E012 | H3K27ac_Enf | 10   | 1.1049 | 0.1053 | 0.2941 |
| 1.00E-05 | E085 | H3K4me1_En  | 12   | 1.1032 | 0.1263 | 0.2902 |
| 1.00E-04 | E090 | H3K4me1_En  | 136  | 1.1028 | 0.1304 | 0.1045 |
| 1.00E-04 | E007 | H3K4me3_Pr  | 45   | 1.1020 | 0.0431 | 0.2249 |
| 1.00E-05 | E113 | H3K4me3_Pr  | 12   | 1.1018 | 0.1263 | 0.2918 |
| 1.00E-05 | E085 | H3K27ac_Enf | 6    | 1.1006 | 0.0632 | 0.3037 |
| 1.00E-04 | E023 | H3K4me3_Pr  | 67   | 1.0996 | 0.0642 | 0.1916 |
| 0.01     | E104 | H3K4me3_Pr  | 2291 | 1.0991 | 0.0241 | 0.0000 |
| 0.001    | E113 | H3K27ac_Enf | 679  | 1.0984 | 0.0729 | 0.0058 |
| 1.00E-05 | E026 | H3K4me1_En  | 11   | 1.0984 | 0.1158 | 0.2983 |
| 0.001    | E030 | H3K4me1_En  | 668  | 1.0976 | 0.0717 | 0.0066 |
| 1.00E-05 | E125 | H3K27ac_Enf | 6    | 1.0969 | 0.0632 | 0.3067 |
| 0.01     | E098 | H3K4me3_Pr  | 2458 | 1.0968 | 0.0259 | 0.0000 |
| 0.01     | E105 | H3K4me3_Pr  | 2725 | 1.0963 | 0.0287 | 0.0000 |
| 0.001    | E066 | H3K4me3_Pr  | 507  | 1.0959 | 0.0544 | 0.0172 |
| 0.01     | E072 | H3K4me3_Pr  | 4930 | 1.0935 | 0.0519 | 0.0000 |
| 1.00E-04 | E074 | H3K27ac_Enf | 113  | 1.0935 | 0.1083 | 0.1465 |
| 1.00E-04 | E063 | H3K9ac_Pro  | 95   | 1.0924 | 0.0911 | 0.1690 |
| 0.001    | E088 | H3K4me3_Pr  | 405  | 1.0907 | 0.0435 | 0.0366 |
| 1.00E-04 | E042 | H3K4me1_En  | 100  | 1.0906 | 0.0959 | 0.1673 |
| 0.001    | E091 | H3K27ac_Enf | 646  | 1.0884 | 0.0693 | 0.0131 |
| 0.01     | E004 | H3K4me3_Pr  | 1279 | 1.0883 | 0.0135 | 0.0012 |
| 1.00E-04 | E071 | H3K27ac_Enf | 120  | 1.0874 | 0.1151 | 0.1537 |
| 0.001    | E104 | H3K27ac_Enf | 494  | 1.0864 | 0.0530 | 0.0290 |
| 1.00E-04 | E049 | H3K4me1_En  | 135  | 1.0857 | 0.1294 | 0.1435 |
| 0.01     | E065 | H3K4me3_Pr  | 1700 | 1.0853 | 0.0179 | 0.0004 |
| 0.01     | E025 | H3K4me3_Pr  | 5889 | 1.0849 | 0.0620 | 0.0000 |
| 1.00E-04 | E031 | H3K4me1_En  | 66   | 1.0840 | 0.0633 | 0.2266 |
| 1.00E-04 | E036 | H3K4me1_En  | 98   | 1.0827 | 0.0940 | 0.1889 |
| 0.01     | E108 | H3K4me3_Pr  | 4635 | 1.0819 | 0.0488 | 0.0000 |
| 0.01     | E124 | H3K4me3_Pr  | 5068 | 1.0813 | 0.0534 | 0.0000 |
| 1.00E-05 | E101 | H3K4me3_Pr  | 5    | 1.0806 | 0.0526 | 0.3173 |
| 0.01     | E011 | H3K4me3_Pr  | 9751 | 1.0803 | 0.1027 | 0.0000 |

|          |      |            |      |        |        |        |
|----------|------|------------|------|--------|--------|--------|
| 0.01     | E023 | H3K4me3_Pr | 5994 | 1.0801 | 0.0631 | 0.0000 |
| 1.00E-05 | E008 | H3K4me1_En | 5    | 1.0800 | 0.0526 | 0.3177 |
| 1.00E-04 | E120 | H3K4me1_En | 85   | 1.0795 | 0.0815 | 0.2122 |
| 1.00E-04 | E102 | H3K4me3_Pr | 46   | 1.0793 | 0.0441 | 0.2670 |
| 0.01     | E089 | H3K4me3_Pr | 1652 | 1.0787 | 0.0174 | 0.0010 |
| 1.00E-04 | E122 | H3K9ac_Pro | 35   | 1.0779 | 0.0336 | 0.2879 |
| 1.00E-05 | E110 | H3K9ac_Pro | 7    | 1.0771 | 0.0737 | 0.3244 |
| 1.00E-04 | E076 | H3K4me1_En | 116  | 1.0766 | 0.1112 | 0.1859 |
| 1.00E-05 | E017 | H3K4me1_En | 11   | 1.0765 | 0.1158 | 0.3229 |
| 0.001    | E067 | H3K4me3_Pr | 415  | 1.0761 | 0.0445 | 0.0615 |
| 1.00E-05 | E065 | H3K4me1_En | 7    | 1.0756 | 0.0737 | 0.3257 |
| 0.01     | E017 | H3K4me3_Pr | 1729 | 1.0755 | 0.0182 | 0.0012 |
| 0.01     | E015 | H3K4me3_Pr | 3827 | 1.0745 | 0.0403 | 0.0000 |
| 0.001    | E086 | H3K4me1_En | 481  | 1.0737 | 0.0516 | 0.0536 |
| 0.01     | E095 | H3K4me3_Pr | 1737 | 1.0731 | 0.0183 | 0.0016 |
| 0.01     | E005 | H3K4me3_Pr | 4172 | 1.0729 | 0.0439 | 0.0000 |
| 1.00E-04 | E008 | H3K9ac_Pro | 54   | 1.0727 | 0.0518 | 0.2693 |
| 1.00E-05 | E052 | H3K9ac_Pro | 5    | 1.0720 | 0.0526 | 0.3238 |
| 1.00E-05 | E110 | H3K4me1_En | 13   | 1.0719 | 0.1368 | 0.3253 |
| 1.00E-04 | E027 | H3K9ac_Pro | 112  | 1.0717 | 0.1074 | 0.2036 |
| 1.00E-04 | E071 | H3K4me1_En | 163  | 1.0690 | 0.1563 | 0.1668 |
| 0.01     | E069 | H3K4me3_Pr | 4573 | 1.0689 | 0.0481 | 0.0000 |
| 0.01     | E075 | H3K4me3_Pr | 4104 | 1.0687 | 0.0432 | 0.0000 |
| 0.01     | E090 | H3K4me3_Pr | 1751 | 1.0685 | 0.0184 | 0.0027 |
| 0.01     | E117 | H3K9ac_Pro | 4931 | 1.0683 | 0.0519 | 0.0000 |
| 1.00E-05 | E090 | H3K4me1_En | 12   | 1.0683 | 0.1263 | 0.3314 |
| 0.01     | E006 | H3K4me3_Pr | 4773 | 1.0677 | 0.0502 | 0.0000 |
| 0.01     | E009 | H3K4me3_Pr | 1966 | 1.0675 | 0.0207 | 0.0018 |
| 0.001    | E069 | H3K4me3_Pr | 447  | 1.0653 | 0.0480 | 0.0828 |
| 1.00E-04 | E114 | H3K4me1_En | 123  | 1.0648 | 0.1179 | 0.2138 |
| 1.00E-04 | E017 | H3K9ac_Pro | 52   | 1.0640 | 0.0499 | 0.2921 |
| 0.01     | E088 | H3K4me3_Pr | 4026 | 1.0634 | 0.0424 | 0.0000 |
| 0.001    | E072 | H3K4me3_Pr | 470  | 1.0629 | 0.0504 | 0.0849 |
| 0.01     | E061 | H3K4me3_Pr | 2156 | 1.0626 | 0.0227 | 0.0023 |
| 0.01     | E001 | H3K9ac_Pro | 3868 | 1.0610 | 0.0407 | 0.0001 |
| 1.00E-04 | E126 | H3K4me3_Pr | 21   | 1.0609 | 0.0201 | 0.3381 |
| 0.001    | E031 | H3K4me1_En | 577  | 1.0608 | 0.0619 | 0.0699 |
| 1.00E-04 | E013 | H3K27ac_En | 105  | 1.0601 | 0.1007 | 0.2455 |
| 0.01     | E001 | H3K4me3_Pr | 4744 | 1.0593 | 0.0499 | 0.0000 |
| 0.01     | E076 | H3K4me3_Pr | 5436 | 1.0590 | 0.0572 | 0.0000 |
| 0.01     | E003 | H3K4me3_Pr | 2167 | 1.0587 | 0.0228 | 0.0038 |
| 0.01     | E027 | H3K4me3_Pr | 3006 | 1.0585 | 0.0316 | 0.0008 |
| 0.01     | E068 | H3K4me3_Pr | 5090 | 1.0582 | 0.0536 | 0.0000 |



|          |      |             |      |        |        |        |
|----------|------|-------------|------|--------|--------|--------|
| 0.01     | E007 | H3K4me3_Pr  | 3934 | 1.0578 | 0.0414 | 0.0002 |
| 1.00E-04 | E025 | H3K4me3_Pr  | 63   | 1.0570 | 0.0604 | 0.2966 |
| 1.00E-05 | E054 | H3K4me1_En  | 8    | 1.0569 | 0.0842 | 0.3450 |
| 0.01     | E074 | H3K4me3_Pr  | 4865 | 1.0557 | 0.0512 | 0.0001 |
| 1.00E-04 | E074 | H3K9ac_Pro  | 57   | 1.0557 | 0.0547 | 0.3065 |
| 0.01     | E053 | H3K4me3_Pr  | 1955 | 1.0555 | 0.0206 | 0.0081 |
| 0.001    | E007 | H3K4me3_Pr  | 385  | 1.0554 | 0.0413 | 0.1346 |
| 0.01     | E067 | H3K4me3_Pr  | 4148 | 1.0550 | 0.0437 | 0.0002 |
| 0.01     | E033 | H3K4me3_Pr  | 2289 | 1.0549 | 0.0241 | 0.0050 |
| 1.00E-04 | E112 | H3K4me1_En  | 60   | 1.0541 | 0.0575 | 0.3074 |
| 0.01     | E092 | H3K4me3_Pr  | 1844 | 1.0529 | 0.0194 | 0.0128 |
| 0.01     | E086 | H3K9ac_Pro  | 1857 | 1.0526 | 0.0195 | 0.0129 |
| 0.01     | E013 | H3K4me3_Pr  | 2042 | 1.0526 | 0.0215 | 0.0098 |
| 0.01     | E085 | H3K4me3_Pr  | 2179 | 1.0523 | 0.0229 | 0.0081 |
| 1.00E-04 | E015 | H3K9ac_Pro  | 62   | 1.0522 | 0.0594 | 0.3104 |
| 0.01     | E037 | H3K4me3_Pr  | 3207 | 1.0507 | 0.0338 | 0.0023 |
| 0.01     | E035 | H3K4me3_Pr  | 2140 | 1.0504 | 0.0225 | 0.0108 |
| 0.01     | E120 | H3K4me3_Pr  | 2145 | 1.0501 | 0.0226 | 0.0111 |
| 0.001    | E008 | H3K27ac_Enf | 597  | 1.0498 | 0.0641 | 0.1069 |
| 1.00E-04 | E120 | H3K27ac_Enf | 41   | 1.0491 | 0.0393 | 0.3389 |
| 0.01     | E107 | H3K4me3_Pr  | 3596 | 1.0489 | 0.0379 | 0.0018 |
| 0.01     | E005 | H3K9ac_Pro  | 2852 | 1.0475 | 0.0300 | 0.0060 |
| 0.001    | E107 | H3K4me3_Pr  | 352  | 1.0469 | 0.0378 | 0.1829 |
| 0.01     | E008 | H3K4me3_Pr  | 2705 | 1.0465 | 0.0285 | 0.0084 |
| 0.01     | E087 | H3K4me3_Pr  | 1544 | 1.0462 | 0.0163 | 0.0364 |
| 0.001    | E082 | H3K4me1_En  | 865  | 1.0442 | 0.0928 | 0.0889 |
| 0.001    | E124 | H3K4me3_Pr  | 480  | 1.0442 | 0.0515 | 0.1598 |
| 0.001    | E073 | H3K4me3_Pr  | 449  | 1.0441 | 0.0482 | 0.1680 |
| 0.01     | E097 | H3K27ac_Enf | 4899 | 1.0441 | 0.0516 | 0.0010 |
| 0.01     | E123 | H3K4me3_Pr  | 2735 | 1.0439 | 0.0288 | 0.0114 |
| 0.01     | E046 | H3K4me3_Pr  | 1662 | 1.0434 | 0.0175 | 0.0401 |
| 0.01     | E119 | H3K4me3_Pr  | 1913 | 1.0428 | 0.0201 | 0.0320 |
| 1.00E-04 | E066 | H3K4me3_Pr  | 54   | 1.0427 | 0.0518 | 0.3429 |
| 0.001    | E101 | H3K4me3_Pr  | 473  | 1.0423 | 0.0508 | 0.1713 |
| 0.001    | E125 | H3K4me3_Pr  | 350  | 1.0421 | 0.0376 | 0.2069 |
| 1.00E-05 | E075 | H3K4me3_Pr  | 4    | 1.0415 | 0.0421 | 0.3394 |
| 0.01     | E117 | H3K4me3_Pr  | 4513 | 1.0411 | 0.0475 | 0.0029 |
| 1.00E-04 | E078 | H3K27ac_Enf | 64   | 1.0408 | 0.0614 | 0.3403 |
| 0.01     | E059 | H3K4me3_Pr  | 3533 | 1.0403 | 0.0372 | 0.0085 |
| 0.01     | E002 | H3K4me3_Pr  | 5258 | 1.0398 | 0.0554 | 0.0018 |
| 0.01     | E086 | H3K4me3_Pr  | 1869 | 1.0394 | 0.0197 | 0.0453 |
| 0.01     | E038 | H3K4me3_Pr  | 3321 | 1.0375 | 0.0350 | 0.0155 |
| 0.01     | E017 | H3K9ac_Pro  | 4618 | 1.0375 | 0.0486 | 0.0053 |

|          |      |             |      |        |        |        |
|----------|------|-------------|------|--------|--------|--------|
| 1.00E-04 | E026 | H3K4me1_En  | 114  | 1.0368 | 0.1093 | 0.3194 |
| 0.01     | E034 | H3K4me3_Pr  | 2064 | 1.0368 | 0.0217 | 0.0480 |
| 1.00E-04 | E085 | H3K27ac_Enf | 62   | 1.0359 | 0.0594 | 0.3557 |
| 0.01     | E054 | H3K4me3_Pr  | 2521 | 1.0349 | 0.0265 | 0.0400 |
| 0.001    | E007 | H3K9ac_Pro  | 1011 | 1.0346 | 0.1085 | 0.1234 |
| 0.01     | E094 | H3K4me3_Pr  | 4036 | 1.0344 | 0.0425 | 0.0141 |
| 0.01     | E123 | H3K9ac_Pro  | 2724 | 1.0342 | 0.0287 | 0.0373 |
| 1.00E-04 | E004 | H3K27ac_Enf | 61   | 1.0334 | 0.0585 | 0.3637 |
| 0.01     | E080 | H3K4me3_Pr  | 1662 | 1.0332 | 0.0175 | 0.0881 |
| 0.001    | E096 | H3K4me1_En  | 1120 | 1.0332 | 0.1202 | 0.1196 |
| 0.001    | E068 | H3K4me3_Pr  | 487  | 1.0323 | 0.0523 | 0.2275 |
| 0.001    | E081 | H3K4me1_En  | 986  | 1.0321 | 0.1058 | 0.1435 |
| 0.01     | E048 | H3K4me3_Pr  | 3408 | 1.0320 | 0.0359 | 0.0305 |
| 0.01     | E018 | H3K4me3_Pr  | 4070 | 1.0319 | 0.0428 | 0.0203 |
| 0.01     | E126 | H3K9ac_Pro  | 2139 | 1.0317 | 0.0225 | 0.0715 |
| 0.001    | E066 | H3K9ac_Pro  | 602  | 1.0316 | 0.0646 | 0.2083 |
| 0.01     | E047 | H3K9ac_Pro  | 5369 | 1.0316 | 0.0565 | 0.0096 |
| 0.01     | E087 | H3K9ac_Pro  | 1924 | 1.0315 | 0.0203 | 0.0837 |
| 1.00E-04 | E039 | H3K4me3_Pr  | 39   | 1.0312 | 0.0374 | 0.3815 |
| 1.00E-04 | E111 | H3K27ac_Enf | 85   | 1.0308 | 0.0815 | 0.3584 |
| 1.00E-04 | E076 | H3K27ac_Enf | 91   | 1.0305 | 0.0872 | 0.3562 |
| 0.01     | E010 | H3K4me3_Pr  | 1882 | 1.0296 | 0.0198 | 0.0989 |
| 0.01     | E123 | H3K4me1_En  | 6716 | 1.0295 | 0.0707 | 0.0068 |
| 1.00E-04 | E030 | H3K4me3_Pr  | 30   | 1.0292 | 0.0288 | 0.3892 |
| 0.01     | E093 | H3K4me3_Pr  | 2012 | 1.0289 | 0.0212 | 0.0964 |
| 0.01     | E084 | H3K4me3_Pr  | 1945 | 1.0283 | 0.0205 | 0.1054 |
| 1.00E-05 | E118 | H3K4me1_En  | 8    | 1.0274 | 0.0842 | 0.3764 |
| 0.001    | E113 | H3K4me1_En  | 1268 | 1.0272 | 0.1361 | 0.1493 |
| 0.01     | E044 | H3K27ac_Enf | 5192 | 1.0266 | 0.0547 | 0.0260 |
| 0.01     | E128 | H3K9ac_Pro  | 1993 | 1.0264 | 0.0210 | 0.1176 |
| 0.01     | E021 | H3K4me3_Pr  | 1661 | 1.0263 | 0.0175 | 0.1405 |
| 0.01     | E024 | H3K4me3_Pr  | 2853 | 1.0257 | 0.0300 | 0.0837 |
| 0.01     | E112 | H3K4me3_Pr  | 1922 | 1.0255 | 0.0202 | 0.1301 |
| 0.01     | E104 | H3K27ac_Enf | 4752 | 1.0250 | 0.0500 | 0.0401 |
| 0.01     | E115 | H3K4me3_Pr  | 2408 | 1.0250 | 0.0253 | 0.1083 |
| 0.01     | E114 | H3K4me3_Pr  | 4495 | 1.0246 | 0.0473 | 0.0471 |
| 0.01     | E079 | H3K4me3_Pr  | 2391 | 1.0242 | 0.0252 | 0.1164 |
| 0.01     | E044 | H3K4me1_En  | 8045 | 1.0241 | 0.0847 | 0.0130 |
| 0.01     | E118 | H3K4me3_Pr  | 2734 | 1.0239 | 0.0288 | 0.1041 |
| 0.01     | E058 | H3K4me3_Pr  | 2741 | 1.0238 | 0.0289 | 0.1041 |
| 0.01     | E070 | H3K4me3_Pr  | 2464 | 1.0231 | 0.0259 | 0.1239 |
| 0.01     | E039 | H3K4me3_Pr  | 3524 | 1.0230 | 0.0371 | 0.0832 |
| 0.001    | E089 | H3K4me1_En  | 1220 | 1.0219 | 0.1309 | 0.2042 |

|          |      |             |      |        |        |        |
|----------|------|-------------|------|--------|--------|--------|
| 1.00E-04 | E039 | H3K27ac_Enf | 57   | 1.0218 | 0.0547 | 0.3993 |
| 0.01     | E043 | H3K4me3_Pri | 3123 | 1.0214 | 0.0329 | 0.1128 |
| 0.01     | E040 | H3K4me3_Pri | 3982 | 1.0212 | 0.0419 | 0.0874 |
| 0.01     | E029 | H3K4me3_Pri | 1213 | 1.0210 | 0.0128 | 0.2279 |
| 0.01     | E096 | H3K4me3_Pri | 3718 | 1.0208 | 0.0391 | 0.0992 |
| 1.00E-05 | E073 | H3K4me1_En  | 12   | 1.0207 | 0.1263 | 0.3941 |
| 1.00E-04 | E087 | H3K4me1_En  | 103  | 1.0202 | 0.0988 | 0.3902 |
| 0.01     | E128 | H3K4me3_Pri | 1643 | 1.0202 | 0.0173 | 0.2034 |
| 0.01     | E103 | H3K4me3_Pri | 4521 | 1.0200 | 0.0476 | 0.0853 |
| 1.00E-04 | E129 | H3K27ac_Enf | 88   | 1.0198 | 0.0844 | 0.3964 |
| 0.01     | E055 | H3K4me3_Pri | 5063 | 1.0195 | 0.0533 | 0.0782 |
| 1.00E-04 | E069 | H3K27ac_Enf | 123  | 1.0195 | 0.1179 | 0.3869 |
| 0.01     | E042 | H3K27ac_Enf | 4185 | 1.0192 | 0.0441 | 0.1036 |
| 1.00E-04 | E093 | H3K4me1_En  | 114  | 1.0191 | 0.1093 | 0.3914 |
| 1.00E-05 | E056 | H3K4me3_Pri | 7    | 1.0189 | 0.0737 | 0.3811 |
| 0.01     | E072 | H3K9ac_Pro  | 8216 | 1.0179 | 0.0865 | 0.0465 |
| 0.01     | E101 | H3K4me3_Pri | 4709 | 1.0178 | 0.0496 | 0.1062 |
| 0.001    | E074 | H3K4me3_Pri | 460  | 1.0178 | 0.0494 | 0.3383 |
| 1.00E-04 | E062 | H3K4me1_En  | 52   | 1.0174 | 0.0499 | 0.4130 |
| 0.01     | E126 | H3K4me3_Pri | 1834 | 1.0173 | 0.0193 | 0.2251 |
| 1.00E-05 | E067 | H3K4me3_Pri | 4    | 1.0172 | 0.0421 | 0.3576 |
| 1.00E-04 | E115 | H3K9ac_Pro  | 35   | 1.0170 | 0.0336 | 0.4153 |
| 0.001    | E102 | H3K4me3_Pri | 387  | 1.0165 | 0.0415 | 0.3589 |
| 0.01     | E044 | H3K4me3_Pri | 3148 | 1.0164 | 0.0331 | 0.1736 |
| 1.00E-04 | E122 | H3K27ac_Enf | 40   | 1.0163 | 0.0384 | 0.4170 |
| 0.001    | E038 | H3K4me3_Pri | 319  | 1.0161 | 0.0342 | 0.3721 |
| 0.01     | E073 | H3K4me3_Pri | 4454 | 1.0159 | 0.0469 | 0.1391 |
| 0.01     | E017 | H3K27ac_Enf | 5530 | 1.0158 | 0.0582 | 0.1137 |
| 0.01     | E049 | H3K4me3_Pri | 3717 | 1.0154 | 0.0391 | 0.1683 |
| 0.01     | E038 | H3K9ac_Pro  | 6808 | 1.0153 | 0.0717 | 0.0957 |
| 0.01     | E123 | H3K27ac_Enf | 2835 | 1.0152 | 0.0298 | 0.2044 |
| 0.001    | E040 | H3K4me3_Pri | 388  | 1.0145 | 0.0416 | 0.3735 |
| 1.00E-05 | E122 | H3K9ac_Pro  | 3    | 1.0143 | 0.0316 | 0.3431 |
| 0.001    | E046 | H3K4me1_En  | 764  | 1.0140 | 0.0820 | 0.3354 |
| 0.001    | E045 | H3K4me1_En  | 721  | 1.0138 | 0.0774 | 0.3419 |
| 0.01     | E109 | H3K4me3_Pri | 2676 | 1.0133 | 0.0282 | 0.2401 |
| 0.001    | E032 | H3K4me1_En  | 798  | 1.0133 | 0.0856 | 0.3400 |
| 0.01     | E073 | H3K9ac_Pro  | 4811 | 1.0131 | 0.0506 | 0.1751 |
| 1.00E-05 | E129 | H3K4me1_En  | 10   | 1.0130 | 0.1053 | 0.3999 |
| 0.001    | E076 | H3K4me3_Pri | 510  | 1.0130 | 0.0547 | 0.3713 |
| 0.001    | E032 | H3K27ac_Enf | 349  | 1.0130 | 0.0375 | 0.3895 |
| 0.01     | E099 | H3K4me3_Pri | 2684 | 1.0129 | 0.0283 | 0.2466 |
| 0.01     | E111 | H3K4me3_Pri | 4736 | 1.0129 | 0.0499 | 0.1813 |

|          |      |             |       |        |        |        |
|----------|------|-------------|-------|--------|--------|--------|
| 0.01     | E117 | H3K27ac_Enf | 4714  | 1.0127 | 0.0496 | 0.1843 |
| 0.01     | E090 | H3K27ac_Enf | 5908  | 1.0119 | 0.0622 | 0.1720 |
| 0.01     | E082 | H3K4me3_Pri | 2207  | 1.0118 | 0.0232 | 0.2833 |
| 0.01     | E032 | H3K4me3_Pri | 1687  | 1.0117 | 0.0178 | 0.3094 |
| 0.01     | E080 | H3K27ac_Enf | 7769  | 1.0117 | 0.0818 | 0.1421 |
| 0.01     | E115 | H3K4me1_En  | 5981  | 1.0114 | 0.0630 | 0.1802 |
| 0.001    | E072 | H3K4me1_En  | 761   | 1.0113 | 0.0817 | 0.3648 |
| 0.001    | E034 | H3K4me1_En  | 901   | 1.0112 | 0.0967 | 0.3545 |
| 0.01     | E036 | H3K4me3_Pri | 2838  | 1.0111 | 0.0299 | 0.2714 |
| 1.00E-05 | E022 | H3K4me1_En  | 10    | 1.0107 | 0.1053 | 0.4029 |
| 1.00E-04 | E028 | H3K4me1_En  | 136   | 1.0106 | 0.1304 | 0.4249 |
| 0.01     | E100 | H3K27ac_Enf | 4774  | 1.0104 | 0.0503 | 0.2283 |
| 1.00E-04 | E126 | H3K9ac_Pro  | 23    | 1.0103 | 0.0221 | 0.4252 |
| 0.01     | E062 | H3K4me3_Pri | 2001  | 1.0103 | 0.0211 | 0.3172 |
| 0.01     | E048 | H3K27ac_Enf | 4212  | 1.0102 | 0.0443 | 0.2466 |
| 0.01     | E122 | H3K4me3_Pri | 1851  | 1.0102 | 0.0195 | 0.3240 |
| 0.001    | E096 | H3K27ac_Enf | 709   | 1.0096 | 0.0761 | 0.3858 |
| 0.01     | E051 | H3K4me3_Pri | 3720  | 1.0086 | 0.0392 | 0.2932 |
| 0.01     | E041 | H3K4me3_Pri | 3948  | 1.0084 | 0.0416 | 0.2933 |
| 0.01     | E067 | H3K9ac_Pro  | 7246  | 1.0082 | 0.0763 | 0.2326 |
| 0.01     | E081 | H3K4me1_En  | 9809  | 1.0071 | 0.1033 | 0.2281 |
| 0.01     | E052 | H3K4me3_Pri | 3467  | 1.0070 | 0.0365 | 0.3339 |
| 0.01     | E125 | H3K4me3_Pri | 3448  | 1.0070 | 0.0363 | 0.3352 |
| 0.01     | E057 | H3K4me3_Pri | 2352  | 1.0068 | 0.0248 | 0.3649 |
| 0.01     | E056 | H3K4me3_Pri | 6915  | 1.0066 | 0.0728 | 0.2817 |
| 0.01     | E110 | H3K4me3_Pri | 4002  | 1.0056 | 0.0421 | 0.3563 |
| 0.01     | E042 | H3K4me3_Pri | 3552  | 1.0051 | 0.0374 | 0.3735 |
| 0.001    | E038 | H3K4me1_En  | 809   | 1.0051 | 0.0868 | 0.4308 |
| 0.01     | E091 | H3K27ac_Enf | 6082  | 1.0050 | 0.0640 | 0.3404 |
| 0.01     | E102 | H3K27ac_Enf | 6095  | 1.0048 | 0.0642 | 0.3464 |
| 0.01     | E074 | H3K9ac_Pro  | 4941  | 1.0048 | 0.0520 | 0.3624 |
| 0.001    | E078 | H3K4me1_En  | 1062  | 1.0047 | 0.1140 | 0.4269 |
| 0.01     | E059 | H3K27ac_Enf | 5251  | 1.0046 | 0.0553 | 0.3641 |
| 1.00E-04 | E118 | H3K27ac_Enf | 37    | 1.0044 | 0.0355 | 0.4455 |
| 0.01     | E008 | H3K9ac_Pro  | 4605  | 1.0044 | 0.0485 | 0.3753 |
| 0.01     | E120 | H3K9ac_Pro  | 2289  | 1.0044 | 0.0241 | 0.4100 |
| 0.01     | E007 | H3K9ac_Pro  | 10002 | 1.0039 | 0.1053 | 0.3380 |
| 0.001    | E034 | H3K4me3_Pri | 196   | 1.0038 | 0.0210 | 0.4596 |
| 1.00E-04 | E012 | H3K4me1_En  | 148   | 1.0036 | 0.1419 | 0.4595 |
| 0.01     | E047 | H3K4me3_Pri | 2573  | 1.0036 | 0.0271 | 0.4225 |
| 0.01     | E115 | H3K27ac_Enf | 5434  | 1.0031 | 0.0572 | 0.4040 |
| 0.01     | E107 | H3K9ac_Pro  | 7775  | 1.0030 | 0.0818 | 0.3869 |
| 0.01     | E122 | H3K9ac_Pro  | 2966  | 1.0029 | 0.0312 | 0.4313 |

|          |      |             |       |        |        |        |
|----------|------|-------------|-------|--------|--------|--------|
| 1.00E-04 | E011 | H3K4me1_En  | 152   | 1.0027 | 0.1457 | 0.4642 |
| 0.001    | E009 | H3K4me3_Pr  | 181   | 1.0020 | 0.0194 | 0.4693 |
| 0.001    | E108 | H3K4me3_Pr  | 421   | 1.0019 | 0.0452 | 0.4710 |
| 0.01     | E022 | H3K4me3_Pr  | 2613  | 1.0018 | 0.0275 | 0.4581 |
| 0.01     | E106 | H3K4me3_Pr  | 3352  | 1.0013 | 0.0353 | 0.4654 |
| 0.001    | E083 | H3K4me3_Pr  | 632   | 1.0011 | 0.0678 | 0.4781 |
| 0.01     | E111 | H3K9ac_Pro  | 4302  | 1.0007 | 0.0453 | 0.4761 |
| 0.001    | E008 | H3K9ac_Pro  | 450   | 1.0007 | 0.0483 | 0.4811 |
| 0.01     | E019 | H3K9ac_Pro  | 4424  | 1.0001 | 0.0466 | 0.4939 |
| 0.001    | E039 | H3K4me1_En  | 906   | 0.9997 | 0.0972 | 0.4943 |
| 1.00E-04 | E101 | H3K4me1_En  | 106   | 0.9994 | 0.1016 | 0.4766 |
| 1.00E-04 | E088 | H3K4me1_En  | 142   | 0.9992 | 0.1361 | 0.4817 |
| 0.01     | E074 | H3K27ac_Enf | 9403  | 0.9991 | 0.0990 | 0.5355 |
| 0.01     | E113 | H3K4me3_Pr  | 10878 | 0.9989 | 0.1145 | 0.5465 |
| 1.00E-04 | E102 | H3K4me1_En  | 108   | 0.9988 | 0.1035 | 0.4798 |
| 0.001    | E011 | H3K4me3_Pr  | 884   | 0.9985 | 0.0949 | 0.5097 |
| 0.001    | E120 | H3K4me3_Pr  | 200   | 0.9983 | 0.0215 | 0.4910 |
| 0.001    | E044 | H3K4me1_En  | 769   | 0.9980 | 0.0825 | 0.5133 |
| 0.01     | E095 | H3K27ac_Enf | 5830  | 0.9979 | 0.0614 | 0.5634 |
| 0.01     | E047 | H3K27ac_Enf | 2871  | 0.9975 | 0.0302 | 0.5499 |
| 0.01     | E040 | H3K27ac_Enf | 4211  | 0.9974 | 0.0443 | 0.5638 |
| 0.01     | E067 | H3K27ac_Enf | 10339 | 0.9970 | 0.1088 | 0.6254 |
| 0.01     | E030 | H3K4me1_En  | 6186  | 0.9969 | 0.0651 | 0.5952 |
| 0.01     | E031 | H3K4me3_Pr  | 1694  | 0.9969 | 0.0178 | 0.5447 |
| 0.01     | E114 | H3K9ac_Pro  | 4187  | 0.9969 | 0.0441 | 0.5774 |
| 0.01     | E081 | H3K4me3_Pr  | 989   | 0.9968 | 0.0104 | 0.5315 |
| 0.001    | E081 | H3K4me3_Pr  | 97    | 0.9968 | 0.0104 | 0.4857 |
| 0.01     | E082 | H3K4me1_En  | 8416  | 0.9965 | 0.0886 | 0.6296 |
| 0.01     | E118 | H3K9ac_Pro  | 2966  | 0.9965 | 0.0312 | 0.5730 |
| 0.01     | E074 | H3K4me1_En  | 11390 | 0.9964 | 0.1199 | 0.6572 |
| 0.001    | E043 | H3K4me1_En  | 912   | 0.9963 | 0.0979 | 0.5377 |
| 0.01     | E089 | H3K27ac_Enf | 5680  | 0.9962 | 0.0598 | 0.6143 |
| 0.01     | E045 | H3K4me3_Pr  | 3292  | 0.9959 | 0.0347 | 0.5915 |
| 1.00E-04 | E068 | H3K9ac_Pro  | 94    | 0.9955 | 0.0901 | 0.4910 |
| 0.01     | E117 | H3K4me1_En  | 8550  | 0.9948 | 0.0900 | 0.6910 |
| 0.001    | E027 | H3K4me3_Pr  | 277   | 0.9945 | 0.0297 | 0.5215 |
| 0.01     | E108 | H3K9ac_Pro  | 6039  | 0.9941 | 0.0636 | 0.6807 |
| 0.01     | E006 | H3K9ac_Pro  | 4705  | 0.9937 | 0.0495 | 0.6674 |
| 0.01     | E121 | H3K4me3_Pr  | 3679  | 0.9937 | 0.0387 | 0.6481 |
| 0.01     | E029 | H3K27ac_Enf | 3194  | 0.9937 | 0.0336 | 0.6375 |
| 0.01     | E073 | H3K4me1_En  | 11681 | 0.9937 | 0.1230 | 0.7669 |
| 1.00E-04 | E111 | H3K4me3_Pr  | 51    | 0.9934 | 0.0489 | 0.4823 |
| 1.00E-04 | E119 | H3K4me3_Pr  | 20    | 0.9929 | 0.0192 | 0.4537 |

|          |      |             |       |        |        |        |
|----------|------|-------------|-------|--------|--------|--------|
| 0.01     | E077 | H3K9ac_Pro  | 5041  | 0.9927 | 0.0531 | 0.7009 |
| 0.01     | E050 | H3K27ac_Enf | 6664  | 0.9924 | 0.0702 | 0.7396 |
| 0.01     | E067 | H3K4me1_En  | 11484 | 0.9922 | 0.1209 | 0.8125 |
| 0.001    | E115 | H3K27ac_Enf | 527   | 0.9918 | 0.0566 | 0.5655 |
| 0.01     | E062 | H3K4me1_En  | 4615  | 0.9914 | 0.0486 | 0.7229 |
| 0.01     | E073 | H3K27ac_Enf | 11447 | 0.9914 | 0.1205 | 0.8367 |
| 0.01     | E121 | H3K9ac_Pro  | 5013  | 0.9914 | 0.0528 | 0.7332 |
| 0.01     | E086 | H3K4me1_En  | 4528  | 0.9913 | 0.0477 | 0.7230 |
| 0.01     | E108 | H3K27ac_Enf | 7218  | 0.9912 | 0.0760 | 0.7817 |
| 0.01     | E025 | H3K9ac_Pro  | 7178  | 0.9911 | 0.0756 | 0.7818 |
| 0.01     | E072 | H3K27ac_Enf | 11692 | 0.9906 | 0.1231 | 0.8606 |
| 0.001    | E006 | H3K9ac_Pro  | 460   | 0.9906 | 0.0494 | 0.5706 |
| 0.01     | E072 | H3K4me1_En  | 7600  | 0.9906 | 0.0800 | 0.8041 |
| 0.01     | E006 | H3K4me1_En  | 10249 | 0.9901 | 0.1079 | 0.8555 |
| 0.01     | E098 | H3K27ac_Enf | 4021  | 0.9894 | 0.0423 | 0.7527 |
| 0.01     | E129 | H3K4me3_Pr  | 3626  | 0.9893 | 0.0382 | 0.7419 |
| 0.01     | E050 | H3K4me3_Pr  | 2976  | 0.9892 | 0.0313 | 0.7219 |
| 0.01     | E047 | H3K4me1_En  | 8920  | 0.9891 | 0.0939 | 0.8613 |
| 0.01     | E037 | H3K27ac_Enf | 5315  | 0.9889 | 0.0560 | 0.7966 |
| 0.001    | E006 | H3K4me1_En  | 1004  | 0.9889 | 0.1078 | 0.6385 |
| 0.001    | E124 | H3K4me1_En  | 811   | 0.9888 | 0.0870 | 0.6231 |
| 0.01     | E129 | H3K4me1_En  | 9760  | 0.9888 | 0.1027 | 0.8798 |
| 0.01     | E045 | H3K4me1_En  | 7169  | 0.9887 | 0.0755 | 0.8399 |
| 1.00E-05 | E121 | H3K9ac_Pro  | 5     | 0.9887 | 0.0526 | 0.3943 |
| 0.01     | E109 | H3K27ac_Enf | 6536  | 0.9885 | 0.0688 | 0.8314 |
| 1.00E-05 | E044 | H3K27ac_Enf | 5     | 0.9885 | 0.0526 | 0.3945 |
| 0.001    | E098 | H3K27ac_Enf | 394   | 0.9884 | 0.0423 | 0.5807 |
| 0.01     | E105 | H3K4me1_En  | 12621 | 0.9882 | 0.1329 | 0.9235 |
| 0.01     | E026 | H3K4me3_Pr  | 3649  | 0.9881 | 0.0384 | 0.7662 |
| 0.01     | E088 | H3K9ac_Pro  | 5897  | 0.9880 | 0.0621 | 0.8287 |
| 0.01     | E075 | H3K9ac_Pro  | 5101  | 0.9878 | 0.0537 | 0.8136 |
| 0.01     | E038 | H3K27ac_Enf | 3475  | 0.9875 | 0.0366 | 0.7722 |
| 1.00E-04 | E068 | H3K27ac_Enf | 121   | 0.9873 | 0.1160 | 0.5355 |
| 0.01     | E008 | H3K27ac_Enf | 5724  | 0.9872 | 0.0603 | 0.8408 |
| 0.001    | E098 | H3K4me3_Pr  | 217   | 0.9872 | 0.0233 | 0.5587 |
| 0.01     | E023 | H3K9ac_Pro  | 7070  | 0.9871 | 0.0744 | 0.8700 |
| 0.01     | E003 | H3K9ac_Pro  | 3554  | 0.9870 | 0.0374 | 0.7846 |
| 0.01     | E101 | H3K9ac_Pro  | 5110  | 0.9869 | 0.0538 | 0.8322 |
| 0.01     | E115 | H3K9ac_Pro  | 3093  | 0.9868 | 0.0326 | 0.7708 |
| 0.01     | E043 | H3K27ac_Enf | 4644  | 0.9866 | 0.0489 | 0.8254 |
| 0.001    | E097 | H3K27ac_Enf | 454   | 0.9865 | 0.0487 | 0.6050 |
| 0.01     | E080 | H3K4me1_En  | 9921  | 0.9862 | 0.1044 | 0.9278 |
| 0.01     | E105 | H3K27ac_Enf | 8223  | 0.9861 | 0.0866 | 0.9070 |

|          |      |             |       |        |        |        |
|----------|------|-------------|-------|--------|--------|--------|
| 0.01     | E069 | H3K4me1_En  | 11510 | 0.9860 | 0.1212 | 0.9467 |
| 0.001    | E005 | H3K4me3_Pr  | 376   | 0.9858 | 0.0404 | 0.5984 |
| 0.01     | E071 | H3K27ac_Enf | 9908  | 0.9858 | 0.1043 | 0.9336 |
| 0.01     | E023 | H3K4me1_En  | 12479 | 0.9857 | 0.1314 | 0.9582 |
| 0.01     | E092 | H3K4me1_En  | 12259 | 0.9856 | 0.1291 | 0.9571 |
| 0.01     | E089 | H3K4me1_En  | 11996 | 0.9855 | 0.1263 | 0.9561 |
| 0.01     | E068 | H3K9ac_Pro  | 8475  | 0.9855 | 0.0892 | 0.9207 |
| 0.01     | E033 | H3K4me1_En  | 4218  | 0.9854 | 0.0444 | 0.8331 |
| 0.001    | E096 | H3K4me3_Pr  | 352   | 0.9853 | 0.0378 | 0.5980 |
| 0.01     | E113 | H3K27ac_Enf | 6208  | 0.9850 | 0.0654 | 0.8899 |
| 1.00E-04 | E125 | H3K4me3_Pr  | 37    | 0.9841 | 0.0355 | 0.4961 |
| 0.01     | E025 | H3K4me1_En  | 13282 | 0.9841 | 0.1398 | 0.9771 |
| 0.001    | E110 | H3K4me3_Pr  | 384   | 0.9837 | 0.0412 | 0.6162 |
| 0.001    | E047 | H3K4me1_En  | 870   | 0.9835 | 0.0934 | 0.6892 |
| 0.01     | E114 | H3K27ac_Enf | 4674  | 0.9835 | 0.0492 | 0.8772 |
| 0.01     | E050 | H3K4me1_En  | 9679  | 0.9834 | 0.1019 | 0.9592 |
| 0.01     | E063 | H3K27ac_Enf | 8077  | 0.9832 | 0.0850 | 0.9437 |
| 0.01     | E110 | H3K9ac_Pro  | 6389  | 0.9832 | 0.0673 | 0.9191 |
| 0.001    | E066 | H3K4me1_En  | 959   | 0.9830 | 0.1029 | 0.7053 |
| 0.01     | E091 | H3K4me1_En  | 8922  | 0.9828 | 0.0939 | 0.9573 |
| 1.00E-05 | E005 | H3K4me1_En  | 10    | 0.9826 | 0.1053 | 0.4402 |
| 0.01     | E120 | H3K27ac_Enf | 3496  | 0.9822 | 0.0368 | 0.8586 |
| 0.01     | E071 | H3K4me1_En  | 13637 | 0.9820 | 0.1436 | 0.9892 |
| 0.001    | E017 | H3K4me1_En  | 984   | 0.9819 | 0.1056 | 0.7219 |
| 0.001    | E076 | H3K4me1_En  | 945   | 0.9818 | 0.1014 | 0.7179 |
| 0.01     | E039 | H3K4me1_En  | 9071  | 0.9818 | 0.0955 | 0.9673 |
| 0.01     | E027 | H3K9ac_Pro  | 9343  | 0.9816 | 0.0984 | 0.9705 |
| 0.01     | E041 | H3K27ac_Enf | 7111  | 0.9816 | 0.0749 | 0.9483 |
| 0.01     | E055 | H3K4me1_En  | 14366 | 0.9815 | 0.1512 | 0.9924 |
| 0.01     | E052 | H3K9ac_Pro  | 4577  | 0.9814 | 0.0482 | 0.9022 |
| 0.01     | E042 | H3K4me1_En  | 8195  | 0.9813 | 0.0863 | 0.9627 |
| 0.001    | E055 | H3K4me3_Pr  | 478   | 0.9813 | 0.0513 | 0.6532 |
| 0.001    | E091 | H3K4me3_Pr  | 139   | 0.9812 | 0.0149 | 0.5677 |
| 0.01     | E126 | H3K27ac_Enf | 3538  | 0.9811 | 0.0372 | 0.8744 |
| 0.01     | E113 | H3K4me1_En  | 12346 | 0.9809 | 0.1300 | 0.9892 |
| 1.00E-04 | E086 | H3K9ac_Pro  | 19    | 0.9809 | 0.0182 | 0.4734 |
| 0.01     | E069 | H3K27ac_Enf | 10773 | 0.9804 | 0.1134 | 0.9855 |
| 0.01     | E079 | H3K27ac_Enf | 5954  | 0.9803 | 0.0627 | 0.9430 |
| 0.01     | E124 | H3K27ac_Enf | 9551  | 0.9801 | 0.1005 | 0.9811 |
| 0.01     | E068 | H3K4me1_En  | 12615 | 0.9799 | 0.1328 | 0.9931 |
| 0.01     | E125 | H3K27ac_Enf | 5358  | 0.9796 | 0.0564 | 0.9392 |
| 0.01     | E119 | H3K27ac_Enf | 4055  | 0.9793 | 0.0427 | 0.9125 |
| 0.01     | E110 | H3K4me1_En  | 11875 | 0.9793 | 0.1250 | 0.9928 |

|          |      |             |       |        |        |        |
|----------|------|-------------|-------|--------|--------|--------|
| 0.01     | E094 | H3K27ac_Enf | 4613  | 0.9791 | 0.0486 | 0.9287 |
| 0.01     | E128 | H3K27ac_Enf | 4123  | 0.9789 | 0.0434 | 0.9185 |
| 0.01     | E069 | H3K9ac_Pro  | 5102  | 0.9789 | 0.0537 | 0.9412 |
| 0.01     | E126 | H3K4me1_En  | 6465  | 0.9787 | 0.0681 | 0.9631 |
| 0.01     | E107 | H3K4me1_En  | 8744  | 0.9787 | 0.0920 | 0.9827 |
| 0.01     | E056 | H3K27ac_Enf | 11831 | 0.9786 | 0.1245 | 0.9942 |
| 0.001    | E006 | H3K4me3_Pr  | 429   | 0.9784 | 0.0460 | 0.6672 |
| 0.001    | E094 | H3K4me1_En  | 885   | 0.9783 | 0.0950 | 0.7476 |
| 0.01     | E109 | H3K4me1_En  | 9846  | 0.9783 | 0.1037 | 0.9894 |
| 0.01     | E100 | H3K4me1_En  | 7359  | 0.9783 | 0.0775 | 0.9752 |
| 0.001    | E031 | H3K4me3_Pr  | 163   | 0.9780 | 0.0175 | 0.5931 |
| 0.01     | E127 | H3K4me3_Pr  | 3567  | 0.9779 | 0.0376 | 0.9122 |
| 0.01     | E034 | H3K4me1_En  | 8883  | 0.9778 | 0.0935 | 0.9869 |
| 0.01     | E016 | H3K9ac_Pro  | 4354  | 0.9778 | 0.0458 | 0.9352 |
| 0.01     | E119 | H3K4me1_En  | 7005  | 0.9777 | 0.0737 | 0.9753 |
| 0.01     | E010 | H3K4me1_En  | 9377  | 0.9776 | 0.0987 | 0.9896 |
| 1.00E-05 | E096 | H3K27ac_Enf | 7     | 0.9776 | 0.0737 | 0.4260 |
| 0.01     | E051 | H3K4me1_En  | 7835  | 0.9776 | 0.0825 | 0.9821 |
| 0.01     | E059 | H3K4me1_En  | 6199  | 0.9775 | 0.0653 | 0.9678 |
| 0.01     | E103 | H3K9ac_Pro  | 4018  | 0.9774 | 0.0423 | 0.9303 |
| 0.001    | E097 | H3K4me1_En  | 821   | 0.9774 | 0.0881 | 0.7476 |
| 0.01     | E125 | H3K4me1_En  | 9974  | 0.9773 | 0.1050 | 0.9924 |
| 1.00E-04 | E076 | H3K9ac_Pro  | 48    | 0.9772 | 0.0460 | 0.5273 |
| 0.001    | E006 | H3K27ac_Enf | 463   | 0.9771 | 0.0497 | 0.6854 |
| 0.01     | E128 | H3K4me1_En  | 6158  | 0.9771 | 0.0648 | 0.9700 |
| 0.01     | E053 | H3K4me1_En  | 8532  | 0.9771 | 0.0898 | 0.9877 |
| 0.001    | E097 | H3K4me3_Pr  | 182   | 0.9770 | 0.0195 | 0.6061 |
| 0.001    | E073 | H3K9ac_Pro  | 455   | 0.9769 | 0.0488 | 0.6854 |
| 0.01     | E075 | H3K4me1_En  | 9347  | 0.9766 | 0.0984 | 0.9920 |
| 1.00E-04 | E088 | H3K9ac_Pro  | 64    | 0.9766 | 0.0614 | 0.5452 |
| 0.01     | E102 | H3K9ac_Pro  | 4990  | 0.9765 | 0.0525 | 0.9574 |
| 1.00E-04 | E087 | H3K9ac_Pro  | 20    | 0.9765 | 0.0192 | 0.4840 |
| 0.001    | E071 | H3K4me1_En  | 1330  | 0.9764 | 0.1427 | 0.8226 |
| 0.01     | E092 | H3K27ac_Enf | 5792  | 0.9764 | 0.0610 | 0.9697 |
| 0.01     | E108 | H3K4me1_En  | 12169 | 0.9763 | 0.1281 | 0.9977 |
| 0.01     | E040 | H3K4me1_En  | 8365  | 0.9758 | 0.0881 | 0.9907 |
| 0.01     | E119 | H3K9ac_Pro  | 3676  | 0.9757 | 0.0387 | 0.9351 |
| 0.01     | E106 | H3K27ac_Enf | 6306  | 0.9754 | 0.0664 | 0.9799 |
| 0.01     | E075 | H3K27ac_Enf | 6764  | 0.9753 | 0.0712 | 0.9837 |
| 0.01     | E125 | H3K9ac_Pro  | 4955  | 0.9752 | 0.0522 | 0.9653 |
| 0.001    | E117 | H3K4me1_En  | 822   | 0.9751 | 0.0882 | 0.7696 |
| 0.01     | E026 | H3K4me1_En  | 9764  | 0.9751 | 0.1028 | 0.9959 |
| 0.01     | E039 | H3K27ac_Enf | 4954  | 0.9750 | 0.0522 | 0.9661 |



|          |      |             |       |        |        |        |
|----------|------|-------------|-------|--------|--------|--------|
| 0.001    | E049 | H3K4me3_Pr  | 350   | 0.9748 | 0.0376 | 0.6746 |
| 0.01     | E021 | H3K27ac_Enf | 2709  | 0.9747 | 0.0285 | 0.9107 |
| 0.001    | E117 | H3K27ac_Enf | 445   | 0.9747 | 0.0478 | 0.7001 |
| 0.01     | E084 | H3K27ac_Enf | 5199  | 0.9746 | 0.0547 | 0.9716 |
| 0.01     | E097 | H3K4me1_En  | 8347  | 0.9746 | 0.0879 | 0.9932 |
| 1.00E-04 | E108 | H3K9ac_Pro  | 65    | 0.9745 | 0.0623 | 0.5534 |
| 1.00E-05 | E067 | H3K9ac_Pro  | 7     | 0.9739 | 0.0737 | 0.4303 |
| 1.00E-04 | E008 | H3K27ac_Enf | 62    | 0.9739 | 0.0594 | 0.5524 |
| 0.001    | E043 | H3K4me3_Pr  | 292   | 0.9737 | 0.0313 | 0.6650 |
| 0.01     | E034 | H3K27ac_Enf | 4320  | 0.9736 | 0.0455 | 0.9638 |
| 0.01     | E062 | H3K27ac_Enf | 2381  | 0.9730 | 0.0251 | 0.9104 |
| 0.01     | E020 | H3K27ac_Enf | 7507  | 0.9730 | 0.0790 | 0.9934 |
| 0.01     | E121 | H3K27ac_Enf | 5431  | 0.9730 | 0.0572 | 0.9813 |
| 0.01     | E102 | H3K4me1_En  | 9582  | 0.9730 | 0.1009 | 0.9977 |
| 0.01     | E029 | H3K4me1_En  | 6525  | 0.9729 | 0.0687 | 0.9895 |
| 0.01     | E111 | H3K27ac_Enf | 7306  | 0.9728 | 0.0769 | 0.9930 |
| 0.01     | E114 | H3K4me1_En  | 10232 | 0.9726 | 0.1077 | 0.9986 |
| 0.001    | E091 | H3K4me1_En  | 866   | 0.9726 | 0.0929 | 0.7997 |
| 0.01     | E120 | H3K4me1_En  | 6974  | 0.9725 | 0.0734 | 0.9923 |
| 0.01     | E093 | H3K4me1_En  | 9907  | 0.9724 | 0.1043 | 0.9984 |
| 0.01     | E085 | H3K27ac_Enf | 5300  | 0.9723 | 0.0558 | 0.9824 |
| 0.01     | E045 | H3K27ac_Enf | 4102  | 0.9723 | 0.0432 | 0.9670 |
| 0.01     | E041 | H3K4me1_En  | 9962  | 0.9720 | 0.1049 | 0.9987 |
| 0.001    | E117 | H3K9ac_Pro  | 440   | 0.9719 | 0.0472 | 0.7201 |
| 0.001    | E048 | H3K4me1_En  | 804   | 0.9719 | 0.0863 | 0.7959 |
| 0.01     | E043 | H3K4me1_En  | 9070  | 0.9719 | 0.0955 | 0.9979 |
| 0.01     | E124 | H3K4me1_En  | 8126  | 0.9717 | 0.0855 | 0.9967 |
| 0.01     | E030 | H3K4me3_Pr  | 2579  | 0.9715 | 0.0271 | 0.9311 |
| 0.001    | E069 | H3K4me1_En  | 1112  | 0.9712 | 0.1194 | 0.8472 |
| 0.01     | E028 | H3K4me1_En  | 11903 | 0.9712 | 0.1253 | 0.9997 |
| 0.01     | E056 | H3K4me1_En  | 15206 | 0.9710 | 0.1601 | 1.0000 |
| 0.01     | E052 | H3K4me1_En  | 9386  | 0.9710 | 0.0988 | 0.9987 |
| 0.01     | E004 | H3K9ac_Pro  | 3455  | 0.9709 | 0.0364 | 0.9615 |
| 0.01     | E015 | H3K9ac_Pro  | 5210  | 0.9708 | 0.0548 | 0.9861 |
| 1.00E-04 | E121 | H3K4me1_En  | 114   | 0.9706 | 0.1093 | 0.6092 |
| 0.01     | E035 | H3K4me1_En  | 4744  | 0.9704 | 0.0499 | 0.9833 |
| 0.01     | E111 | H3K4me1_En  | 10050 | 0.9701 | 0.1058 | 0.9994 |
| 0.01     | E090 | H3K4me1_En  | 10896 | 0.9701 | 0.1147 | 0.9996 |
| 0.01     | E061 | H3K27ac_Enf | 8290  | 0.9697 | 0.0873 | 0.9984 |
| 0.001    | E086 | H3K4me3_Pr  | 171   | 0.9696 | 0.0184 | 0.6403 |
| 0.01     | E088 | H3K4me1_En  | 12548 | 0.9695 | 0.1321 | 0.9999 |
| 0.01     | E022 | H3K4me1_En  | 9591  | 0.9694 | 0.1010 | 0.9994 |
| 0.01     | E116 | H3K4me3_Pr  | 3278  | 0.9694 | 0.0345 | 0.9650 |

|          |      |             |       |        |        |        |
|----------|------|-------------|-------|--------|--------|--------|
| 0.01     | E036 | H3K4me1_En  | 7988  | 0.9690 | 0.0841 | 0.9984 |
| 0.01     | E129 | H3K27ac_Enf | 7615  | 0.9689 | 0.0802 | 0.9980 |
| 0.01     | E112 | H3K4me1_En  | 5023  | 0.9689 | 0.0529 | 0.9894 |
| 0.01     | E007 | H3K4me1_En  | 8266  | 0.9688 | 0.0870 | 0.9988 |
| 0.01     | E046 | H3K4me1_En  | 7442  | 0.9688 | 0.0783 | 0.9979 |
| 0.001    | E053 | H3K4me3_Pr  | 176   | 0.9688 | 0.0189 | 0.6470 |
| 0.001    | E076 | H3K27ac_Enf | 764   | 0.9685 | 0.0820 | 0.8171 |
| 0.01     | E024 | H3K4me1_En  | 13477 | 0.9685 | 0.1419 | 1.0000 |
| 0.01     | E054 | H3K4me1_En  | 7330  | 0.9685 | 0.0772 | 0.9979 |
| 0.001    | E029 | H3K4me1_En  | 637   | 0.9683 | 0.0684 | 0.7941 |
| 0.01     | E038 | H3K4me1_En  | 7946  | 0.9683 | 0.0836 | 0.9987 |
| 0.01     | E121 | H3K4me1_En  | 10356 | 0.9681 | 0.1090 | 0.9998 |
| 0.001    | E041 | H3K4me1_En  | 973   | 0.9679 | 0.1044 | 0.8557 |
| 0.001    | E056 | H3K4me3_Pr  | 652   | 0.9677 | 0.0700 | 0.8021 |
| 1.00E-04 | E043 | H3K27ac_Enf | 50    | 0.9674 | 0.0479 | 0.5588 |
| 0.01     | E066 | H3K27ac_Enf | 6856  | 0.9674 | 0.0722 | 0.9979 |
| 0.001    | E105 | H3K27ac_Enf | 791   | 0.9671 | 0.0849 | 0.8329 |
| 0.01     | E004 | H3K27ac_Enf | 5199  | 0.9670 | 0.0547 | 0.9937 |
| 0.01     | E096 | H3K27ac_Enf | 6923  | 0.9669 | 0.0729 | 0.9982 |
| 0.01     | E068 | H3K27ac_Enf | 10791 | 0.9668 | 0.1136 | 0.9999 |
| 0.01     | E065 | H3K4me1_En  | 6289  | 0.9665 | 0.0662 | 0.9975 |
| 0.01     | E063 | H3K4me1_En  | 11862 | 0.9664 | 0.1249 | 1.0000 |
| 0.01     | E028 | H3K4me3_Pr  | 2379  | 0.9663 | 0.0250 | 0.9543 |
| 1.00E-05 | E041 | H3K27ac_Enf | 7     | 0.9662 | 0.0737 | 0.4392 |
| 0.01     | E127 | H3K4me1_En  | 7858  | 0.9661 | 0.0827 | 0.9993 |
| 0.01     | E037 | H3K4me1_En  | 8545  | 0.9659 | 0.0900 | 0.9996 |
| 0.001    | E035 | H3K4me1_En  | 463   | 0.9656 | 0.0497 | 0.7726 |
| 0.01     | E003 | H3K27ac_Enf | 5359  | 0.9656 | 0.0564 | 0.9960 |
| 0.001    | E104 | H3K4me1_En  | 856   | 0.9651 | 0.0919 | 0.8588 |
| 0.01     | E065 | H3K27ac_Enf | 3854  | 0.9651 | 0.0406 | 0.9880 |
| 0.01     | E087 | H3K27ac_Enf | 2994  | 0.9648 | 0.0315 | 0.9770 |
| 0.01     | E094 | H3K4me1_En  | 8897  | 0.9646 | 0.0937 | 0.9998 |
| 0.01     | E077 | H3K4me1_En  | 11067 | 0.9645 | 0.1165 | 1.0000 |
| 0.01     | E048 | H3K4me1_En  | 8133  | 0.9643 | 0.0856 | 0.9997 |
| 0.01     | E096 | H3K4me1_En  | 10657 | 0.9642 | 0.1122 | 1.0000 |
| 0.01     | E066 | H3K9ac_Pro  | 5736  | 0.9641 | 0.0604 | 0.9979 |
| 0.001    | E125 | H3K4me1_En  | 965   | 0.9640 | 0.1036 | 0.8829 |
| 0.001    | E024 | H3K4me3_Pr  | 263   | 0.9640 | 0.0282 | 0.7145 |
| 0.01     | E006 | H3K27ac_Enf | 4657  | 0.9639 | 0.0490 | 0.9950 |
| 0.01     | E011 | H3K9ac_Pro  | 3203  | 0.9639 | 0.0337 | 0.9830 |
| 0.01     | E049 | H3K9ac_Pro  | 5859  | 0.9635 | 0.0617 | 0.9984 |
| 0.01     | E063 | H3K9ac_Pro  | 7631  | 0.9635 | 0.0803 | 0.9997 |
| 0.01     | E018 | H3K4me1_En  | 12324 | 0.9632 | 0.1297 | 1.0000 |

|          |      |             |       |        |        |        |
|----------|------|-------------|-------|--------|--------|--------|
| 0.01     | E122 | H3K4me1_En  | 5904  | 0.9631 | 0.0622 | 0.9986 |
| 0.001    | E082 | H3K4me3_Pr  | 206   | 0.9629 | 0.0221 | 0.6935 |
| 0.01     | E055 | H3K27ac_Enf | 11328 | 0.9624 | 0.1193 | 1.0000 |
| 1.00E-04 | E086 | H3K4me3_Pr  | 19    | 0.9623 | 0.0182 | 0.5075 |
| 0.01     | E001 | H3K4me1_En  | 12834 | 0.9623 | 0.1351 | 1.0000 |
| 0.001    | E109 | H3K27ac_Enf | 624   | 0.9622 | 0.0670 | 0.8356 |
| 1.00E-04 | E027 | H3K4me3_Pr  | 30    | 0.9621 | 0.0288 | 0.5381 |
| 0.01     | E017 | H3K4me1_En  | 9829  | 0.9619 | 0.1035 | 1.0000 |
| 0.001    | E077 | H3K4me3_Pr  | 443   | 0.9619 | 0.0475 | 0.7920 |
| 0.01     | E002 | H3K9ac_Pro  | 704   | 0.9615 | 0.0074 | 0.8478 |
| 0.001    | E075 | H3K27ac_Enf | 654   | 0.9614 | 0.0702 | 0.8473 |
| 0.001    | E056 | H3K27ac_Enf | 1140  | 0.9614 | 0.1224 | 0.9211 |
| 1.00E-04 | E112 | H3K27ac_Enf | 40    | 0.9614 | 0.0384 | 0.5602 |
| 1.00E-04 | E016 | H3K9ac_Pro  | 47    | 0.9613 | 0.0451 | 0.5725 |
| 0.01     | E103 | H3K27ac_Enf | 5590  | 0.9612 | 0.0588 | 0.9989 |
| 0.001    | E080 | H3K27ac_Enf | 724   | 0.9612 | 0.0777 | 0.8627 |
| 0.01     | E058 | H3K4me1_En  | 11756 | 0.9610 | 0.1238 | 1.0000 |
| 0.01     | E101 | H3K4me1_En  | 9282  | 0.9609 | 0.0977 | 1.0000 |
| 0.01     | E016 | H3K27ac_Enf | 5204  | 0.9609 | 0.0548 | 0.9985 |
| 0.01     | E018 | H3K9ac_Pro  | 6513  | 0.9608 | 0.0686 | 0.9996 |
| 0.001    | E079 | H3K4me3_Pr  | 220   | 0.9608 | 0.0236 | 0.7121 |
| 1.00E-04 | E082 | H3K4me3_Pr  | 23    | 0.9604 | 0.0221 | 0.5239 |
| 0.001    | E011 | H3K9ac_Pro  | 313   | 0.9603 | 0.0336 | 0.7568 |
| 0.01     | E062 | H3K9ac_Pro  | 7662  | 0.9603 | 0.0807 | 0.9999 |
| 0.01     | E106 | H3K4me1_En  | 5129  | 0.9602 | 0.0540 | 0.9987 |
| 0.01     | E098 | H3K4me1_En  | 9987  | 0.9601 | 0.1051 | 1.0000 |
| 0.01     | E026 | H3K9ac_Pro  | 3910  | 0.9601 | 0.0412 | 0.9955 |
| 0.001    | E033 | H3K4me1_En  | 403   | 0.9599 | 0.0433 | 0.7918 |
| 0.001    | E046 | H3K27ac_Enf | 301   | 0.9596 | 0.0323 | 0.7561 |
| 0.01     | E032 | H3K4me1_En  | 7705  | 0.9596 | 0.0811 | 0.9999 |
| 0.01     | E014 | H3K4me1_En  | 12359 | 0.9596 | 0.1301 | 1.0000 |
| 0.01     | E076 | H3K4me1_En  | 9416  | 0.9595 | 0.0991 | 1.0000 |
| 0.01     | E019 | H3K27ac_Enf | 2512  | 0.9595 | 0.0264 | 0.9823 |
| 1.00E-04 | E121 | H3K4me3_Pr  | 39    | 0.9594 | 0.0374 | 0.5636 |
| 1.00E-05 | E105 | H3K27ac_Enf | 8     | 0.9593 | 0.0842 | 0.4568 |
| 0.01     | E009 | H3K4me1_En  | 8419  | 0.9593 | 0.0886 | 1.0000 |
| 0.01     | E070 | H3K4me1_En  | 5622  | 0.9587 | 0.0592 | 0.9995 |
| 0.01     | E049 | H3K4me1_En  | 10856 | 0.9586 | 0.1143 | 1.0000 |
| 0.01     | E031 | H3K4me1_En  | 5315  | 0.9584 | 0.0560 | 0.9993 |
| 0.01     | E002 | H3K4me1_En  | 6842  | 0.9584 | 0.0720 | 0.9999 |
| 0.01     | E103 | H3K4me1_En  | 6686  | 0.9583 | 0.0704 | 0.9999 |
| 0.001    | E106 | H3K4me1_En  | 502   | 0.9582 | 0.0539 | 0.8321 |
| 0.01     | E099 | H3K4me1_En  | 10091 | 0.9580 | 0.1062 | 1.0000 |

|          |      |             |       |        |        |        |
|----------|------|-------------|-------|--------|--------|--------|
| 0.001    | E055 | H3K4me1_En  | 1375  | 0.9578 | 0.1476 | 0.9582 |
| 1.00E-05 | E056 | H3K4me1_En  | 15    | 0.9578 | 0.1579 | 0.5053 |
| 0.01     | E122 | H3K27ac_Enf | 3433  | 0.9577 | 0.0361 | 0.9952 |
| 0.01     | E057 | H3K4me1_En  | 7951  | 0.9576 | 0.0837 | 1.0000 |
| 1.00E-05 | E095 | H3K4me1_En  | 9     | 0.9576 | 0.0947 | 0.4677 |
| 0.01     | E061 | H3K4me1_En  | 12009 | 0.9574 | 0.1264 | 1.0000 |
| 0.001    | E017 | H3K27ac_Enf | 511   | 0.9570 | 0.0548 | 0.8416 |
| 0.01     | E019 | H3K4me1_En  | 9062  | 0.9569 | 0.0954 | 1.0000 |
| 0.01     | E014 | H3K9ac_Pro  | 3758  | 0.9568 | 0.0396 | 0.9972 |
| 0.01     | E084 | H3K4me1_En  | 9715  | 0.9567 | 0.1023 | 1.0000 |
| 0.001    | E075 | H3K4me1_En  | 898   | 0.9567 | 0.0964 | 0.9174 |
| 0.001    | E074 | H3K27ac_Enf | 883   | 0.9565 | 0.0948 | 0.9160 |
| 0.01     | E021 | H3K4me1_En  | 6744  | 0.9565 | 0.0710 | 0.9999 |
| 0.001    | E100 | H3K4me3_Pri | 184   | 0.9564 | 0.0197 | 0.7147 |
| 0.01     | E087 | H3K4me1_En  | 8790  | 0.9559 | 0.0925 | 1.0000 |
| 0.001    | E113 | H3K4me3_Pri | 1021  | 0.9559 | 0.1096 | 0.9360 |
| 0.001    | E126 | H3K4me3_Pri | 169   | 0.9558 | 0.0181 | 0.7080 |
| 0.001    | E105 | H3K4me3_Pri | 233   | 0.9557 | 0.0250 | 0.7463 |
| 0.001    | E129 | H3K4me1_En  | 925   | 0.9554 | 0.0993 | 0.9269 |
| 0.01     | E116 | H3K9ac_Pro  | 2593  | 0.9554 | 0.0273 | 0.9910 |
| 0.01     | E016 | H3K4me1_En  | 11791 | 0.9551 | 0.1241 | 1.0000 |
| 0.01     | E026 | H3K27ac_Enf | 5115  | 0.9550 | 0.0538 | 0.9997 |
| 0.001    | E115 | H3K4me3_Pri | 220   | 0.9548 | 0.0236 | 0.7441 |
| 0.001    | E105 | H3K4me1_En  | 1196  | 0.9548 | 0.1284 | 0.9566 |
| 0.001    | E004 | H3K4me3_Pri | 110   | 0.9543 | 0.0118 | 0.6679 |
| 0.01     | E079 | H3K4me1_En  | 9052  | 0.9543 | 0.0953 | 1.0000 |
| 1.00E-04 | E110 | H3K4me1_En  | 127   | 0.9538 | 0.1218 | 0.6969 |
| 0.001    | E100 | H3K27ac_Enf | 442   | 0.9538 | 0.0474 | 0.8404 |
| 0.01     | E076 | H3K27ac_Enf | 7671  | 0.9538 | 0.0808 | 1.0000 |
| 0.001    | E059 | H3K27ac_Enf | 489   | 0.9538 | 0.0525 | 0.8542 |
| 0.001    | E080 | H3K4me1_En  | 941   | 0.9537 | 0.1010 | 0.9367 |
| 0.001    | E116 | H3K27ac_Enf | 381   | 0.9536 | 0.0409 | 0.8216 |
| 0.001    | E018 | H3K9ac_Pro  | 634   | 0.9536 | 0.0680 | 0.8896 |
| 0.001    | E074 | H3K4me1_En  | 1069  | 0.9534 | 0.1147 | 0.9508 |
| 0.01     | E078 | H3K27ac_Enf | 5339  | 0.9533 | 0.0562 | 0.9999 |
| 0.01     | E083 | H3K9ac_Pro  | 7650  | 0.9532 | 0.0805 | 1.0000 |
| 0.001    | E041 | H3K4me3_Pri | 366   | 0.9531 | 0.0393 | 0.8191 |
| 0.001    | E095 | H3K27ac_Enf | 546   | 0.9528 | 0.0586 | 0.8742 |
| 0.01     | E124 | H3K9ac_Pro  | 6046  | 0.9526 | 0.0636 | 1.0000 |
| 0.01     | E046 | H3K27ac_Enf | 3046  | 0.9525 | 0.0321 | 0.9970 |
| 1.00E-04 | E075 | H3K9ac_Pro  | 54    | 0.9524 | 0.0518 | 0.6109 |
| 0.01     | E095 | H3K4me1_En  | 8950  | 0.9523 | 0.0942 | 1.0000 |
| 0.01     | E020 | H3K4me1_En  | 11661 | 0.9521 | 0.1228 | 1.0000 |

|          |      |             |       |        |        |        |
|----------|------|-------------|-------|--------|--------|--------|
| 0.01     | E101 | H3K27ac_Enf | 6535  | 0.9513 | 0.0688 | 1.0000 |
| 0.001    | E098 | H3K4me1_En  | 970   | 0.9508 | 0.1041 | 0.9513 |
| 0.01     | E118 | H3K27ac_Enf | 3189  | 0.9506 | 0.0336 | 0.9983 |
| 0.01     | E015 | H3K4me1_En  | 11852 | 0.9504 | 0.1248 | 1.0000 |
| 0.001    | E025 | H3K4me3_Pr  | 506   | 0.9504 | 0.0543 | 0.8768 |
| 0.01     | E112 | H3K27ac_Enf | 3600  | 0.9500 | 0.0379 | 0.9992 |
| 0.01     | E085 | H3K4me1_En  | 10330 | 0.9498 | 0.1087 | 1.0000 |
| 0.001    | E112 | H3K27ac_Enf | 353   | 0.9497 | 0.0379 | 0.8319 |
| 1.00E-04 | E072 | H3K4me3_Pr  | 47    | 0.9495 | 0.0451 | 0.6069 |
| 0.001    | E034 | H3K27ac_Enf | 413   | 0.9490 | 0.0443 | 0.8568 |
| 0.001    | E073 | H3K4me1_En  | 1094  | 0.9488 | 0.1174 | 0.9679 |
| 0.01     | E007 | H3K27ac_Enf | 2892  | 0.9482 | 0.0304 | 0.9982 |
| 0.001    | E070 | H3K4me3_Pr  | 224   | 0.9482 | 0.0240 | 0.7790 |
| 0.001    | E122 | H3K9ac_Pro  | 275   | 0.9481 | 0.0295 | 0.8069 |
| 0.001    | E102 | H3K27ac_Enf | 564   | 0.9480 | 0.0605 | 0.9023 |
| 0.001    | E040 | H3K4me1_En  | 797   | 0.9479 | 0.0855 | 0.9422 |
| 0.01     | E116 | H3K27ac_Enf | 3861  | 0.9478 | 0.0406 | 0.9997 |
| 0.001    | E114 | H3K4me1_En  | 978   | 0.9478 | 0.1050 | 0.9616 |
| 0.001    | E092 | H3K4me1_En  | 1156  | 0.9476 | 0.1241 | 0.9749 |
| 0.01     | E078 | H3K4me1_En  | 10211 | 0.9475 | 0.1075 | 1.0000 |
| 1.00E-04 | E118 | H3K4me1_En  | 81    | 0.9475 | 0.0777 | 0.6693 |
| 0.001    | E056 | H3K4me1_En  | 1455  | 0.9473 | 0.1562 | 0.9881 |
| 0.01     | E066 | H3K4me1_En  | 9422  | 0.9473 | 0.0992 | 1.0000 |
| 0.001    | E068 | H3K4me1_En  | 1196  | 0.9471 | 0.1284 | 0.9781 |
| 0.01     | E014 | H3K27ac_Enf | 5568  | 0.9469 | 0.0586 | 1.0000 |
| 0.001    | E021 | H3K27ac_Enf | 258   | 0.9465 | 0.0277 | 0.8062 |
| 0.001    | E117 | H3K4me3_Pr  | 402   | 0.9455 | 0.0431 | 0.8702 |
| 0.01     | E104 | H3K4me1_En  | 8549  | 0.9454 | 0.0900 | 1.0000 |
| 1.00E-04 | E013 | H3K4me1_En  | 141   | 0.9453 | 0.1352 | 0.7491 |
| 0.001    | E039 | H3K27ac_Enf | 471   | 0.9451 | 0.0506 | 0.8924 |
| 0.01     | E099 | H3K27ac_Enf | 5027  | 0.9445 | 0.0529 | 1.0000 |
| 0.001    | E039 | H3K4me3_Pr  | 319   | 0.9442 | 0.0342 | 0.8456 |
| 0.01     | E076 | H3K9ac_Pro  | 4223  | 0.9440 | 0.0445 | 0.9999 |
| 0.01     | E127 | H3K27ac_Enf | 4175  | 0.9437 | 0.0440 | 0.9999 |
| 0.01     | E118 | H3K4me1_En  | 7346  | 0.9435 | 0.0773 | 1.0000 |
| 0.01     | E027 | H3K4me1_En  | 12959 | 0.9433 | 0.1364 | 1.0000 |
| 0.01     | E005 | H3K4me1_En  | 9594  | 0.9428 | 0.1010 | 1.0000 |
| 0.01     | E083 | H3K4me1_En  | 10123 | 0.9427 | 0.1066 | 1.0000 |
| 1.00E-04 | E099 | H3K4me1_En  | 109   | 0.9425 | 0.1045 | 0.7252 |
| 0.01     | E020 | H3K9ac_Pro  | 6242  | 0.9424 | 0.0657 | 1.0000 |
| 0.01     | E015 | H3K27ac_Enf | 6387  | 0.9423 | 0.0672 | 1.0000 |
| 0.01     | E049 | H3K27ac_Enf | 6508  | 0.9418 | 0.0685 | 1.0000 |
| 0.001    | E090 | H3K27ac_Enf | 539   | 0.9412 | 0.0579 | 0.9246 |

|          |      |             |       |        |        |        |
|----------|------|-------------|-------|--------|--------|--------|
| 0.001    | E108 | H3K4me1_En  | 1150  | 0.9407 | 0.1234 | 0.9869 |
| 0.01     | E093 | H3K27ac_Enf | 4808  | 0.9403 | 0.0506 | 1.0000 |
| 0.001    | E115 | H3K4me1_En  | 545   | 0.9397 | 0.0585 | 0.9315 |
| 0.001    | E088 | H3K9ac_Pro  | 550   | 0.9395 | 0.0590 | 0.9329 |
| 0.01     | E127 | H3K9ac_Pro  | 3699  | 0.9395 | 0.0389 | 1.0000 |
| 0.01     | E005 | H3K27ac_Enf | 4610  | 0.9391 | 0.0485 | 1.0000 |
| 0.001    | E059 | H3K4me1_En  | 584   | 0.9389 | 0.0627 | 0.9411 |
| 0.001    | E099 | H3K4me3_Pri | 244   | 0.9388 | 0.0262 | 0.8336 |
| 0.001    | E103 | H3K4me3_Pri | 408   | 0.9385 | 0.0438 | 0.9021 |
| 1.00E-04 | E011 | H3K4me3_Pri | 93    | 0.9384 | 0.0892 | 0.7200 |
| 0.001    | E047 | H3K9ac_Pro  | 479   | 0.9383 | 0.0514 | 0.9219 |
| 1.00E-05 | E010 | H3K4me1_En  | 9     | 0.9383 | 0.0947 | 0.4942 |
| 0.001    | E102 | H3K4me1_En  | 906   | 0.9379 | 0.0972 | 0.9790 |
| 0.001    | E123 | H3K4me3_Pri | 241   | 0.9378 | 0.0259 | 0.8361 |
| 0.001    | E042 | H3K4me3_Pri | 325   | 0.9377 | 0.0349 | 0.8766 |
| 0.001    | E044 | H3K27ac_Enf | 465   | 0.9374 | 0.0499 | 0.9218 |
| 0.001    | E040 | H3K27ac_Enf | 388   | 0.9370 | 0.0416 | 0.9017 |
| 0.01     | E011 | H3K4me1_En  | 12932 | 0.9367 | 0.1361 | 1.0000 |
| 0.001    | E108 | H3K27ac_Enf | 669   | 0.9366 | 0.0718 | 0.9603 |
| 1.00E-04 | E079 | H3K4me3_Pri | 24    | 0.9363 | 0.0230 | 0.5777 |
| 0.01     | E013 | H3K27ac_Enf | 8445  | 0.9361 | 0.0889 | 1.0000 |
| 1.00E-04 | E012 | H3K27ac_Enf | 93    | 0.9360 | 0.0892 | 0.7289 |
| 0.01     | E003 | H3K4me1_En  | 7107  | 0.9357 | 0.0748 | 1.0000 |
| 0.01     | E012 | H3K4me1_En  | 12557 | 0.9349 | 0.1322 | 1.0000 |
| 1.00E-05 | E024 | H3K4me1_En  | 13    | 0.9341 | 0.1368 | 0.5345 |
| 0.01     | E013 | H3K4me1_En  | 12688 | 0.9340 | 0.1336 | 1.0000 |
| 0.001    | E002 | H3K4me3_Pri | 463   | 0.9336 | 0.0497 | 0.9340 |
| 0.001    | E106 | H3K27ac_Enf | 592   | 0.9336 | 0.0635 | 0.9577 |
| 1.00E-05 | E026 | H3K27ac_Enf | 5     | 0.9335 | 0.0526 | 0.4481 |
| 0.001    | E058 | H3K4me3_Pri | 245   | 0.9330 | 0.0263 | 0.8580 |
| 1.00E-04 | E124 | H3K4me3_Pri | 48    | 0.9327 | 0.0460 | 0.6575 |
| 0.01     | E004 | H3K4me1_En  | 4110  | 0.9327 | 0.0433 | 1.0000 |
| 0.001    | E071 | H3K27ac_Enf | 919   | 0.9322 | 0.0986 | 0.9878 |
| 1.00E-05 | E083 | H3K4me3_Pri | 6     | 0.9321 | 0.0632 | 0.4660 |
| 0.01     | E032 | H3K27ac_Enf | 3274  | 0.9321 | 0.0345 | 1.0000 |
| 0.001    | E077 | H3K4me1_En  | 1049  | 0.9320 | 0.1126 | 0.9926 |
| 1.00E-05 | E111 | H3K27ac_Enf | 7     | 0.9320 | 0.0737 | 0.4800 |
| 0.001    | E114 | H3K4me3_Pri | 401   | 0.9319 | 0.0430 | 0.9235 |
| 0.001    | E122 | H3K4me1_En  | 560   | 0.9314 | 0.0601 | 0.9583 |
| 0.001    | E079 | H3K4me1_En  | 866   | 0.9308 | 0.0929 | 0.9870 |
| 0.001    | E073 | H3K27ac_Enf | 1054  | 0.9307 | 0.1131 | 0.9937 |
| 1.00E-04 | E058 | H3K4me1_En  | 125   | 0.9307 | 0.1198 | 0.7913 |
| 0.001    | E067 | H3K4me1_En  | 1056  | 0.9302 | 0.1133 | 0.9940 |

|          |      |             |      |        |        |        |
|----------|------|-------------|------|--------|--------|--------|
| 0.001    | E127 | H3K4me1_En  | 742  | 0.9301 | 0.0796 | 0.9804 |
| 1.00E-04 | E004 | H3K4me3_Pr  | 12   | 0.9300 | 0.0115 | 0.5268 |
| 0.001    | E100 | H3K4me1_En  | 686  | 0.9298 | 0.0736 | 0.9764 |
| 0.01     | E116 | H3K4me1_En  | 5860 | 0.9289 | 0.0617 | 1.0000 |
| 1.00E-04 | E032 | H3K4me3_Pr  | 17   | 0.9285 | 0.0163 | 0.5610 |
| 0.001    | E047 | H3K27ac_Enf | 262  | 0.9281 | 0.0281 | 0.8852 |
| 1.00E-05 | E106 | H3K27ac_Enf | 6    | 0.9279 | 0.0632 | 0.4707 |
| 0.001    | E088 | H3K4me1_En  | 1178 | 0.9279 | 0.1264 | 0.9972 |
| 1.00E-04 | E094 | H3K27ac_Enf | 48   | 0.9279 | 0.0460 | 0.6714 |
| 0.001    | E093 | H3K4me1_En  | 927  | 0.9276 | 0.0995 | 0.9924 |
| 0.001    | E058 | H3K4me1_En  | 1113 | 0.9276 | 0.1195 | 0.9965 |
| 1.00E-04 | E047 | H3K9ac_Pro  | 53   | 0.9274 | 0.0508 | 0.6847 |
| 0.001    | E069 | H3K9ac_Pro  | 474  | 0.9272 | 0.0509 | 0.9538 |
| 0.001    | E125 | H3K9ac_Pro  | 462  | 0.9270 | 0.0496 | 0.9519 |
| 0.001    | E002 | H3K4me1_En  | 649  | 0.9268 | 0.0697 | 0.9778 |
| 1.00E-04 | E061 | H3K27ac_Enf | 87   | 0.9268 | 0.0834 | 0.7522 |
| 0.001    | E022 | H3K4me1_En  | 899  | 0.9264 | 0.0965 | 0.9924 |
| 0.001    | E126 | H3K4me1_En  | 600  | 0.9261 | 0.0644 | 0.9742 |
| 1.00E-04 | E087 | H3K4me3_Pr  | 15   | 0.9257 | 0.0144 | 0.5542 |
| 0.01     | E022 | H3K27ac_Enf | 4044 | 0.9255 | 0.0426 | 1.0000 |
| 0.001    | E004 | H3K27ac_Enf | 488  | 0.9254 | 0.0524 | 0.9603 |
| 1.00E-04 | E101 | H3K4me3_Pr  | 47   | 0.9252 | 0.0451 | 0.6765 |
| 0.01     | E058 | H3K27ac_Enf | 7448 | 0.9246 | 0.0784 | 1.0000 |
| 0.001    | E027 | H3K9ac_Pro  | 863  | 0.9244 | 0.0926 | 0.9926 |
| 0.001    | E042 | H3K4me1_En  | 757  | 0.9242 | 0.0812 | 0.9885 |
| 0.001    | E026 | H3K4me1_En  | 907  | 0.9235 | 0.0973 | 0.9945 |
| 0.001    | E001 | H3K4me1_En  | 1208 | 0.9235 | 0.1297 | 0.9987 |
| 0.01     | E011 | H3K27ac_Enf | 8455 | 0.9233 | 0.0890 | 1.0000 |
| 0.001    | E067 | H3K27ac_Enf | 939  | 0.9232 | 0.1008 | 0.9954 |
| 1.00E-04 | E109 | H3K4me1_En  | 102  | 0.9230 | 0.0978 | 0.7885 |
| 0.001    | E043 | H3K27ac_Enf | 426  | 0.9227 | 0.0457 | 0.9548 |
| 0.001    | E036 | H3K4me3_Pr  | 254  | 0.9226 | 0.0273 | 0.8995 |
| 0.001    | E127 | H3K4me3_Pr  | 330  | 0.9224 | 0.0354 | 0.9306 |
| 0.001    | E068 | H3K9ac_Pro  | 778  | 0.9223 | 0.0835 | 0.9911 |
| 0.001    | E090 | H3K4me1_En  | 1016 | 0.9222 | 0.1090 | 0.9971 |
| 0.001    | E062 | H3K4me1_En  | 421  | 0.9221 | 0.0452 | 0.9551 |
| 0.001    | E017 | H3K9ac_Pro  | 402  | 0.9208 | 0.0431 | 0.9540 |
| 1.00E-04 | E106 | H3K4me1_En  | 54   | 0.9207 | 0.0518 | 0.7067 |
| 0.001    | E123 | H3K27ac_Enf | 252  | 0.9201 | 0.0270 | 0.9065 |
| 0.001    | E038 | H3K9ac_Pro  | 605  | 0.9199 | 0.0649 | 0.9834 |
| 0.01     | E008 | H3K4me1_En  | 4257 | 0.9196 | 0.0448 | 1.0000 |
| 0.001    | E103 | H3K4me1_En  | 629  | 0.9192 | 0.0675 | 0.9861 |
| 0.001    | E111 | H3K27ac_Enf | 677  | 0.9191 | 0.0727 | 0.9891 |

|          |      |             |      |        |        |        |
|----------|------|-------------|------|--------|--------|--------|
| 1.00E-04 | E002 | H3K4me3_Pr  | 51   | 0.9186 | 0.0489 | 0.7054 |
| 1.00E-05 | E017 | H3K27ac_Enf | 5    | 0.9184 | 0.0526 | 0.4638 |
| 1.00E-04 | E018 | H3K4me1_En  | 129  | 0.9182 | 0.1237 | 0.8406 |
| 1.00E-04 | E007 | H3K4me1_En  | 86   | 0.9180 | 0.0825 | 0.7798 |
| 1.00E-04 | E118 | H3K9ac_Pro  | 30   | 0.9179 | 0.0288 | 0.6420 |
| 0.001    | E051 | H3K4me3_Pr  | 332  | 0.9178 | 0.0356 | 0.9431 |
| 0.001    | E037 | H3K4me1_En  | 796  | 0.9174 | 0.0854 | 0.9949 |
| 0.001    | E074 | H3K9ac_Pro  | 442  | 0.9164 | 0.0474 | 0.9700 |
| 0.001    | E033 | H3K4me3_Pr  | 195  | 0.9162 | 0.0209 | 0.8863 |
| 1.00E-04 | E110 | H3K4me3_Pr  | 40   | 0.9154 | 0.0384 | 0.6831 |
| 0.001    | E044 | H3K4me3_Pr  | 278  | 0.9152 | 0.0298 | 0.9312 |
| 1.00E-04 | E011 | H3K27ac_Enf | 92   | 0.9150 | 0.0882 | 0.7996 |
| 0.001    | E069 | H3K27ac_Enf | 986  | 0.9149 | 0.1058 | 0.9986 |
| 0.01     | E012 | H3K27ac_Enf | 8278 | 0.9147 | 0.0871 | 1.0000 |
| 0.001    | E101 | H3K4me1_En  | 866  | 0.9141 | 0.0929 | 0.9975 |
| 0.001    | E115 | H3K9ac_Pro  | 281  | 0.9140 | 0.0302 | 0.9352 |
| 0.001    | E123 | H3K9ac_Pro  | 236  | 0.9135 | 0.0253 | 0.9174 |
| 0.001    | E122 | H3K27ac_Enf | 321  | 0.9130 | 0.0345 | 0.9506 |
| 1.00E-04 | E026 | H3K4me3_Pr  | 37   | 0.9125 | 0.0355 | 0.6805 |
| 1.00E-05 | E072 | H3K4me1_En  | 7    | 0.9123 | 0.0737 | 0.5047 |
| 1.00E-04 | E077 | H3K4me3_Pr  | 47   | 0.9116 | 0.0451 | 0.7141 |
| 0.001    | E023 | H3K9ac_Pro  | 640  | 0.9111 | 0.0687 | 0.9931 |
| 0.001    | E128 | H3K4me1_En  | 563  | 0.9108 | 0.0604 | 0.9893 |
| 0.001    | E047 | H3K4me3_Pr  | 229  | 0.9106 | 0.0246 | 0.9215 |
| 0.001    | E001 | H3K4me3_Pr  | 400  | 0.9106 | 0.0429 | 0.9722 |
| 1.00E-04 | E057 | H3K4me1_En  | 83   | 0.9105 | 0.0796 | 0.7983 |
| 0.001    | E061 | H3K4me1_En  | 1120 | 0.9103 | 0.1202 | 0.9997 |
| 0.001    | E052 | H3K4me1_En  | 863  | 0.9102 | 0.0926 | 0.9983 |
| 0.001    | E057 | H3K4me1_En  | 741  | 0.9099 | 0.0795 | 0.9966 |
| 0.001    | E010 | H3K4me1_En  | 856  | 0.9099 | 0.0919 | 0.9983 |
| 0.001    | E101 | H3K9ac_Pro  | 462  | 0.9097 | 0.0496 | 0.9818 |
| 0.001    | E025 | H3K9ac_Pro  | 646  | 0.9094 | 0.0693 | 0.9942 |
| 0.001    | E072 | H3K9ac_Pro  | 720  | 0.9094 | 0.0773 | 0.9963 |
| 1.00E-04 | E005 | H3K27ac_Enf | 49   | 0.9091 | 0.0470 | 0.7265 |
| 0.001    | E046 | H3K4me3_Pr  | 142  | 0.9089 | 0.0152 | 0.8668 |
| 0.001    | E112 | H3K4me1_En  | 462  | 0.9086 | 0.0496 | 0.9830 |
| 0.001    | E107 | H3K4me1_En  | 796  | 0.9084 | 0.0854 | 0.9979 |
| 0.001    | E014 | H3K4me1_En  | 1147 | 0.9080 | 0.1231 | 0.9998 |
| 0.001    | E109 | H3K4me1_En  | 896  | 0.9077 | 0.0962 | 0.9990 |
| 0.001    | E111 | H3K4me1_En  | 922  | 0.9074 | 0.0990 | 0.9992 |
| 0.001    | E004 | H3K4me1_En  | 392  | 0.9070 | 0.0421 | 0.9760 |
| 1.00E-04 | E023 | H3K4me1_En  | 126  | 0.9064 | 0.1208 | 0.8736 |
| 0.001    | E042 | H3K27ac_Enf | 365  | 0.9063 | 0.0392 | 0.9725 |



|          |      |             |      |        |        |        |
|----------|------|-------------|------|--------|--------|--------|
| 0.001    | E015 | H3K9ac_Pro  | 477  | 0.9062 | 0.0512 | 0.9868 |
| 0.001    | E124 | H3K27ac_Enf | 866  | 0.9060 | 0.0929 | 0.9990 |
| 0.001    | E018 | H3K4me1_En  | 1137 | 0.9060 | 0.1220 | 0.9998 |
| 0.001    | E077 | H3K9ac_Pro  | 451  | 0.9055 | 0.0484 | 0.9850 |
| 0.001    | E089 | H3K4me3_Pr  | 136  | 0.9054 | 0.0146 | 0.8712 |
| 0.001    | E063 | H3K27ac_Enf | 729  | 0.9048 | 0.0782 | 0.9978 |
| 0.001    | E087 | H3K4me1_En  | 816  | 0.9048 | 0.0876 | 0.9988 |
| 1.00E-05 | E096 | H3K4me1_En  | 10   | 0.9047 | 0.1053 | 0.5542 |
| 0.001    | E125 | H3K27ac_Enf | 485  | 0.9041 | 0.0521 | 0.9891 |
| 0.001    | E101 | H3K27ac_Enf | 609  | 0.9038 | 0.0654 | 0.9954 |
| 0.001    | E123 | H3K4me1_En  | 578  | 0.9034 | 0.0620 | 0.9945 |
| 1.00E-04 | E034 | H3K27ac_Enf | 44   | 0.9032 | 0.0422 | 0.7274 |
| 0.001    | E051 | H3K4me1_En  | 709  | 0.9019 | 0.0761 | 0.9981 |
| 0.001    | E085 | H3K27ac_Enf | 482  | 0.9016 | 0.0517 | 0.9907 |
| 0.001    | E094 | H3K4me3_Pr  | 345  | 0.9015 | 0.0370 | 0.9753 |
| 0.001    | E108 | H3K9ac_Pro  | 537  | 0.9012 | 0.0576 | 0.9939 |
| 0.001    | E103 | H3K27ac_Enf | 514  | 0.9011 | 0.0552 | 0.9928 |
| 0.001    | E063 | H3K4me3_Pr  | 396  | 0.9011 | 0.0425 | 0.9833 |
| 0.001    | E011 | H3K4me1_En  | 1220 | 0.9009 | 0.1309 | 1.0000 |
| 1.00E-04 | E074 | H3K4me1_En  | 113  | 0.9003 | 0.1083 | 0.8744 |
| 0.001    | E087 | H3K27ac_Enf | 274  | 0.9002 | 0.0294 | 0.9609 |
| 0.001    | E075 | H3K4me3_Pr  | 339  | 0.9000 | 0.0364 | 0.9760 |
| 0.001    | E121 | H3K4me1_En  | 944  | 0.8998 | 0.1013 | 0.9997 |
| 1.00E-05 | E058 | H3K4me1_En  | 11   | 0.8991 | 0.1158 | 0.5745 |
| 1.00E-05 | E017 | H3K9ac_Pro  | 4    | 0.8986 | 0.0421 | 0.4607 |
| 0.001    | E111 | H3K4me3_Pr  | 412  | 0.8984 | 0.0442 | 0.9874 |
| 1.00E-04 | E052 | H3K9ac_Pro  | 46   | 0.8983 | 0.0441 | 0.7462 |
| 0.001    | E116 | H3K9ac_Pro  | 239  | 0.8978 | 0.0257 | 0.9534 |
| 0.001    | E001 | H3K9ac_Pro  | 321  | 0.8977 | 0.0345 | 0.9756 |
| 1.00E-05 | E028 | H3K4me1_En  | 11   | 0.8974 | 0.1158 | 0.5773 |
| 1.00E-04 | E110 | H3K9ac_Pro  | 64   | 0.8970 | 0.0614 | 0.7982 |
| 0.001    | E087 | H3K9ac_Pro  | 164  | 0.8964 | 0.0176 | 0.9176 |
| 0.001    | E007 | H3K4me1_En  | 750  | 0.8962 | 0.0805 | 0.9992 |
| 0.001    | E014 | H3K4me3_Pr  | 378  | 0.8958 | 0.0406 | 0.9859 |
| 0.001    | E054 | H3K4me3_Pr  | 214  | 0.8957 | 0.0230 | 0.9471 |
| 0.001    | E109 | H3K4me3_Pr  | 232  | 0.8957 | 0.0249 | 0.9545 |
| 1.00E-05 | E121 | H3K27ac_Enf | 5    | 0.8957 | 0.0526 | 0.4881 |
| 0.001    | E055 | H3K27ac_Enf | 1034 | 0.8956 | 0.1110 | 0.9999 |
| 0.001    | E063 | H3K4me1_En  | 1078 | 0.8954 | 0.1157 | 1.0000 |
| 0.001    | E110 | H3K4me1_En  | 1065 | 0.8954 | 0.1143 | 1.0000 |
| 1.00E-05 | E107 | H3K4me1_En  | 8    | 0.8954 | 0.0842 | 0.5419 |
| 0.001    | E038 | H3K27ac_Enf | 309  | 0.8953 | 0.0332 | 0.9762 |
| 0.001    | E026 | H3K4me3_Pr  | 324  | 0.8945 | 0.0348 | 0.9797 |

|          |      |             |      |        |        |        |
|----------|------|-------------|------|--------|--------|--------|
| 0.001    | E036 | H3K4me1_En  | 723  | 0.8942 | 0.0776 | 0.9993 |
| 0.001    | E089 | H3K27ac_Enf | 500  | 0.8940 | 0.0537 | 0.9953 |
| 0.001    | E120 | H3K27ac_Enf | 312  | 0.8937 | 0.0335 | 0.9785 |
| 0.001    | E129 | H3K4me3_Pr  | 321  | 0.8929 | 0.0345 | 0.9808 |
| 1.00E-05 | E063 | H3K4me3_Pr  | 4    | 0.8926 | 0.0421 | 0.4665 |
| 0.001    | E084 | H3K27ac_Enf | 467  | 0.8926 | 0.0501 | 0.9945 |
| 0.001    | E129 | H3K27ac_Enf | 688  | 0.8925 | 0.0738 | 0.9992 |
| 0.001    | E092 | H3K27ac_Enf | 519  | 0.8920 | 0.0557 | 0.9966 |
| 0.001    | E120 | H3K4me1_En  | 627  | 0.8914 | 0.0673 | 0.9987 |
| 0.001    | E121 | H3K27ac_Enf | 488  | 0.8914 | 0.0524 | 0.9958 |
| 0.001    | E045 | H3K4me3_Pr  | 289  | 0.8913 | 0.0310 | 0.9767 |
| 0.001    | E119 | H3K4me1_En  | 626  | 0.8908 | 0.0672 | 0.9988 |
| 0.001    | E068 | H3K27ac_Enf | 975  | 0.8906 | 0.1046 | 1.0000 |
| 0.001    | E025 | H3K4me1_En  | 1179 | 0.8906 | 0.1265 | 1.0000 |
| 1.00E-05 | E129 | H3K27ac_Enf | 7    | 0.8906 | 0.0737 | 0.5326 |
| 0.001    | E116 | H3K4me1_En  | 551  | 0.8905 | 0.0591 | 0.9978 |
| 1.00E-04 | E009 | H3K4me3_Pr  | 18   | 0.8902 | 0.0173 | 0.6388 |
| 0.001    | E124 | H3K9ac_Pro  | 554  | 0.8900 | 0.0595 | 0.9979 |
| 1.00E-04 | E068 | H3K4me3_Pr  | 47   | 0.8900 | 0.0451 | 0.7706 |
| 0.001    | E005 | H3K4me1_En  | 888  | 0.8897 | 0.0953 | 0.9999 |
| 0.001    | E099 | H3K4me1_En  | 919  | 0.8896 | 0.0986 | 0.9999 |
| 0.001    | E041 | H3K27ac_Enf | 632  | 0.8894 | 0.0678 | 0.9990 |
| 0.001    | E121 | H3K9ac_Pro  | 441  | 0.8892 | 0.0473 | 0.9946 |
| 0.001    | E059 | H3K4me3_Pr  | 296  | 0.8886 | 0.0318 | 0.9808 |
| 0.001    | E085 | H3K4me1_En  | 947  | 0.8877 | 0.1016 | 1.0000 |
| 1.00E-04 | E085 | H3K4me1_En  | 106  | 0.8876 | 0.1016 | 0.8970 |
| 0.001    | E127 | H3K27ac_Enf | 385  | 0.8873 | 0.0413 | 0.9922 |
| 1.00E-05 | E072 | H3K4me3_Pr  | 4    | 0.8872 | 0.0421 | 0.4719 |
| 0.001    | E111 | H3K9ac_Pro  | 374  | 0.8870 | 0.0401 | 0.9915 |
| 0.001    | E078 | H3K4me3_Pr  | 450  | 0.8870 | 0.0483 | 0.9958 |
| 0.001    | E045 | H3K27ac_Enf | 367  | 0.8869 | 0.0394 | 0.9910 |
| 0.001    | E028 | H3K4me1_En  | 1066 | 0.8868 | 0.1144 | 1.0000 |
| 1.00E-04 | E118 | H3K4me3_Pr  | 26   | 0.8868 | 0.0249 | 0.6938 |
| 0.001    | E018 | H3K4me3_Pr  | 343  | 0.8867 | 0.0368 | 0.9888 |
| 1.00E-04 | E047 | H3K27ac_Enf | 28   | 0.8860 | 0.0268 | 0.7057 |
| 0.001    | E019 | H3K4me3_Pr  | 337  | 0.8855 | 0.0362 | 0.9890 |
| 1.00E-05 | E018 | H3K9ac_Pro  | 6    | 0.8851 | 0.0632 | 0.5213 |
| 1.00E-04 | E053 | H3K4me3_Pr  | 18   | 0.8851 | 0.0173 | 0.6484 |
| 0.001    | E061 | H3K4me3_Pr  | 176  | 0.8844 | 0.0189 | 0.9487 |
| 0.001    | E049 | H3K4me1_En  | 982  | 0.8841 | 0.1054 | 1.0000 |
| 0.001    | E020 | H3K4me1_En  | 1061 | 0.8832 | 0.1139 | 1.0000 |
| 0.001    | E083 | H3K9ac_Pro  | 695  | 0.8829 | 0.0746 | 0.9997 |
| 0.001    | E020 | H3K27ac_Enf | 668  | 0.8827 | 0.0717 | 0.9997 |

|          |      |             |      |        |        |        |
|----------|------|-------------|------|--------|--------|--------|
| 1.00E-04 | E126 | H3K4me1_En  | 64   | 0.8824 | 0.0614 | 0.8356 |
| 0.001    | E126 | H3K27ac_Enf | 312  | 0.8821 | 0.0335 | 0.9883 |
| 0.001    | E078 | H3K27ac_Enf | 484  | 0.8811 | 0.0519 | 0.9981 |
| 0.001    | E019 | H3K27ac_Enf | 226  | 0.8801 | 0.0243 | 0.9741 |
| 0.001    | E062 | H3K27ac_Enf | 211  | 0.8792 | 0.0226 | 0.9707 |
| 0.001    | E107 | H3K9ac_Pro  | 668  | 0.8786 | 0.0717 | 0.9998 |
| 0.001    | E065 | H3K27ac_Enf | 344  | 0.8782 | 0.0369 | 0.9934 |
| 0.001    | E015 | H3K4me1_En  | 1074 | 0.8781 | 0.1153 | 1.0000 |
| 0.001    | E095 | H3K4me1_En  | 809  | 0.8777 | 0.0868 | 1.0000 |
| 0.001    | E076 | H3K9ac_Pro  | 385  | 0.8775 | 0.0413 | 0.9960 |
| 1.00E-05 | E062 | H3K9ac_Pro  | 7    | 0.8772 | 0.0737 | 0.5503 |
| 0.001    | E119 | H3K9ac_Pro  | 324  | 0.8768 | 0.0348 | 0.9925 |
| 0.001    | E023 | H3K4me3_Pri | 477  | 0.8763 | 0.0512 | 0.9987 |
| 0.001    | E015 | H3K4me3_Pri | 306  | 0.8759 | 0.0328 | 0.9913 |
| 1.00E-04 | E022 | H3K27ac_Enf | 42   | 0.8754 | 0.0403 | 0.7887 |
| 0.001    | E050 | H3K4me3_Pri | 258  | 0.8744 | 0.0277 | 0.9861 |
| 0.001    | E116 | H3K4me3_Pri | 290  | 0.8744 | 0.0311 | 0.9904 |
| 0.001    | E065 | H3K4me1_En  | 558  | 0.8743 | 0.0599 | 0.9996 |
| 1.00E-04 | E127 | H3K4me1_En  | 78   | 0.8734 | 0.0748 | 0.8855 |
| 0.001    | E024 | H3K4me1_En  | 1192 | 0.8733 | 0.1279 | 1.0000 |
| 0.001    | E072 | H3K27ac_Enf | 1010 | 0.8725 | 0.1084 | 1.0000 |
| 0.001    | E065 | H3K4me3_Pri | 134  | 0.8722 | 0.0144 | 0.9426 |
| 1.00E-04 | E065 | H3K4me3_Pri | 15   | 0.8721 | 0.0144 | 0.6480 |
| 0.001    | E114 | H3K9ac_Pro  | 359  | 0.8715 | 0.0385 | 0.9964 |
| 0.001    | E027 | H3K4me1_En  | 1174 | 0.8713 | 0.1260 | 1.0000 |
| 1.00E-05 | E052 | H3K4me3_Pri | 3    | 0.8713 | 0.0316 | 0.4528 |
| 0.001    | E114 | H3K27ac_Enf | 406  | 0.8710 | 0.0436 | 0.9981 |
| 0.001    | E026 | H3K27ac_Enf | 457  | 0.8699 | 0.0491 | 0.9990 |
| 1.00E-04 | E129 | H3K4me3_Pri | 35   | 0.8697 | 0.0336 | 0.7740 |
| 0.001    | E012 | H3K4me1_En  | 1145 | 0.8692 | 0.1229 | 1.0000 |
| 0.001    | E023 | H3K4me1_En  | 1079 | 0.8689 | 0.1158 | 1.0000 |
| 0.001    | E084 | H3K4me1_En  | 865  | 0.8685 | 0.0928 | 1.0000 |
| 0.001    | E037 | H3K4me3_Pri | 260  | 0.8685 | 0.0279 | 0.9900 |
| 1.00E-04 | E004 | H3K4me1_En  | 42   | 0.8681 | 0.0403 | 0.8053 |
| 0.001    | E008 | H3K4me3_Pri | 220  | 0.8678 | 0.0236 | 0.9838 |
| 0.001    | E049 | H3K27ac_Enf | 588  | 0.8675 | 0.0631 | 0.9999 |
| 1.00E-04 | E026 | H3K27ac_Enf | 51   | 0.8672 | 0.0489 | 0.8367 |
| 0.001    | E086 | H3K9ac_Pro  | 150  | 0.8669 | 0.0161 | 0.9604 |
| 0.001    | E067 | H3K9ac_Pro  | 611  | 0.8668 | 0.0656 | 0.9999 |
| 1.00E-04 | E088 | H3K4me3_Pri | 36   | 0.8660 | 0.0345 | 0.7864 |
| 0.001    | E035 | H3K4me3_Pri | 173  | 0.8658 | 0.0186 | 0.9721 |
| 0.001    | E016 | H3K4me1_En  | 1048 | 0.8655 | 0.1125 | 1.0000 |
| 0.001    | E057 | H3K4me3_Pri | 198  | 0.8641 | 0.0213 | 0.9815 |

|          |      |             |      |        |        |        |
|----------|------|-------------|------|--------|--------|--------|
| 1.00E-04 | E024 | H3K4me1_En  | 132  | 0.8639 | 0.1266 | 0.9641 |
| 0.001    | E013 | H3K4me1_En  | 1151 | 0.8638 | 0.1235 | 1.0000 |
| 0.001    | E054 | H3K4me1_En  | 641  | 0.8635 | 0.0688 | 1.0000 |
| 0.001    | E110 | H3K9ac_Pro  | 550  | 0.8629 | 0.0590 | 0.9999 |
| 0.001    | E106 | H3K4me3_Pr  | 283  | 0.8619 | 0.0304 | 0.9949 |
| 0.001    | E119 | H3K27ac_Enf | 350  | 0.8618 | 0.0376 | 0.9980 |
| 0.001    | E014 | H3K27ac_Enf | 497  | 0.8617 | 0.0533 | 0.9997 |
| 1.00E-04 | E117 | H3K4me3_Pr  | 41   | 0.8614 | 0.0393 | 0.8162 |
| 1.00E-04 | E077 | H3K9ac_Pro  | 48   | 0.8609 | 0.0460 | 0.8412 |
| 1.00E-05 | E127 | H3K4me1_En  | 7    | 0.8606 | 0.0737 | 0.5726 |
| 1.00E-04 | E054 | H3K4me3_Pr  | 23   | 0.8599 | 0.0221 | 0.7315 |
| 0.001    | E128 | H3K27ac_Enf | 355  | 0.8593 | 0.0381 | 0.9985 |
| 0.001    | E063 | H3K9ac_Pro  | 666  | 0.8573 | 0.0715 | 1.0000 |
| 0.001    | E017 | H3K4me3_Pr  | 135  | 0.8562 | 0.0145 | 0.9649 |
| 0.001    | E009 | H3K4me1_En  | 737  | 0.8562 | 0.0791 | 1.0000 |
| 0.001    | E050 | H3K4me1_En  | 825  | 0.8546 | 0.0885 | 1.0000 |
| 1.00E-04 | E075 | H3K4me3_Pr  | 36   | 0.8538 | 0.0345 | 0.8122 |
| 0.001    | E019 | H3K4me1_En  | 793  | 0.8537 | 0.0851 | 1.0000 |
| 0.001    | E010 | H3K4me3_Pr  | 153  | 0.8534 | 0.0164 | 0.9762 |
| 0.001    | E118 | H3K9ac_Pro  | 249  | 0.8529 | 0.0267 | 0.9950 |
| 1.00E-04 | E020 | H3K9ac_Pro  | 62   | 0.8525 | 0.0594 | 0.8951 |
| 1.00E-05 | E097 | H3K27ac_Enf | 4    | 0.8524 | 0.0421 | 0.5072 |
| 0.001    | E084 | H3K4me3_Pr  | 158  | 0.8516 | 0.0170 | 0.9795 |
| 1.00E-04 | E119 | H3K4me1_En  | 67   | 0.8516 | 0.0642 | 0.9071 |
| 0.001    | E053 | H3K4me1_En  | 729  | 0.8512 | 0.0782 | 1.0000 |
| 0.001    | E026 | H3K9ac_Pro  | 340  | 0.8512 | 0.0365 | 0.9990 |
| 0.001    | E104 | H3K4me3_Pr  | 174  | 0.8511 | 0.0187 | 0.9846 |
| 0.001    | E095 | H3K4me3_Pr  | 135  | 0.8503 | 0.0145 | 0.9711 |
| 1.00E-04 | E017 | H3K4me3_Pr  | 15   | 0.8498 | 0.0144 | 0.6870 |
| 1.00E-05 | E088 | H3K4me1_En  | 11   | 0.8498 | 0.1158 | 0.6559 |
| 1.00E-04 | E080 | H3K4me3_Pr  | 15   | 0.8493 | 0.0144 | 0.6879 |
| 0.001    | E013 | H3K27ac_Enf | 751  | 0.8488 | 0.0806 | 1.0000 |
| 0.001    | E020 | H3K4me3_Pr  | 406  | 0.8483 | 0.0436 | 0.9997 |
| 1.00E-04 | E050 | H3K4me3_Pr  | 28   | 0.8477 | 0.0268 | 0.7857 |
| 0.001    | E052 | H3K4me3_Pr  | 286  | 0.8469 | 0.0307 | 0.9981 |
| 0.001    | E085 | H3K4me3_Pr  | 172  | 0.8469 | 0.0185 | 0.9866 |
| 0.001    | E090 | H3K4me3_Pr  | 136  | 0.8461 | 0.0146 | 0.9754 |
| 0.001    | E102 | H3K9ac_Pro  | 424  | 0.8460 | 0.0455 | 0.9998 |
| 0.001    | E126 | H3K9ac_Pro  | 172  | 0.8458 | 0.0185 | 0.9873 |
| 0.001    | E122 | H3K4me3_Pr  | 152  | 0.8458 | 0.0163 | 0.9818 |
| 1.00E-04 | E008 | H3K4me3_Pr  | 24   | 0.8456 | 0.0230 | 0.7658 |
| 1.00E-05 | E006 | H3K9ac_Pro  | 4    | 0.8448 | 0.0421 | 0.5153 |
| 0.001    | E003 | H3K4me1_En  | 629  | 0.8444 | 0.0675 | 1.0000 |

|          |      |             |     |        |        |        |
|----------|------|-------------|-----|--------|--------|--------|
| 0.001    | E037 | H3K27ac_Enf | 445 | 0.8442 | 0.0478 | 0.9999 |
| 1.00E-04 | E021 | H3K4me3_Pr  | 15  | 0.8441 | 0.0144 | 0.6969 |
| 0.001    | E094 | H3K27ac_Enf | 390 | 0.8440 | 0.0419 | 0.9998 |
| 0.001    | E003 | H3K9ac_Pro  | 298 | 0.8437 | 0.0320 | 0.9988 |
| 0.001    | E014 | H3K9ac_Pro  | 325 | 0.8437 | 0.0349 | 0.9993 |
| 1.00E-04 | E036 | H3K4me3_Pr  | 26  | 0.8436 | 0.0249 | 0.7821 |
| 1.00E-04 | E025 | H3K4me1_En  | 125 | 0.8435 | 0.1198 | 0.9797 |
| 0.001    | E075 | H3K9ac_Pro  | 427 | 0.8431 | 0.0458 | 0.9999 |
| 1.00E-04 | E084 | H3K4me1_En  | 94  | 0.8431 | 0.0901 | 0.9582 |
| 1.00E-04 | E025 | H3K9ac_Pro  | 67  | 0.8426 | 0.0642 | 0.9222 |
| 1.00E-04 | E103 | H3K9ac_Pro  | 38  | 0.8419 | 0.0364 | 0.8441 |
| 0.001    | E003 | H3K4me3_Pr  | 169 | 0.8418 | 0.0181 | 0.9887 |
| 0.001    | E120 | H3K9ac_Pro  | 188 | 0.8411 | 0.0202 | 0.9923 |
| 0.001    | E079 | H3K27ac_Enf | 500 | 0.8394 | 0.0537 | 1.0000 |
| 0.001    | E005 | H3K27ac_Enf | 404 | 0.8391 | 0.0434 | 0.9999 |
| 0.001    | E062 | H3K4me3_Pr  | 163 | 0.8390 | 0.0175 | 0.9887 |
| 0.001    | E003 | H3K27ac_Enf | 456 | 0.8377 | 0.0489 | 1.0000 |
| 0.001    | E099 | H3K27ac_Enf | 437 | 0.8371 | 0.0469 | 1.0000 |
| 0.001    | E080 | H3K4me3_Pr  | 132 | 0.8367 | 0.0142 | 0.9809 |
| 1.00E-04 | E085 | H3K4me3_Pr  | 19  | 0.8357 | 0.0182 | 0.7479 |
| 0.001    | E013 | H3K4me3_Pr  | 159 | 0.8356 | 0.0171 | 0.9895 |
| 0.001    | E083 | H3K4me1_En  | 880 | 0.8355 | 0.0945 | 1.0000 |
| 1.00E-04 | E103 | H3K4me1_En  | 64  | 0.8354 | 0.0614 | 0.9274 |
| 0.001    | E016 | H3K4me3_Pr  | 266 | 0.8352 | 0.0285 | 0.9988 |
| 1.00E-04 | E019 | H3K27ac_Enf | 24  | 0.8349 | 0.0230 | 0.7861 |
| 0.001    | E021 | H3K4me1_En  | 577 | 0.8344 | 0.0619 | 1.0000 |
| 1.00E-04 | E090 | H3K4me3_Pr  | 15  | 0.8336 | 0.0144 | 0.7149 |
| 0.001    | E118 | H3K4me1_En  | 636 | 0.8328 | 0.0683 | 1.0000 |
| 1.00E-04 | E089 | H3K4me3_Pr  | 14  | 0.8325 | 0.0134 | 0.7061 |
| 0.001    | E061 | H3K27ac_Enf | 698 | 0.8324 | 0.0749 | 1.0000 |
| 0.001    | E021 | H3K4me3_Pr  | 132 | 0.8315 | 0.0142 | 0.9842 |
| 0.001    | E022 | H3K27ac_Enf | 356 | 0.8307 | 0.0382 | 0.9999 |
| 0.001    | E011 | H3K27ac_Enf | 746 | 0.8306 | 0.0801 | 1.0000 |
| 1.00E-04 | E033 | H3K4me1_En  | 39  | 0.8298 | 0.0374 | 0.8699 |
| 0.001    | E049 | H3K9ac_Pro  | 494 | 0.8283 | 0.0530 | 1.0000 |
| 1.00E-05 | E006 | H3K27ac_Enf | 4   | 0.8279 | 0.0421 | 0.5334 |
| 0.001    | E019 | H3K9ac_Pro  | 359 | 0.8274 | 0.0385 | 0.9999 |
| 1.00E-04 | E050 | H3K27ac_Enf | 61  | 0.8273 | 0.0585 | 0.9333 |
| 0.001    | E112 | H3K4me3_Pr  | 152 | 0.8269 | 0.0163 | 0.9916 |
| 0.001    | E050 | H3K27ac_Enf | 544 | 0.8259 | 0.0584 | 1.0000 |
| 0.001    | E015 | H3K27ac_Enf | 549 | 0.8258 | 0.0589 | 1.0000 |
| 1.00E-04 | E102 | H3K27ac_Enf | 55  | 0.8258 | 0.0527 | 0.9231 |
| 0.001    | E118 | H3K4me3_Pr  | 216 | 0.8247 | 0.0232 | 0.9983 |

|          |      |             |     |        |        |        |
|----------|------|-------------|-----|--------|--------|--------|
| 0.001    | E048 | H3K4me3_Pr  | 267 | 0.8243 | 0.0287 | 0.9995 |
| 1.00E-05 | E102 | H3K27ac_Enf | 5   | 0.8242 | 0.0526 | 0.5705 |
| 1.00E-05 | E096 | H3K4me3_Pr  | 3   | 0.8236 | 0.0316 | 0.4964 |
| 0.001    | E128 | H3K4me3_Pr  | 130 | 0.8230 | 0.0140 | 0.9880 |
| 1.00E-05 | E127 | H3K4me3_Pr  | 3   | 0.8224 | 0.0316 | 0.4976 |
| 0.001    | E087 | H3K4me3_Pr  | 119 | 0.8221 | 0.0128 | 0.9849 |
| 1.00E-04 | E128 | H3K27ac_Enf | 38  | 0.8217 | 0.0364 | 0.8800 |
| 0.001    | E048 | H3K27ac_Enf | 336 | 0.8216 | 0.0361 | 0.9999 |
| 0.001    | E062 | H3K9ac_Pro  | 642 | 0.8203 | 0.0689 | 1.0000 |
| 1.00E-04 | E017 | H3K27ac_Enf | 49  | 0.8198 | 0.0470 | 0.9174 |
| 1.00E-04 | E091 | H3K4me3_Pr  | 13  | 0.8197 | 0.0125 | 0.7157 |
| 1.00E-04 | E001 | H3K4me1_En  | 120 | 0.8194 | 0.1151 | 0.9909 |
| 0.001    | E012 | H3K4me3_Pr  | 192 | 0.8189 | 0.0206 | 0.9978 |
| 1.00E-05 | E061 | H3K27ac_Enf | 7   | 0.8187 | 0.0737 | 0.6303 |
| 1.00E-04 | E015 | H3K4me1_En  | 112 | 0.8179 | 0.1074 | 0.9890 |
| 0.001    | E118 | H3K27ac_Enf | 269 | 0.8175 | 0.0289 | 0.9997 |
| 1.00E-05 | E097 | H3K4me1_En  | 7   | 0.8173 | 0.0737 | 0.6323 |
| 0.001    | E016 | H3K27ac_Enf | 433 | 0.8151 | 0.0465 | 1.0000 |
| 0.001    | E121 | H3K4me3_Pr  | 296 | 0.8151 | 0.0318 | 0.9999 |
| 1.00E-05 | E025 | H3K4me1_En  | 11  | 0.8149 | 0.1158 | 0.7134 |
| 1.00E-04 | E041 | H3K4me3_Pr  | 35  | 0.8142 | 0.0336 | 0.8804 |
| 0.001    | E128 | H3K9ac_Pro  | 155 | 0.8139 | 0.0166 | 0.9957 |
| 1.00E-05 | E074 | H3K9ac_Pro  | 4   | 0.8133 | 0.0421 | 0.5494 |
| 0.001    | E052 | H3K9ac_Pro  | 372 | 0.8133 | 0.0399 | 1.0000 |
| 0.001    | E093 | H3K27ac_Enf | 406 | 0.8096 | 0.0436 | 1.0000 |
| 1.00E-04 | E101 | H3K9ac_Pro  | 46  | 0.8091 | 0.0441 | 0.9243 |
| 1.00E-04 | E101 | H3K27ac_Enf | 61  | 0.8087 | 0.0585 | 0.9553 |
| 1.00E-04 | E061 | H3K4me3_Pr  | 18  | 0.8080 | 0.0173 | 0.7875 |
| 0.001    | E029 | H3K4me3_Pr  | 94  | 0.8067 | 0.0101 | 0.9824 |
| 1.00E-05 | E007 | H3K4me3_Pr  | 3   | 0.8066 | 0.0316 | 0.5129 |
| 1.00E-04 | E014 | H3K4me1_En  | 114 | 0.8061 | 0.1093 | 0.9937 |
| 0.001    | E103 | H3K9ac_Pro  | 325 | 0.8060 | 0.0349 | 1.0000 |
| 1.00E-05 | E066 | H3K4me1_En  | 8   | 0.8043 | 0.0842 | 0.6735 |
| 1.00E-04 | E003 | H3K4me1_En  | 67  | 0.8034 | 0.0642 | 0.9682 |
| 0.001    | E012 | H3K27ac_Enf | 713 | 0.8033 | 0.0765 | 1.0000 |
| 1.00E-04 | E019 | H3K9ac_Pro  | 39  | 0.8029 | 0.0374 | 0.9119 |
| 1.00E-04 | E005 | H3K9ac_Pro  | 24  | 0.8028 | 0.0230 | 0.8419 |
| 0.001    | E127 | H3K9ac_Pro  | 310 | 0.8027 | 0.0333 | 1.0000 |
| 1.00E-04 | E102 | H3K9ac_Pro  | 45  | 0.8021 | 0.0431 | 0.9308 |
| 0.001    | E022 | H3K4me3_Pr  | 205 | 0.8013 | 0.0220 | 0.9995 |
| 1.00E-04 | E012 | H3K4me3_Pr  | 21  | 0.8001 | 0.0201 | 0.8254 |
| 1.00E-04 | E125 | H3K27ac_Enf | 48  | 0.7993 | 0.0460 | 0.9413 |
| 1.00E-04 | E009 | H3K4me1_En  | 77  | 0.7991 | 0.0738 | 0.9806 |

|          |      |             |     |        |        |        |
|----------|------|-------------|-----|--------|--------|--------|
| 0.001    | E028 | H3K4me3_Pr  | 192 | 0.7951 | 0.0206 | 0.9995 |
| 0.001    | E002 | H3K9ac_Pro  | 57  | 0.7937 | 0.0061 | 0.9588 |
| 0.001    | E004 | H3K9ac_Pro  | 277 | 0.7936 | 0.0297 | 1.0000 |
| 0.001    | E092 | H3K4me3_Pr  | 136 | 0.7917 | 0.0146 | 0.9975 |
| 0.001    | E070 | H3K4me1_En  | 455 | 0.7911 | 0.0488 | 1.0000 |
| 0.001    | E016 | H3K9ac_Pro  | 345 | 0.7899 | 0.0370 | 1.0000 |
| 1.00E-05 | E023 | H3K4me1_En  | 10  | 0.7898 | 0.1053 | 0.7358 |
| 0.001    | E008 | H3K4me1_En  | 358 | 0.7885 | 0.0384 | 1.0000 |
| 1.00E-05 | E059 | H3K4me1_En  | 5   | 0.7884 | 0.0526 | 0.6146 |
| 1.00E-05 | E124 | H3K9ac_Pro  | 5   | 0.7878 | 0.0526 | 0.6154 |
| 1.00E-05 | E039 | H3K27ac_Enf | 4   | 0.7872 | 0.0421 | 0.5788 |
| 1.00E-04 | E114 | H3K27ac_Enf | 41  | 0.7857 | 0.0393 | 0.9393 |
| 0.001    | E007 | H3K27ac_Enf | 235 | 0.7856 | 0.0252 | 0.9999 |
| 1.00E-04 | E117 | H3K4me1_En  | 74  | 0.7842 | 0.0709 | 0.9862 |
| 1.00E-04 | E126 | H3K27ac_Enf | 31  | 0.7830 | 0.0297 | 0.9086 |
| 0.001    | E005 | H3K9ac_Pro  | 209 | 0.7827 | 0.0224 | 0.9999 |
| 0.001    | E093 | H3K4me3_Pr  | 150 | 0.7821 | 0.0161 | 0.9991 |
| 1.00E-05 | E046 | H3K4me1_En  | 6   | 0.7810 | 0.0632 | 0.6557 |
| 1.00E-04 | E114 | H3K9ac_Pro  | 36  | 0.7806 | 0.0345 | 0.9302 |
| 1.00E-04 | E041 | H3K27ac_Enf | 62  | 0.7794 | 0.0594 | 0.9795 |
| 1.00E-04 | E020 | H3K27ac_Enf | 66  | 0.7791 | 0.0633 | 0.9831 |
| 0.001    | E020 | H3K9ac_Pro  | 506 | 0.7789 | 0.0543 | 1.0000 |
| 0.001    | E119 | H3K4me3_Pr  | 140 | 0.7781 | 0.0150 | 0.9989 |
| 1.00E-04 | E006 | H3K27ac_Enf | 41  | 0.7729 | 0.0393 | 0.9522 |
| 1.00E-05 | E091 | H3K4me1_En  | 7   | 0.7710 | 0.0737 | 0.6973 |
| 1.00E-05 | E069 | H3K4me1_En  | 9   | 0.7709 | 0.0947 | 0.7446 |
| 1.00E-04 | E074 | H3K4me3_Pr  | 39  | 0.7708 | 0.0374 | 0.9493 |
| 1.00E-05 | E098 | H3K4me1_En  | 8   | 0.7690 | 0.0842 | 0.7251 |
| 1.00E-04 | E103 | H3K27ac_Enf | 49  | 0.7674 | 0.0470 | 0.9717 |
| 1.00E-04 | E097 | H3K4me3_Pr  | 16  | 0.7672 | 0.0153 | 0.8320 |
| 1.00E-04 | E015 | H3K27ac_Enf | 57  | 0.7659 | 0.0547 | 0.9820 |
| 0.001    | E058 | H3K27ac_Enf | 605 | 0.7657 | 0.0649 | 1.0000 |
| 1.00E-04 | E026 | H3K9ac_Pro  | 34  | 0.7603 | 0.0326 | 0.9452 |
| 1.00E-04 | E010 | H3K4me1_En  | 80  | 0.7596 | 0.0767 | 0.9958 |
| 1.00E-04 | E003 | H3K4me3_Pr  | 17  | 0.7564 | 0.0163 | 0.8571 |
| 1.00E-05 | E109 | H3K27ac_Enf | 5   | 0.7562 | 0.0526 | 0.6553 |
| 1.00E-05 | E020 | H3K9ac_Pro  | 5   | 0.7548 | 0.0526 | 0.6571 |
| 1.00E-04 | E013 | H3K4me3_Pr  | 16  | 0.7511 | 0.0153 | 0.8548 |
| 1.00E-04 | E119 | H3K9ac_Pro  | 31  | 0.7494 | 0.0297 | 0.9459 |
| 1.00E-05 | E106 | H3K4me1_En  | 4   | 0.7488 | 0.0421 | 0.6237 |
| 1.00E-04 | E010 | H3K4me3_Pr  | 15  | 0.7474 | 0.0144 | 0.8496 |
| 1.00E-04 | E002 | H3K9ac_Pro  | 6   | 0.7464 | 0.0058 | 0.6923 |
| 1.00E-04 | E054 | H3K4me1_En  | 62  | 0.7461 | 0.0594 | 0.9926 |

|          |      |             |    |        |        |        |
|----------|------|-------------|----|--------|--------|--------|
| 1.00E-05 | E038 | H3K9ac_Pro  | 5  | 0.7456 | 0.0526 | 0.6688 |
| 1.00E-04 | E015 | H3K4me3_Pr  | 29 | 0.7415 | 0.0278 | 0.9461 |
| 1.00E-04 | E053 | H3K4me1_En  | 71 | 0.7405 | 0.0681 | 0.9966 |
| 1.00E-04 | E028 | H3K4me3_Pr  | 20 | 0.7399 | 0.0192 | 0.9025 |
| 1.00E-04 | E078 | H3K4me3_Pr  | 42 | 0.7395 | 0.0403 | 0.9781 |
| 1.00E-05 | E026 | H3K9ac_Pro  | 3  | 0.7366 | 0.0316 | 0.5852 |
| 1.00E-04 | E062 | H3K4me3_Pr  | 16 | 0.7357 | 0.0153 | 0.8751 |
| 1.00E-04 | E125 | H3K9ac_Pro  | 41 | 0.7349 | 0.0393 | 0.9790 |
| 1.00E-04 | E079 | H3K27ac_Enf | 49 | 0.7348 | 0.0470 | 0.9879 |
| 1.00E-04 | E081 | H3K4me3_Pr  | 8  | 0.7344 | 0.0077 | 0.7598 |
| 1.00E-04 | E084 | H3K27ac_Enf | 43 | 0.7342 | 0.0412 | 0.9820 |
| 1.00E-04 | E105 | H3K4me3_Pr  | 20 | 0.7328 | 0.0192 | 0.9107 |
| 1.00E-04 | E020 | H3K4me1_En  | 98 | 0.7287 | 0.0940 | 0.9997 |
| 1.00E-04 | E092 | H3K4me3_Pr  | 14 | 0.7280 | 0.0134 | 0.8640 |
| 1.00E-05 | E101 | H3K27ac_Enf | 5  | 0.7278 | 0.0526 | 0.6917 |
| 1.00E-05 | E023 | H3K4me3_Pr  | 4  | 0.7207 | 0.0421 | 0.6574 |
| 1.00E-04 | E038 | H3K9ac_Pro  | 53 | 0.7199 | 0.0508 | 0.9943 |
| 1.00E-04 | E103 | H3K4me3_Pr  | 35 | 0.7192 | 0.0336 | 0.9774 |
| 1.00E-05 | E068 | H3K27ac_Enf | 8  | 0.7167 | 0.0842 | 0.7988 |
| 1.00E-04 | E014 | H3K27ac_Enf | 46 | 0.7125 | 0.0441 | 0.9922 |
| 1.00E-04 | E045 | H3K27ac_Enf | 33 | 0.7124 | 0.0316 | 0.9772 |
| 1.00E-05 | E021 | H3K4me1_En  | 5  | 0.7091 | 0.0526 | 0.7158 |
| 1.00E-04 | E016 | H3K27ac_Enf | 42 | 0.7063 | 0.0403 | 0.9909 |
| 1.00E-04 | E119 | H3K27ac_Enf | 32 | 0.7038 | 0.0307 | 0.9795 |
| 1.00E-04 | E099 | H3K27ac_Enf | 41 | 0.7016 | 0.0393 | 0.9913 |
| 1.00E-05 | E069 | H3K4me3_Pr  | 3  | 0.7012 | 0.0316 | 0.6243 |
| 1.00E-04 | E016 | H3K4me1_En  | 95 | 0.7009 | 0.0911 | 0.9999 |
| 1.00E-05 | E108 | H3K4me3_Pr  | 3  | 0.7002 | 0.0316 | 0.6254 |
| 1.00E-04 | E001 | H3K9ac_Pro  | 28 | 0.6995 | 0.0268 | 0.9732 |
| 1.00E-04 | E104 | H3K4me3_Pr  | 16 | 0.6991 | 0.0153 | 0.9168 |
| 1.00E-04 | E093 | H3K4me3_Pr  | 15 | 0.6986 | 0.0144 | 0.9086 |
| 1.00E-04 | E022 | H3K4me3_Pr  | 20 | 0.6983 | 0.0192 | 0.9443 |
| 1.00E-05 | E023 | H3K9ac_Pro  | 5  | 0.6981 | 0.0526 | 0.7299 |
| 1.00E-04 | E031 | H3K4me3_Pr  | 13 | 0.6968 | 0.0125 | 0.8901 |
| 1.00E-04 | E014 | H3K9ac_Pro  | 30 | 0.6957 | 0.0288 | 0.9795 |
| 1.00E-04 | E123 | H3K4me3_Pr  | 20 | 0.6952 | 0.0192 | 0.9468 |
| 1.00E-05 | E073 | H3K27ac_Enf | 8  | 0.6928 | 0.0842 | 0.8302 |
| 1.00E-04 | E076 | H3K4me3_Pr  | 39 | 0.6920 | 0.0374 | 0.9921 |
| 1.00E-04 | E042 | H3K27ac_Enf | 31 | 0.6876 | 0.0297 | 0.9846 |
| 1.00E-04 | E007 | H3K27ac_Enf | 23 | 0.6868 | 0.0221 | 0.9658 |
| 1.00E-04 | E114 | H3K4me3_Pr  | 33 | 0.6851 | 0.0316 | 0.9881 |
| 1.00E-05 | E009 | H3K4me1_En  | 6  | 0.6836 | 0.0632 | 0.7853 |
| 1.00E-05 | E072 | H3K27ac_Enf | 8  | 0.6778 | 0.0842 | 0.8490 |



|          |      |             |    |        |        |        |
|----------|------|-------------|----|--------|--------|--------|
| 1.00E-04 | E093 | H3K27ac_Enh | 38 | 0.6769 | 0.0364 | 0.9944 |
| 1.00E-05 | E103 | H3K4me3_Pri | 3  | 0.6768 | 0.0316 | 0.6521 |
| 1.00E-04 | E044 | H3K4me3_Pri | 23 | 0.6764 | 0.0221 | 0.9718 |
| 1.00E-05 | E067 | H3K27ac_Enh | 7  | 0.6749 | 0.0737 | 0.8268 |
| 1.00E-04 | E033 | H3K4me3_Pri | 16 | 0.6715 | 0.0153 | 0.9419 |
| 1.00E-04 | E117 | H3K9ac_Pro  | 34 | 0.6709 | 0.0326 | 0.9927 |
| 1.00E-04 | E123 | H3K4me1_Enh | 48 | 0.6702 | 0.0460 | 0.9985 |
| 1.00E-04 | E008 | H3K4me1_Enh | 34 | 0.6689 | 0.0326 | 0.9931 |
| 1.00E-04 | E117 | H3K27ac_Enh | 34 | 0.6653 | 0.0326 | 0.9938 |
| 1.00E-05 | E079 | H3K27ac_Enh | 4  | 0.6585 | 0.0421 | 0.7337 |
| 1.00E-05 | E049 | H3K9ac_Pro  | 4  | 0.6578 | 0.0421 | 0.7346 |
| 1.00E-04 | E003 | H3K9ac_Pro  | 26 | 0.6576 | 0.0249 | 0.9867 |
| 1.00E-04 | E123 | H3K9ac_Pro  | 19 | 0.6570 | 0.0182 | 0.9681 |
| 1.00E-05 | E086 | H3K4me1_Enh | 3  | 0.6567 | 0.0316 | 0.6754 |
| 1.00E-04 | E021 | H3K27ac_Enh | 20 | 0.6554 | 0.0192 | 0.9728 |
| 1.00E-04 | E043 | H3K4me3_Pri | 22 | 0.6553 | 0.0211 | 0.9790 |
| 1.00E-04 | E109 | H3K4me3_Pri | 19 | 0.6553 | 0.0182 | 0.9691 |
| 1.00E-05 | E020 | H3K4me1_Enh | 8  | 0.6531 | 0.0842 | 0.8778 |
| 1.00E-05 | E080 | H3K27ac_Enh | 5  | 0.6510 | 0.0526 | 0.7892 |
| 1.00E-05 | E074 | H3K4me3_Pri | 3  | 0.6510 | 0.0316 | 0.6822 |
| 1.00E-05 | E078 | H3K4me1_Enh | 7  | 0.6495 | 0.0737 | 0.8575 |
| 1.00E-05 | E071 | H3K4me1_Enh | 9  | 0.6480 | 0.0947 | 0.9035 |
| 1.00E-04 | E122 | H3K4me3_Pri | 13 | 0.6462 | 0.0125 | 0.9388 |
| 1.00E-04 | E019 | H3K4me1_Enh | 67 | 0.6443 | 0.0642 | 1.0000 |
| 1.00E-04 | E070 | H3K4me3_Pri | 17 | 0.6429 | 0.0163 | 0.9673 |
| 1.00E-04 | E034 | H3K4me3_Pri | 14 | 0.6405 | 0.0134 | 0.9511 |
| 1.00E-04 | E070 | H3K4me1_Enh | 41 | 0.6368 | 0.0393 | 0.9991 |
| 1.00E-05 | E066 | H3K4me3_Pri | 3  | 0.6360 | 0.0316 | 0.6998 |
| 1.00E-04 | E006 | H3K9ac_Pro  | 33 | 0.6348 | 0.0316 | 0.9973 |
| 1.00E-04 | E048 | H3K4me3_Pri | 23 | 0.6343 | 0.0221 | 0.9885 |
| 1.00E-04 | E021 | H3K4me1_Enh | 49 | 0.6330 | 0.0470 | 0.9998 |
| 1.00E-05 | E073 | H3K9ac_Pro  | 3  | 0.6317 | 0.0316 | 0.7049 |
| 1.00E-04 | E040 | H3K4me3_Pri | 27 | 0.6306 | 0.0259 | 0.9942 |
| 1.00E-04 | E037 | H3K4me3_Pri | 21 | 0.6266 | 0.0201 | 0.9869 |
| 1.00E-04 | E035 | H3K4me3_Pri | 14 | 0.6259 | 0.0134 | 0.9607 |
| 1.00E-04 | E106 | H3K4me3_Pri | 23 | 0.6257 | 0.0221 | 0.9907 |
| 1.00E-05 | E051 | H3K4me1_Enh | 5  | 0.6238 | 0.0526 | 0.8222 |
| 1.00E-04 | E057 | H3K4me3_Pri | 16 | 0.6238 | 0.0153 | 0.9726 |
| 1.00E-04 | E018 | H3K4me3_Pri | 27 | 0.6235 | 0.0259 | 0.9953 |
| 1.00E-05 | E032 | H3K4me1_Enh | 5  | 0.6227 | 0.0526 | 0.8235 |
| 1.00E-04 | E024 | H3K4me3_Pri | 19 | 0.6221 | 0.0182 | 0.9837 |
| 1.00E-04 | E128 | H3K4me3_Pri | 11 | 0.6220 | 0.0105 | 0.9384 |
| 1.00E-05 | E014 | H3K4me1_Enh | 8  | 0.6211 | 0.0842 | 0.9110 |

|          |      |             |    |        |        |        |
|----------|------|-------------|----|--------|--------|--------|
| 1.00E-04 | E123 | H3K27ac_Enf | 19 | 0.6197 | 0.0182 | 0.9846 |
| 1.00E-05 | E049 | H3K4me1_En  | 7  | 0.6181 | 0.0737 | 0.8919 |
| 1.00E-04 | E004 | H3K9ac_Pro  | 24 | 0.6142 | 0.0230 | 0.9941 |
| 1.00E-05 | E074 | H3K4me1_En  | 7  | 0.6123 | 0.0737 | 0.8977 |
| 1.00E-05 | E005 | H3K27ac_Enf | 3  | 0.6111 | 0.0316 | 0.7294 |
| 1.00E-04 | E019 | H3K4me3_Pri | 26 | 0.6103 | 0.0249 | 0.9963 |
| 1.00E-04 | E001 | H3K4me3_Pri | 30 | 0.6101 | 0.0288 | 0.9981 |
| 1.00E-04 | E037 | H3K27ac_Enf | 36 | 0.6100 | 0.0345 | 0.9993 |
| 1.00E-05 | E050 | H3K4me1_En  | 6  | 0.6095 | 0.0632 | 0.8735 |
| 1.00E-04 | E047 | H3K4me3_Pri | 17 | 0.6039 | 0.0163 | 0.9843 |
| 1.00E-05 | E057 | H3K4me1_En  | 5  | 0.6022 | 0.0526 | 0.8471 |
| 1.00E-05 | E071 | H3K4me3_Pri | 3  | 0.5999 | 0.0316 | 0.7426 |
| 1.00E-04 | E127 | H3K27ac_Enf | 29 | 0.5970 | 0.0278 | 0.9986 |
| 1.00E-05 | E125 | H3K9ac_Pro  | 3  | 0.5904 | 0.0316 | 0.7540 |
| 1.00E-04 | E016 | H3K4me3_Pri | 21 | 0.5890 | 0.0201 | 0.9949 |
| 1.00E-04 | E099 | H3K4me3_Pri | 17 | 0.5843 | 0.0163 | 0.9898 |
| 1.00E-04 | E112 | H3K4me3_Pri | 12 | 0.5831 | 0.0115 | 0.9713 |
| 1.00E-05 | E117 | H3K4me1_En  | 5  | 0.5817 | 0.0526 | 0.8695 |
| 1.00E-05 | E068 | H3K9ac_Pro  | 5  | 0.5813 | 0.0526 | 0.8699 |
| 1.00E-05 | E078 | H3K4me3_Pri | 3  | 0.5799 | 0.0316 | 0.7663 |
| 1.00E-05 | E101 | H3K9ac_Pro  | 3  | 0.5793 | 0.0316 | 0.7671 |
| 1.00E-05 | E049 | H3K27ac_Enf | 4  | 0.5788 | 0.0421 | 0.8290 |
| 1.00E-04 | E058 | H3K4me3_Pri | 17 | 0.5783 | 0.0163 | 0.9911 |
| 1.00E-04 | E084 | H3K4me3_Pri | 12 | 0.5778 | 0.0115 | 0.9737 |
| 1.00E-04 | E058 | H3K27ac_Enf | 51 | 0.5766 | 0.0489 | 1.0000 |
| 1.00E-04 | E046 | H3K27ac_Enf | 20 | 0.5696 | 0.0192 | 0.9964 |
| 1.00E-04 | E063 | H3K4me3_Pri | 28 | 0.5691 | 0.0268 | 0.9994 |
| 1.00E-04 | E038 | H3K4me3_Pri | 20 | 0.5691 | 0.0192 | 0.9964 |
| 1.00E-04 | E098 | H3K4me3_Pri | 14 | 0.5689 | 0.0134 | 0.9859 |
| 1.00E-04 | E128 | H3K9ac_Pro  | 12 | 0.5629 | 0.0115 | 0.9799 |
| 1.00E-04 | E020 | H3K4me3_Pri | 30 | 0.5600 | 0.0288 | 0.9998 |
| 1.00E-04 | E100 | H3K4me3_Pri | 12 | 0.5572 | 0.0115 | 0.9819 |
| 1.00E-05 | E025 | H3K4me3_Pri | 3  | 0.5526 | 0.0316 | 0.7984 |
| 1.00E-05 | E025 | H3K9ac_Pro  | 4  | 0.5523 | 0.0421 | 0.8584 |
| 1.00E-04 | E014 | H3K4me3_Pri | 26 | 0.5504 | 0.0249 | 0.9996 |
| 1.00E-04 | E116 | H3K4me1_En  | 38 | 0.5486 | 0.0364 | 1.0000 |
| 1.00E-04 | E116 | H3K9ac_Pro  | 16 | 0.5369 | 0.0153 | 0.9961 |
| 1.00E-04 | E029 | H3K4me3_Pri | 7  | 0.5366 | 0.0067 | 0.9483 |
| 1.00E-05 | E019 | H3K4me1_En  | 5  | 0.5279 | 0.0526 | 0.9212 |
| 1.00E-05 | E001 | H3K4me1_En  | 7  | 0.5248 | 0.0737 | 0.9653 |
| 1.00E-04 | E045 | H3K4me3_Pri | 19 | 0.5235 | 0.0182 | 0.9990 |
| 1.00E-04 | E046 | H3K4me3_Pri | 9  | 0.5146 | 0.0086 | 0.9805 |
| 1.00E-05 | E124 | H3K27ac_Enf | 5  | 0.5130 | 0.0526 | 0.9332 |

|          |      |             |    |        |        |        |
|----------|------|-------------|----|--------|--------|--------|
| 1.00E-05 | E014 | H3K27ac_Enr | 3  | 0.5101 | 0.0316 | 0.8465 |
| 1.00E-04 | E048 | H3K27ac_Enr | 23 | 0.5024 | 0.0221 | 0.9999 |
| 1.00E-05 | E058 | H3K27ac_Enr | 4  | 0.4965 | 0.0421 | 0.9133 |
| 1.00E-05 | E072 | H3K9ac_Pro  | 4  | 0.4955 | 0.0421 | 0.9141 |
| 1.00E-05 | E108 | H3K9ac_Pro  | 3  | 0.4938 | 0.0316 | 0.8640 |
| 1.00E-04 | E094 | H3K4me3_Pr  | 21 | 0.4902 | 0.0201 | 0.9999 |
| 1.00E-04 | E042 | H3K4me3_Pr  | 19 | 0.4897 | 0.0182 | 0.9997 |
| 1.00E-04 | E127 | H3K9ac_Pro  | 21 | 0.4858 | 0.0201 | 0.9999 |
| 1.00E-04 | E116 | H3K4me3_Pr  | 18 | 0.4848 | 0.0173 | 0.9997 |
| 1.00E-04 | E003 | H3K27ac_Enr | 29 | 0.4759 | 0.0278 | 1.0000 |
| 1.00E-05 | E099 | H3K4me1_En  | 5  | 0.4747 | 0.0526 | 0.9594 |
| 1.00E-04 | E040 | H3K27ac_Enr | 22 | 0.4746 | 0.0211 | 1.0000 |
| 1.00E-04 | E116 | H3K27ac_Enr | 21 | 0.4695 | 0.0201 | 1.0000 |
| 1.00E-05 | E018 | H3K4me1_En  | 6  | 0.4689 | 0.0632 | 0.9783 |
| 1.00E-04 | E095 | H3K4me3_Pr  | 8  | 0.4501 | 0.0077 | 0.9923 |
| 1.00E-05 | E013 | H3K4me1_En  | 6  | 0.4416 | 0.0632 | 0.9873 |
| 1.00E-05 | E087 | H3K4me1_En  | 4  | 0.4350 | 0.0421 | 0.9589 |
| 1.00E-05 | E011 | H3K4me1_En  | 6  | 0.4345 | 0.0632 | 0.9892 |
| 1.00E-05 | E066 | H3K27ac_Enr | 3  | 0.4233 | 0.0316 | 0.9303 |
| 1.00E-05 | E119 | H3K4me1_En  | 3  | 0.4187 | 0.0316 | 0.9340 |
| 1.00E-05 | E016 | H3K4me1_En  | 5  | 0.4050 | 0.0526 | 0.9883 |
| 1.00E-05 | E003 | H3K4me1_En  | 3  | 0.3950 | 0.0316 | 0.9512 |
| 1.00E-05 | E020 | H3K27ac_Enr | 3  | 0.3888 | 0.0316 | 0.9552 |
| 1.00E-05 | E107 | H3K9ac_Pro  | 3  | 0.3870 | 0.0316 | 0.9564 |
| 1.00E-05 | E006 | H3K4me1_En  | 4  | 0.3864 | 0.0421 | 0.9819 |
| 1.00E-05 | E114 | H3K4me1_En  | 4  | 0.3802 | 0.0421 | 0.9840 |
| 1.00E-05 | E069 | H3K27ac_Enr | 4  | 0.3640 | 0.0421 | 0.9887 |
| 1.00E-05 | E036 | H3K4me1_En  | 3  | 0.3639 | 0.0316 | 0.9696 |
| 1.00E-05 | E124 | H3K4me1_En  | 3  | 0.3587 | 0.0316 | 0.9722 |
| 1.00E-05 | E015 | H3K4me1_En  | 4  | 0.3207 | 0.0421 | 0.9965 |
| 1.00E-05 | E071 | H3K27ac_Enr | 3  | 0.2985 | 0.0316 | 0.9926 |

| q-value | Roadmap Gr    | Roadmap Epi    | Anatomy      |
|---------|---------------|----------------|--------------|
| 0.0010  | Brain         | Fetal Brain Fe | BRAIN        |
| 0.0767  | Other         | Fetal Lung     | LUNG         |
| 0.0011  | Other         | Spleen         | SPLEEN       |
| 0.0367  | ESC           | ES-WA7 Cells   | ESC          |
| 0.0417  | Blood & T-cel | Primary T cell | BLOOD        |
| 0.0146  | Brain         | Fetal Brain M  | BRAIN        |
| 0.1548  | Brain         | Brain_Dorsol   | BRAIN        |
| 0.0864  | Brain         | Brain Germin   | BRAIN        |
| 0.0000  | Heart         | Right Atrium   | HEART        |
| 0.0000  | Other         | Spleen         | SPLEEN       |
| 0.0342  | Blood & T-cel | Primary T CD8  | BLOOD        |
| 0.0242  | Digestive     | Esophagus      | GI_ESOPHAGUS |
| 0.1886  | ESC           | H9 Cells       | ESC          |
| 0.0363  | Digestive     | Gastric        | GI_STOMACH   |
| 0.2119  | Blood & T-cel | Primary T hel  | BLOOD        |
| 0.0787  | Blood & T-cel | Primary T reg  | BLOOD        |
| 0.1579  | ESC           | H9 Cells       | ESC          |
| 0.0612  | Heart         | Right Atrium   | HEART        |
| 0.1280  | Sm. Muscle    | Rectal Smoot   | GI_RECTUM    |
| 0.0740  | Blood & T-cel | Primary T hel  | BLOOD        |
| 0.5475  | Brain         | Fetal Brain Fe | BRAIN        |
| 0.1054  | Blood & T-cel | Primary T hel  | BLOOD        |
| 0.0000  | Other         | Liver          | LIVER        |
| 0.0731  | ES-deriv      | H1 Derived N   | ESC_DERIVED  |
| 0.1165  | Blood & T-cel | Primary T hel  | BLOOD        |
| 0.0000  | Other         | Lung           | LUNG         |
| 0.1161  | Blood & T-cel | Primary T cell | BLOOD        |
| 0.0882  | Blood & T-cel | Primary T hel  | BLOOD        |
| 0.1403  | Blood & T-cel | Primary T hel  | BLOOD        |
| 0.3289  | Thymus        | Thymus         | THYMUS       |
| 0.0579  | Heart         | Right Ventricl | HEART        |
| 0.3407  | Epithelial    | Foreskin Mel   | SKIN         |
| 0.3997  | Sm. Muscle    | Stomach Smo    | GI_STOMACH   |
| 0.1685  | Blood & T-cel | Primary T hel  | BLOOD        |
| 0.1915  | Blood & T-cel | Primary T CD8  | BLOOD        |
| 0.1105  | Epithelial    | Foreskin Fibr  | SKIN         |
| 0.3846  | ENCODE2012    | HUVEC Umbil    | VASCULAR     |
| 0.5369  | Sm. Muscle    | Stomach Smo    | GI_STOMACH   |
| 0.2892  | Sm. Muscle    | Colon Smoot    | GI_COLON     |
| 0.2376  | Blood & T-cel | Primary T hel  | BLOOD        |
| 0.0001  | Epithelial    | Foreskin Mel   | SKIN         |
| 0.0001  | Heart         | Left Ventricle | HEART        |

|        |               |                |              |
|--------|---------------|----------------|--------------|
| 0.0004 | Epithelial    | Foreskin Mel   | SKIN         |
| 0.0008 | Epithelial    | Foreskin Fibr  | SKIN         |
| 0.2672 | Epithelial    | Breast Myoe    | BREAST       |
| 0.5972 | ESC           | HUES64 Cells   | ESC          |
| 0.2469 | Thymus        | Fetal Thymus   | THYMUS       |
| 0.6009 | ES-deriv      | H1 Derived M   | ESC_DERIVED  |
| 0.5567 | Thymus        | Fetal Thymus   | THYMUS       |
| 0.1890 | Muscle        | Fetal Muscle   | MUSCLE       |
| 0.0021 | Other         | Ovary          | OVARY        |
| 0.0060 | Heart         | Aorta          | VASCULAR     |
| 0.5695 | Digestive     | Colonic Muco   | GI_COLON     |
| 0.0000 | Heart         | Right Atrium   | HEART        |
| 0.2424 | Epithelial    | Foreskin Fibr  | SKIN         |
| 0.0038 | Muscle        | Psoas Muscle   | MUSCLE       |
| 0.5665 | Digestive     | Fetal Stomac   | GI_STOMACH   |
| 0.0056 | Other         | Fetal Kidney   | KIDNEY       |
| 0.0179 | ES-deriv      | H1 BMP4 Der    | ESC_DERIVED  |
| 0.0004 | Epithelial    | Foreskin Fibr  | SKIN         |
| 0.8066 | ENCODE2012    | HepG2 Hepat    | LIVER        |
| 0.4709 | Heart         | Fetal Heart    | HEART        |
| 0.0000 | Heart         | Right Ventricl | HEART        |
| 0.6608 | ENCODE2012    | Dnd41 TCell    | L BLOOD      |
| 0.0496 | HSC & B-cell  | Primary mon    | BLOOD        |
| 0.0000 | Other         | Spleen         | SPLEEN       |
| 0.4494 | Digestive     | Colonic Muco   | GI_COLON     |
| 0.5637 | Muscle        | Psoas Muscle   | MUSCLE       |
| 0.5331 | Adipose       | Adipose Nucl   | FAT          |
| 0.8033 | ENCODE2012    | NH-A Astrocy   | BRAIN        |
| 0.0229 | Brain         | Brain_Dorsol   | BRAIN        |
| 0.0004 | Heart         | Right Ventricl | HEART        |
| 0.0001 | Other         | Fetal Adrenal  | ADRENAL      |
| 0.3529 | Digestive     | Fetal Stomac   | GI_STOMACH   |
| 0.0841 | Other         | Pancreatic Isl | PANCREAS     |
| 0.0012 | Other         | Fetal Adrenal  | ADRENAL      |
| 0.2999 | Epithelial    | Foreskin Fibr  | SKIN         |
| 0.0018 | Muscle        | Psoas Muscle   | MUSCLE       |
| 0.0024 | Muscle        | Skeletal Musc  | MUSCLE       |
| 0.0091 | Other         | Liver          | LIVER        |
| 0.9034 | Epithelial    | Breast Myoe    | BREAST       |
| 0.0080 | Digestive     | Small Intestin | GI_INTESTINE |
| 0.0001 | Brain         | Brain_Dorsol   | BRAIN        |
| 0.0000 | Other         | Spleen         | SPLEEN       |
| 0.0009 | Blood & T-cel | Primary T cell | BLOOD        |

0.5408 Heart Fetal Heart HEART  
0.0763 Other Pancreas PANCREAS  
0.4983 Adipose Adipose Nucl FAT  
0.0070 Brain Brain Inferior BRAIN  
0.0005 Other Lung LUNG  
0.6732 Neurosph Cortex derive BRAIN  
0.6209 ENCODE2012 NH-A Astrocy BRAIN  
0.0277 HSC & B-cell Primary neut BLOOD  
0.8527 Sm. Muscle Colon Smooth GI\_COLON  
0.0038 Blood & T-cell Primary T CD BLOOD  
0.6522 Sm. Muscle Stomach Smo GI\_STOMACH  
0.6943 Digestive Rectal Mucos GI\_RECTUM  
0.8814 Blood & T-cell Primary T CD BLOOD  
0.9873 ENCODE2012 HepG2 Hepat LIVER  
0.0342 Heart Aorta VASCULAR  
0.8538 Other Fetal Lung LUNG  
0.0291 Digestive Colonic Muco GI\_COLON  
0.0171 Blood & T-cell Primary T hel BLOOD  
0.0091 Blood & T-cell Primary T hel BLOOD  
0.1986 Other Lung LUNG  
0.0240 Blood & T-cell Primary mon BLOOD  
0.6341 Brain Brain Anterio BRAIN  
0.7364 Digestive Rectal Mucos GI\_RECTUM  
0.0384 Brain Brain Angular BRAIN  
0.0229 ENCODE2012 Monocytes-C BLOOD  
0.0130 Blood & T-cell Primary T hel BLOOD  
0.0031 Brain Brain\_Dorsol BRAIN  
0.2566 ES-deriv hESC Derived ESC\_DERIVED  
0.1666 Sm. Muscle Stomach Smo GI\_STOMACH  
0.7857 ES-deriv hESC Derived ESC\_DERIVED  
0.0809 Other Placenta PLACENTA  
1.0000 Blood & T-cell Primary T hel BLOOD  
0.7093 Digestive Duodenum M GI\_DUODENUM  
0.1727 ES-deriv H1 Derived M ESC\_DERIVED  
0.9021 Digestive Colonic Muco GI\_COLON  
0.0328 Other Ovary OVARY  
0.7360 Brain Brain Angular BRAIN  
0.0052 Muscle Skeletal Musc MUSCLE  
0.1470 Brain Brain Cingula BRAIN  
0.7981 Other Fetal Adrenal ADRENAL  
0.0146 Heart Fetal Heart HEART  
1.0000 Digestive Rectal Mucos GI\_RECTUM  
0.0094 Brain Brain Cingula BRAIN

|        |               |                |                    |
|--------|---------------|----------------|--------------------|
| 0.3294 | Epithelial    | Foreskin Mel   | SKIN               |
| 0.0278 | Digestive     | Esophagus      | GI_ESOPHAGUS       |
| 0.1930 | Brain         | Brain_Dorsol   | BRAIN              |
| 0.0345 | Other         | Placenta       | PLACENTA           |
| 0.0800 | Blood & T-cel | Primary T cell | BLOOD              |
| 0.0242 | Blood & T-cel | Primary T hel  | BLOOD              |
| 1.0000 | Digestive     | Duodenum IV    | GI_DUODENUM        |
| 0.2558 | Brain         | Brain Cingula  | BRAIN              |
| 0.3040 | Brain         | Brain Angular  | BRAIN              |
| 0.0731 | Heart         | Fetal Heart    | HEART              |
| 0.9873 | ENCODE2012    | NHLF Lung Fil  | LUNG               |
| 0.9873 | Other         | Spleen         | SPLEEN             |
| 0.0342 | ENCODE2012    | NH-A Astrocy   | BRAIN              |
| 0.0518 | Digestive     | Gastric        | GI_STOMACH         |
| 0.0000 | ESC           | HUES64 Cells   | ESC                |
| 0.2083 | ENCODE2012    | Dnd41 TCell L  | BLOOD              |
| 0.2529 | Brain         | Brain Hippoc   | BRAIN              |
| 0.1621 | Digestive     | Sigmoid Coloi  | GI_COLON           |
| 0.4319 | ENCODE2012    | NHEK-Epiderr   | SKIN               |
| 0.2119 | ENCODE2012    | Dnd41 TCell L  | BLOOD              |
| 1.0000 | Brain         | Brain Anterio  | BRAIN              |
| 0.1880 | Heart         | Fetal Heart    | HEART              |
| 0.0278 | Digestive     | Fetal Stomac   | GI_STOMACH         |
| 0.4491 | Mesench       | Mesenchyma     | STROMAL_CONNECTIVE |
| 0.6690 | ENCODE2012    | Dnd41 TCell L  | BLOOD              |
| 0.0834 | Heart         | Left Ventricle | HEART              |
| 0.0342 | Adipose       | Adipose Nucl   | FAT                |
| 0.8431 | Epithelial    | Breast Myoe    | BREAST             |
| 0.0440 | Brain         | Brain Inferior | BRAIN              |
| 0.0392 | Muscle        | Fetal Muscle   | MUSCLE             |
| 0.2430 | ENCODE2012    | HUVEC Umbil    | VASCULAR           |
| 1.0000 | Neurosph      | Ganglion Emi   | BRAIN              |
| 0.0893 | HSC & B-cell  | Primary hem    | BLOOD              |
| 0.1505 | Brain         | Brain Inferior | BRAIN              |
| 0.0000 | ESC           | HUES48 Cells   | ESC                |
| 0.1579 | HSC & B-cell  | Primary hem    | BLOOD              |
| 0.1023 | iPSC          | iPS DF 19.11   | (IPSC              |
| 0.0612 | Epithelial    | Foreskin Fibr  | SKIN               |
| 1.0000 | Epithelial    | Breast varian  | BREAST             |
| 0.1272 | Digestive     | Colonic Muco   | GI_COLON           |
| 0.1281 | ENCODE2012    | Monocytes-C    | BLOOD              |
| 0.1156 | Sm. Muscle    | Stomach Smo    | GI_STOMACH         |
| 0.2537 | ESC           | ES-WA7 Cells   | ESC                |

1.0000 ENCODE2012 NHDF-Ad Ad SKIN  
 0.1923 Blood & T-cel Primary T CD4 BLOOD  
 0.1411 ENCODE2012 Osteoblast Pr BONE  
 1.0000 Epithelial Foreskin Fibro SKIN  
 1.0000 Heart Right Ventricle HEART  
 0.4491 Blood & T-cel Primary T reg BLOOD  
 0.8477 ENCODE2012 HSMM Skelet MUSCLE  
 1.0000 Sm. Muscle Rectal Smooth GI\_RECTUM  
 0.8313 ENCODE2012 HSMM Skelet MUSCLE  
 0.4307 Muscle Fetal Muscle MUSCLE  
 0.6891 Muscle Skeletal Muscle MUSCLE  
 1.0000 Digestive Small Intestine GI\_INTESTINE  
 1.0000 ENCODE2012 HepG2 Hepat LIVER  
 0.1319 Epithelial Foreskin Fibro SKIN  
 0.6971 Blood & T-cel Primary T helper BLOOD  
 0.6192 Muscle Skeletal Muscle MUSCLE  
 0.2198 Myosat Muscle Satellite MUSCLE  
 0.3003 Adipose Adipose Nucleus FAT  
 1.0000 ENCODE2012 Dnd41 TCell L BLOOD  
 0.4943 Digestive Fetal Stomach GI\_STOMACH  
 1.0000 Digestive Fetal Intestine GI\_INTESTINE  
 0.4314 HSC & B-cell Primary monocyte BLOOD  
 0.2341 Other Liver LIVER  
 0.1727 Brain Brain Angular BRAIN  
 0.1161 Epithelial Breast Myocyte BREAST  
 1.0000 Epithelial Foreskin Melanocyte SKIN  
 0.2341 Brain Brain Angular BRAIN  
 0.0000 Adipose Adipose Nucleus FAT  
 0.3913 Muscle Skeletal Muscle MUSCLE  
 0.0000 iPSC iPSC-20b Cells IPSC  
 1.0000 Digestive Rectal Mucosa GI\_RECTUM  
 0.4028 HSC & B-cell Primary Natural Killer BLOOD  
 0.0000 iPSC iPSC-18 Cells IPSC  
 1.0000 ES-deriv H1 Derived Nucleus ESC\_DERIVED  
 0.5609 Mesenchyme Mesenchyma STROMAL\_CONNECTIVE  
 0.3092 ES-deriv H1 BMP4 Derived ESC\_DERIVED  
 1.0000 ESC H9 Cells ESC  
 0.5489 Mesenchyme Mesenchyma STROMAL\_CONNECTIVE  
 0.5823 iPSC iPSC-15b Cells IPSC  
 0.7273 HSC & B-cell Primary hematopoietic BLOOD  
 0.4709 Brain Fetal Brain Fetal BRAIN  
 0.4494 Blood & T-cel Primary T helper BLOOD  
 1.0000 Brain Brain Cingulate BRAIN



0.3234 Digestive Duodenum M GI\_DUODENUM  
 0.5577 Blood & T-cel Primary T reg BLOOD  
 0.2999 Epithelial Foreskin Mel SKIN  
 0.0767 HSC & B-cell Primary monc BLOOD  
 0.2341 Epithelial Foreskin Fibrc SKIN  
 0.4301 ES-deriv H1 Derived M ESC\_DERIVED  
 0.7377 ENCODE2012 HSMM cell de MUSCLE  
 0.5331 Muscle Skeletal Musc MUSCLE  
 0.4501 IMR90 IMR90 fetal l LUNG  
 0.0000 Sm. Muscle Duodenum Sr GI\_DUODENUM  
 0.7377 Muscle Fetal Muscle MUSCLE\_LEG  
 1.0000 Myosat Muscle Satell MUSCLE  
 0.9647 Myosat Muscle Satell MUSCLE  
 0.0000 Other Liver LIVER  
 1.0000 Blood & T-cel Primary T hel BLOOD  
 1.0000 Adipose Adipose Nucl FAT  
 0.7371 ENCODE2012 Monocytes-C BLOOD  
 0.7043 Mesench Mesenchyma FAT  
 1.0000 iPSC iPS-18 Cells IPSC  
 0.0069 Other Liver LIVER  
 0.3040 Epithelial Foreskin Fibrc SKIN  
 0.2183 HSC & B-cell Primary neut BLOOD  
 0.0000 ES-deriv hESC Derived ESC\_DERIVED  
 0.4408 HSC & B-cell Primary B cell BLOOD  
 1.0000 Digestive Fetal Intestin GI\_INTESTINE  
 0.6001 ES-deriv H1 Derived N ESC\_DERIVED  
 1.0000 ENCODE2012 HSMM Skelet MUSCLE  
 1.0000 Muscle Skeletal Musc MUSCLE  
 1.0000 ENCODE2012 HSMM cell de MUSCLE  
 1.0000 Sm. Muscle Colon Smooth GI\_COLON  
 1.0000 ES-deriv hESC Derived ESC\_DERIVED  
 0.9572 ENCODE2012 HSMM cell de MUSCLE  
 1.0000 Blood & T-cel Primary monc BLOOD  
 1.0000 Epithelial Foreskin Mel SKIN  
 0.0000 Brain Brain Hippoc BRAIN  
 0.6252 Sm. Muscle Duodenum Sr GI\_DUODENUM  
 0.7304 Blood & T-cel Primary T hel BLOOD  
 1.0000 ENCODE2012 HSMM Skelet MUSCLE  
 1.0000 HSC & B-cell Primary B cell BLOOD  
 0.0000 Digestive Rectal Mucos GI\_RECTUM  
 0.0819 Brain Brain Hippoc BRAIN  
 0.6971 Brain Fetal Brain M BRAIN  
 0.8856 ENCODE2012 NHLF Lung Fil LUNG

|        |               |                |                    |
|--------|---------------|----------------|--------------------|
| 0.6732 | Other         | Pancreas       | PANCREAS           |
| 0.0000 | Heart         | Fetal Heart    | HEART              |
| 0.7893 | HSC & B-cell  | Primary B cell | BLOOD              |
| 1.0000 | HSC & B-cell  | Primary hem    | BLOOD              |
| 0.5695 | Brain         | Brain Anterio  | BRAIN              |
| 0.0000 | Digestive     | Duodenum M     | GI_DUODENUM        |
| 0.0009 | Other         | Placenta       | PLACENTA           |
| 1.0000 | ES-deriv      | hESC Derived   | ESC_DERIVED        |
| 0.0001 | Muscle        | Psoas Muscle   | MUSCLE             |
| 0.0001 | Other         | Ovary          | OVARY              |
| 1.0000 | ES-deriv      | hESC Derived   | ESC_DERIVED        |
| 1.0000 | Digestive     | Fetal Intestin | GI_INTESTINE       |
| 0.7044 | Muscle        | Fetal Muscle   | MUSCLE_LEG         |
| 1.0000 | ES-deriv      | H1 Derived N   | ESC_DERIVED        |
| 1.0000 | Other         | Spleen         | SPLEEN             |
| 1.0000 | Digestive     | Fetal Intestin | GI_INTESTINE       |
| 1.0000 | Mesench       | Mesenchyma     | FAT                |
| 0.0002 | Heart         | Right Atrium   | HEART              |
| 0.0882 | Other         | Spleen         | SPLEEN             |
| 1.0000 | Mesench       | Bone Marrow    | STROMAL_CONNECTIVE |
| 0.0969 | HSC & B-cell  | Primary neut   | BLOOD              |
| 1.0000 | ENCODE2012    | NH-A Astrocy   | BRAIN              |
| 0.0001 | Other         | Pancreas       | PANCREAS           |
| 0.0001 | Heart         | Right Ventricl | HEART              |
| 0.1923 | Other         | Liver          | LIVER              |
| 0.0000 | Brain         | Brain Inferior | BRAIN              |
| 0.8687 | Brain         | Brain Substar  | BRAIN              |
| 0.9586 | Adipose       | Adipose Nucl   | FAT                |
| 0.3410 | Other         | Fetal Lung     | LUNG               |
| 0.9572 | Blood & T-cel | Primary T hel  | BLOOD              |
| 0.1582 | Other         | Placenta       | PLACENTA           |
| 0.0278 | ES-deriv      | H1 BMP4 Der    | ESC_DERIVED        |
| 0.8961 | Brain         | Brain Hippoc   | BRAIN              |
| 0.2892 | Heart         | Right Atrium   | HEART              |
| 0.8538 | Mesench       | Mesenchyma     | STROMAL_CONNECTIVE |
| 0.0102 | Heart         | Aorta          | VASCULAR           |
| 0.0000 | Mesench       | Adipose Deriv  | FAT                |
| 1.0000 | HSC & B-cell  | Primary B cell | BLOOD              |
| 1.0000 | HSC & B-cell  | Primary hem    | BLOOD              |
| 0.0000 | Muscle        | Skeletal Musc  | MUSCLE             |
| 0.0000 | ENCODE2012    | Monocytes-C    | BLOOD              |
| 1.0000 | Digestive     | Rectal Mucos   | GI_RECTUM          |
| 0.0000 | ES-deriv      | hESC Derived   | ESC_DERIVED        |

|        |              |                |             |
|--------|--------------|----------------|-------------|
| 0.0000 | Mesench      | Mesenchyma     | FAT         |
| 1.0000 | ESC          | H9 Cells       | ESC         |
| 1.0000 | ENCODE2012   | HSMM Skelet    | MUSCLE      |
| 1.0000 | Digestive    | Rectal Mucos   | GI_RECTUM   |
| 0.0242 | Muscle       | Fetal Muscle   | MUSCLE      |
| 1.0000 | ENCODE2012   | HUVEC Umbil    | VASCULAR    |
| 1.0000 | Digestive    | Stomach Muc    | GI_STOMACH  |
| 0.9968 | Sm. Muscle   | Colon Smooth   | GI_COLON    |
| 1.0000 | IMR90        | IMR90 fetal    | LUNG        |
| 0.5053 | Brain        | Brain Angular  | BRAIN       |
| 1.0000 | Heart        | Aorta          | VASCULAR    |
| 0.0277 | IMR90        | IMR90 fetal    | LUNG        |
| 0.0002 | ESC          | HUES6 Cells    | ESC         |
| 0.4501 | Other        | Fetal Kidney   | KIDNEY      |
| 0.0342 | Heart        | Left Ventricle | HEART       |
| 0.0001 | ES-deriv     | H1 BMP4 Der    | ESC_DERIVED |
| 1.0000 | ESC          | H9 Cells       | ESC         |
| 1.0000 | Myosat       | Muscle Satell  | MUSCLE      |
| 1.0000 | Digestive    | Stomach Muc    | GI_STOMACH  |
| 1.0000 | Epithelial   | Breast Myoe    | BREAST      |
| 0.9572 | Brain        | Brain Hippoc   | BRAIN       |
| 0.0001 | Brain        | Brain Cingula  | BRAIN       |
| 0.0004 | Digestive    | Colonic Muco   | GI_COLON    |
| 0.0495 | Muscle       | Fetal Muscle   | MUSCLE_LEG  |
| 0.0001 | ENCODE2012   | HeLa-S3 Cervi  | CERVIX      |
| 1.0000 | Muscle       | Fetal Muscle   | MUSCLE_LEG  |
| 0.0001 | ES-deriv     | H1 Derived M   | ESC_DERIVED |
| 0.0363 | ES-deriv     | H9 Derived N   | ESC_DERIVED |
| 0.6209 | Brain        | Brain Cingula  | BRAIN       |
| 1.0000 | ENCODE2012   | A549 EtOH 0.   | LUNG        |
| 1.0000 | IMR90        | IMR90 fetal    | LUNG        |
| 0.0015 | Other        | Fetal Lung     | LUNG        |
| 0.6252 | Brain        | Brain Inferior | BRAIN       |
| 0.0427 | Epithelial   | Foreskin Mel   | SKIN        |
| 0.0032 | ESC          | ES-I3 Cells    | ESC         |
| 1.0000 | ENCODE2012   | NHDF-Ad Ad     | SKIN        |
| 0.5561 | HSC & B-cell | Primary B cell | BLOOD       |
| 1.0000 | ES-deriv     | hESC Derived   | ESC_DERIVED |
| 0.0011 | ESC          | ES-I3 Cells    | ESC         |
| 0.0004 | Sm. Muscle   | Colon Smooth   | GI_COLON    |
| 0.0649 | ESC          | H1 Cells       | ESC         |
| 0.0210 | Epithelial   | Breast Myoe    | BREAST      |
| 0.0008 | Brain        | Brain Anterio  | BRAIN       |

|        |               |                |              |
|--------|---------------|----------------|--------------|
| 0.0056 | ES-deriv      | H1 Derived N   | ESC_DERIVED  |
| 1.0000 | Mesench       | Adipose Deriv  | FAT          |
| 1.0000 | Neurosph      | Ganglion Emi   | BRAIN        |
| 0.0021 | Brain         | Brain Substar  | BRAIN        |
| 1.0000 | Brain         | Brain Substar  | BRAIN        |
| 0.1155 | Neurosph      | Cortex derive  | BRAIN        |
| 0.8313 | ES-deriv      | H1 Derived N   | ESC_DERIVED  |
| 0.0069 | Brain         | Brain Angular  | BRAIN        |
| 0.0800 | Blood & T-cel | Primary T cell | BLOOD        |
| 1.0000 | Thymus        | Thymus         | THYMUS       |
| 0.1579 | Digestive     | Fetal Stomach  | GI_STOMACH   |
| 0.1579 | Other         | Fetal Kidney   | KIDNEY       |
| 0.1291 | ES-deriv      | hESC Derived   | ESC_DERIVED  |
| 0.1155 | Digestive     | Fetal Intestin | GI_INTESTINE |
| 1.0000 | ESC           | HUES6 Cells    | ESC          |
| 0.0427 | Blood & T-cel | Primary T hel  | BLOOD        |
| 0.1403 | HSC & B-cell  | Primary hem    | BLOOD        |
| 0.1422 | ENCODE2012    | HSMM Skelet    | MUSCLE       |
| 0.7113 | ESC           | H9 Cells       | ESC          |
| 1.0000 | ENCODE2012    | HSMM Skelet    | MUSCLE       |
| 0.0363 | Muscle        | Skeletal Musc  | MUSCLE       |
| 0.0899 | ES-deriv      | H1 BMP4 Der    | ESC_DERIVED  |
| 0.9968 | Muscle        | Skeletal Musc  | MUSCLE       |
| 0.1161 | ESC           | H9 Cells       | ESC          |
| 0.3407 | Other         | Pancreatic Isl | PANCREAS     |
| 0.6388 | Brain         | Fetal Brain Fe | BRAIN        |
| 0.9240 | ENCODE2012    | Monocytes-C    | BLOOD        |
| 0.9572 | Brain         | Brain_Dorsol   | BRAIN        |
| 0.0242 | Other         | Ovary          | OVARY        |
| 0.1453 | ENCODE2012    | K562 Leukem    | BLOOD        |
| 0.3653 | HSC & B-cell  | Primary Natu   | BLOOD        |
| 0.3081 | ENCODE2012    | HMEC Mamr      | BREAST       |
| 1.0000 | Other         | Liver          | LIVER        |
| 0.9647 | Digestive     | Rectal Mucos   | GI_RECTUM    |
| 1.0000 | ENCODE2012    | NH-A Astrocy   | BRAIN        |
| 1.0000 | Digestive     | Colonic Muco   | GI_COLON     |
| 0.0516 | ENCODE2012    | HeLa-S3 Cervi  | CERVIX       |
| 1.0000 | Sm. Muscle    | Duodenum Sr    | GI_DUODENUM  |
| 0.1161 | Epithelial    | Foreskin Mel   | SKIN         |
| 0.0364 | ESC           | ES-WA7 Cells   | ESC          |
| 0.4028 | Other         | Fetal Kidney   | KIDNEY       |
| 0.1791 | Blood & T-cel | Primary T hel  | BLOOD        |
| 0.0832 | IMR90         | IMR90 fetal l  | LUNG         |

1.0000 Mesench Bone Marrow STROMAL\_CONNECTIVE  
 0.4211 Blood & T-cel Primary T cell BLOOD  
 1.0000 Digestive Fetal Intestini GI\_INTESTINE  
 0.3653 Neurosph Ganglion Emi BRAIN  
 0.7812 ES-deriv H1 Derived N ESC\_DERIVED  
 0.1666 Digestive Gastric GI\_STOMACH  
 0.3460 ENCODE2012 K562 Leukem BLOOD  
 1.0000 ES-deriv H1 BMP4 Der ESC\_DERIVED  
 0.6373 Other Fetal Adrenal ADRENAL  
 0.7592 Other Lung LUNG  
 1.0000 Brain Brain Anterio BRAIN  
 0.8538 Brain Fetal Brain M BRAIN  
 0.2999 Blood & T-cel Primary T CD8 BLOOD  
 0.2186 iPSC iPS-15b Cells IPSC  
 0.5609 ENCODE2012 NHDF-Ad Adu SKIN  
 1.0000 Other Liver LIVER  
 0.1281 Blood & T-cel Primary T CD8 BLOOD  
 0.6209 Other Pancreatic Isl PANCREAS  
 1.0000 Blood & T-cel Primary T hel BLOOD  
 1.0000 Sm. Muscle Stomach Smo GI\_STOMACH  
 1.0000 Sm. Muscle Colon Smooth GI\_COLON  
 0.6891 ES-deriv H9 Derived N ESC\_DERIVED  
 0.0995 ENCODE2012 K562 Leukem BLOOD  
 1.0000 HSC & B-cell Primary neut BLOOD  
 0.6765 Thymus Fetal Thymus THYMUS  
 0.7081 Digestive Fetal Intestini GI\_INTESTINE  
 1.0000 ENCODE2012 HepG2 Hepat LIVER  
 0.8806 Other Spleen SPLEEN  
 0.2621 Blood & T-cel Primary T reg BLOOD  
 0.7516 ENCODE2012 NHLF Lung Fil LUNG  
 0.8477 iPSC iPS DF 6.9 Cel IPSC  
 0.6209 ESC ES-UCSF4 Cel ESC  
 0.8066 Thymus Thymus THYMUS  
 0.3653 Heart Right Atrium HEART  
 0.7187 ENCODE2012 Dnd41 TCell L BLOOD  
 0.4152 ENCODE2012 A549 EtOH 0. LUNG  
 0.7483 Digestive Esophagus GI\_ESOPHAGUS  
 0.1579 Blood & T-cel Primary T reg BLOOD  
 0.7043 ENCODE2012 HepG2 Hepat LIVER  
 0.7043 Epithelial Foreskin Kera SKIN  
 0.7822 Brain Brain Germin BRAIN  
 0.6209 Blood & T-cel Primary T hel BLOOD  
 1.0000 Muscle Fetal Muscle MUSCLE

1.0000 Blood & T-cel Primary T hel BLOOD  
 0.7364 Blood & T-cel Primary T hel BLOOD  
 0.6345 Blood & T-cel Primary T hel BLOOD  
 1.0000 HSC & B-cell Primary monc BLOOD  
 0.6891 Other Lung LUNG  
 1.0000 Brain Brain\_Dorsolc BRAIN  
 1.0000 Other Pancreatic Islc PANCREAS  
 1.0000 ENCODE2012 NHLF Lung Fil LUNG  
 0.6264 Sm. Muscle Rectal Smoot GI\_RECTUM  
 1.0000 ENCODE2012 Osteoblast Pr BONE  
 0.5975 Epithelial Foreskin Fibrc SKIN  
 1.0000 Brain Brain Cingulac BRAIN  
 0.7043 Blood & T-cel Primary T hel BLOOD  
 1.0000 Thymus Fetal Thymus THYMUS  
 1.0000 Epithelial Foreskin Fibrc SKIN  
 0.4113 Brain Brain Inferior BRAIN  
 0.7093 Digestive Rectal Mucos GI\_RECTUM  
 1.0000 Brain Brain Substar BRAIN  
 1.0000 Blood & T-cel Primary monc BLOOD  
 1.0000 ENCODE2012 NHDF-Ad Adc SKIN  
 1.0000 Brain Brain Angular BRAIN  
 1.0000 ENCODE2012 Dnd41 TCell L BLOOD  
 1.0000 Digestive Rectal Mucos GI\_RECTUM  
 0.9712 Blood & T-cel Primary T reg BLOOD  
 1.0000 ENCODE2012 HUVEC Umbil VASCULAR  
 1.0000 Blood & T-cel Primary T hel BLOOD  
 0.8469 Brain Brain\_Dorsolc BRAIN  
 0.7377 IMR90 IMR90 fetal lc LUNG  
 0.9572 Mesench Mesenchyma STROMAL\_CONNECTIVE  
 0.6741 Blood & T-cel Primary T hel BLOOD  
 1.0000 ENCODE2012 K562 Leukem BLOOD  
 1.0000 Blood & T-cel Primary T hel BLOOD  
 1.0000 ENCODE2012 HUVEC Umbil VASCULAR  
 1.0000 HSC & B-cell Primary Natu BLOOD  
 1.0000 Blood & T-cel Primary T cell BLOOD  
 1.0000 Digestive Small Intestin GI\_INTESTINE  
 1.0000 HSC & B-cell Primary B cell BLOOD  
 0.9772 Brain Brain\_Dorsolc BRAIN  
 1.0000 ENCODE2012 Osteoblast Pr BONE  
 1.0000 Sm. Muscle Colon Smootf GI\_COLON  
 1.0000 HSC & B-cell Primary B cell BLOOD  
 1.0000 Other Placenta Amr PLACENTA  
 0.9926 Sm. Muscle Stomach Smo GI\_STOMACH

0.9968 ENCODE2012 HeLa-S3 Cervi CERVIX  
 0.9647 Muscle Fetal Muscle MUSCLE\_LEG  
 1.0000 Brain Fetal Brain Fe BRAIN  
 1.0000 HSC & B-cell Primary B cell BLOOD  
 0.8527 Other Fetal Adrenal ADRENAL  
 0.9921 ENCODE2012 Dnd41 TCell L BLOOD  
 1.0000 Brain Brain Inferior BRAIN  
 1.0000 Blood & T-cel Primary T cell BLOOD  
 1.0000 HSC & B-cell Primary hemæ BLOOD  
 1.0000 iPSC iPS DF 19.11 (IPSC  
 1.0000 Epithelial Breast varian BREAST  
 1.0000 Muscle Psoas Muscle MUSCLE  
 1.0000 ENCODE2012 NHDF-Ad Adu SKIN  
 1.0000 Blood & T-cel Primary monç BLOOD  
 1.0000 Blood & T-cel Primary T CDç BLOOD  
 1.0000 ENCODE2012 HUVEC Umbil VASCULAR  
 1.0000 Other Lung LUNG  
 1.0000 HSC & B-cell Primary hemæ BLOOD  
 1.0000 Blood & T-cel Primary T hel BLOOD  
 1.0000 Brain Brain Angular BRAIN  
 1.0000 Brain Fetal Brain M BRAIN  
 1.0000 Myosat Muscle Satell MUSCLE  
 1.0000 ENCODE2012 NH-A Astrocy BRAIN  
 1.0000 Epithelial Foreskin Kera SKIN  
 1.0000 Epithelial Foreskin Fibrc SKIN  
 1.0000 Digestive Stomach Muc GI\_STOMACH  
 1.0000 Blood & T-cel Primary T hel BLOOD  
 1.0000 Blood & T-cel Primary T hel BLOOD  
 1.0000 Other Placenta PLACENTA  
 1.0000 Digestive Rectal Mucos GI\_RECTUM  
 1.0000 Brain Brain Substar BRAIN  
 1.0000 Sm. Muscle Duodenum Sr GI\_DUODENUM  
 1.0000 Epithelial Foreskin Melç SKIN  
 1.0000 ENCODE2012 HepG2 Hepat LIVER  
 1.0000 ESC H9 Cells ESC  
 1.0000 ENCODE2012 HSMM Skelet MUSCLE  
 1.0000 ES-deriv H1 Derived N ESC\_DERIVED  
 1.0000 Blood & T-cel Primary T cell BLOOD  
 1.0000 ES-deriv hESC Derived ESC\_DERIVED  
 1.0000 Blood & T-cel Primary T CDç BLOOD  
 1.0000 ENCODE2012 Dnd41 TCell L BLOOD  
 1.0000 Muscle Skeletal Musc MUSCLE  
 1.0000 ENCODE2012 HUVEC Umbil VASCULAR

1.0000 ES-deriv hESC Derived ESC\_DERIVED  
 1.0000 ES-deriv H9 Derived N ESC\_DERIVED  
 1.0000 Muscle Skeletal Musc MUSCLE  
 1.0000 iPSC iPS DF 19.11 (IPSC  
 1.0000 Digestive Sigmoid Color GI\_COLON  
 1.0000 Heart Fetal Heart HEART  
 1.0000 Sm. Muscle Stomach Smo GI\_STOMACH  
 1.0000 ESC H9 Cells ESC  
 1.0000 iPSC iPS-18 Cells IPSC  
 1.0000 Blood & T-cel Primary T hel BLOOD  
 1.0000 Digestive Rectal Mucos GI\_RECTUM  
 1.0000 Other Fetal Lung LUNG  
 1.0000 Brain Brain Substar BRAIN  
 1.0000 Other Spleen SPLEEN  
 1.0000 Digestive Rectal Mucos GI\_RECTUM  
 1.0000 ES-deriv hESC Derived ESC\_DERIVED  
 1.0000 ENCODE2012 HSMM Skelet MUSCLE  
 1.0000 Blood & T-cel Primary T reg BLOOD  
 1.0000 Heart Left Ventricle HEART  
 1.0000 Blood & T-cel Primary T CD8 BLOOD  
 1.0000 Blood & T-cel Primary T hel BLOOD  
 1.0000 Brain Brain Angular BRAIN  
 1.0000 HSC & B-cell Primary neut BLOOD  
 1.0000 HSC & B-cell Primary B cell BLOOD  
 1.0000 ENCODE2012 A549 EtOH 0. LUNG  
 1.0000 Brain Fetal Brain M BRAIN  
 1.0000 Brain Fetal Brain M BRAIN  
 1.0000 Brain Fetal Brain Fe BRAIN  
 1.0000 ENCODE2012 HepG2 Hepat LIVER  
 1.0000 Brain Brain Substar BRAIN  
 1.0000 Blood & T-cel Primary T hel BLOOD  
 1.0000 Muscle Fetal Muscle MUSCLE  
 1.0000 Blood & T-cel Primary T cell BLOOD  
 1.0000 Brain Brain Anterio BRAIN  
 1.0000 ENCODE2012 HeLa-S3 Cervi CERVIX  
 1.0000 Epithelial Breast Myoe BREAST  
 1.0000 Muscle Skeletal Musc MUSCLE  
 1.0000 ES-deriv H1 Derived M ESC\_DERIVED  
 1.0000 ENCODE2012 HSMM cell de MUSCLE  
 1.0000 HSC & B-cell Primary mon BLOOD  
 1.0000 Brain Brain\_Dorsol BRAIN  
 1.0000 Sm. Muscle Stomach Smo GI\_STOMACH  
 1.0000 ENCODE2012 HMEC Mamr BREAST



1.0000 Digestive Duodenum M GI\_DUODENUM  
 1.0000 HSC & B-cell Primary hemæ BLOOD  
 1.0000 Brain Brain Angular BRAIN  
 1.0000 ENCODE2012 Dnd41 TCell L BLOOD  
 1.0000 Blood & T-cel Primary monç BLOOD  
 1.0000 Brain Brain\_Dorsolç BRAIN  
 1.0000 ENCODE2012 HSMM cell de MUSCLE  
 1.0000 Other Fetal Kidney KIDNEY  
 1.0000 Muscle Skeletal Musc MUSCLE  
 1.0000 Mesench Adipose Deriv FAT  
 1.0000 Brain Brain Inferior BRAIN  
 1.0000 ES-deriv H1 Derived M ESC\_DERIVED  
 1.0000 Brain Brain Inferior BRAIN  
 1.0000 ES-deriv H1 Derived M ESC\_DERIVED  
 1.0000 Other Pancreas PANCREAS  
 1.0000 ENCODE2012 Osteoblast Pr BONE  
 1.0000 HSC & B-cell Primary hemæ BLOOD  
 1.0000 Blood & T-cel Primary T CDç BLOOD  
 1.0000 Blood & T-cel Primary T hel BLOOD  
 1.0000 ES-deriv H1 Derived M ESC\_DERIVED  
 1.0000 ENCODE2012 Monocytes-C BLOOD  
 1.0000 ENCODE2012 Osteoblast Pr BONE  
 1.0000 Blood & T-cel Primary T cell BLOOD  
 1.0000 ENCODE2012 HSMM cell de MUSCLE  
 1.0000 Digestive Small Intestin GI\_INTESTINE  
 1.0000 Blood & T-cel Primary T reg BLOOD  
 1.0000 Other Pancreas PANCREAS  
 1.0000 Heart Right Ventricl HEART  
 1.0000 Mesench Bone Marrow STROMAL\_CONNECTIVE  
 1.0000 Other Fetal Lung LUNG  
 1.0000 Digestive Colonic Muco GI\_COLON  
 1.0000 Blood & T-cel Primary T hel BLOOD  
 1.0000 Brain Brain Anterio BRAIN  
 1.0000 ESC H9 Cells ESC  
 1.0000 Other Pancreas PANCREAS  
 1.0000 Mesench Mesenchyma FAT  
 1.0000 ESC H1 Cells ESC  
 1.0000 Digestive Rectal Mucos GI\_RECTUM  
 1.0000 ENCODE2012 Dnd41 TCell L BLOOD  
 1.0000 Blood & T-cel Primary T hel BLOOD  
 1.0000 Other Ovary OVARY  
 1.0000 Other Fetal Adrenal ADRENAL  
 1.0000 Heart Right Ventricl HEART

1.0000 Brain Brain Cingula: BRAIN  
 1.0000 ES-deriv H1 BMP4 Der ESC\_DERIVED  
 1.0000 Brain Brain Hippoc: BRAIN  
 1.0000 Mesench Mesenchyma FAT  
 1.0000 Digestive Fetal Stomach GI\_STOMACH  
 1.0000 Muscle Fetal Muscle MUSCLE  
 1.0000 Brain Brain Anterio BRAIN  
 1.0000 Blood & T-cell Primary T cell BLOOD  
 1.0000 Other Lung LUNG  
 1.0000 Other Spleen SPLEEN  
 1.0000 ENCODE2012 NH-A Astrocy BRAIN  
 1.0000 Mesench Adipose Deriv FAT  
 1.0000 Digestive Stomach Muc GI\_STOMACH  
 1.0000 Blood & T-cell Primary T CD8 BLOOD  
 1.0000 ENCODE2012 A549 EtOH 0. LUNG  
 1.0000 HSC & B-cell Primary hem: BLOOD  
 1.0000 Adipose Adipose Nucl: FAT  
 1.0000 Digestive Stomach Muc GI\_STOMACH  
 1.0000 Other Liver LIVER  
 1.0000 Other Placenta PLACENTA  
 1.0000 ES-deriv H1 BMP4 Der ESC\_DERIVED  
 1.0000 ENCODE2012 HSMM Skelet MUSCLE  
 1.0000 Brain Brain Hippoc: BRAIN  
 1.0000 IMR90 IMR90 fetal LUNG  
 1.0000 Sm. Muscle Colon Smooth GI\_COLON  
 1.0000 Blood & T-cell Primary T hel BLOOD  
 1.0000 Epithelial Breast Myoe: BREAST  
 1.0000 Blood & T-cell Primary T hel BLOOD  
 1.0000 Epithelial Foreskin Fibr: SKIN  
 1.0000 Myosat Muscle Satell MUSCLE  
 1.0000 Blood & T-cell Primary T hel BLOOD  
 1.0000 Epithelial Foreskin Fibr: SKIN  
 1.0000 Other Placenta PLACENTA  
 1.0000 ENCODE2012 NHDF-Ad Ad: SKIN  
 1.0000 Other Spleen SPLEEN  
 1.0000 Other Fetal Kidney KIDNEY  
 1.0000 Brain Brain Cingula: BRAIN  
 1.0000 Digestive Esophagus GI\_ESOPHAGUS  
 1.0000 ENCODE2012 Monocytes-C BLOOD  
 1.0000 Brain Brain Anterio BRAIN  
 1.0000 ENCODE2012 NH-A Astrocy BRAIN  
 1.0000 ENCODE2012 HMEC Mamr BREAST  
 1.0000 Digestive Stomach Muc GI\_STOMACH

1.0000 Digestive Gastric GI\_STOMACH  
 1.0000 ENCODE2012 NHLF Lung Fil LUNG  
 1.0000 Brain Brain Cingula BRAIN  
 1.0000 ENCODE2012 NHDF-Ad Ad SKIN  
 1.0000 Muscle Skeletal Musc MUSCLE  
 1.0000 Epithelial Foreskin Fibrc SKIN  
 1.0000 ES-deriv H1 Derived M ESC\_DERIVED  
 1.0000 Digestive Gastric GI\_STOMACH  
 1.0000 Digestive Small Intestin GI\_INTESTINE  
 1.0000 Muscle Psoas Muscle MUSCLE  
 1.0000 HSC & B-cell Primary B cell BLOOD  
 1.0000 ENCODE2012 NHEK-Epiderr SKIN  
 1.0000 Blood & T-cel Primary T cell BLOOD  
 1.0000 ESC HUES64 Cells ESC  
 1.0000 ENCODE2012 HMEC Mamr BREAST  
 1.0000 ES-deriv H9 Derived N ESC\_DERIVED  
 1.0000 Other Lung LUNG  
 1.0000 HSC & B-cell Primary hemæ BLOOD  
 1.0000 Epithelial Foreskin Melæ SKIN  
 1.0000 Sm. Muscle Rectal Smoot GI\_RECTUM  
 1.0000 Other Ovary OVARY  
 1.0000 ENCODE2012 NH-A Astrocy BRAIN  
 1.0000 Sm. Muscle Colon Smoot GI\_COLON  
 1.0000 ES-deriv H1 Derived M ESC\_DERIVED  
 1.0000 ENCODE2012 NHLF Lung Fil LUNG  
 1.0000 Neurosph Cortex derive BRAIN  
 1.0000 Other Ovary OVARY  
 1.0000 Brain Brain\_Dorsolæ BRAIN  
 1.0000 Digestive Colonic Muco GI\_COLON  
 1.0000 Other Fetal Lung LUNG  
 1.0000 Digestive Rectal Mucos GI\_RECTUM  
 1.0000 Other Pancreatic Islæ PANCREAS  
 1.0000 Brain Brain Hippocæ BRAIN  
 1.0000 Digestive Fetal Stomacl GI\_STOMACH  
 1.0000 Muscle Skeletal Musc MUSCLE  
 1.0000 Blood & T-cel Primary T hel BLOOD  
 1.0000 ENCODE2012 HMEC Mamr BREAST  
 1.0000 Digestive Sigmoid Color GI\_COLON  
 1.0000 Digestive Colonic Muco GI\_COLON  
 1.0000 ENCODE2012 NH-A Astrocy BRAIN  
 1.0000 ENCODE2012 HeLa-S3 Cervi CERVIX  
 1.0000 Mesench Bone Marrow STROMAL\_CONNECTIVE  
 1.0000 Blood & T-cel Primary T hel BLOOD

1.0000 Mesench Mesenchyma STROMAL\_CONNECTIVE  
 1.0000 iPSC iPS DF 6.9 Cell IPSC  
 1.0000 ENCODE2012 HeLa-S3 Cervi CERVIX  
 1.0000 Digestive Fetal Intestini GI\_INTESTINE  
 1.0000 Other Ovary OVARY  
 1.0000 Muscle Skeletal Musc MUSCLE  
 1.0000 Brain Brain Angular BRAIN  
 1.0000 ESC H9 Cells ESC  
 1.0000 Blood & T-cel Primary T hel BLOOD  
 1.0000 Blood & T-cel Primary T cell BLOOD  
 1.0000 Blood & T-cel Primary monc BLOOD  
 1.0000 iPSC iPS-20b Cells IPSC  
 1.0000 ENCODE2012 HSMM cell de MUSCLE  
 1.0000 Digestive Rectal Mucos GI\_RECTUM  
 1.0000 HSC & B-cell Primary monc BLOOD  
 1.0000 Sm. Muscle Stomach Smo GI\_STOMACH  
 1.0000 ENCODE2012 A549 EtOH 0. LUNG  
 1.0000 Other Placenta PLACENTA  
 1.0000 ENCODE2012 HSMM Skelet MUSCLE  
 1.0000 Thymus Fetal Thymus THYMUS  
 1.0000 Digestive Fetal Intestini GI\_INTESTINE  
 1.0000 Blood & T-cel Primary T cell BLOOD  
 1.0000 Blood & T-cel Primary T hel BLOOD  
 1.0000 ENCODE2012 HeLa-S3 Cervi CERVIX  
 1.0000 Blood & T-cel Primary T CD8 BLOOD  
 1.0000 Blood & T-cel Primary T hel BLOOD  
 1.0000 ENCODE2012 Monocytes-C BLOOD  
 1.0000 HSC & B-cell Primary neut BLOOD  
 1.0000 Brain Brain Cingula BRAIN  
 1.0000 Epithelial Breast varian BREAST  
 1.0000 Epithelial Foreskin Fibrc SKIN  
 1.0000 Myosat Muscle Satell MUSCLE  
 1.0000 ES-deriv H1 BMP4 Der ESC\_DERIVED  
 1.0000 ESC HUES6 Cells ESC  
 1.0000 ENCODE2012 HSMM cell de MUSCLE  
 1.0000 HSC & B-cell Primary hemc BLOOD  
 1.0000 Sm. Muscle Stomach Smo GI\_STOMACH  
 1.0000 Muscle Fetal Muscle MUSCLE\_LEG  
 1.0000 Epithelial Foreskin Melc SKIN  
 1.0000 Other Fetal Kidney KIDNEY  
 1.0000 Other Fetal Lung LUNG  
 1.0000 iPSC iPS DF 19.11 (IPSC  
 1.0000 ENCODE2012 GM12878 Lyr BLOOD

1.0000 HSC & B-cell Primary hemæ BLOOD  
 1.0000 ENCODE2012 Osteoblast Pr BONE  
 1.0000 Thymus Thymus THYMUS  
 1.0000 ES-deriv H1 Derived N ESC\_DERIVED  
 1.0000 HSC & B-cell Primary Natu BLOOD  
 1.0000 Neurosph Cortex derive BRAIN  
 1.0000 Sm. Muscle Colon Smooth GI\_COLON  
 1.0000 ESC ES-UCSF4 Cel ESC  
 1.0000 Neurosph Ganglion Emi BRAIN  
 1.0000 HSC & B-cell Primary monæ BLOOD  
 1.0000 Blood & T-cel Primary T hel BLOOD  
 1.0000 ENCODE2012 HSMM cell de MUSCLE  
 1.0000 Blood & T-cel Primary T hel BLOOD  
 1.0000 Epithelial Foreskin Fibræ SKIN  
 1.0000 Blood & T-cel Primary T hel BLOOD  
 1.0000 Other Liver LIVER  
 1.0000 Heart Right Ventricle HEART  
 1.0000 ES-deriv H1 BMP4 Der ESC\_DERIVED  
 1.0000 Other Lung LUNG  
 1.0000 Brain Brain Anterio BRAIN  
 1.0000 Heart Aorta VASCULAR  
 1.0000 Adipose Adipose Nuclæ FAT  
 1.0000 Epithelial Breast varianæ BREAST  
 1.0000 Blood & T-cel Primary T hel BLOOD  
 1.0000 ENCODE2012 NHEK-Epiderr SKIN  
 1.0000 Blood & T-cel Primary T hel BLOOD  
 1.0000 HSC & B-cell Primary hemæ BLOOD  
 1.0000 ESC H1 Cells ESC  
 1.0000 Heart Right Atrium HEART  
 1.0000 Heart Aorta VASCULAR  
 1.0000 Other Pancreatic Islæ PANCREAS  
 1.0000 Digestive Gastric GI\_STOMACH  
 1.0000 Digestive Duodenum M GI\_DUODENUM  
 1.0000 Blood & T-cel Primary T CDæ BLOOD  
 1.0000 Other Lung LUNG  
 1.0000 Other Liver LIVER  
 1.0000 ENCODE2012 NH-A Astrocy BRAIN  
 1.0000 ESC ES-UCSF4 Cel ESC  
 1.0000 ES-deriv H1 Derived M ESC\_DERIVED  
 1.0000 ES-deriv hESC Derived ESC\_DERIVED  
 1.0000 Mesench Mesenchyma STROMAL\_CONNECTIVE  
 1.0000 Adipose Adipose Nuclæ FAT  
 1.0000 iPSC iPS-15b Cells IPSC

1.0000 ENCODE2012 HUVEC Umbil VASCULAR  
 1.0000 Brain Fetal Brain Fe BRAIN  
 1.0000 Epithelial Foreskin Fibrc SKIN  
 1.0000 Other Fetal Kidney KIDNEY  
 1.0000 ESC ES-I3 Cells ESC  
 1.0000 Digestive Small Intestin GI\_INTESTINE  
 1.0000 Epithelial Breast Myoeç BREAST  
 1.0000 IMR90 IMR90 fetal lu LUNG  
 1.0000 Digestive Duodenum M GI\_DUODENUM  
 1.0000 ESC ES-WA7 Cells ESC  
 1.0000 Digestive Colonic Muco GI\_COLON  
 1.0000 Epithelial Foreskin Fibrc SKIN  
 1.0000 Thymus Thymus THYMUS  
 1.0000 ESC HUES64 Cells ESC  
 1.0000 Sm. Muscle Rectal Smoot GI\_RECTUM  
 1.0000 Other Fetal Adrenal ADRENAL  
 1.0000 Epithelial Foreskin Kera SKIN  
 1.0000 Digestive Rectal Mucos GI\_RECTUM  
 1.0000 ESC HUES64 Cells ESC  
 1.0000 iPSC iPS-15b Cells IPSC  
 1.0000 Digestive Esophagus GI\_ESOPHAGUS  
 1.0000 Brain Fetal Brain Fe BRAIN  
 1.0000 ES-deriv hESC Derived ESC\_DERIVED  
 1.0000 Blood & T-cel Primary monc BLOOD  
 1.0000 Digestive Sigmoid Coloi GI\_COLON  
 1.0000 Other Pancreas PANCREAS  
 1.0000 Mesench Bone Marrow STROMAL\_CONNECTIVE  
 1.0000 Blood & T-cel Primary T cell BLOOD  
 1.0000 HSC & B-cell Primary Natu BLOOD  
 1.0000 HSC & B-cell Primary B cell BLOOD  
 1.0000 ESC HUES48 Cells ESC  
 1.0000 Sm. Muscle Colon Smootf GI\_COLON  
 1.0000 iPSC iPS-18 Cells IPSC  
 1.0000 ENCODE2012 HSMM cell de MUSCLE  
 1.0000 Heart Right Ventricl HEART  
 1.0000 ES-deriv H9 Derived N ESC\_DERIVED  
 1.0000 Brain Brain Germin BRAIN  
 1.0000 Mesench Mesenchyma STROMAL\_CONNECTIVE  
 1.0000 HSC & B-cell Primary B cell BLOOD  
 1.0000 ESC ES-WA7 Cells ESC  
 1.0000 Sm. Muscle Rectal Smoot GI\_RECTUM  
 1.0000 Digestive Sigmoid Coloi GI\_COLON  
 1.0000 Other Placenta Amr PLACENTA

|        |               |                 |                    |
|--------|---------------|-----------------|--------------------|
| 1.0000 | Epithelial    | Foreskin Fibrc  | SKIN               |
| 1.0000 | Epithelial    | Foreskin Fibrc  | SKIN               |
| 1.0000 | ENCODE2012    | HUVEC Umbil     | VASCULAR           |
| 1.0000 | Epithelial    | Foreskin Kera   | SKIN               |
| 1.0000 | Heart         | Left Ventricle  | HEART              |
| 1.0000 | Epithelial    | Foreskin Melc   | SKIN               |
| 1.0000 | IMR90         | IMR90 fetal l   | LUNG               |
| 1.0000 | iPSC          | iPS-18 Cells    | IPSC               |
| 1.0000 | ESC           | HUES48 Cells    | ESC                |
| 1.0000 | Digestive     | Fetal Intestin  | GI_INTESTINE       |
| 1.0000 | Digestive     | Colonic Muco    | GI_COLON           |
| 1.0000 | Brain         | Brain Substar   | BRAIN              |
| 1.0000 | iPSC          | iPS DF 6.9 Cel  | IPSC               |
| 1.0000 | Muscle        | Psoas Muscle    | MUSCLE             |
| 1.0000 | Other         | Pancreatic Isl  | PANCREAS           |
| 1.0000 | Other         | Spleen          | SPLEEN             |
| 1.0000 | ENCODE2012    | NHDF-Ad Adc     | SKIN               |
| 1.0000 | Heart         | Right Ventricle | HEART              |
| 1.0000 | ENCODE2012    | Osteoblast Pr   | BONE               |
| 1.0000 | ENCODE2012    | GM12878 Lyr     | BLOOD              |
| 1.0000 | ESC           | HUES64 Cells    | ESC                |
| 1.0000 | Mesench       | Bone Marrow     | STROMAL_CONNECTIVE |
| 1.0000 | ENCODE2012    | Dnd41 TCell L   | BLOOD              |
| 1.0000 | Heart         | Right Ventricle | HEART              |
| 1.0000 | ES-deriv      | H1 BMP4 Der     | ESC_DERIVED        |
| 1.0000 | Digestive     | Esophagus       | GI_ESOPHAGUS       |
| 1.0000 | Digestive     | Stomach Muc     | GI_STOMACH         |
| 1.0000 | Muscle        | Psoas Muscle    | MUSCLE             |
| 1.0000 | Sm. Muscle    | Colon Smooth    | GI_COLON           |
| 1.0000 | Epithelial    | Foreskin Melc   | SKIN               |
| 1.0000 | Other         | Fetal Adrenal   | ADRENAL            |
| 1.0000 | ENCODE2012    | GM12878 Lyr     | BLOOD              |
| 1.0000 | iPSC          | iPS-15b Cells   | IPSC               |
| 1.0000 | Brain         | Brain Substar   | BRAIN              |
| 1.0000 | Sm. Muscle    | Duodenum Sr     | GI_DUODENUM        |
| 1.0000 | Heart         | Fetal Heart     | HEART              |
| 1.0000 | Blood & T-cel | Primary T hel   | BLOOD              |
| 1.0000 | Heart         | Left Ventricle  | HEART              |
| 1.0000 | ENCODE2012    | Monocytes-C     | BLOOD              |
| 1.0000 | HSC & B-cell  | Primary Natu    | BLOOD              |
| 1.0000 | Digestive     | Colonic Muco    | GI_COLON           |
| 1.0000 | Heart         | Left Ventricle  | HEART              |
| 1.0000 | iPSC          | iPS-20b Cells   | IPSC               |

1.0000 Digestive Rectal Mucos GI\_RECTUM  
 1.0000 Other Pancreas PANCREAS  
 1.0000 ENCODE2012 HepG2 Hepat LIVER  
 1.0000 ESC HUES6 Cells ESC  
 1.0000 Mesench Adipose Deriv FAT  
 1.0000 Thymus Thymus THYMUS  
 1.0000 Digestive Fetal Intestin GI\_INTESTINE  
 1.0000 Thymus Thymus THYMUS  
 1.0000 Brain Brain Inferior BRAIN  
 1.0000 Blood & T-cel Primary T cell BLOOD  
 1.0000 Brain Brain\_Dorsol BRAIN  
 1.0000 ES-deriv H1 Derived N ESC\_DERIVED  
 1.0000 Brain Brain Germin BRAIN  
 1.0000 ENCODE2012 HUVEC Umbil VASCULAR  
 1.0000 Digestive Rectal Mucos GI\_RECTUM  
 1.0000 Blood & T-cel Primary T hel BLOOD  
 1.0000 ENCODE2012 GM12878 Lyr BLOOD  
 1.0000 ENCODE2012 A549 EtOH 0. LUNG  
 1.0000 Digestive Fetal Stomach GI\_STOMACH  
 1.0000 Sm. Muscle Duodenum Sr GI\_DUODENUM  
 1.0000 ENCODE2012 HepG2 Hepat LIVER  
 1.0000 Epithelial Foreskin Fibr SKIN  
 1.0000 Other Liver LIVER  
 1.0000 Brain Brain Anterio BRAIN  
 1.0000 ESC HUES48 Cells ESC  
 1.0000 iPSC iPS DF 6.9 Cel IPSC  
 1.0000 ENCODE2012 HeLa-S3 Cervi CERVIX  
 1.0000 Heart Right Atrium HEART  
 1.0000 ES-deriv hESC Derived ESC\_DERIVED  
 1.0000 Blood & T-cel Primary T hel BLOOD  
 1.0000 Other Placenta Amr PLACENTA  
 1.0000 Blood & T-cel Primary T hel BLOOD  
 1.0000 Sm. Muscle Colon Smooth GI\_COLON  
 1.0000 ENCODE2012 NHEK-Epiderr SKIN  
 1.0000 ENCODE2012 HepG2 Hepat LIVER  
 1.0000 Epithelial Breast Myoe BREAST  
 1.0000 ES-deriv H1 BMP4 Der ESC\_DERIVED  
 1.0000 Heart Fetal Heart HEART  
 1.0000 Other Placenta Amr PLACENTA  
 1.0000 iPSC iPS-20b Cells IPSC  
 1.0000 ESC HUES6 Cells ESC  
 1.0000 Mesench Mesenchyma STROMAL\_CONNECTIVE  
 1.0000 Muscle Fetal Muscle MUSCLE\_LEG



|        |               |                |                    |
|--------|---------------|----------------|--------------------|
| 1.0000 | Muscle        | Skeletal Musc  | MUSCLE             |
| 1.0000 | Thymus        | Fetal Thymus   | THYMUS             |
| 1.0000 | ENCODE2012    | Dnd41 TCell    | L BLOOD            |
| 1.0000 | Other         | Fetal Lung     | LUNG               |
| 1.0000 | ENCODE2012    | NHEK-Epiderr   | SKIN               |
| 1.0000 | ES-deriv      | H1 BMP4 Der    | ESC_DERIVED        |
| 1.0000 | Epithelial    | Foreskin Melk  | SKIN               |
| 1.0000 | Other         | Placenta Amr   | PLACENTA           |
| 1.0000 | Sm. Muscle    | Rectal Smoot   | GI_RECTUM          |
| 1.0000 | ES-deriv      | hESC Derived   | ESC_DERIVED        |
| 1.0000 | Blood & T-cel | Primary T CD8  | BLOOD              |
| 1.0000 | ES-deriv      | H9 Derived N   | ESC_DERIVED        |
| 1.0000 | Digestive     | Rectal Mucos   | GI_RECTUM          |
| 1.0000 | ENCODE2012    | K562 Leukem    | BLOOD              |
| 1.0000 | Blood & T-cel | Primary T hel  | BLOOD              |
| 1.0000 | Blood & T-cel | Primary T reg  | BLOOD              |
| 1.0000 | Blood & T-cel | Primary T hel  | BLOOD              |
| 1.0000 | ES-deriv      | hESC Derived   | ESC_DERIVED        |
| 1.0000 | Muscle        | Skeletal Musc  | MUSCLE             |
| 1.0000 | Digestive     | Esophagus      | GI_ESOPHAGUS       |
| 1.0000 | ES-deriv      | hESC Derived   | ESC_DERIVED        |
| 1.0000 | ES-deriv      | hESC Derived   | ESC_DERIVED        |
| 1.0000 | ESC           | H1 Cells       | ESC                |
| 1.0000 | ES-deriv      | hESC Derived   | ESC_DERIVED        |
| 1.0000 | ESC           | ES-UCSF4 Cel   | ESC                |
| 1.0000 | ES-deriv      | hESC Derived   | ESC_DERIVED        |
| 1.0000 | ESC           | ES-WA7 Cells   | ESC                |
| 1.0000 | Digestive     | Sigmoid Color  | GI_COLON           |
| 1.0000 | Mesench       | Bone Marrow    | STROMAL_CONNECTIVE |
| 1.0000 | Epithelial    | Foreskin Kera  | SKIN               |
| 1.0000 | ENCODE2012    | Monocytes-C    | BLOOD              |
| 1.0000 | ES-deriv      | H1 BMP4 Der    | ESC_DERIVED        |
| 1.0000 | Brain         | Brain Hippocæ  | BRAIN              |
| 1.0000 | Heart         | Fetal Heart    | HEART              |
| 1.0000 | HSC & B-cell  | Primary B cell | BLOOD              |
| 1.0000 | Digestive     | Duodenum IV    | GI_DUODENUM        |
| 1.0000 | Sm. Muscle    | Stomach Smo    | GI_STOMACH         |
| 1.0000 | ENCODE2012    | A549 EtOH O.   | LUNG               |
| 1.0000 | ENCODE2012    | HUVEC Umbil    | VASCULAR           |
| 1.0000 | Digestive     | Esophagus      | GI_ESOPHAGUS       |
| 1.0000 | Brain         | Brain_Dorsol   | BRAIN              |
| 1.0000 | Epithelial    | Foreskin Kera  | SKIN               |
| 1.0000 | Brain         | Brain Angular  | BRAIN              |

1.0000 ENCODE2012 NHEK-Epiderr SKIN  
 1.0000 ES-deriv H1 BMP4 Der ESC\_DERIVED  
 1.0000 Muscle Psoas Muscle MUSCLE  
 1.0000 ENCODE2012 GM12878 Lyr BLOOD  
 1.0000 HSC & B-cell Primary B cell BLOOD  
 1.0000 Blood & T-cel Primary T CD8 BLOOD  
 1.0000 Digestive Sigmoid Coloi GI\_COLON  
 1.0000 Other Fetal Lung LUNG  
 1.0000 Digestive Gastric GI\_STOMACH  
 1.0000 Thymus Fetal Thymus THYMUS  
 1.0000 Epithelial Foreskin Kera SKIN  
 1.0000 Blood & T-cel Primary T CD8 BLOOD  
 1.0000 Brain Brain Cingula BRAIN  
 1.0000 ENCODE2012 NH-A Astrocy BRAIN  
 1.0000 ESC ES-WA7 Cells ESC  
 1.0000 Epithelial Foreskin Mel SKIN  
 1.0000 iPSC iPS DF 19.11 (IPSC  
 1.0000 ENCODE2012 NHDF-Ad Adu SKIN  
 1.0000 Other Pancreatic Isl PANCREAS  
 1.0000 iPSC iPS DF 19.11 (IPSC  
 1.0000 ES-deriv H1 BMP4 Der ESC\_DERIVED  
 1.0000 Digestive Rectal Mucos GI\_RECTUM  
 1.0000 Epithelial Foreskin Kera SKIN  
 1.0000 Epithelial Breast Myoe BREAST  
 1.0000 Blood & T-cel Primary T hel BLOOD  
 1.0000 Mesench Bone Marrow STROMAL\_CONNECTIVE  
 1.0000 ESC ES-13 Cells ESC  
 1.0000 ES-deriv hESC Derived ESC\_DERIVED  
 1.0000 Brain Brain Angular BRAIN  
 1.0000 Digestive Small Intestin GI\_INTESTINE  
 1.0000 Blood & T-cel Primary T hel BLOOD  
 1.0000 HSC & B-cell Primary hem BLOOD  
 1.0000 ENCODE2012 NHEK-Epiderr SKIN  
 1.0000 Brain Brain Anterio BRAIN  
 1.0000 Muscle Fetal Muscle MUSCLE\_LEG  
 1.0000 Blood & T-cel Primary mon BLOOD  
 1.0000 IMR90 IMR90 fetal LUNG  
 1.0000 Digestive Sigmoid Coloi GI\_COLON  
 1.0000 ENCODE2012 K562 Leukem BLOOD  
 1.0000 Blood & T-cel Primary T hel BLOOD  
 1.0000 ESC H9 Cells ESC  
 1.0000 Sm. Muscle Rectal Smoot GI\_RECTUM  
 1.0000 Sm. Muscle Stomach Smo GI\_STOMACH

1.0000 ESC ES-WA7 Cells ESC  
 1.0000 IMR90 IMR90 fetal Lt LUNG  
 1.0000 iPSC iPS-15b Cells IPSC  
 1.0000 ES-deriv H1 Derived N ESC\_DERIVED  
 1.0000 ENCODE2012 HepG2 Hepat LIVER  
 1.0000 HSC & B-cell Primary hemæ BLOOD  
 1.0000 Blood & T-cel Primary T hel BLOOD  
 1.0000 Brain Brain Substar BRAIN  
 1.0000 Blood & T-cel Primary T cell BLOOD  
 1.0000 Digestive Stomach Muc GI\_STOMACH  
 1.0000 Blood & T-cel Primary T reg BLOOD  
 1.0000 ES-deriv hESC Derived ESC\_DERIVED  
 1.0000 Brain Brain Cingula BRAIN  
 1.0000 ES-deriv hESC Derived ESC\_DERIVED  
 1.0000 Digestive Rectal Mucos GI\_RECTUM  
 1.0000 ENCODE2012 Dnd41 TCell L BLOOD  
 1.0000 ENCODE2012 K562 Leukem BLOOD  
 1.0000 ENCODE2012 HUVEC Umbil VASCULAR  
 1.0000 Mesench Bone Marrow STROMAL\_CONNECTIVE  
 1.0000 Brain Brain Inferior BRAIN  
 1.0000 Digestive Duodenum IV GI\_DUODENUM  
 1.0000 Mesench Mesenchyma FAT  
 1.0000 ENCODE2012 NHLF Lung Fil LUNG  
 1.0000 Blood & T-cel Primary T CD8 BLOOD  
 1.0000 ESC ES-I3 Cells ESC  
 1.0000 Epithelial Foreskin Kera SKIN  
 1.0000 Epithelial Foreskin Mel SKIN  
 1.0000 Myosat Muscle Satell MUSCLE  
 1.0000 Epithelial Foreskin Kera SKIN  
 1.0000 ES-deriv H9 Derived N ESC\_DERIVED  
 1.0000 Digestive Rectal Mucos GI\_RECTUM  
 1.0000 Mesench Adipose Deriv FAT  
 1.0000 Brain Brain Inferior BRAIN  
 1.0000 ES-deriv H1 BMP4 Der ESC\_DERIVED  
 1.0000 HSC & B-cell Primary Natu BLOOD  
 1.0000 Thymus Thymus THYMUS  
 1.0000 Muscle Skeletal Musc MUSCLE  
 1.0000 ESC HUES48 Cells ESC  
 1.0000 Digestive Small Intestin GI\_INTESTINE  
 1.0000 Sm. Muscle Stomach Smo GI\_STOMACH  
 1.0000 ES-deriv H1 BMP4 Der ESC\_DERIVED  
 1.0000 Mesench Mesenchyma FAT  
 1.0000 Blood & T-cel Primary T hel BLOOD

1.0000 ESC HUES6 Cells ESC  
 1.0000 ENCODE2012 Monocytes-C BLOOD  
 1.0000 iPSC iPS-15b Cells IPSC  
 1.0000 Digestive Duodenum M GI\_DUODENUM  
 1.0000 Muscle Fetal Muscle MUSCLE  
 1.0000 Adipose Adipose Nucl FAT  
 1.0000 Other Pancreatic Isl PANCREAS  
 1.0000 Other Lung LUNG  
 1.0000 ENCODE2012 NH-A Astrocy BRAIN  
 1.0000 Digestive Rectal Mucos GI\_RECTUM  
 1.0000 ENCODE2012 K562 Leukem BLOOD  
 1.0000 Blood & T-cel Primary T cell BLOOD  
 1.0000 HSC & B-cell Primary hem BLOOD  
 1.0000 Digestive Fetal Intestin GI\_INTESTINE  
 1.0000 Digestive Gastric GI\_STOMACH  
 1.0000 Muscle Skeletal Musc MUSCLE  
 1.0000 Sm. Muscle Rectal Smoot GI\_RECTUM  
 1.0000 Adipose Adipose Nucl FAT  
 1.0000 ES-deriv hESC Derived ESC\_DERIVED  
 1.0000 Brain Brain Substar BRAIN  
 1.0000 Other Pancreatic Isl PANCREAS  
 1.0000 Digestive Colonic Muco GI\_COLON  
 1.0000 ENCODE2012 HSMM cell de MUSCLE  
 1.0000 Epithelial Foreskin Kera SKIN  
 1.0000 IMR90 IMR90 fetal LUNG  
 1.0000 Sm. Muscle Stomach Smo GI\_STOMACH  
 1.0000 Myosat Muscle Satell MUSCLE  
 1.0000 ENCODE2012 GM12878 Lyr BLOOD  
 1.0000 ESC ES-13 Cells ESC  
 1.0000 Epithelial Breast varian BREAST  
 1.0000 Digestive Stomach Muc GI\_STOMACH  
 1.0000 Other Pancreatic Isl PANCREAS  
 1.0000 ES-deriv H1 Derived N ESC\_DERIVED  
 1.0000 ESC HUES48 Cells ESC  
 1.0000 Neurosph Ganglion Emi BRAIN  
 1.0000 Digestive Small Intestin GI\_INTESTINE  
 1.0000 ENCODE2012 HSMM cell de MUSCLE  
 1.0000 Epithelial Foreskin Fibr SKIN  
 1.0000 Adipose Adipose Nucl FAT  
 1.0000 Digestive Stomach Muc GI\_STOMACH  
 1.0000 Muscle Skeletal Musc MUSCLE  
 1.0000 Blood & T-cel Primary T hel BLOOD  
 1.0000 Mesench Bone Marrow STROMAL\_CONNECTIVE

1.0000 HSC & B-cell Primary hemæ BLOOD  
 1.0000 Muscle Fetal Muscle MUSCLE  
 1.0000 ENCODE2012 HSMM Skelet MUSCLE  
 1.0000 ENCODE2012 Osteoblast Pr BONE  
 1.0000 Adipose Adipose Nucl FAT  
 1.0000 Digestive Fetal Intestin GI\_INTESTINE  
 1.0000 ENCODE2012 Osteoblast Pr BONE  
 1.0000 Digestive Fetal Stomac GI\_STOMACH  
 1.0000 ENCODE2012 HSMM Skelet MUSCLE  
 1.0000 ENCODE2012 HSMM cell de MUSCLE  
 1.0000 Blood & T-cel Primary T cell BLOOD  
 1.0000 ENCODE2012 HMEC Mamr BREAST  
 1.0000 Brain Brain Anterio BRAIN  
 1.0000 Mesench Adipose Deriv FAT  
 1.0000 ENCODE2012 Osteoblast Pr BONE  
 1.0000 ENCODE2012 GM12878 Lyr BLOOD  
 1.0000 ES-deriv H9 Derived N ESC\_DERIVED  
 1.0000 ENCODE2012 Monocytes-C BLOOD  
 1.0000 Brain Brain Anterio BRAIN  
 1.0000 ES-deriv H1 BMP4 Der ESC\_DERIVED  
 1.0000 Other Placenta Amr PLACENTA  
 1.0000 Blood & T-cel Primary T hel BLOOD  
 1.0000 ENCODE2012 HSMM cell de MUSCLE  
 1.0000 Epithelial Foreskin Mel SKIN  
 1.0000 Digestive Fetal Intestin GI\_INTESTINE  
 1.0000 Digestive Fetal Intestin GI\_INTESTINE  
 1.0000 ENCODE2012 NHEK-Epiderr SKIN  
 1.0000 Brain Brain Inferior BRAIN  
 1.0000 Sm. Muscle Stomach Smo GI\_STOMACH  
 1.0000 Sm. Muscle Duodenum Sr GI\_DUODENUM  
 1.0000 Blood & T-cel Primary T cell BLOOD  
 1.0000 Epithelial Breast varian BREAST  
 1.0000 ENCODE2012 HepG2 Hepat LIVER  
 1.0000 iPSC iPS-15b Cells IPSC  
 1.0000 Blood & T-cel Primary T CD4 BLOOD  
 1.0000 iPSC iPS-18 Cells IPSC  
 1.0000 iPSC iPS-15b Cells IPSC  
 1.0000 Neurosph Cortex derive BRAIN  
 1.0000 Epithelial Foreskin Mel SKIN  
 1.0000 Mesench Mesenchyma STROMAL\_CONNECTIVE  
 1.0000 iPSC iPS-20b Cells IPSC  
 1.0000 Heart Fetal Heart HEART  
 1.0000 iPSC iPS-20b Cells IPSC

1.0000 ENCODE2012 NHDF-Ad Adu SKIN  
 1.0000 ENCODE2012 NHDF-Ad Adu SKIN  
 1.0000 Sm. Muscle Duodenum Sr GI\_DUODENUM  
 1.0000 iPSC iPS-18 Cells IPSC  
 1.0000 Blood & T-cel Primary monc BLOOD  
 1.0000 Muscle Skeletal Musc MUSCLE  
 1.0000 Heart Aorta VASCULAR  
 1.0000 ESC HUES6 Cells ESC  
 1.0000 Heart Left Ventricle HEART  
 1.0000 Sm. Muscle Colon Smooth GI\_COLON  
 1.0000 Blood & T-cel Primary monc BLOOD  
 1.0000 ENCODE2012 HMEC Mamr BREAST  
 1.0000 Mesench Mesenchyma FAT  
 1.0000 ESC HUES6 Cells ESC  
 1.0000 iPSC iPS DF 19.11 (IPSC  
 1.0000 HSC & B-cell Primary hemc BLOOD  
 1.0000 ENCODE2012 GM12878 Lyr BLOOD  
 1.0000 Heart Aorta VASCULAR  
 1.0000 ENCODE2012 NHEK-Epiderr SKIN  
 1.0000 ESC ES-UCSF4 Cel ESC  
 1.0000 Brain Brain Inferior BRAIN  
 1.0000 Heart Aorta VASCULAR  
 1.0000 Heart Aorta VASCULAR  
 1.0000 ENCODE2012 A549 EtOH 0. LUNG  
 1.0000 Epithelial Breast Myoeç BREAST  
 1.0000 Myosat Muscle Satell MUSCLE  
 1.0000 ENCODE2012 A549 EtOH 0. LUNG  
 1.0000 Mesench Bone Marrow STROMAL\_CONNECTIVE  
 1.0000 ENCODE2012 Osteoblast Pr BONE  
 1.0000 ES-deriv hESC Derived ESC\_DERIVED  
 1.0000 Mesench Mesenchyma FAT  
 1.0000 Digestive Fetal Intestin GI\_INTESTINE  
 1.0000 Blood & T-cel Primary T hel BLOOD  
 1.0000 ES-deriv H1 BMP4 Der ESC\_DERIVED  
 1.0000 ESC H9 Cells ESC  
 1.0000 Mesench Mesenchyma STROMAL\_CONNECTIVE  
 1.0000 Mesench Bone Marrow STROMAL\_CONNECTIVE  
 1.0000 Other Fetal Kidney KIDNEY  
 1.0000 Brain Brain Angular BRAIN  
 1.0000 Other Fetal Lung LUNG  
 1.0000 HSC & B-cell Primary hemc BLOOD  
 1.0000 ESC HUES64 Cells ESC  
 1.0000 Epithelial Foreskin Kera SKIN

|        |              |                |                    |
|--------|--------------|----------------|--------------------|
| 1.0000 | ESC          | ES-UCSF4 Cel   | ESC                |
| 1.0000 | ES-deriv     | hESC Derived   | ESC_DERIVED        |
| 1.0000 | Neurosph     | Ganglion Emi   | BRAIN              |
| 1.0000 | Digestive    | Stomach Muc    | GI_STOMACH         |
| 1.0000 | Digestive    | Sigmoid Color  | GI_COLON           |
| 1.0000 | ENCODE2012   | HMEC Mamr      | BREAST             |
| 1.0000 | ESC          | HUES48 Cells   | ESC                |
| 1.0000 | ENCODE2012   | HeLa-S3 Cervi  | CERVIX             |
| 1.0000 | Digestive    | Duodenum M     | GI_DUODENUM        |
| 1.0000 | ENCODE2012   | NHEK-Epiderr   | SKIN               |
| 1.0000 | Neurosph     | Ganglion Emi   | BRAIN              |
| 1.0000 | ENCODE2012   | NHLF Lung Fil  | LUNG               |
| 1.0000 | Adipose      | Adipose Nucl   | FAT                |
| 1.0000 | IMR90        | IMR90 fetal l  | LUNG               |
| 1.0000 | ES-deriv     | H9 Derived N   | ESC_DERIVED        |
| 1.0000 | HSC & B-cell | Primary hem    | BLOOD              |
| 1.0000 | Digestive    | Colonic Muco   | GI_COLON           |
| 1.0000 | iPSC         | iPS-18 Cells   | IPSC               |
| 1.0000 | ES-deriv     | H9 Derived N   | ESC_DERIVED        |
| 1.0000 | ENCODE2012   | HepG2 Hepat    | LIVER              |
| 1.0000 | iPSC         | iPS-20b Cells  | IPSC               |
| 1.0000 | Other        | Ovary          | OVARY              |
| 1.0000 | Digestive    | Fetal Intestin | GI_INTESTINE       |
| 1.0000 | ENCODE2012   | HMEC Mamr      | BREAST             |
| 1.0000 | Neurosph     | Cortex derive  | BRAIN              |
| 1.0000 | Mesench      | Bone Marrow    | STROMAL_CONNECTIVE |
| 1.0000 | Heart        | Right Atrium   | HEART              |
| 1.0000 | Heart        | Left Ventricle | HEART              |
| 1.0000 | IMR90        | IMR90 fetal l  | LUNG               |
| 1.0000 | Other        | Fetal Lung     | LUNG               |
| 1.0000 | Other        | Fetal Adrenal  | ADRENAL            |
| 1.0000 | ES-deriv     | hESC Derived   | ESC_DERIVED        |
| 1.0000 | iPSC         | iPS-20b Cells  | IPSC               |
| 1.0000 | HSC & B-cell | Primary hem    | BLOOD              |
| 1.0000 | Myosat       | Muscle Satell  | MUSCLE             |
| 1.0000 | Digestive    | Fetal Intestin | GI_INTESTINE       |
| 1.0000 | Muscle       | Fetal Muscle   | MUSCLE_LEG         |
| 1.0000 | Digestive    | Rectal Mucos   | GI_RECTUM          |
| 1.0000 | ENCODE2012   | NHDF-Ad Ad     | SKIN               |
| 1.0000 | ENCODE2012   | HUVEC Umbil    | VASCULAR           |
| 1.0000 | ESC          | H9 Cells       | ESC                |
| 1.0000 | ES-deriv     | H1 Derived M   | ESC_DERIVED        |
| 1.0000 | ESC          | H1 Cells       | ESC                |

1.0000 Blood & T-cell Primary T hel BLOOD  
 1.0000 iPSC iPS DF 6.9 Cell IPSC  
 1.0000 Digestive Gastric GI\_STOMACH  
 1.0000 ESC H1 Cells ESC  
 1.0000 ESC HUES48 Cells ESC  
 1.0000 HSC & B-cell Primary hemæ BLOOD  
 1.0000 Mesench Adipose Deriv FAT  
 1.0000 Digestive Colonic Muco GI\_COLON  
 1.0000 Digestive Fetal Intestin GI\_INTESTINE  
 1.0000 Mesench Adipose Deriv FAT  
 1.0000 Sm. Muscle Rectal Smoot GI\_RECTUM  
 1.0000 ESC H1 Cells ESC  
 1.0000 ENCODE2012 HSMM Skelet MUSCLE  
 1.0000 Digestive Esophagus GI\_ESOPHAGUS  
 1.0000 ES-deriv H1 BMP4 Der ESC\_DERIVED  
 1.0000 Blood & T-cell Primary mon BLOOD  
 1.0000 ESC H1 Cells ESC  
 1.0000 Other Placenta Amr PLACENTA  
 1.0000 Other Fetal Adrenal ADRENAL  
 1.0000 Digestive Fetal Intestin GI\_INTESTINE  
 1.0000 ES-deriv hESC Derived ESC\_DERIVED  
 1.0000 Heart Fetal Heart HEART  
 1.0000 Sm. Muscle Rectal Smoot GI\_RECTUM  
 1.0000 ESC HUES64 Cells ESC  
 1.0000 iPSC iPS-18 Cells IPSC  
 1.0000 iPSC iPS DF 6.9 Cell IPSC  
 1.0000 Muscle Fetal Muscle MUSCLE\_LEG  
 1.0000 ENCODE2012 HepG2 Hepat LIVER  
 1.0000 Muscle Fetal Muscle MUSCLE  
 1.0000 Epithelial Foreskin Mel SKIN  
 1.0000 iPSC iPS DF 6.9 Cell IPSC  
 1.0000 iPSC iPS DF 19.11 Cell IPSC  
 1.0000 ES-deriv hESC Derived ESC\_DERIVED  
 1.0000 Blood & T-cell Primary T cell BLOOD  
 1.0000 Mesench Mesenchyma STROMAL\_CONNECTIVE  
 1.0000 ES-deriv H1 Derived M ESC\_DERIVED  
 1.0000 iPSC iPS-18 Cells IPSC  
 1.0000 HSC & B-cell Primary hemæ BLOOD  
 1.0000 Thymus Thymus THYMUS  
 1.0000 HSC & B-cell Primary hemæ BLOOD  
 1.0000 ESC HUES6 Cells ESC  
 1.0000 Digestive Rectal Mucos GI\_RECTUM  
 1.0000 ENCODE2012 HepG2 Hepat LIVER



1.0000 Blood & T-cel Primary T CD8 BLOOD  
 1.0000 Digestive Rectal Mucos GI\_RECTUM  
 1.0000 Other Lung LUNG  
 1.0000 ENCODE2012 NHLF Lung Fit LUNG  
 1.0000 ENCODE2012 NHEK-Epiderr SKIN  
 1.0000 Other Pancreatic Isl PANCREAS  
 1.0000 ENCODE2012 NHLF Lung Fit LUNG  
 1.0000 Blood & T-cel Primary T CD8 BLOOD  
 1.0000 Blood & T-cel Primary mon BLOOD  
 1.0000 IMR90 IMR90 fetal lu LUNG  
 1.0000 Other Placenta PLACENTA  
 1.0000 ESC ES-13 Cells ESC  
 1.0000 ES-deriv hESC Derived ESC\_DERIVED  
 1.0000 Epithelial Foreskin Mel SKIN  
 1.0000 ESC HUES6 Cells ESC  
 1.0000 ENCODE2012 HepG2 Hepat LIVER  
 1.0000 Other Ovary OVARY  
 1.0000 ESC HUES64 Cells ESC  
 1.0000 ENCODE2012 HSMM cell de MUSCLE  
 1.0000 Mesench Adipose Deriv FAT  
 1.0000 Blood & T-cel Primary T hel BLOOD  
 1.0000 ENCODE2012 NHLF Lung Fit LUNG  
 1.0000 Brain Brain Substar BRAIN  
 1.0000 Myosat Muscle Satell MUSCLE  
 1.0000 Thymus Fetal Thymus THYMUS  
 1.0000 Digestive Rectal Mucos GI\_RECTUM  
 1.0000 Digestive Rectal Mucos GI\_RECTUM  
 1.0000 Epithelial Foreskin Mel SKIN  
 1.0000 HSC & B-cell Primary mon BLOOD  
 1.0000 ES-deriv H1 Derived N ESC\_DERIVED  
 1.0000 ESC HUES48 Cells ESC  
 1.0000 Sm. Muscle Rectal Smoot GI\_RECTUM  
 1.0000 Other Liver LIVER  
 1.0000 ESC H1 Cells ESC  
 1.0000 ES-deriv hESC Derived ESC\_DERIVED  
 1.0000 iPSC iPS-18 Cells IPSC  
 1.0000 ES-deriv H1 BMP4 Der ESC\_DERIVED  
 1.0000 ENCODE2012 NHEK-Epiderr SKIN  
 1.0000 Digestive Rectal Mucos GI\_RECTUM  
 1.0000 iPSC iPS DF 19.11 (IPSC  
 1.0000 ES-deriv hESC Derived ESC\_DERIVED  
 1.0000 ENCODE2012 NH-A Astrocy BRAIN  
 1.0000 ES-deriv H9 Derived N ESC\_DERIVED

1.0000 Epithelial Breast variant BREAST  
 1.0000 ESC ES-WA7 Cells ESC  
 1.0000 ES-deriv H1 BMP4 Der ESC\_DERIVED  
 1.0000 Digestive Fetal Stomach GI\_STOMACH  
 1.0000 Brain Brain Germin BRAIN  
 1.0000 ESC HUES64 Cells ESC  
 1.0000 Mesench Mesenchyma FAT  
 1.0000 ESC H9 Cells ESC  
 1.0000 Epithelial Foreskin Mel SKIN  
 1.0000 ENCODE2012 Monocytes-C BLOOD  
 1.0000 Blood & T-cell Primary T hel BLOOD  
 1.0000 ENCODE2012 A549 EtOH 0. LUNG  
 1.0000 ES-deriv H1 Derived N ESC\_DERIVED  
 1.0000 ENCODE2012 HeLa-S3 Cervi CERVIX  
 1.0000 ENCODE2012 NHDF-Ad Adu SKIN  
 1.0000 ES-deriv H1 BMP4 Der ESC\_DERIVED  
 1.0000 Thymus Fetal Thymus THYMUS  
 1.0000 HSC & B-cell Primary Natu BLOOD  
 1.0000 ENCODE2012 A549 EtOH 0. LUNG  
 1.0000 Blood & T-cell Primary T hel BLOOD  
 1.0000 iPSC iPS-20b Cells IPSC  
 1.0000 iPSC iPS-20b Cells IPSC  
 1.0000 ENCODE2012 HMEC Mamr BREAST  
 1.0000 ES-deriv H1 Derived M ESC\_DERIVED  
 1.0000 Other Placenta PLACENTA  
 1.0000 Brain Brain Cingula BRAIN  
 1.0000 Brain Brain Substar BRAIN  
 1.0000 Other Pancreas PANCREAS  
 1.0000 Sm. Muscle Rectal Smoot GI\_RECTUM  
 1.0000 Other Ovary OVARY  
 1.0000 ESC HUES6 Cells ESC  
 1.0000 Epithelial Foreskin Kera SKIN  
 1.0000 Mesench Bone Marrow STROMAL\_CONNECTIVE  
 1.0000 ES-deriv H9 Derived N ESC\_DERIVED  
 1.0000 ESC H1 Cells ESC  
 1.0000 Digestive Small Intestin GI\_INTESTINE  
 1.0000 iPSC iPS-20b Cells IPSC  
 1.0000 ES-deriv hESC Derived ESC\_DERIVED  
 1.0000 ENCODE2012 HMEC Mamr BREAST  
 1.0000 Digestive Sigmoid Color GI\_COLON  
 1.0000 ES-deriv H9 Derived N ESC\_DERIVED  
 1.0000 ESC ES-WA7 Cells ESC  
 1.0000 Neurosph Ganglion Emi BRAIN

1.0000 Blood & T-cel Primary T hel BLOOD  
 1.0000 ESC HUES6 Cells ESC  
 1.0000 Neurosph Cortex derive BRAIN  
 1.0000 Epithelial Breast varian BREAST  
 1.0000 Sm. Muscle Duodenum Sr GI\_DUODENUM  
 1.0000 Mesench Bone Marrow STROMAL\_CONNECTIVE  
 1.0000 Blood & T-cel Primary mon BLOOD  
 1.0000 ENCODE2012 NH-A Astrocy BRAIN  
 1.0000 Digestive Esophagus GI\_ESOPHAGUS  
 1.0000 Brain Fetal Brain M BRAIN  
 1.0000 Digestive Fetal Intestin GI\_INTESTINE  
 1.0000 Heart Right Ventricle HEART  
 1.0000 iPSC iPS-20b Cells IPSC  
 1.0000 Digestive Fetal Stomach GI\_STOMACH  
 1.0000 Digestive Rectal Mucos GI\_RECTUM  
 1.0000 Mesench Mesenchyma FAT  
 1.0000 Blood & T-cel Primary T hel BLOOD  
 1.0000 Sm. Muscle Rectal Smoot GI\_RECTUM  
 1.0000 Brain Brain Anterio BRAIN  
 1.0000 ESC HUES48 Cells ESC  
 1.0000 Blood & T-cel Primary T cell BLOOD  
 1.0000 iPSC iPS DF 6.9 Cell IPSC  
 1.0000 ESC HUES64 Cells ESC  
 1.0000 ENCODE2012 HMEC Mamr BREAST  
 1.0000 Other Placenta Amr PLACENTA  
 1.0000 Brain Brain Cingula BRAIN  
 1.0000 ESC HUES64 Cells ESC  
 1.0000 Muscle Skeletal Musc MUSCLE  
 1.0000 ESC ES-13 Cells ESC  
 1.0000 Heart Right Atrium HEART  
 1.0000 Thymus Fetal Thymus THYMUS  
 1.0000 iPSC iPS DF 19.11 (IPSC  
 1.0000 Mesench Mesenchyma FAT  
 1.0000 HSC & B-cell Primary B cell BLOOD  
 1.0000 ESC HUES48 Cells ESC  
 1.0000 ENCODE2012 K562 Leukem BLOOD  
 1.0000 Brain Brain\_Dorsol BRAIN  
 1.0000 Sm. Muscle Colon Smoot GI\_COLON  
 1.0000 Blood & T-cel Primary T hel BLOOD  
 1.0000 ES-deriv H1 Derived N ESC\_DERIVED  
 1.0000 ENCODE2012 A549 EtOH 0. LUNG  
 1.0000 ES-deriv H9 Derived N ESC\_DERIVED  
 1.0000 Brain Brain Inferior BRAIN

1.0000 Thymus Fetal Thymus THYMUS  
 1.0000 Sm. Muscle Rectal Smoot GI\_RECTUM  
 1.0000 Blood & T-cel Primary T reg BLOOD  
 1.0000 Brain Brain Angular BRAIN  
 1.0000 Blood & T-cel Primary T cell BLOOD  
 1.0000 ENCODE2012 HeLa-S3 Cervi CERVIX  
 1.0000 ENCODE2012 K562 Leukem BLOOD  
 1.0000 ESC H9 Cells ESC  
 1.0000 ENCODE2012 HeLa-S3 Cervi CERVIX  
 1.0000 Digestive Esophagus GI\_ESOPHAGUS  
 1.0000 Mesench Mesenchyma STROMAL\_CONNECTIVE  
 1.0000 ESC H1 Cells ESC  
 1.0000 ENCODE2012 K562 Leukem BLOOD  
 1.0000 Other Fetal Kidney KIDNEY  
 1.0000 iPSC iPS DF 6.9 Cell IPSC  
 1.0000 Blood & T-cel Primary T hel BLOOD  
 1.0000 Digestive Small Intestin GI\_INTESTINE  
 1.0000 iPSC iPS-20b Cells IPSC  
 1.0000 Other Fetal Adrenal ADRENAL  
 1.0000 Brain Brain Substar BRAIN  
 1.0000 Sm. Muscle Duodenum Sr GI\_DUODENUM  
 1.0000 Brain Brain Hippocæ BRAIN  
 1.0000 ENCODE2012 HUVEC Umbil VASCULAR  
 1.0000 iPSC iPS-18 Cells IPSC  
 1.0000 Brain Brain Germin BRAIN  
 1.0000 Blood & T-cel Primary T cell BLOOD  
 1.0000 Brain Brain Germin BRAIN  
 1.0000 Other Liver LIVER  
 1.0000 ES-deriv H1 Derived M ESC\_DERIVED  
 1.0000 Blood & T-cel Primary T CD8 BLOOD  
 1.0000 iPSC iPS DF 6.9 Cell IPSC  
 1.0000 Brain Brain\_Dorsolæ BRAIN  
 1.0000 Blood & T-cel Primary T hel BLOOD  
 1.0000 Blood & T-cel Primary T hel BLOOD  
 1.0000 HSC & B-cell Primary hemæ BLOOD  
 1.0000 Digestive Sigmoid Color GI\_COLON  
 1.0000 HSC & B-cell Primary hemæ BLOOD  
 1.0000 Epithelial Foreskin Kera SKIN  
 1.0000 iPSC iPS-15b Cells IPSC  
 1.0000 HSC & B-cell Primary B cell BLOOD  
 1.0000 ESC ES-UCSF4 Cell ESC  
 1.0000 ENCODE2012 NHLF Lung Fil LUNG  
 1.0000 ESC HUES48 Cells ESC

1.0000 ENCODE2012 K562 Leukem BLOOD  
 1.0000 Mesench Mesenchyma STROMAL\_CONNECTIVE  
 1.0000 ES-deriv H1 BMP4 Der ESC\_DERIVED  
 1.0000 Brain Brain Substar BRAIN  
 1.0000 ES-deriv H1 BMP4 Der ESC\_DERIVED  
 1.0000 iPSC iPS-18 Cells IPSC  
 1.0000 ESC ES-I3 Cells ESC  
 1.0000 Blood & T-cel Primary T hel BLOOD  
 1.0000 HSC & B-cell Primary hemæ BLOOD  
 1.0000 Blood & T-cel Primary T CD8 BLOOD  
 1.0000 Epithelial Foreskin Kera SKIN  
 1.0000 Brain Brain Hippocæ BRAIN  
 1.0000 ENCODE2012 NHEK-Epider SKIN  
 1.0000 ENCODE2012 NH-A Astrocy BRAIN  
 1.0000 ESC HUES64 Cells ESC  
 1.0000 Other Placenta Amr PLACENTA  
 1.0000 Thymus Thymus THYMUS  
 1.0000 ENCODE2012 HeLa-S3 Cervi CERVIX  
 1.0000 Brain Brain Anterio BRAIN  
 1.0000 Sm. Muscle Duodenum Sr GI\_DUODENUM  
 1.0000 Digestive Rectal Mucos GI\_RECTUM  
 1.0000 Mesench Mesenchyma STROMAL\_CONNECTIVE  
 1.0000 Epithelial Foreskin Kera SKIN  
 1.0000 Digestive Fetal Intestin GI\_INTESTINE  
 1.0000 Epithelial Foreskin Kera SKIN  
 1.0000 HSC & B-cell Primary Natu BLOOD  
 1.0000 Adipose Adipose Nucl FAT  
 1.0000 Blood & T-cel Primary T hel BLOOD  
 1.0000 Other Pancreas PANCREAS  
 1.0000 ENCODE2012 NHLF Lung Fit LUNG  
 1.0000 iPSC iPS-20b Cells IPSC  
 1.0000 Muscle Psoas Muscle MUSCLE  
 1.0000 Mesench Adipose Deriv FAT  
 1.0000 Mesench Adipose Deriv FAT  
 1.0000 ESC HUES48 Cells ESC  
 1.0000 ENCODE2012 GM12878 Lyr BLOOD  
 1.0000 ENCODE2012 GM12878 Lyr BLOOD  
 1.0000 HSC & B-cell Primary monæ BLOOD  
 1.0000 iPSC iPS-18 Cells IPSC  
 1.0000 ESC ES-I3 Cells ESC  
 1.0000 Blood & T-cel Primary T cell BLOOD  
 1.0000 HSC & B-cell Primary Natu BLOOD  
 1.0000 ENCODE2012 Monocytes-C BLOOD

1.0000 ESC HUES48 Cells ESC  
 1.0000 Blood & T-cel Primary T CD4 BLOOD  
 1.0000 Epithelial Foreskin Kera SKIN  
 1.0000 Brain Brain Inferior BRAIN  
 1.0000 Muscle Skeletal Musc MUSCLE  
 1.0000 Digestive Gastric GI\_STOMACH  
 1.0000 Blood & T-cel Primary T hel BLOOD  
 1.0000 ENCODE2012 NHEK-Epider SKIN  
 1.0000 ENCODE2012 GM12878 Lyr BLOOD  
 1.0000 ESC H1 Cells ESC  
 1.0000 Other Placenta Amr PLACENTA  
 1.0000 Blood & T-cel Primary T hel BLOOD  
 1.0000 ENCODE2012 GM12878 Lyr BLOOD  
 1.0000 iPSC iPS-15b Cells IPSC  
 1.0000 Heart Left Ventricle HEART  
 1.0000 ES-deriv hESC Derived ESC\_DERIVED  
 1.0000 Other Pancreatic Isl PANCREAS  
 1.0000 ES-deriv hESC Derived ESC\_DERIVED  
 1.0000 Other Liver LIVER  
 1.0000 ENCODE2012 HMEC Mamr BREAST  
 1.0000 ESC HUES64 Cells ESC  
 1.0000 ESC H1 Cells ESC  
 1.0000 iPSC iPS-20b Cells IPSC  
 1.0000 Muscle Skeletal Musc MUSCLE  
 1.0000 ES-deriv H1 Derived M ESC\_DERIVED  
 1.0000 ENCODE2012 A549 EtOH 0. LUNG  
 1.0000 Brain Brain Cingula BRAIN  
 1.0000 HSC & B-cell Primary hem BLOOD  
 1.0000 ENCODE2012 Monocytes-C BLOOD  
 1.0000 ESC HUES6 Cells ESC  
 1.0000 Brain Brain Hippoc BRAIN
